# Supplementary material for: Acyl-CoA thioesterase 13 (ACOT13) attenuates the progression of autosomal dominant polycystic kidney disease in vitro via triggering mitochondrial-related cell apoptosis
Source: publisher site journal article supplement (doi:10.18632/aging.206054), 2024-08-21
Supplement: Supplementary file [file aging-v16i16-206054-supplementary-material-SD1.pdf]

## SUPPLEMENTARY FIGURE

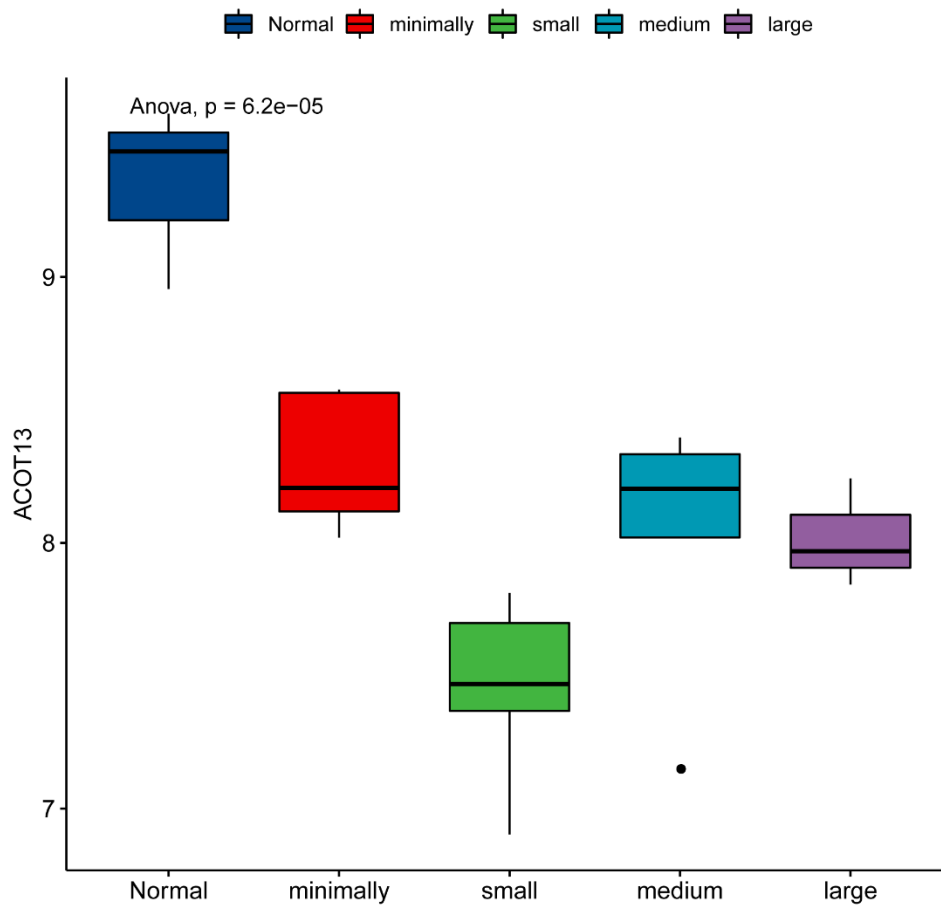

**Supplementary Figure 1. The mRNA level of *ACOT13* in different cysts.** The box plot showed the *ACOT13* level in normal renal cortical tissue, minimally cystic tissue, small cysts, medium cysts, large cysts in the GSE7869 dataset.
