# Supplementary material for: Acyl-CoA thioesterase 13 (ACOT13) attenuates the progression of autosomal dominant polycystic kidney disease in vitro via triggering mitochondrial-related cell apoptosis
Source: Aging (Albany NY). 2024 Aug 21;16(16):11877–92. doi: 10.18632/aging.206054 (PMC11386924; doi:10.18632/aging.206054)
Supplement: Supplementary Table 1 [file aging-16-206054-s002.xlsx]

## Sheet: GO-enrich
Supplementary Table 1. GO and KEGG analyses of DEGs between H- and L-ACOT13 groups.
ONTOLOGY	ID	Description	GeneRatio	BgRatio	pvalue	p.adjust	qvalue	geneID	Count
BP	GO:0044282	small molecule catabolic process	54/541	376/18800	8.98686e-23	3.98747e-19	3.1208e-19	NQO2/HADH/ENOSF1/PHYH/ECHS1/NPL/PCCB/GOT1/HIBCH/GLS/GK/ACAT1/HOGA1/ALDH6A1/PCK2/IMPA2/CYP4A11/ACOT4/UPP2/UPB1/FABP1/AMDHD1/DHDH/MIOX/ACAA2/HPD/ABAT/DAO/SORD/PCCA/EHHADH/HGD/GAD1/CYP27B1/PRODH2/CYP4F3/ALDH1L1/AMACR/CYP4F2/FTCD/ACADSB/KYNU/PFKFB2/ALDH1L2/AGXT2/APOE/ACMSD/MCCC2/PIPOX/ALDH4A1/PON1/SLC27A2/GDA/FUT6	54
BP	GO:0046395	carboxylic acid catabolic process	41/541	238/18800	1.68528e-20	3.73879e-17	2.92618e-17	HADH/ENOSF1/PHYH/ECHS1/NPL/PCCB/GOT1/HIBCH/GLS/ACAT1/HOGA1/ALDH6A1/PCK2/CYP4A11/ACOT4/FABP1/AMDHD1/ACAA2/HPD/ABAT/DAO/PCCA/EHHADH/HGD/GAD1/PRODH2/CYP4F3/ALDH1L1/AMACR/CYP4F2/FTCD/ACADSB/KYNU/ALDH1L2/AGXT2/ACMSD/MCCC2/PIPOX/ALDH4A1/PON1/SLC27A2	41
BP	GO:0016054	organic acid catabolic process	41/541	242/18800	3.20073e-20	4.73388e-17	3.70499e-17	HADH/ENOSF1/PHYH/ECHS1/NPL/PCCB/GOT1/HIBCH/GLS/ACAT1/HOGA1/ALDH6A1/PCK2/CYP4A11/ACOT4/FABP1/AMDHD1/ACAA2/HPD/ABAT/DAO/PCCA/EHHADH/HGD/GAD1/PRODH2/CYP4F3/ALDH1L1/AMACR/CYP4F2/FTCD/ACADSB/KYNU/ALDH1L2/AGXT2/ACMSD/MCCC2/PIPOX/ALDH4A1/PON1/SLC27A2	41
BP	GO:0006520	cellular amino acid metabolic process	41/541	285/18800	1.47662e-17	1.63794e-14	1.28194e-14	ENOSF1/ECHS1/SLC7A11/GOT1/HIBCH/GLS/ACAT1/HOGA1/PEPD/ALDH6A1/MSRA/ASL/BPHL/UPB1/GLYATL1/AMDHD1/GGT1/SLC7A7/IYD/HPD/PSAT1/BHMT2/ABAT/DAO/DIO1/GFPT2/HGD/GAD1/PRODH2/AGMAT/GLYAT/FTCD/ACADSB/KYNU/AGXT2/DPEP1/ACMSD/MCCC2/PIPOX/ALDH4A1/HNF4A	41
BP	GO:1901605	alpha-amino acid metabolic process	34/541	203/18800	8.24492e-17	7.31654e-14	5.72631e-14	SLC7A11/GOT1/HIBCH/GLS/ACAT1/HOGA1/ALDH6A1/MSRA/ASL/GLYATL1/AMDHD1/GGT1/SLC7A7/IYD/HPD/PSAT1/BHMT2/DAO/GFPT2/HGD/GAD1/PRODH2/AGMAT/GLYAT/FTCD/ACADSB/KYNU/AGXT2/DPEP1/ACMSD/MCCC2/PIPOX/ALDH4A1/HNF4A	34
BP	GO:0015711	organic anion transport	43/541	361/18800	2.64816e-15	1.95831e-12	1.53268e-12	MPC2/AGT/SLC7A13/SLC7A11/SLC2A14/SLC13A2/SLC22A24/SLC22A7/SLC16A4/SLC4A11/SLC6A8/MTTP/SLC23A1/CYP4A11/SLC7A8/SLC4A4/SLC26A9/SLC2A3/ABCC2/SLC7A7/SLC5A12/SLC13A3/SLC22A6/SLC47A1/ABAT/KCNJ10/ACE2/ABCC6/SFXN2/PLA2G12B/SLC1A1/CYP4F2/SLC22A12/SLC2A2/SLC16A9/CD36/SLC22A11/ANXA1/SLCO4C1/SLC2A9/CA4/SLC9A3R1/SLC44A4	43
BP	GO:0009063	cellular amino acid catabolic process	23/541	112/18800	9.71409e-14	6.15735e-11	4.81907e-11	ENOSF1/ECHS1/GOT1/HIBCH/GLS/ACAT1/HOGA1/ALDH6A1/AMDHD1/HPD/ABAT/DAO/HGD/GAD1/PRODH2/FTCD/ACADSB/KYNU/AGXT2/ACMSD/MCCC2/PIPOX/ALDH4A1	23
BP	GO:0006631	fatty acid metabolic process	41/541	395/18800	1.22504e-12	6.79438e-10	5.31764e-10	FABP3/ACOT7/PRKAA2/HADH/ACSL1/ECHDC3/PHYH/ECHS1/PTGS2/PCCB/TYRP1/ACAT1/HAO2/PCK2/ANGPTL3/CYP4A11/ACOT4/SCD5/FABP1/ACAA2/GGT1/PCCA/EHHADH/CRYL1/ACSM2B/PTGDS/CYP4F3/GSTA1/AMACR/CES2/CYP4F2/ACADSB/ACSM3/ALDH1L2/PNPLA3/CD36/ACSM2A/CYP2B6/ANXA1/SLC27A2/FABP5	41
BP	GO:0015849	organic acid transport	34/541	318/18800	4.84839e-11	2.39026e-08	1.87074e-08	FABP3/ACSL1/MPC2/AGT/SLC7A13/SLC7A11/SLC13A2/SLC23A1/CYP4A11/SLC7A8/FABP1/SLC26A9/ABCC2/SLC7A7/SLC5A12/FABP4/SLC13A3/SLC22A6/SLC47A1/ABAT/SLC6A19/KCNJ10/ACE2/SFXN2/PLA2G12B/SLC1A1/CYP4F2/APOE/CD36/ANXA1/SLC27A2/FABP5/SLC9A3R1/SLC22A4	34
BP	GO:0009636	response to toxic substance	29/541	247/18800	1.42512e-10	6.32325e-08	4.94891e-08	CLDN1/PTGS2/SLC7A11/DHRS2/BMP7/PIM1/SLC22A18/APOM/BPHL/SLC23A1/SLC7A8/SCN2B/SRD5A1/FABP1/SLC47A1/SLC22A8/AKR7A3/GSTA1/GLYAT/ALB/RDH12/INHBB/APOE/SDC1/CD36/PON1/EPHX2/SLC15A2/H19	29
BP	GO:1901606	alpha-amino acid catabolic process	18/541	94/18800	1.64167e-10	6.62189e-08	5.18265e-08	GOT1/HIBCH/GLS/ACAT1/HOGA1/ALDH6A1/HPD/DAO/HGD/GAD1/PRODH2/ACADSB/KYNU/AGXT2/ACMSD/MCCC2/PIPOX/ALDH4A1	18
BP	GO:0043648	dicarboxylic acid metabolic process	18/541	95/18800	1.97214e-10	7.29198e-08	5.70709e-08	IDH2/PHYH/SLC7A11/GOT1/GLS/HOGA1/PCK2/ACOT4/AMDHD1/GGT1/GAD1/PRODH2/ALDH1L1/FTCD/KYNU/ALDH1L2/ACMSD/ALDH4A1	18
BP	GO:0006575	cellular modified amino acid metabolic process	24/541	188/18800	1.02624e-09	3.50262e-07	2.74134e-07	GGT6/SLC7A11/GGACT/GGH/SLC6A8/HOGA1/GSTM5/GGT1/IYD/BHMT2/DIO1/GGTLC1/GSTA1/ALDH1L1/CHDH/SLC1A1/FTCD/ALDH1L2/DMGDH/DPEP1/PIPOX/ALDH4A1/FOLH1/SLC22A4	24
BP	GO:0046942	carboxylic acid transport	29/541	279/18800	2.53488e-09	8.03376e-07	6.28764e-07	MPC2/AGT/SLC7A13/SLC7A11/SLC13A2/SLC16A4/SLC6A8/SLC23A1/CYP4A11/SLC7A8/SLC26A9/ABCC2/SLC7A7/SLC5A12/SLC13A3/SLC22A6/SLC47A1/ABAT/KCNJ10/ACE2/ABCC6/SFXN2/PLA2G12B/SLC1A1/CYP4F2/SLC16A9/CD36/ANXA1/SLC9A3R1	29
BP	GO:0046394	carboxylic acid biosynthetic process	31/541	316/18800	2.90848e-09	8.40187e-07	6.57575e-07	ACOT7/PRKAA2/PTGS2/GGT6/GOT1/GLS/HOGA1/ASL/CYP4A11/ACOT4/OSBPL3/SCD5/UPB1/GGT1/PSAT1/BHMT2/ABAT/GGTLC1/GAD1/ACSM2B/PTGDS/AMACR/KYNU/ACSM3/ALDH1A2/AGXT2/ACMSD/ACSM2A/ANXA1/SLC27A2/FABP5	31
BP	GO:0098656	anion transmembrane transport	27/541	247/18800	3.02975e-09	8.40187e-07	6.57575e-07	MPC2/AGT/SLC7A13/SLC7A11/SLC13A2/SLC22A7/SLC4A11/SLC6A8/SLC12A6/SLC23A1/SLC7A8/SLC4A4/SLC34A1/SLC26A9/SLC12A3/SLC5A12/SLC13A3/SLC22A6/SLC47A1/KCNJ10/SLC22A8/ACE2/SFXN2/SLC1A1/SLC13A1/GABRB3/SLC44A4	27
BP	GO:0016053	organic acid biosynthetic process	31/541	318/18800	3.38547e-09	8.83609e-07	6.91559e-07	ACOT7/PRKAA2/PTGS2/GGT6/GOT1/GLS/HOGA1/ASL/CYP4A11/ACOT4/OSBPL3/SCD5/UPB1/GGT1/PSAT1/BHMT2/ABAT/GGTLC1/GAD1/ACSM2B/PTGDS/AMACR/KYNU/ACSM3/ALDH1A2/AGXT2/ACMSD/ACSM2A/ANXA1/SLC27A2/FABP5	31
BP	GO:0009064	glutamine family amino acid metabolic process	15/541	78/18800	5.20994e-09	1.17632e-06	9.20653e-07	SLC7A11/GOT1/GLS/ASL/GLYATL1/AMDHD1/GGT1/SLC7A7/DAO/GFPT2/GAD1/PRODH2/AGMAT/FTCD/ALDH4A1	15
BP	GO:0098739	import across plasma membrane	23/541	188/18800	5.27336e-09	1.17632e-06	9.20653e-07	ACSL1/AGT/SLC39A4/SLC7A11/KCNJ3/SLC39A5/SLC12A6/KCNJ2/SLC7A8/SLC34A1/SLC2A3/SLC2A5/SLC12A3/SLC47A1/KCNJ10/ACE2/WNK4/KCNJ15/SLC1A1/CD36/SLC15A2/SLC9A3R1/SLC22A4	23
BP	GO:0006066	alcohol metabolic process	33/541	361/18800	5.30234e-09	1.17632e-06	9.20653e-07	PRKAA2/IDH2/FMO5/GOT1/GK/ADH6/ABCG1/PCK2/ANGPTL3/IMPA2/SLC34A1/MIOX/ACAA2/DAB2/MOXD1/CH25H/IGF1/CUBN/LDLR/GPD1/SORD/HRH1/CYP27B1/PTH1R/RDH12/FGF1/BMP2/ALDH1A2/RBP4/APOE/PON1/EPHX2/DKK3	33
BP	GO:0055081	anion homeostasis	11/541	39/18800	8.17723e-09	1.72773e-06	1.35221e-06	SLC7A11/GLS/SLC12A6/SLC34A1/SLC12A3/SFRP4/TFAP2B/ABCC6/SLC1A1/CA12/SLC9A3R1	11
BP	GO:1901617	organic hydroxy compound biosynthetic process	26/541	243/18800	9.33642e-09	1.88299e-06	1.47372e-06	PRKAA2/TGFB2/SLC7A11/GPR37/GOT1/TYRP1/ABCG1/PCK2/IMPA2/OSBPL3/ACAA2/DAB2/MOXD1/CH25H/NR4A2/PSAT1/DAO/HRH1/CYP27B1/PTH1R/AMACR/FGF1/BMP2/APOE/SLC27A2/DKK3	26
BP	GO:0072329	monocarboxylic acid catabolic process	18/541	124/18800	1.68153e-08	3.24389e-06	2.53884e-06	HADH/PHYH/ECHS1/PCCB/ACAT1/HOGA1/PCK2/CYP4A11/FABP1/ACAA2/PCCA/EHHADH/CYP4F3/AMACR/CYP4F2/ALDH1L2/AGXT2/SLC27A2	18
BP	GO:0062012	regulation of small molecule metabolic process	31/541	342/18800	1.8935e-08	3.50061e-06	2.73976e-06	FABP3/PRKAA2/CLYBL/FMO5/PTGS2/SLC7A11/ABCG1/FBP1/AK4/SLC4A4/FABP1/KHK/ENTPD5/DAB2/SLC7A7/IGF1/LDLR/GPD1/HRH1/CYP27B1/PTH1R/PFKFB2/FGF1/BMP2/APOE/ACMSD/ANXA1/EPHX2/FABP5/H19/DKK3	31
BP	GO:0098657	import into cell	25/541	238/18800	2.60814e-08	4.62893e-06	3.62284e-06	FABP3/ACSL1/AGT/SLC39A4/SLC7A11/KCNJ3/SLC39A5/NEURL1B/SLC12A6/KCNJ2/SLC7A8/SLC34A1/SLC2A3/SLC2A5/SLC12A3/SLC47A1/KCNJ10/ACE2/WNK4/KCNJ15/SLC1A1/CD36/SLC27A2/SLC15A2/SLC22A4	25
BP	GO:0008202	steroid metabolic process	29/541	323/18800	6.72968e-08	1.14845e-05	8.98834e-06	PRKAA2/AGT/FMO5/DHRS2/SLC22A24/ACAT1/ABCG1/ANGPTL3/OSBPL3/CYP17A1/SRD5A1/ACAA2/DAB2/CH25H/SERPINA6/PRLR/CUBN/LDLR/CYP27B1/AMACR/FGF1/BMP2/UGT1A1/APOE/CYP2B6/PON1/SLC27A2/EPHX2/DKK3	29
BP	GO:1905039	carboxylic acid transmembrane transport	19/541	152/18800	8.01852e-08	1.29297e-05	1.01195e-05	ACSL1/MPC2/AGT/SLC7A13/SLC7A11/SLC13A2/SLC23A1/SLC7A8/SLC7A7/SLC5A12/SLC13A3/SLC47A1/SLC6A19/KCNJ10/ACE2/SFXN2/SLC1A1/CD36/SLC22A4	19
BP	GO:0030198	extracellular matrix organization	28/541	307/18800	8.1594e-08	1.29297e-05	1.01195e-05	ADAMTS18/ANGPTL7/AGT/KLK7/DDR2/TGFB2/IL6/MMP28/FLRT2/PLG/MMP16/CCDC80/OLFML2A/KLK5/ADAMTS3/MFAP4/WT1/HAS1/DPT/NID2/BMP2/ANTXR1/OLFML2B/COL11A1/WDR72/SFRP2/COL8A1/LUM	28
BP	GO:0043062	extracellular structure organization	28/541	308/18800	8.73796e-08	1.31849e-05	1.03192e-05	ADAMTS18/ANGPTL7/AGT/KLK7/DDR2/TGFB2/IL6/MMP28/FLRT2/PLG/MMP16/CCDC80/OLFML2A/KLK5/ADAMTS3/MFAP4/WT1/HAS1/DPT/NID2/BMP2/ANTXR1/OLFML2B/COL11A1/WDR72/SFRP2/COL8A1/LUM	28
BP	GO:1903825	organic acid transmembrane transport	19/541	153/18800	8.91471e-08	1.31849e-05	1.03192e-05	ACSL1/MPC2/AGT/SLC7A13/SLC7A11/SLC13A2/SLC23A1/SLC7A8/SLC7A7/SLC5A12/SLC13A3/SLC47A1/SLC6A19/KCNJ10/ACE2/SFXN2/SLC1A1/CD36/SLC22A4	19
BP	GO:0045229	external encapsulating structure organization	28/541	310/18800	1.00114e-07	1.43292e-05	1.12148e-05	ADAMTS18/ANGPTL7/AGT/KLK7/DDR2/TGFB2/IL6/MMP28/FLRT2/PLG/MMP16/CCDC80/OLFML2A/KLK5/ADAMTS3/MFAP4/WT1/HAS1/DPT/NID2/BMP2/ANTXR1/OLFML2B/COL11A1/WDR72/SFRP2/COL8A1/LUM	28
BP	GO:0072073	kidney epithelium development	18/541	140/18800	1.13956e-07	1.56017e-05	1.22107e-05	AGT/WNT2B/IRX2/BMP7/ACAT1/PECAM1/SIX2/SALL1/WT1/TFAP2B/IRX1/BASP1/AQP11/WNK4/FGF1/BMP2/PTPRO/SDC1	18
BP	GO:0072009	nephron epithelium development	16/541	111/18800	1.16037e-07	1.56017e-05	1.22107e-05	AGT/WNT2B/IRX2/ACAT1/PECAM1/SIX2/SALL1/WT1/TFAP2B/IRX1/BASP1/AQP11/WNK4/FGF1/BMP2/PTPRO	16
BP	GO:0001655	urogenital system development	30/541	352/18800	1.26408e-07	1.64962e-05	1.29108e-05	AGT/WNT2B/TGFB2/IRX2/GFRA1/BMP7/ACAT1/PECAM1/CYP4A11/SIX2/SRD5A1/SLC34A1/SALL1/PRLR/WT1/TNC/SOX17/TFAP2B/IRX1/BASP1/ANGPT2/AQP11/WNK4/FGF1/BMP2/ALDH1A2/RBP4/PTPRO/SDC1/ANXA1	30
BP	GO:0072006	nephron development	18/541	145/18800	1.95493e-07	2.42473e-05	1.89772e-05	AGT/WNT2B/IRX2/BMP7/ACAT1/PECAM1/SIX2/SALL1/WT1/TFAP2B/IRX1/BASP1/ANGPT2/AQP11/WNK4/FGF1/BMP2/PTPRO	18
BP	GO:0042219	cellular modified amino acid catabolic process	9/541	32/18800	1.96732e-07	2.42473e-05	1.89772e-05	GGACT/HOGA1/GGT1/GGTLC1/ALDH1L1/ALDH1L2/DMGDH/DPEP1/ALDH4A1	9
BP	GO:0015698	inorganic anion transport	20/541	182/18800	3.1247e-07	3.74711e-05	2.93268e-05	BSND/SLC4A11/SLC12A6/SLC4A4/SLC34A1/SLC26A9/ABCC2/SLC12A3/CLCNKB/SLC22A6/SFRP4/SLC22A8/CLCN5/CEBPB/ABCC6/WNK4/SLC1A1/SLC13A1/GABRB3/SLC22A11	20
BP	GO:0006536	glutamate metabolic process	9/541	34/18800	3.49479e-07	4.08062e-05	3.19371e-05	SLC7A11/GOT1/GLS/AMDHD1/GGT1/GAD1/PRODH2/FTCD/ALDH4A1	9
BP	GO:0016042	lipid catabolic process	27/541	327/18800	1.00364e-06	0.000114184	8.93663e-05	HADH/PHYH/ECHS1/PLD1/PCCB/ACAT1/PCK2/ANGPTL3/ENPP6/CYP4A11/SRD5A1/FABP1/ACAA2/LDLR/PCCA/EHHADH/CYP27B1/PLA2G12B/CYP4F3/AMACR/CYP4F2/ALDH1L2/PNPLA3/APOE/GBA3/SLC27A2/RARRES2	27
BP	GO:0009410	response to xenobiotic stimulus	31/541	411/18800	1.12965e-06	0.000125307	9.80719e-05	SST/PRKAA2/HADH/ACSL1/FMO5/CMBL/TGFB2/PTGS2/BPHL/FBP1/SRD5A1/SLC34A1/S100A12/ABAT/SORD/TFAP2B/ABCC6/FMO4/ACSM2B/GSTA1/CRHBP/SLC1A1/CYP4F2/GLYAT/SLC22A12/UGT1A1/FOSB/DPEP1/HNF4A/CYP2B6/SFRP2	31
BP	GO:0044106	cellular amine metabolic process	15/541	116/18800	1.2019e-06	0.00013007	0.000101799	TGFB2/SLC7A11/GPR37/MOXD1/SLC7A7/NR4A2/ABAT/DAO/AGMAT/CHDH/SLC1A1/KYNU/DMGDH/ACMSD/AOC1	15
BP	GO:0010038	response to metal ion	28/541	351/18800	1.25697e-06	0.00013279	0.000103928	PRKAA2/CLDN1/PTGS2/SYT1/CAPN3/MTTP/TNNT2/FBP1/FGG/SLC34A1/KHK/FABP4/ABAT/SORD/KCNMB2/NFATC4/CRHBP/SLC1A1/JUNB/INHBB/FOSB/SUCNR1/DPEP1/AOC1/SDC1/MAPT/NEDD4L/AQP1	28
BP	GO:0072001	renal system development	26/541	312/18800	1.3392e-06	0.000137408	0.000107543	AGT/WNT2B/TGFB2/IRX2/GFRA1/BMP7/ACAT1/PECAM1/CYP4A11/SIX2/SLC34A1/SALL1/WT1/SOX17/TFAP2B/IRX1/BASP1/ANGPT2/AQP11/WNK4/FGF1/BMP2/ALDH1A2/RBP4/PTPRO/SDC1	26
BP	GO:0046459	short-chain fatty acid metabolic process	6/541	14/18800	1.36263e-06	0.000137408	0.000107543	PHYH/PCCB/TYRP1/PCK2/ACOT4/PCCA	6
BP	GO:0045444	fat cell differentiation	22/541	237/18800	1.49391e-06	0.000147299	0.000115284	FABP3/PTGS2/IL6/BMP7/PIM1/ALDH6A1/PRDM16/KLF4/NR4A2/FABP4/MEDAG/TFAP2B/CEBPB/WIF1/ZBTB7C/PNPLA3/BMP2/INHBB/EGR2/SFRP2/RARRES2/CCDC71L	22
BP	GO:0016052	carbohydrate catabolic process	17/541	152/18800	1.87347e-06	0.000180708	0.000141432	PRKAA2/ENOSF1/GK/DHTKD1/FBP1/SLC4A4/DHDH/MIOX/ENTPD5/ALDOB/IGF1/GPD1/SORD/PFKFB2/MGAM/GBA3/FUT6	17
BP	GO:0072080	nephron tubule development	13/541	91/18800	1.97983e-06	0.000186905	0.000146281	AGT/WNT2B/IRX2/ACAT1/SIX2/SALL1/WT1/TFAP2B/IRX1/AQP11/WNK4/FGF1/BMP2	13
BP	GO:0009308	amine metabolic process	15/541	121/18800	2.06619e-06	0.000190993	0.000149481	TGFB2/SLC7A11/GPR37/MOXD1/SLC7A7/NR4A2/ABAT/DAO/AGMAT/CHDH/SLC1A1/KYNU/DMGDH/ACMSD/AOC1	15
BP	GO:0043090	amino acid import	10/541	53/18800	2.296e-06	0.000207905	0.000162718	AGT/SLC7A11/SLC7A8/SLC47A1/KCNJ10/ACE2/SFXN2/SLC1A1/SLC9A3R1/SLC22A4	10
BP	GO:0009259	ribonucleotide metabolic process	29/541	384/18800	2.44543e-06	0.000217007	0.000169841	ACOT7/PRKAA2/ACSL1/MPC2/PANK1/ACAT1/DHTKD1/FBP1/ACOT4/UPP2/AK4/UPB1/SLC4A4/ENTPD5/ALDOB/IGF1/GPD1/ACSM2B/GLYAT/PFKFB2/ACSM3/ADCY2/MCCC2/PIPOX/DPYS/ACSM2A/PDE10A/GDA/H19	29
BP	GO:0001822	kidney development	25/541	303/18800	2.55559e-06	0.000222336	0.000174012	AGT/WNT2B/TGFB2/IRX2/GFRA1/BMP7/ACAT1/PECAM1/CYP4A11/SIX2/SLC34A1/SALL1/WT1/SOX17/TFAP2B/IRX1/BASP1/ANGPT2/AQP11/WNK4/FGF1/BMP2/ALDH1A2/PTPRO/SDC1	25
BP	GO:0055088	lipid homeostasis	18/541	173/18800	2.68109e-06	0.000228769	0.000179047	FABP3/PRKAA2/MTCH2/GOT1/ABCG1/ANGPTL3/MTTP/APOM/GRAMD1B/LDLR/FABP4/PLA2G12B/ACSM3/PNPLA3/APOE/ACSM2A/HNF4A/EPHX2	18
BP	GO:0061326	renal tubule development	13/541	94/18800	2.87521e-06	0.00023302	0.000182374	AGT/WNT2B/IRX2/ACAT1/SIX2/SALL1/WT1/TFAP2B/IRX1/AQP11/WNK4/FGF1/BMP2	13
BP	GO:0030178	negative regulation of Wnt signaling pathway	18/541	174/18800	2.91209e-06	0.00023302	0.000182374	DAB2/SFRP4/SOX17/WIF1/TPBG/NFATC4/SOSTDC1/BMP2/DKK2/APOE/SOST/IGFBP6/IGFBP1/PTPRO/SFRP2/RBMS3/DKK3/SLC9A3R1	18
BP	GO:0120254	olefinic compound metabolic process	17/541	157/18800	2.93341e-06	0.00023302	0.000182374	PTGS2/ADH6/CYP4A11/CYP17A1/SRD5A1/DAB2/PTGDS/CYP4F3/GSTA1/CYP4F2/RDH12/BMP2/ALDH1A2/RBP4/CYP2B6/EPHX2/DKK3	17
BP	GO:0010817	regulation of hormone levels	34/541	496/18800	2.94576e-06	0.00023302	0.000182374	HADH/MPC2/AGT/DHRS2/IL6/TM7SF3/ADH6/PCK2/MYRIP/KLK6/SLC7A8/FGG/CYP17A1/SRD5A1/DAB2/IYD/ABAT/SCG5/DIO1/TFAP2B/ACE2/CYP27B1/CRHBP/PFKFB2/RDH12/BMP2/UGT1A1/INHBB/ALDH1A2/RBP4/ILDR1/HNF4A/ANXA1/DKK3	34
BP	GO:0045600	positive regulation of fat cell differentiation	11/541	67/18800	3.02489e-06	0.00023302	0.000182374	PTGS2/BMP7/PIM1/MEDAG/CEBPB/WIF1/ZBTB7C/BMP2/SFRP2/RARRES2/CCDC71L	11
BP	GO:0048732	gland development	31/541	431/18800	3.04601e-06	0.00023302	0.000182374	CLDN1/IGFBP5/TGFB2/IL6/BMP7/TNFAIP3/PTN/ACAT1/VDR/PCK2/UPB1/EGF/SRD5A1/NRG1/SALL1/PRLR/WT1/TNC/AREG/CEBPB/SOSTDC1/FGF1/BMP2/UGT1A1/INHBB/ALDH1A2/TDGF1/HNF4A/ANXA1/DKK3/SLC9A3R1	31
BP	GO:0042180	cellular ketone metabolic process	20/541	211/18800	3.23762e-06	0.00024348	0.00019056	FABP3/NQO2/PTGS2/SLC7A11/PDSS1/CYP17A1/SRD5A1/FABP1/DAB2/SLC7A7/GPD1/CYP4F3/CYP4F2/KYNU/BMP2/ACMSD/CYP2B6/ANXA1/FABP5/DKK3	20
BP	GO:0090090	negative regulation of canonical Wnt signaling pathway	16/541	142/18800	3.39991e-06	0.000251423	0.000196777	DAB2/SFRP4/SOX17/TPBG/SOSTDC1/BMP2/DKK2/APOE/SOST/IGFBP6/IGFBP1/PTPRO/SFRP2/RBMS3/DKK3/SLC9A3R1	16
BP	GO:0019693	ribose phosphate metabolic process	29/541	394/18800	4.05531e-06	0.000294974	0.000230862	ACOT7/PRKAA2/ACSL1/MPC2/PANK1/ACAT1/DHTKD1/FBP1/ACOT4/UPP2/AK4/UPB1/SLC4A4/ENTPD5/ALDOB/IGF1/GPD1/ACSM2B/GLYAT/PFKFB2/ACSM3/ADCY2/MCCC2/PIPOX/DPYS/ACSM2A/PDE10A/GDA/H19	29
BP	GO:0042632	cholesterol homeostasis	13/541	98/18800	4.61904e-06	0.00033056	0.000258714	FABP3/ABCG1/ANGPTL3/MTTP/APOM/GRAMD1B/LDLR/FABP4/PLA2G12B/ACSM3/APOE/HNF4A/EPHX2	13
BP	GO:0055092	sterol homeostasis	13/541	99/18800	5.1798e-06	0.000364806	0.000285516	FABP3/ABCG1/ANGPTL3/MTTP/APOM/GRAMD1B/LDLR/FABP4/PLA2G12B/ACSM3/APOE/HNF4A/EPHX2	13
BP	GO:0009117	nucleotide metabolic process	33/541	487/18800	5.26417e-06	0.000364955	0.000285633	ACOT7/PRKAA2/ACSL1/MPC2/NAMPT/PANK1/ACAT1/DHTKD1/FBP1/ACOT4/UPP2/AK4/UPB1/SLC4A4/ENTPD5/ALDOB/IGF1/ENPP3/GPD1/ACSM2B/GLYAT/KYNU/PFKFB2/ACSM3/ADCY2/ACMSD/MCCC2/PIPOX/DPYS/ACSM2A/PDE10A/GDA/H19	33
BP	GO:0010232	vascular transport	12/541	87/18800	7.10794e-06	0.000476297	0.000372775	SLC7A8/SLC4A4/SLC2A3/ABCC2/SLC13A3/SLC22A8/SLC1A1/APOE/CD36/SLC15A2/FABP5/SLC9A3R1	12
BP	GO:0150104	transport across blood-brain barrier	12/541	87/18800	7.10794e-06	0.000476297	0.000372775	SLC7A8/SLC4A4/SLC2A3/ABCC2/SLC13A3/SLC22A8/SLC1A1/APOE/CD36/SLC15A2/FABP5/SLC9A3R1	12
BP	GO:0009062	fatty acid catabolic process	13/541	102/18800	7.23975e-06	0.000476297	0.000372775	HADH/PHYH/ECHS1/PCCB/ACAT1/PCK2/FABP1/ACAA2/PCCA/EHHADH/AMACR/ALDH1L2/SLC27A2	13
BP	GO:0071466	cellular response to xenobiotic stimulus	17/541	168/18800	7.36585e-06	0.000476297	0.000372775	PRKAA2/ACSL1/FMO5/CMBL/BPHL/FBP1/S100A12/FMO4/ACSM2B/GSTA1/CRHBP/CYP4F2/GLYAT/UGT1A1/DPEP1/HNF4A/CYP2B6	17
BP	GO:0006753	nucleoside phosphate metabolic process	33/541	495/18800	7.40691e-06	0.000476297	0.000372775	ACOT7/PRKAA2/ACSL1/MPC2/NAMPT/PANK1/ACAT1/DHTKD1/FBP1/ACOT4/UPP2/AK4/UPB1/SLC4A4/ENTPD5/ALDOB/IGF1/ENPP3/GPD1/ACSM2B/GLYAT/KYNU/PFKFB2/ACSM3/ADCY2/ACMSD/MCCC2/PIPOX/DPYS/ACSM2A/PDE10A/GDA/H19	33
BP	GO:1901568	fatty acid derivative metabolic process	11/541	74/18800	8.20454e-06	0.000520051	0.000407019	ACOT7/ACSL1/GGT6/TYRP1/ACAT1/CYP4A11/GGT1/GGTLC1/CYP4F3/CYP4F2/ACSM2A	11
BP	GO:0061008	hepaticobiliary system development	15/541	137/18800	9.74122e-06	0.000608758	0.000476446	CLDN1/IL6/TNFAIP3/PTN/ACAT1/PCK2/UPB1/SRD5A1/SOX17/CEBPB/FGF1/UGT1A1/ALDH1A2/HNF4A/ANXA1	15
BP	GO:0006576	cellular biogenic amine metabolic process	13/541	105/18800	9.99097e-06	0.000615693	0.000481874	TGFB2/GPR37/MOXD1/NR4A2/ABAT/DAO/AGMAT/CHDH/SLC1A1/KYNU/DMGDH/ACMSD/AOC1	13
BP	GO:0006090	pyruvate metabolic process	13/541	106/18800	1.10934e-05	0.000665155	0.000520586	PRKAA2/MPC2/HOGA1/PCK2/DHTKD1/FBP1/SLC4A4/ENTPD5/PC/ALDOB/IGF1/GPD1/PFKFB2	13
BP	GO:0019395	fatty acid oxidation	13/541	106/18800	1.10934e-05	0.000665155	0.000520586	FABP3/HADH/PHYH/ECHS1/ACAT1/HAO2/FABP1/ACAA2/EHHADH/AMACR/CYP4F2/ALDH1L2/SLC27A2	13
BP	GO:0072028	nephron morphogenesis	11/541	77/18800	1.2134e-05	0.000717849	0.000561827	AGT/WNT2B/IRX2/BMP7/SIX2/SALL1/WT1/IRX1/WNK4/FGF1/BMP2	11
BP	GO:0006805	xenobiotic metabolic process	13/541	108/18800	1.36237e-05	0.000794391	0.000621733	ACSL1/FMO5/CMBL/BPHL/S100A12/FMO4/ACSM2B/GSTA1/CYP4F2/GLYAT/UGT1A1/HNF4A/CYP2B6	13
BP	GO:0001503	ossification	29/541	420/18800	1.37859e-05	0.000794391	0.000621733	SATB2/IGFBP5/DDR2/TGFB2/PTGS2/IL6/BMP7/PTN/CHRDL1/RASSF2/MMP16/SIX2/SLC34A1/OMD/IGF1/TNC/AREG/CEBPB/CYP27B1/PTH1R/JUNB/CLEC3B/NELL1/BMP2/FGFR3/SOST/EGR2/COL11A1/SFRP2	29
BP	GO:0060993	kidney morphogenesis	12/541	93/18800	1.4278e-05	0.000812199	0.00063567	AGT/WNT2B/IRX2/BMP7/SIX2/SALL1/WT1/IRX1/BASP1/WNK4/FGF1/BMP2	12
BP	GO:0050819	negative regulation of coagulation	9/541	52/18800	1.54612e-05	0.000850358	0.000665535	ADAMTS18/PLG/KNG1/FGG/ABAT/HRG/APOH/APOE/PROCR	9
BP	GO:1902930	regulation of alcohol biosynthetic process	9/541	52/18800	1.54612e-05	0.000850358	0.000665535	ABCG1/DAB2/HRH1/CYP27B1/PTH1R/FGF1/BMP2/APOE/DKK3	9
BP	GO:0060326	cell chemotaxis	24/541	315/18800	1.55238e-05	0.000850358	0.000665535	CXCL1/TGFB2/CXCL2/IL6/PTN/MMP28/CXCL8/CXCL3/CH25H/S100A12/ACKR4/HRG/HRH1/CCL14/TPBG/CCL15/EGR3/FGF1/PRKCQ/PTPRO/ANXA1/CCL2/DEFA1/RARRES2	24
BP	GO:0046165	alcohol biosynthetic process	15/541	143/18800	1.63769e-05	0.00088615	0.000693548	PRKAA2/GOT1/ABCG1/PCK2/IMPA2/ACAA2/DAB2/MOXD1/HRH1/CYP27B1/PTH1R/FGF1/BMP2/APOE/DKK3	15
BP	GO:0015909	long-chain fatty acid transport	10/541	66/18800	1.77692e-05	0.000949905	0.000743446	FABP3/ACSL1/FABP1/FABP4/PLA2G12B/APOE/CD36/ANXA1/SLC27A2/FABP5	10
BP	GO:0050878	regulation of body fluid levels	27/541	382/18800	1.80183e-05	0.000951753	0.000744892	ADAMTS18/CLDN1/SLC7A11/IL6/VWF/VDR/PLG/CYP4A11/KNG1/PLAUR/FGG/PRLR/ABAT/TFPI2/TFAP2B/HRG/WNK4/CYP4F2/APOH/PRKCQ/APOE/PTPRO/CD36/PROCR/HNF4A/AQP1/SLC22A4	27
BP	GO:0034440	lipid oxidation	13/541	112/18800	2.02452e-05	0.00103358	0.000808933	FABP3/HADH/PHYH/ECHS1/ACAT1/HAO2/FABP1/ACAA2/EHHADH/AMACR/CYP4F2/ALDH1L2/SLC27A2	13
BP	GO:0006000	fructose metabolic process	5/541	13/18800	2.05866e-05	0.00103358	0.000808933	FBP1/KHK/ALDOB/SORD/PFKFB2	5
BP	GO:0055062	phosphate ion homeostasis	5/541	13/18800	2.05866e-05	0.00103358	0.000808933	SLC34A1/SFRP4/TFAP2B/ABCC6/SLC9A3R1	5
BP	GO:0072506	trivalent inorganic anion homeostasis	5/541	13/18800	2.05866e-05	0.00103358	0.000808933	SLC34A1/SFRP4/TFAP2B/ABCC6/SLC9A3R1	5
BP	GO:0009083	branched-chain amino acid catabolic process	6/541	21/18800	2.07321e-05	0.00103358	0.000808933	ECHS1/HIBCH/ACAT1/ALDH6A1/ACADSB/MCCC2	6
BP	GO:0009150	purine ribonucleotide metabolic process	26/541	366/18800	2.35613e-05	0.00116157	0.000909107	ACOT7/PRKAA2/ACSL1/MPC2/PANK1/ACAT1/DHTKD1/FBP1/ACOT4/AK4/SLC4A4/ENTPD5/ALDOB/IGF1/GPD1/ACSM2B/GLYAT/PFKFB2/ACSM3/ADCY2/MCCC2/PIPOX/ACSM2A/PDE10A/GDA/H19	26
BP	GO:0003014	renal system process	13/541	114/18800	2.45064e-05	0.00119489	0.000935182	AGT/CYP4A11/SLC22A6/TFAP2B/GSN/WNK4/CYP4F2/SLC22A12/SUCNR1/PTPRO/SLC15A2/AQP1/SLC9A3R1	13
BP	GO:0003018	vascular process in circulatory system	21/541	263/18800	2.62719e-05	0.00126705	0.000991657	AGT/PTGS2/CLDN5/KNG1/SLC7A8/SLC4A4/FGG/SLC2A3/ABCC2/SLC13A3/SLC22A8/HRH1/ACE2/KCNMB2/SLC1A1/APOE/CD36/AKAP12/SLC15A2/FABP5/SLC9A3R1	21
BP	GO:0015908	fatty acid transport	12/541	99/18800	2.71007e-05	0.00128173	0.00100315	FABP3/ACSL1/CYP4A11/FABP1/FABP4/PLA2G12B/CYP4F2/APOE/CD36/ANXA1/SLC27A2/FABP5	12
BP	GO:0006869	lipid transport	27/541	391/18800	2.7154e-05	0.00128173	0.00100315	FABP3/ACSL1/AGT/SLC22A24/ABCG1/MTTP/LPA/APOM/CYP4A11/OSBPL3/FABP1/ABCC2/DAB2/GRAMD1B/LDLR/FABP4/PLA2G12B/SERPINA5/CLU/CYP4F2/APOH/RBP4/APOE/CD36/ANXA1/SLC27A2/FABP5	27
BP	GO:0098754	detoxification	15/541	150/18800	2.89399e-05	0.00135164	0.00105787	PTGS2/BMP7/PIM1/SLC22A18/APOM/FABP1/SLC47A1/AKR7A3/GSTA1/ALB/RDH12/APOE/CD36/SLC15A2/H19	15
BP	GO:0003333	amino acid transmembrane transport	12/541	100/18800	3.00054e-05	0.00138681	0.00108539	AGT/SLC7A13/SLC7A11/SLC7A8/SLC7A7/SLC47A1/SLC6A19/KCNJ10/ACE2/SFXN2/SLC1A1/SLC22A4	12
BP	GO:0042886	amide transport	22/541	287/18800	3.17844e-05	0.00145389	0.00113789	HADH/MPC2/SLC7A11/IL6/TM7SF3/PCK2/MYRIP/MTTP/FGG/SLC13A3/SLC47A1/ABAT/TFAP2B/CRHBP/PFKFB2/INHBB/RBP4/ILDR1/HNF4A/ANXA1/SLC15A2/SLC9A3R1	22
BP	GO:0001889	liver development	14/541	134/18800	3.26024e-05	0.00147609	0.00115527	CLDN1/IL6/TNFAIP3/PTN/ACAT1/PCK2/UPB1/SRD5A1/CEBPB/FGF1/UGT1A1/ALDH1A2/HNF4A/ANXA1	14
BP	GO:0050818	regulation of coagulation	10/541	71/18800	3.4195e-05	0.00153256	0.00119946	ADAMTS18/PLG/KNG1/FGG/ABAT/HRG/APOH/APOE/CD36/PROCR	10
BP	GO:0006814	sodium ion transport	20/541	249/18800	3.7403e-05	0.00163793	0.00128193	SLC13A2/SLC4A11/SLC6A8/SLC23A1/SLC4A4/SCN2B/SLC34A1/SCN7A/SLC12A3/SLC5A12/SLC13A3/SLC6A19/SLC5A10/WNK4/SLC13A1/PRSS8/SLC5A9/NEDD4L/SLC9A3R1/SLC22A4	20
BP	GO:0015833	peptide transport	20/541	249/18800	3.7403e-05	0.00163793	0.00128193	HADH/MPC2/SLC7A11/IL6/TM7SF3/PCK2/MYRIP/FGG/SLC13A3/ABAT/TFAP2B/CRHBP/PFKFB2/INHBB/RBP4/ILDR1/HNF4A/ANXA1/SLC15A2/SLC9A3R1	20
BP	GO:0089718	amino acid import across plasma membrane	8/541	45/18800	3.76535e-05	0.00163793	0.00128193	AGT/SLC7A11/SLC7A8/SLC47A1/KCNJ10/ACE2/SLC1A1/SLC22A4	8
BP	GO:0072078	nephron tubule morphogenesis	10/541	72/18800	3.87026e-05	0.00166722	0.00130485	AGT/WNT2B/IRX2/SIX2/SALL1/WT1/IRX1/WNK4/FGF1/BMP2	10
BP	GO:0071248	cellular response to metal ion	17/541	191/18800	3.9394e-05	0.00168069	0.00131539	PRKAA2/CLDN1/PTGS2/SYT1/CAPN3/FBP1/SLC34A1/FABP4/NFATC4/CRHBP/SLC1A1/JUNB/INHBB/FOSB/DPEP1/AOC1/AQP1	17
BP	GO:0060070	canonical Wnt signaling pathway	23/541	313/18800	4.10095e-05	0.00172529	0.0013503	WNT2B/KLF4/EGF/DAB2/NR4A2/SFRP4/SOX17/TPBG/SOSTDC1/BMP2/DKK2/APOE/SOST/IGFBP6/IGFBP1/PTPRO/SDC1/SFRP2/RBMS3/DKK3/RSPO1/GPC5/SLC9A3R1	23
BP	GO:0010876	lipid localization	29/541	446/18800	4.1606e-05	0.00172529	0.0013503	FABP3/ACSL1/AGT/IL6/SLC22A24/ABCG1/ANGPTL3/MTTP/LPA/APOM/CYP4A11/OSBPL3/FABP1/ABCC2/DAB2/GRAMD1B/LDLR/FABP4/PLA2G12B/SERPINA5/CLU/CYP4F2/APOH/RBP4/APOE/CD36/ANXA1/SLC27A2/FABP5	29
BP	GO:0031667	response to nutrient levels	29/541	446/18800	4.1606e-05	0.00172529	0.0013503	SST/PRKAA2/ACSL1/WNT2B/SLC39A4/PTGS2/BMP7/SLC39A5/PIM1/ACAT1/VDR/PCK2/SRD5A1/SLC34A1/LDLR/SLC6A19/SORD/CYP27B1/IFI16/ALB/DAPL1/KYNU/UGT1A1/INHBB/ALDH1A2/APOE/AOC1/PON1/SFRP2	29
BP	GO:0046883	regulation of hormone secretion	19/541	231/18800	4.21352e-05	0.00173105	0.00135481	HADH/MPC2/AGT/IL6/TM7SF3/PCK2/MYRIP/FGG/DAB2/ABAT/SCG5/TFAP2B/CRHBP/PFKFB2/INHBB/RBP4/ILDR1/HNF4A/ANXA1	19
BP	GO:1990000	amyloid fibril formation	7/541	34/18800	4.30339e-05	0.00175176	0.00137102	NAT8B/LDLR/GSN/CLU/APOE/CD36/MAPT	7
BP	GO:0019218	regulation of steroid metabolic process	12/541	104/18800	4.44993e-05	0.00179494	0.00140482	AGT/FMO5/ABCG1/DAB2/LDLR/CYP27B1/FGF1/BMP2/UGT1A1/APOE/EPHX2/DKK3	12
BP	GO:0006690	icosanoid metabolic process	13/541	121/18800	4.62198e-05	0.00184754	0.00144598	PTGS2/GGT6/CYP4A11/GGT1/GGTLC1/PTGDS/CYP4F3/GSTA1/CES2/CYP4F2/CYP2B6/ANXA1/FABP5	13
BP	GO:0006694	steroid biosynthetic process	16/541	175/18800	4.77778e-05	0.00187607	0.00146831	PRKAA2/ABCG1/OSBPL3/CYP17A1/SRD5A1/ACAA2/DAB2/CH25H/PRLR/CYP27B1/AMACR/FGF1/BMP2/APOE/SLC27A2/DKK3	16
BP	GO:0043567	regulation of insulin-like growth factor receptor signaling pathway	6/541	24/18800	4.7779e-05	0.00187607	0.00146831	IGFBP5/IGF1/IGFBP3/BMP2/IGFBP6/IGFBP1	6
BP	GO:0051591	response to cAMP	11/541	89/18800	4.86109e-05	0.00188706	0.00147691	IGFBP5/SRD5A1/WT1/GPD1/AREG/KCNE1/CRHBP/INHBB/FOSB/SDC1/AQP1	11
BP	GO:0072088	nephron epithelium morphogenesis	10/541	74/18800	4.92554e-05	0.00188706	0.00147691	AGT/WNT2B/IRX2/SIX2/SALL1/WT1/IRX1/WNK4/FGF1/BMP2	10
BP	GO:0046434	organophosphate catabolic process	15/541	157/18800	4.93349e-05	0.00188706	0.00147691	ACOT7/ACAT1/ANGPTL3/IMPA2/ENPP6/UPP2/UPB1/ENTPD5/ENPP3/LDLR/GPD1/DPYS/PDE10A/PON1/GDA	15
BP	GO:0035633	maintenance of blood-brain barrier	7/541	35/18800	5.24687e-05	0.0019879	0.00155583	CLDN1/PTGS2/IL6/CLDN5/PECAM1/JAM2/SLC1A1	7
BP	GO:0016055	Wnt signaling pathway	29/541	452/18800	5.28672e-05	0.0019879	0.00155583	PRKAA2/WNT2B/TNFAIP3/CPZ/KLF4/EGF/SALL1/DAB2/NR4A2/SFRP4/SOX17/WIF1/TPBG/NFATC4/SOSTDC1/BMP2/DKK2/APOE/SOST/IGFBP6/IGFBP1/PTPRO/SDC1/SFRP2/RBMS3/DKK3/RSPO1/GPC5/SLC9A3R1	29
BP	GO:0022612	gland morphogenesis	13/541	123/18800	5.49034e-05	0.00204711	0.00160218	IGFBP5/TGFB2/IL6/BMP7/TNFAIP3/PTN/VDR/TNC/AREG/CEBPB/SOSTDC1/FGF1/SLC9A3R1	13
BP	GO:0198738	cell-cell signaling by wnt	29/541	454/18800	5.71921e-05	0.00211468	0.00165506	PRKAA2/WNT2B/TNFAIP3/CPZ/KLF4/EGF/SALL1/DAB2/NR4A2/SFRP4/SOX17/WIF1/TPBG/NFATC4/SOSTDC1/BMP2/DKK2/APOE/SOST/IGFBP6/IGFBP1/PTPRO/SDC1/SFRP2/RBMS3/DKK3/RSPO1/GPC5/SLC9A3R1	29
BP	GO:0030195	negative regulation of blood coagulation	8/541	48/18800	6.11102e-05	0.00220669	0.00172707	ADAMTS18/PLG/KNG1/FGG/ABAT/HRG/APOH/APOE	8
BP	GO:0009991	response to extracellular stimulus	30/541	479/18800	6.12376e-05	0.00220669	0.00172707	SST/PRKAA2/ACSL1/WNT2B/SLC39A4/PTGS2/BMP7/SLC39A5/PIM1/ACAT1/VDR/PCK2/SRD5A1/SLC34A1/NR4A2/LDLR/SLC6A19/SORD/CYP27B1/IFI16/ALB/DAPL1/KYNU/UGT1A1/INHBB/ALDH1A2/APOE/AOC1/PON1/SFRP2	30
BP	GO:0009081	branched-chain amino acid metabolic process	6/541	25/18800	6.13469e-05	0.00220669	0.00172707	ECHS1/HIBCH/ACAT1/ALDH6A1/ACADSB/MCCC2	6
BP	GO:0008652	cellular amino acid biosynthetic process	10/541	76/18800	6.21673e-05	0.00220669	0.00172707	GOT1/GLS/ASL/UPB1/GGT1/PSAT1/BHMT2/ABAT/GAD1/AGXT2	10
BP	GO:0061333	renal tubule morphogenesis	10/541	76/18800	6.21673e-05	0.00220669	0.00172707	AGT/WNT2B/IRX2/SIX2/SALL1/WT1/IRX1/WNK4/FGF1/BMP2	10
BP	GO:0044242	cellular lipid catabolic process	18/541	219/18800	6.72671e-05	0.00236876	0.00185392	HADH/PHYH/ECHS1/PCCB/ACAT1/PCK2/ANGPTL3/ENPP6/FABP1/ACAA2/LDLR/PCCA/EHHADH/AMACR/ALDH1L2/PNPLA3/GBA3/SLC27A2	18
BP	GO:0050873	brown fat cell differentiation	8/541	49/18800	7.12152e-05	0.00246861	0.00193206	FABP3/PTGS2/BMP7/PIM1/ALDH6A1/PRDM16/FABP4/CEBPB	8
BP	GO:1900047	negative regulation of hemostasis	8/541	49/18800	7.12152e-05	0.00246861	0.00193206	ADAMTS18/PLG/KNG1/FGG/ABAT/HRG/APOH/APOE	8
BP	GO:0051592	response to calcium ion	14/541	144/18800	7.22726e-05	0.00248584	0.00194555	PRKAA2/SYT1/CAPN3/MTTP/TNNT2/FGG/KCNMB2/CRHBP/JUNB/INHBB/FOSB/SUCNR1/DPEP1/SDC1	14
BP	GO:0007596	blood coagulation	18/541	221/18800	7.56465e-05	0.00258187	0.00202071	ADAMTS18/SLC7A11/IL6/VWF/PLG/KNG1/PLAUR/FGG/ABAT/TFPI2/HRG/CYP4F2/APOH/PRKCQ/APOE/CD36/PROCR/HNF4A	18
BP	GO:0048009	insulin-like growth factor receptor signaling pathway	7/541	37/18800	7.64292e-05	0.00258867	0.00202603	IGFBP5/IGF1/PIK3R1/IGFBP3/BMP2/IGFBP6/IGFBP1	7
BP	GO:1901616	organic hydroxy compound catabolic process	10/541	78/18800	7.78511e-05	0.00259978	0.00203473	GK/IMPA2/CYP4A11/MIOX/MOXD1/SORD/CYP27B1/CYP4F3/CYP4F2/APOE	10
BP	GO:0006865	amino acid transport	14/541	145/18800	7.7929e-05	0.00259978	0.00203473	AGT/SLC7A13/SLC7A11/SLC7A8/SLC7A7/SLC47A1/ABAT/SLC6A19/KCNJ10/ACE2/SFXN2/SLC1A1/SLC9A3R1/SLC22A4	14
BP	GO:0006163	purine nucleotide metabolic process	26/541	394/18800	8.09678e-05	0.002681	0.00209829	ACOT7/PRKAA2/ACSL1/MPC2/PANK1/ACAT1/DHTKD1/FBP1/ACOT4/AK4/SLC4A4/ENTPD5/ALDOB/IGF1/GPD1/ACSM2B/GLYAT/PFKFB2/ACSM3/ADCY2/MCCC2/PIPOX/ACSM2A/PDE10A/GDA/H19	26
BP	GO:0016485	protein processing	19/541	243/18800	8.33915e-05	0.00273942	0.00214402	CYFIP2/CARD16/CPZ/TMPRSS2/KLK6/MMP16/FGG/GGT1/ADAMTS3/S100A10/SCG5/CPXM1/ACE2/GSN/IFI16/KLK1/CLEC3B/APOH/GAS1	19
BP	GO:0062013	positive regulation of small molecule metabolic process	14/541	146/18800	8.39669e-05	0.00273942	0.00214402	PRKAA2/CLYBL/PTGS2/ABCG1/SLC4A4/FABP1/ENTPD5/DAB2/IGF1/GPD1/HRH1/PTH1R/FGF1/ANXA1	14
BP	GO:0001676	long-chain fatty acid metabolic process	12/541	111/18800	8.46403e-05	0.00274123	0.00214544	ACOT7/ACSL1/PTGS2/CYP4A11/ACOT4/PTGDS/CYP4F3/GSTA1/CYP4F2/PNPLA3/CYP2B6/SLC27A2	12
BP	GO:0006970	response to osmotic stress	10/541	79/18800	8.68755e-05	0.00279324	0.00218614	SST/EFHD1/CLDN1/PTGS2/CAPN3/SLC4A11/SLC12A6/MARVELD3/SORD/AQP1	10
BP	GO:1901569	fatty acid derivative catabolic process	5/541	17/18800	8.99584e-05	0.00287155	0.00224743	ACOT7/ACAT1/CYP4A11/CYP4F3/CYP4F2	5
BP	GO:1903034	regulation of response to wounding	15/541	166/18800	9.34019e-05	0.00296017	0.00231679	ADAMTS18/CLDN1/VIL1/TNFAIP3/PTN/PLG/KNG1/KLF4/FGG/ABAT/HRG/APOH/APOE/CD36/ANXA1	15
BP	GO:0044703	multi-organism reproductive process	17/541	205/18800	9.53849e-05	0.00300158	0.0023492	AGT/IGFBP5/PNOC/PTGS2/PTN/TAC1/VDR/HAVCR2/PRLR/ACE2/CYP27B1/ANGPT2/A1CF/MAFF/CRHBP/JUNB/FOSB	17
BP	GO:0009065	glutamine family amino acid catabolic process	6/541	27/18800	9.76418e-05	0.00305096	0.00238784	GOT1/GLS/DAO/GAD1/PRODH2/ALDH4A1	6
BP	GO:0018958	phenol-containing compound metabolic process	12/541	113/18800	0.000100694	0.0031045	0.00242975	TGFB2/SLC7A11/GPR37/TYRP1/SRD5A1/MOXD1/NR4A2/IYD/ABAT/DAO/DIO1/SLC1A1	12
BP	GO:0050817	coagulation	18/541	226/18800	0.000100755	0.0031045	0.00242975	ADAMTS18/SLC7A11/IL6/VWF/PLG/KNG1/PLAUR/FGG/ABAT/TFPI2/HRG/CYP4F2/APOH/PRKCQ/APOE/CD36/PROCR/HNF4A	18
BP	GO:1902652	secondary alcohol metabolic process	14/541	149/18800	0.000104588	0.00320041	0.00250481	PRKAA2/IDH2/FMO5/ABCG1/ANGPTL3/ACAA2/CH25H/CUBN/LDLR/CYP27B1/FGF1/APOE/PON1/EPHX2	14
BP	GO:0034219	carbohydrate transmembrane transport	13/541	131/18800	0.000105377	0.00320244	0.0025064	SLC2A14/SLC23A1/SLC2A3/SLC2A5/IGF1/PIK3R1/AQP11/SLC5A10/SLC2A2/SLC5A9/SLC2A9/FABP5/AQP1	13
BP	GO:0007599	hemostasis	18/541	227/18800	0.000106576	0.00321686	0.00251769	ADAMTS18/SLC7A11/IL6/VWF/PLG/KNG1/PLAUR/FGG/ABAT/TFPI2/HRG/CYP4F2/APOH/PRKCQ/APOE/CD36/PROCR/HNF4A	18
BP	GO:0030193	regulation of blood coagulation	9/541	66/18800	0.000108859	0.0032512	0.00254457	ADAMTS18/PLG/KNG1/FGG/ABAT/HRG/APOH/APOE/CD36	9
BP	GO:0015850	organic hydroxy compound transport	19/541	248/18800	0.00010918	0.0032512	0.00254457	AGT/SYT1/SLC22A24/ABCG1/MTTP/APOM/OSBPL3/ABCC2/DAB2/GRAMD1B/LDLR/SLC5A12/ABAT/AQP11/CLU/RBP4/APOE/CD36/AQP1	19
BP	GO:0030111	regulation of Wnt signaling pathway	23/541	336/18800	0.000120284	0.00352015	0.00275506	TNFAIP3/EGF/SALL1/DAB2/SFRP4/SOX17/WIF1/TPBG/NFATC4/SOSTDC1/BMP2/DKK2/APOE/SOST/IGFBP6/IGFBP1/PTPRO/SFRP2/RBMS3/DKK3/RSPO1/GPC5/SLC9A3R1	23
BP	GO:0006760	folic acid-containing compound metabolic process	6/541	28/18800	0.000121271	0.00352015	0.00275506	GGH/ALDH1L1/FTCD/ALDH1L2/PIPOX/FOLH1	6
BP	GO:0043649	dicarboxylic acid catabolic process	5/541	18/18800	0.000121621	0.00352015	0.00275506	GOT1/ACOT4/GAD1/ALDH1L1/ALDH1L2	5
BP	GO:0031214	biomineral tissue development	15/541	170/18800	0.000122104	0.00352015	0.00275506	DDR2/PTGS2/BMP7/PTN/OMD/IGF1/CEBPB/CYP27B1/PTH1R/ENAM/CLEC3B/NELL1/BMP2/FGFR3/WDR72	15
BP	GO:1902475	L-alpha-amino acid transmembrane transport	9/541	67/18800	0.000122592	0.00352015	0.00275506	AGT/SLC7A13/SLC7A11/SLC7A8/SLC7A7/SLC47A1/KCNJ10/ACE2/SLC1A1	9
BP	GO:0061041	regulation of wound healing	13/541	133/18800	0.000122971	0.00352015	0.00275506	ADAMTS18/CLDN1/VIL1/TNFAIP3/PLG/KNG1/FGG/ABAT/HRG/APOH/APOE/CD36/ANXA1	13
BP	GO:0042060	wound healing	27/541	429/18800	0.000130704	0.00371751	0.00290952	ADAMTS18/CLDN1/TGFB2/SLC7A11/IL6/VIL1/TNFAIP3/VWF/PLG/KNG1/PLAUR/FGG/NRG1/IGF1/ABAT/TFPI2/HRG/CYP4F2/FGF1/APOH/PRKCQ/APOE/SDC1/CD36/PROCR/HNF4A/ANXA1	27
BP	GO:1900046	regulation of hemostasis	9/541	68/18800	0.000137745	0.00389282	0.00304673	ADAMTS18/PLG/KNG1/FGG/ABAT/HRG/APOH/APOE/CD36	9
BP	GO:0110148	biomineralization	15/541	172/18800	0.000139135	0.00390723	0.00305801	DDR2/PTGS2/BMP7/PTN/OMD/IGF1/CEBPB/CYP27B1/PTH1R/ENAM/CLEC3B/NELL1/BMP2/FGFR3/WDR72	15
BP	GO:0071320	cellular response to cAMP	8/541	54/18800	0.000144857	0.00401706	0.00314396	IGFBP5/SRD5A1/WT1/GPD1/KCNE1/CRHBP/INHBB/AQP1	8
BP	GO:0072348	sulfur compound transport	8/541	54/18800	0.000144857	0.00401706	0.00314396	SLC7A13/SLC7A11/SLC26A9/SLC13A3/SLC1A1/SLC13A1/SLC9A3R1/SLC44A4	8
BP	GO:0097530	granulocyte migration	14/541	154/18800	0.000148774	0.00410006	0.00320892	CXCL1/TGFB2/CXCL2/PECAM1/CXCL8/UMOD/CXCL3/S100A12/HRH1/CCL14/CCL15/ANXA1/CCL2/RARRES2	14
BP	GO:0060249	anatomical structure homeostasis	22/541	319/18800	0.00015105	0.00413709	0.0032379	CLDN1/PTGS2/IL6/TNFAIP3/CAPN3/NELL2/CLDN5/PECAM1/AZGP1/PLG/JAM2/PBLD/CUBN/PTH1R/SLC1A1/ALB/NAPSA/RDH12/USH1C/RBP4/ILDR1/LCA5	22
BP	GO:0044706	multi-multicellular organism process	17/541	213/18800	0.000152015	0.00413799	0.00323861	AGT/IGFBP5/PNOC/PTGS2/PTN/TAC1/VDR/HAVCR2/PRLR/ACE2/CYP27B1/ANGPT2/A1CF/MAFF/CRHBP/JUNB/FOSB	17
BP	GO:0015807	L-amino acid transport	9/541	69/18800	0.00015443	0.00417808	0.00326999	AGT/SLC7A13/SLC7A11/SLC7A8/SLC7A7/SLC47A1/KCNJ10/ACE2/SLC1A1	9
BP	GO:2000117	negative regulation of cysteine-type endopeptidase activity	10/541	85/18800	0.000161787	0.00435061	0.00340502	CARD16/PTGS2/VIL1/PLAUR/KLF4/FABP1/IFI16/DPEP1/SFRP2/AQP1	10
BP	GO:0072330	monocarboxylic acid biosynthetic process	17/541	215/18800	0.000170101	0.00453043	0.00354576	ACOT7/PRKAA2/PTGS2/HOGA1/ACOT4/OSBPL3/SCD5/ACSM2B/PTGDS/AMACR/ACSM3/ALDH1A2/ACMSD/ACSM2A/ANXA1/SLC27A2/FABP5	17
BP	GO:0008643	carbohydrate transport	14/541	156/18800	0.000170517	0.00453043	0.00354576	VIL1/SLC2A14/SLC23A1/SLC2A3/SLC2A5/IGF1/PIK3R1/AQP11/SLC5A10/SLC2A2/SLC5A9/SLC2A9/FABP5/AQP1	14
BP	GO:0051047	positive regulation of secretion	21/541	300/18800	0.000172885	0.00456313	0.00357135	MPC2/AGT/TGFB2/TM7SF3/SYT1/ABCG1/PCK2/MYRIP/CYP4A11/FGG/DAB2/IGF1/ABAT/CYP4F2/PFKFB2/BMP2/INHBB/RBP4/ILDR1/SDC1/AQP1	21
BP	GO:0030595	leukocyte chemotaxis	18/541	236/18800	0.000173804	0.00456313	0.00357135	CXCL1/TGFB2/CXCL2/IL6/PTN/MMP28/CXCL8/CXCL3/CH25H/S100A12/HRH1/CCL14/CCL15/PTPRO/ANXA1/CCL2/DEFA1/RARRES2	18
BP	GO:0042417	dopamine metabolic process	7/541	42/18800	0.000176866	0.00461619	0.00361288	TGFB2/GPR37/MOXD1/NR4A2/ABAT/DAO/SLC1A1	7
BP	GO:0030258	lipid modification	17/541	216/18800	0.000179828	0.00466606	0.00365191	FABP3/HADH/AGT/PHYH/ECHS1/ACAT1/ABCG1/HAO2/FABP1/ACAA2/EHHADH/AMACR/CYP4F2/ALDH1L2/APOE/SLC27A2/EPHX2	17
BP	GO:0055067	monovalent inorganic cation homeostasis	14/541	157/18800	0.00018238	0.00470478	0.00368221	AGT/SLC12A6/CYP4A11/KCNJ2/SLC4A4/ATP6V0D2/SCN7A/SLC12A3/KCNJ10/TFAP2B/AQP11/CYP4F2/RHCG/NEDD4L	14
BP	GO:0071472	cellular response to salt stress	4/541	11/18800	0.000190499	0.00485797	0.0038021	EFHD1/CAPN3/SLC12A6/AQP1	4
BP	GO:0090276	regulation of peptide hormone secretion	15/541	177/18800	0.000191024	0.00485797	0.0038021	HADH/MPC2/IL6/TM7SF3/PCK2/MYRIP/FGG/ABAT/TFAP2B/CRHBP/PFKFB2/INHBB/RBP4/ILDR1/HNF4A	15
BP	GO:0051384	response to glucocorticoid	13/541	139/18800	0.000191766	0.00485797	0.0038021	CLDN1/SLIT3/PTGS2/GOT1/IL6/PCK2/SRD5A1/AREG/UGT1A1/FOSB/SDC1/ANXA1/AQP1	13
BP	GO:0072521	purine-containing compound metabolic process	26/541	416/18800	0.00019342	0.00485797	0.0038021	ACOT7/PRKAA2/ACSL1/MPC2/PANK1/ACAT1/DHTKD1/FBP1/ACOT4/AK4/SLC4A4/ENTPD5/ALDOB/IGF1/GPD1/ACSM2B/GLYAT/PFKFB2/ACSM3/ADCY2/MCCC2/PIPOX/ACSM2A/PDE10A/GDA/H19	26
BP	GO:0030282	bone mineralization	12/541	121/18800	0.000193793	0.00485797	0.0038021	DDR2/PTGS2/BMP7/PTN/OMD/IGF1/CYP27B1/PTH1R/CLEC3B/NELL1/BMP2/FGFR3	12
BP	GO:0022600	digestive system process	11/541	104/18800	0.00020157	0.00502453	0.00393246	PTGER3/VIL1/VDR/FABP1/PBLD/SLC2A5/LDLR/WNK4/RBP4/CD36/AQP1	11
BP	GO:0050727	regulation of inflammatory response	25/541	394/18800	0.000202979	0.00503139	0.00393783	AGT/PTGER3/PTGS2/IL6/TNFAIP3/SOCS3/DNASE1/LRFN5/KLF4/NFKBIZ/GGT1/S100A12/IGF1/ENPP3/LDLR/FABP4/IL33/ACE2/CEBPB/LRRC19/APOE/SUCNR1/BCL6/ANXA1/TSLP	25
BP	GO:1904407	positive regulation of nitric oxide metabolic process	7/541	43/18800	0.000206076	0.00507976	0.00397569	AGT/TMEM106A/PTGS2/KLF4/CLU/AGXT2/CD36	7
BP	GO:0045821	positive regulation of glycolytic process	5/541	20/18800	0.000209834	0.00514382	0.00402583	PRKAA2/SLC4A4/ENTPD5/IGF1/GPD1	5
BP	GO:0060828	regulation of canonical Wnt signaling pathway	19/541	261/18800	0.000211803	0.00516357	0.00404129	EGF/DAB2/SFRP4/SOX17/TPBG/SOSTDC1/BMP2/DKK2/APOE/SOST/IGFBP6/IGFBP1/PTPRO/SFRP2/RBMS3/DKK3/RSPO1/GPC5/SLC9A3R1	19
BP	GO:0046456	icosanoid biosynthetic process	8/541	57/18800	0.00021333	0.00517237	0.00404817	PTGS2/GGT6/CYP4A11/GGT1/GGTLC1/PTGDS/ANXA1/FABP5	8
BP	GO:1901652	response to peptide	29/541	491/18800	0.000221144	0.00533269	0.00417364	HADH/ECHDC3/AGT/IGFBP5/PTGS2/ICAM1/GOT1/BMP7/TNFAIP3/SOCS3/PCK2/FBP1/SRD5A1/SLC34A1/KHK/IGF1/NR4A2/PIK3R1/AREG/CRHBP/SLC22A12/PNPLA3/INHBB/PRKCQ/IGFBP1/CD36/ANXA1/EGR2/RARRES2	29
BP	GO:0002791	regulation of peptide secretion	15/541	180/18800	0.000229595	0.00550656	0.00430973	HADH/MPC2/IL6/TM7SF3/PCK2/MYRIP/FGG/ABAT/TFAP2B/CRHBP/PFKFB2/INHBB/RBP4/ILDR1/HNF4A	15
BP	GO:0071241	cellular response to inorganic substance	17/541	221/18800	0.000236102	0.00563081	0.00440697	PRKAA2/CLDN1/PTGS2/SYT1/CAPN3/FBP1/SLC34A1/FABP4/NFATC4/CRHBP/SLC1A1/JUNB/INHBB/FOSB/DPEP1/AOC1/AQP1	17
BP	GO:0001656	metanephros development	10/541	89/18800	0.000237314	0.00563081	0.00440697	IRX2/BMP7/ACAT1/SIX2/SALL1/WT1/SOX17/TFAP2B/IRX1/BASP1	10
BP	GO:0060135	maternal process involved in female pregnancy	8/541	58/18800	0.000241319	0.00569538	0.00445751	PTGS2/PTN/VDR/HAVCR2/ACE2/CYP27B1/ANGPT2/JUNB	8
BP	GO:0046683	response to organophosphorus	12/541	124/18800	0.00024397	0.00572748	0.00448263	IGFBP5/PTGS2/SRD5A1/WT1/GPD1/AREG/KCNE1/CRHBP/INHBB/FOSB/SDC1/AQP1	12
BP	GO:0046031	ADP metabolic process	10/541	90/18800	0.000260232	0.00604578	0.00473175	PRKAA2/DHTKD1/FBP1/AK4/SLC4A4/ENTPD5/ALDOB/IGF1/GPD1/PFKFB2	10
BP	GO:0033865	nucleoside bisphosphate metabolic process	12/541	125/18800	0.000262978	0.00604578	0.00473175	ACOT7/ACSL1/MPC2/PANK1/ACAT1/ACOT4/ACSM2B/GLYAT/ACSM3/MCCC2/PIPOX/ACSM2A	12
BP	GO:0033875	ribonucleoside bisphosphate metabolic process	12/541	125/18800	0.000262978	0.00604578	0.00473175	ACOT7/ACSL1/MPC2/PANK1/ACAT1/ACOT4/ACSM2B/GLYAT/ACSM3/MCCC2/PIPOX/ACSM2A	12
BP	GO:0034032	purine nucleoside bisphosphate metabolic process	12/541	125/18800	0.000262978	0.00604578	0.00473175	ACOT7/ACSL1/MPC2/PANK1/ACAT1/ACOT4/ACSM2B/GLYAT/ACSM3/MCCC2/PIPOX/ACSM2A	12
BP	GO:0072337	modified amino acid transport	6/541	32/18800	0.000264568	0.00605097	0.00473581	SLC7A13/SLC7A11/SLC6A8/SLC13A3/SLC9A3R1/SLC22A4	6
BP	GO:0019400	alditol metabolic process	5/541	21/18800	0.000268928	0.00611914	0.00478917	GOT1/GK/PCK2/ANGPTL3/SORD	5
BP	GO:0090087	regulation of peptide transport	15/541	183/18800	0.000274719	0.00618841	0.00484338	HADH/MPC2/IL6/TM7SF3/PCK2/MYRIP/FGG/ABAT/TFAP2B/CRHBP/PFKFB2/INHBB/RBP4/ILDR1/HNF4A	15
BP	GO:0032892	positive regulation of organic acid transport	7/541	45/18800	0.000276156	0.00618841	0.00484338	FABP3/ACSL1/AGT/CYP4A11/ABAT/ACE2/CYP4F2	7
BP	GO:0051180	vitamin transport	7/541	45/18800	0.000276156	0.00618841	0.00484338	SLC2A14/SLC23A1/SLC2A3/CUBN/AFM/SLC2A2/SLC44A4	7
BP	GO:0042416	dopamine biosynthetic process	4/541	12/18800	0.000279261	0.00622655	0.00487323	TGFB2/GPR37/NR4A2/DAO	4
BP	GO:0006835	dicarboxylic acid transport	10/541	91/18800	0.000284974	0.00632216	0.00494806	SLC7A13/SLC7A11/SLC13A2/SLC26A9/ABCC2/SLC13A3/SLC22A6/ABAT/KCNJ10/SLC1A1	10
BP	GO:0043434	response to peptide hormone	25/541	404/18800	0.000296711	0.00653829	0.00511721	HADH/ECHDC3/AGT/IGFBP5/PTGS2/GOT1/BMP7/SOCS3/PCK2/FBP1/SRD5A1/SLC34A1/KHK/NR4A2/PIK3R1/AREG/CRHBP/SLC22A12/PNPLA3/INHBB/PRKCQ/IGFBP1/ANXA1/EGR2/RARRES2	25
BP	GO:0009914	hormone transport	20/541	290/18800	0.000297664	0.00653829	0.00511721	HADH/MPC2/AGT/IL6/TM7SF3/PCK2/MYRIP/SLC7A8/FGG/DAB2/ABAT/SCG5/TFAP2B/CRHBP/PFKFB2/INHBB/RBP4/ILDR1/HNF4A/ANXA1	20
BP	GO:0070371	ERK1 and ERK2 cascade	22/541	335/18800	0.00030042	0.00656631	0.00513915	FAM83D/AGT/ICAM1/HAVCR2/EGF/FGG/NRG1/DAB2/IGF1/ACE2/CCL14/GLIPR2/TPBG/CCL15/FGF1/BMP2/FGFR3/APOE/CD36/CCL2/AKAP12/SLC9A3R1	22
BP	GO:0007565	female pregnancy	15/541	185/18800	0.00030888	0.00671814	0.00525798	AGT/IGFBP5/PNOC/PTGS2/PTN/VDR/HAVCR2/PRLR/ACE2/CYP27B1/ANGPT2/A1CF/CRHBP/JUNB/FOSB	15
BP	GO:0048566	embryonic digestive tract development	6/541	33/18800	0.000315575	0.00683028	0.00534574	TGFB2/CXCL8/SIX2/SALL1/ALDH1A2/RARRES2	6
BP	GO:0006635	fatty acid beta-oxidation	9/541	76/18800	0.000324995	0.00700001	0.00547858	HADH/ECHS1/ACAT1/FABP1/ACAA2/EHHADH/AMACR/ALDH1L2/SLC27A2	9
BP	GO:0071621	granulocyte chemotaxis	12/541	128/18800	0.000327729	0.00702479	0.00549797	CXCL1/TGFB2/CXCL2/CXCL8/CXCL3/S100A12/HRH1/CCL14/CCL15/ANXA1/CCL2/RARRES2	12
BP	GO:0050900	leukocyte migration	24/541	384/18800	0.0003373	0.00705742	0.00552351	ADD2/CXCL1/TGFB2/CXCL2/ICAM1/IL6/PTN/MMP28/PECAM1/CXCL8/PLG/JAM2/UMOD/CXCL3/CH25H/S100A12/HRH1/CCL14/CCL15/PTPRO/ANXA1/CCL2/DEFA1/RARRES2	24
BP	GO:0009713	catechol-containing compound biosynthetic process	5/541	22/18800	0.000339843	0.00705742	0.00552351	TGFB2/GPR37/MOXD1/NR4A2/DAO	5
BP	GO:0042423	catecholamine biosynthetic process	5/541	22/18800	0.000339843	0.00705742	0.00552351	TGFB2/GPR37/MOXD1/NR4A2/DAO	5
BP	GO:0072574	hepatocyte proliferation	5/541	22/18800	0.000339843	0.00705742	0.00552351	IL6/TNFAIP3/PTN/CEBPB/FGF1	5
BP	GO:0072575	epithelial cell proliferation involved in liver morphogenesis	5/541	22/18800	0.000339843	0.00705742	0.00552351	IL6/TNFAIP3/PTN/CEBPB/FGF1	5
BP	GO:0006637	acyl-CoA metabolic process	10/541	93/18800	0.000340385	0.00705742	0.00552351	ACOT7/ACSL1/MPC2/ACAT1/ACOT4/ACSM2B/GLYAT/ACSM3/PIPOX/ACSM2A	10
BP	GO:0035383	thioester metabolic process	10/541	93/18800	0.000340385	0.00705742	0.00552351	ACOT7/ACSL1/MPC2/ACAT1/ACOT4/ACSM2B/GLYAT/ACSM3/PIPOX/ACSM2A	10
BP	GO:0001667	ameboidal-type cell migration	28/541	480/18800	0.000345142	0.00712276	0.00557465	PAK3/AGT/DDR2/TGFB2/PTGS2/BMP7/VIL1/PTN/S100P/KLF4/EGF/MARVELD3/HAS1/DCN/SOX17/HRG/ANGPT2/GLIPR2/NRP2/TPBG/EGR3/FGF1/APOH/RAB25/TDGF1/APOE/ANXA1/AKAP12	28
BP	GO:0006790	sulfur compound metabolic process	22/541	339/18800	0.000353739	0.00726639	0.00568706	ACOT7/ACSL1/MPC2/GGT6/SLC7A11/ACAT1/MSRA/ACOT4/GSTM5/GGT1/BHMT2/DCN/GGTLC1/ACSM2B/GSTA1/SLC1A1/GLYAT/ACSM3/ST3GAL6/DPEP1/PIPOX/ACSM2A	22
BP	GO:0001894	tissue homeostasis	19/541	272/18800	0.000356689	0.00726923	0.00568929	CLDN1/PTGS2/IL6/TNFAIP3/CLDN5/PECAM1/AZGP1/JAM2/PBLD/CUBN/PTH1R/SLC1A1/ALB/NAPSA/RDH12/USH1C/RBP4/ILDR1/LCA5	19
BP	GO:0097529	myeloid leukocyte migration	17/541	229/18800	0.000358055	0.00726923	0.00568929	CXCL1/TGFB2/CXCL2/IL6/MMP28/PECAM1/CXCL8/UMOD/CXCL3/S100A12/HRH1/CCL14/CCL15/PTPRO/ANXA1/CCL2/RARRES2	17
BP	GO:0043154	negative regulation of cysteine-type endopeptidase activity involved in apoptotic process	9/541	77/18800	0.000358792	0.00726923	0.00568929	CARD16/PTGS2/VIL1/PLAUR/KLF4/FABP1/DPEP1/SFRP2/AQP1	9
BP	GO:0046189	phenol-containing compound biosynthetic process	7/541	47/18800	0.000364212	0.00734549	0.00574897	TGFB2/SLC7A11/GPR37/TYRP1/MOXD1/NR4A2/DAO	7
BP	GO:0010951	negative regulation of endopeptidase activity	18/541	251/18800	0.000369369	0.00737482	0.00577193	AGT/CARD16/PTGS2/VIL1/LPA/KNG1/PLAUR/KLF4/FABP1/SERPINA6/TFPI2/HRG/SERPINA5/IFI16/SLPI/DPEP1/SFRP2/AQP1	18
BP	GO:0001657	ureteric bud development	10/541	94/18800	0.000371293	0.00737482	0.00577193	AGT/WNT2B/BMP7/SIX2/SALL1/WT1/BASP1/FGF1/BMP2/SDC1	10
BP	GO:0015918	sterol transport	10/541	94/18800	0.000371293	0.00737482	0.00577193	SLC22A24/ABCG1/MTTP/APOM/OSBPL3/GRAMD1B/LDLR/CLU/APOE/CD36	10
BP	GO:0006691	leukotriene metabolic process	6/541	34/18800	0.000373977	0.00737482	0.00577193	GGT6/CYP4A11/GGT1/GGTLC1/CYP4F3/CYP4F2	6
BP	GO:0033238	regulation of cellular amine metabolic process	6/541	34/18800	0.000373977	0.00737482	0.00577193	SLC7A11/GPR37/SLC7A7/NR4A2/ABAT/ACMSD	6
BP	GO:0042445	hormone metabolic process	17/541	230/18800	0.000376588	0.00739345	0.00578651	DHRS2/ADH6/KLK6/CYP17A1/SRD5A1/DAB2/IYD/SCG5/DIO1/ACE2/CYP27B1/RDH12/BMP2/UGT1A1/ALDH1A2/RBP4/DKK3	17
BP	GO:0032530	regulation of microvillus organization	4/541	13/18800	0.000394228	0.00767188	0.00600442	PLD1/VIL1/CDHR5/USH1C	4
BP	GO:0046415	urate metabolic process	4/541	13/18800	0.000394228	0.00767188	0.00600442	SLC22A12/SLC16A9/SLC22A11/SLC2A9	4
BP	GO:0061458	reproductive system development	26/541	436/18800	0.000399218	0.00773506	0.00605387	WNT2B/SLIT3/TGFB2/PTGS2/GFRA1/BMP7/PTN/SOCS3/VDR/PLG/SRD5A1/SALL1/PRLR/WT1/TNC/PLEKHA5/BASP1/CEBPB/CYP27B1/JUNB/INHBB/RBP4/KRT19/SDC1/ANXA1/SFRP2	26
BP	GO:0072163	mesonephric epithelium development	10/541	95/18800	0.000404502	0.00774623	0.00606261	AGT/WNT2B/BMP7/SIX2/SALL1/WT1/BASP1/FGF1/BMP2/SDC1	10
BP	GO:0072164	mesonephric tubule development	10/541	95/18800	0.000404502	0.00774623	0.00606261	AGT/WNT2B/BMP7/SIX2/SALL1/WT1/BASP1/FGF1/BMP2/SDC1	10
BP	GO:0007584	response to nutrient	13/541	150/18800	0.000405031	0.00774623	0.00606261	SST/ACSL1/PTGS2/BMP7/PIM1/VDR/SLC34A1/SLC6A19/CYP27B1/KYNU/UGT1A1/ALDH1A2/SFRP2	13
BP	GO:0010543	regulation of platelet activation	7/541	48/18800	0.000415961	0.0078909	0.00617584	ADAMTS18/IL6/FGG/ABAT/HRG/PRKCQ/APOE	7
BP	GO:0002274	myeloid leukocyte activation	17/541	232/18800	0.000416153	0.0078909	0.00617584	TMEM106A/DHRS2/IL6/DNASE1/CXCL8/LRFN5/HAVCR2/S100A12/ENPP3/LDLR/IL33/PTGDS/CLU/SUCNR1/ANXA1/MAPT/TSLP	17
BP	GO:0046697	decidualization	5/541	23/18800	0.000424043	0.00797237	0.0062396	PTGS2/PTN/VDR/CYP27B1/JUNB	5
BP	GO:0072576	liver morphogenesis	5/541	23/18800	0.000424043	0.00797237	0.0062396	IL6/TNFAIP3/PTN/CEBPB/FGF1	5
BP	GO:0061844	antimicrobial humoral immune response mediated by antimicrobial peptide	9/541	79/18800	0.000435109	0.0081459	0.00637542	KLK7/CXCL1/CXCL2/CXCL8/CXCL3/KLK5/S100A12/HRG/DEFA1	9
BP	GO:0034110	regulation of homotypic cell-cell adhesion	6/541	35/18800	0.000440496	0.00817774	0.00640033	ADAMTS18/IL6/PLAUR/FGG/ABAT/PRKCQ	6
BP	GO:0042558	pteridine-containing compound metabolic process	6/541	35/18800	0.000440496	0.00817774	0.00640033	GGH/ALDH1L1/FTCD/ALDH1L2/PIPOX/FOLH1	6
BP	GO:1903793	positive regulation of anion transport	7/541	49/18800	0.000473418	0.00875232	0.00685003	AGT/CYP4A11/SLC34A1/ABAT/ACE2/CEBPB/CYP4F2	7
BP	GO:0031638	zymogen activation	8/541	64/18800	0.000479312	0.00882451	0.00690653	CYFIP2/FGG/GGT1/S100A10/IFI16/KLK1/CLEC3B/APOH	8
BP	GO:0033559	unsaturated fatty acid metabolic process	11/541	115/18800	0.000484447	0.00884564	0.00692307	PTGS2/CYP4A11/SCD5/PTGDS/CYP4F3/GSTA1/CES2/CYP4F2/CYP2B6/ANXA1/FABP5	11
BP	GO:1990748	cellular detoxification	11/541	115/18800	0.000484447	0.00884564	0.00692307	PTGS2/BMP7/PIM1/APOM/FABP1/GSTA1/ALB/RDH12/APOE/CD36/H19	11
BP	GO:0048754	branching morphogenesis of an epithelial tube	13/541	153/18800	0.000489929	0.00888297	0.00695228	AGT/WNT2B/BMP7/VDR/EGF/SIX2/SALL1/WT1/AREG/NFATC4/FGF1/BMP2/SFRP2	13
BP	GO:0032103	positive regulation of response to external stimulus	26/541	442/18800	0.000490495	0.00888297	0.00695228	PAK3/AGT/PTGER3/KLK7/PTGS2/TRIM6/IL6/PTN/CXCL8/PLG/HAVCR2/NFKBIZ/KLK5/S100A12/LDLR/FABP4/IL33/HRG/CEBPB/TPBG/IFI16/COCH/APOH/SUCNR1/TSLP/RARRES2	26
BP	GO:0014074	response to purine-containing compound	12/541	134/18800	0.000498322	0.00898802	0.0070345	IGFBP5/PTGS2/SRD5A1/WT1/GPD1/AREG/KCNE1/CRHBP/INHBB/FOSB/SDC1/AQP1	12
BP	GO:0019751	polyol metabolic process	11/541	116/18800	0.000521615	0.0093052	0.00728275	GOT1/GK/PCK2/ANGPTL3/IMPA2/SLC34A1/MIOX/SORD/HRH1/CYP27B1/PTH1R	11
BP	GO:0032528	microvillus organization	5/541	24/18800	0.00052306	0.0093052	0.00728275	PLD1/VIL1/CDHR5/USH1C/SLC9A3R1	5
BP	GO:0006096	glycolytic process	9/541	81/18800	0.000524296	0.0093052	0.00728275	PRKAA2/DHTKD1/FBP1/SLC4A4/ENTPD5/ALDOB/IGF1/GPD1/PFKFB2	9
BP	GO:0045445	myoblast differentiation	9/541	81/18800	0.000524296	0.0093052	0.00728275	CAPN3/PLG/NRG1/IGF1/IGFBP3/SOSTDC1/CDON/SDC1/BOC	9
BP	GO:0006749	glutathione metabolic process	8/541	65/18800	0.000533049	0.00931273	0.00728864	GGT6/SLC7A11/GSTM5/GGT1/GGTLC1/GSTA1/SLC1A1/DPEP1	8
BP	GO:0007588	excretion	8/541	65/18800	0.000533049	0.00931273	0.00728864	AGT/SLC22A18/CLCNKB/SLC22A6/CLCN5/SLC22A12/NEDD4L/SLC9A3R1	8
BP	GO:0046879	hormone secretion	19/541	281/18800	0.000533053	0.00931273	0.00728864	HADH/MPC2/AGT/IL6/TM7SF3/PCK2/MYRIP/FGG/DAB2/ABAT/SCG5/TFAP2B/CRHBP/PFKFB2/INHBB/RBP4/ILDR1/HNF4A/ANXA1	19
BP	GO:1990573	potassium ion import across plasma membrane	7/541	50/18800	0.000537028	0.00931273	0.00728864	KCNJ3/SLC12A6/KCNJ2/SLC12A3/KCNJ10/WNK4/KCNJ15	7
BP	GO:0009159	deoxyribonucleoside monophosphate catabolic process	4/541	14/18800	0.000539412	0.00931273	0.00728864	UPP2/UPB1/DPYS/GDA	4
BP	GO:0042182	ketone catabolic process	4/541	14/18800	0.000539412	0.00931273	0.00728864	NQO2/CYP4F3/CYP4F2/KYNU	4
BP	GO:0043650	dicarboxylic acid biosynthetic process	4/541	14/18800	0.000539412	0.00931273	0.00728864	GOT1/GLS/KYNU/ACMSD	4
BP	GO:0006091	generation of precursor metabolites and energy	28/541	494/18800	0.000543627	0.00931302	0.00728886	NQO2/PRKAA2/IDH2/DHRS2/TYRP1/MTFR1/ADH6/ACAT1/DHTKD1/PRDM16/FBP1/AK4/SLC4A4/SRD5A1/KHK/ENTPD5/PPP1R1A/ALDOB/IGF1/GPD1/GFPT2/AKR7A3/ALDH1L1/NFATC4/PFKFB2/ALDH1L2/DMGDH/ALDH4A1	28
BP	GO:1901361	organic cyclic compound catabolic process	28/541	494/18800	0.000543627	0.00931302	0.00728886	ACOT7/IL6/CPEB3/ACAT1/ALDH6A1/DNASE1/UPP2/UPB1/SRD5A1/ENTPD5/ABCC2/MOXD1/ENPP3/HPD/HGD/AKR7A3/CYP27B1/A1CF/ALDH1L1/KYNU/ALDH1L2/UGT1A1/APOE/ACMSD/DPYS/PDE10A/EPHX2/GDA	28
BP	GO:0001823	mesonephros development	10/541	99/18800	0.000563074	0.00957226	0.00749176	AGT/WNT2B/BMP7/SIX2/SALL1/WT1/BASP1/FGF1/BMP2/SDC1	10
BP	GO:0006165	nucleoside diphosphate phosphorylation	10/541	99/18800	0.000563074	0.00957226	0.00749176	PRKAA2/DHTKD1/FBP1/AK4/SLC4A4/ENTPD5/ALDOB/IGF1/GPD1/PFKFB2	10
BP	GO:0035592	establishment of protein localization to extracellular region	22/541	351/18800	0.00056656	0.00959476	0.00750937	HADH/MPC2/TGFB2/IL6/TM7SF3/ABCG1/PCK2/MYRIP/MTTP/FGG/IGF1/AFM/ABAT/TFAP2B/PFKFB2/INHBB/RBP4/APOE/LTBP2/SUCNR1/HNF4A/ANXA1	22
BP	GO:0006757	ATP generation from ADP	9/541	82/18800	0.000574209	0.00965062	0.00755309	PRKAA2/DHTKD1/FBP1/SLC4A4/ENTPD5/ALDOB/IGF1/GPD1/PFKFB2	9
BP	GO:1901292	nucleoside phosphate catabolic process	9/541	82/18800	0.000574209	0.00965062	0.00755309	ACOT7/ACAT1/UPP2/UPB1/ENTPD5/ENPP3/DPYS/PDE10A/GDA	9
BP	GO:0005996	monosaccharide metabolic process	18/541	261/18800	0.000587455	0.00983599	0.00769817	DCXR/PCK2/FBP1/SLC23A1/KHK/DHDH/SLC2A3/PC/ALDOB/IGF1/GPD1/OTOGL/SORD/TFAP2B/PFKFB2/RBP4/FABP5/FUT6	18
BP	GO:0006081	cellular aldehyde metabolic process	8/541	66/18800	0.000591558	0.00986745	0.00772279	IDH2/HOGA1/DAB2/AKR7A3/BMP2/ALDH1A2/AGXT2/DKK3	8
BP	GO:0008207	C21-steroid hormone metabolic process	6/541	37/18800	0.000600945	0.00994821	0.007786	DHRS2/CYP17A1/SRD5A1/DAB2/BMP2/DKK3	6
BP	GO:0090181	regulation of cholesterol metabolic process	6/541	37/18800	0.000600945	0.00994821	0.007786	FMO5/ABCG1/LDLR/FGF1/APOE/EPHX2	6
BP	GO:0030278	regulation of ossification	11/541	118/18800	0.000603126	0.00994821	0.007786	DDR2/TGFB2/BMP7/PTN/SIX2/OMD/CYP27B1/NELL1/BMP2/SOST/EGR2	11
BP	GO:0007586	digestion	12/541	137/18800	0.000608412	0.00998523	0.00781497	SST/PTGER3/VIL1/VDR/FABP1/PBLD/SLC2A5/LDLR/WNK4/RBP4/CD36/AQP1	12
BP	GO:0046939	nucleotide phosphorylation	10/541	100/18800	0.000609871	0.00998523	0.00781497	PRKAA2/DHTKD1/FBP1/AK4/SLC4A4/ENTPD5/ALDOB/IGF1/GPD1/PFKFB2	10
BP	GO:0010466	negative regulation of peptidase activity	18/541	262/18800	0.000614385	0.0100222	0.00784387	AGT/CARD16/PTGS2/VIL1/LPA/KNG1/PLAUR/KLF4/FABP1/SERPINA6/TFPI2/HRG/SERPINA5/IFI16/SLPI/DPEP1/SFRP2/AQP1	18
BP	GO:0001659	temperature homeostasis	14/541	177/18800	0.000621465	0.0101005	0.0079052	HADH/ACSL1/PTGER3/PTGS2/PRDM16/PLCL1/PRLR/FABP4/ABAT/ESRRG/CEBPB/ZNF423/CD36/FABP5	14
BP	GO:0031960	response to corticosteroid	13/541	157/18800	0.000626188	0.0101401	0.0079362	CLDN1/SLIT3/PTGS2/GOT1/IL6/PCK2/SRD5A1/AREG/UGT1A1/FOSB/SDC1/ANXA1/AQP1	13
BP	GO:0003071	renal system process involved in regulation of systemic arterial blood pressure	5/541	25/18800	0.000638488	0.0103017	0.00806267	AGT/CYP4A11/CYP4F2/SUCNR1/PTPRO	5
BP	GO:0015749	monosaccharide transmembrane transport	11/541	119/18800	0.000647701	0.0104125	0.00814938	SLC2A14/SLC23A1/SLC2A3/SLC2A5/IGF1/PIK3R1/SLC5A10/SLC2A2/SLC5A9/SLC2A9/FABP5	11
BP	GO:0030072	peptide hormone secretion	16/541	220/18800	0.000660574	0.010543	0.00825154	HADH/MPC2/IL6/TM7SF3/PCK2/MYRIP/FGG/ABAT/TFAP2B/CRHBP/PFKFB2/INHBB/RBP4/ILDR1/HNF4A/ANXA1	16
BP	GO:0070374	positive regulation of ERK1 and ERK2 cascade	16/541	220/18800	0.000660574	0.010543	0.00825154	ICAM1/HAVCR2/FGG/NRG1/IGF1/CCL14/GLIPR2/TPBG/CCL15/FGF1/BMP2/FGFR3/APOE/CD36/CCL2/AKAP12	16
BP	GO:0062197	cellular response to chemical stress	21/541	332/18800	0.00066703	0.010571	0.00827342	EFHD1/PRKAA2/PTGS2/SLC7A11/GPR37/DHRS2/IL6/BMP7/TNFAIP3/CAPN3/SLC4A11/MSRA/SLC12A6/FABP1/NR4A2/SLC1A1/CD36/ANXA1/MAPT/AQP1/H19	21
BP	GO:0001763	morphogenesis of a branching structure	15/541	199/18800	0.00066709	0.010571	0.00827342	AGT/WNT2B/BMP7/SOCS3/VDR/EGF/SIX2/SALL1/WT1/AREG/NFATC4/FGF1/BMP2/TDGF1/SFRP2	15
BP	GO:0044262	cellular carbohydrate metabolic process	19/541	287/18800	0.00068877	0.0108757	0.00851191	IDH2/ENOSF1/GOT1/GK/PCK2/ANGPTL3/IMPA2/FBP1/KHK/MIOX/PPP1R1A/IGF1/HAS1/SORD/HRH1/PTH1R/PFKFB2/MGAM/GBA3	19
BP	GO:0008203	cholesterol metabolic process	12/541	139/18800	0.000692602	0.0108974	0.00852891	PRKAA2/FMO5/ABCG1/ANGPTL3/ACAA2/CH25H/CUBN/LDLR/FGF1/APOE/PON1/EPHX2	12
BP	GO:0055091	phospholipid homeostasis	4/541	15/18800	0.000718911	0.0112714	0.0088216	FABP3/ABCG1/ANGPTL3/HNF4A	4
BP	GO:0070372	regulation of ERK1 and ERK2 cascade	20/541	311/18800	0.000723892	0.0113095	0.00885145	FAM83D/ICAM1/HAVCR2/FGG/NRG1/DAB2/IGF1/ACE2/CCL14/GLIPR2/TPBG/CCL15/FGF1/BMP2/FGFR3/APOE/CD36/CCL2/AKAP12/SLC9A3R1	20
BP	GO:0031349	positive regulation of defense response	19/541	289/18800	0.000748723	0.0116564	0.00912294	PAK3/AGT/PTGER3/KLK7/PTGS2/TRIM6/IL6/HAVCR2/NFKBIZ/KLK5/S100A12/LDLR/FABP4/IL33/CEBPB/IFI16/COCH/SUCNR1/TSLP	19
BP	GO:0071692	protein localization to extracellular region	22/541	359/18800	0.000763892	0.0117798	0.00921953	HADH/MPC2/TGFB2/IL6/TM7SF3/ABCG1/PCK2/MYRIP/MTTP/FGG/IGF1/AFM/ABAT/TFAP2B/PFKFB2/INHBB/RBP4/APOE/LTBP2/SUCNR1/HNF4A/ANXA1	22
BP	GO:0010718	positive regulation of epithelial to mesenchymal transition	7/541	53/18800	0.000769495	0.0117798	0.00921953	TGFB2/IL6/BMP7/OLFM1/DAB2/GLIPR2/BMP2	7
BP	GO:0009135	purine nucleoside diphosphate metabolic process	10/541	103/18800	0.000769925	0.0117798	0.00921953	PRKAA2/DHTKD1/FBP1/AK4/SLC4A4/ENTPD5/ALDOB/IGF1/GPD1/PFKFB2	10
BP	GO:0009179	purine ribonucleoside diphosphate metabolic process	10/541	103/18800	0.000769925	0.0117798	0.00921953	PRKAA2/DHTKD1/FBP1/AK4/SLC4A4/ENTPD5/ALDOB/IGF1/GPD1/PFKFB2	10
BP	GO:0035282	segmentation	10/541	103/18800	0.000769925	0.0117798	0.00921953	IRX2/WT1/IRX1/BASP1/NRP2/DMRT2/ALDH1A2/TDGF1/EGR2/SFRP2	10
BP	GO:0010632	regulation of epithelial cell migration	19/541	290/18800	0.000780347	0.0118983	0.00931223	AGT/TGFB2/PTGS2/VIL1/PTN/KLF4/EGF/MARVELD3/DCN/HRG/ANGPT2/GLIPR2/NRP2/FGF1/APOH/RAB25/TDGF1/APOE/ANXA1	19
BP	GO:0019730	antimicrobial humoral response	11/541	122/18800	0.000798189	0.0120832	0.00945697	KLK7/CXCL1/CXCL2/CXCL8/CXCL3/KLK5/S100A12/HRG/SLPI/DEFA1/RARRES2	11
BP	GO:0046887	positive regulation of hormone secretion	11/541	122/18800	0.000798189	0.0120832	0.00945697	MPC2/TM7SF3/PCK2/MYRIP/FGG/DAB2/ABAT/PFKFB2/INHBB/RBP4/ILDR1	11
BP	GO:0042401	cellular biogenic amine biosynthetic process	6/541	39/18800	0.000803369	0.0120832	0.00945697	TGFB2/GPR37/MOXD1/NR4A2/DAO/AGMAT	6
BP	GO:0071470	cellular response to osmotic stress	6/541	39/18800	0.000803369	0.0120832	0.00945697	EFHD1/PTGS2/CAPN3/SLC4A11/SLC12A6/AQP1	6
BP	GO:0051604	protein maturation	20/541	314/18800	0.000815185	0.0122003	0.00954858	CYFIP2/CARD16/CPZ/TMPRSS2/KLK6/MMP16/FGG/GGT1/TSPAN5/ADAMTS3/S100A10/SCG5/CPXM1/ACE2/GSN/IFI16/KLK1/CLEC3B/APOH/GAS1	20
BP	GO:0048608	reproductive structure development	25/541	433/18800	0.000816651	0.0122003	0.00954858	WNT2B/SLIT3/TGFB2/PTGS2/GFRA1/BMP7/PTN/SOCS3/VDR/PLG/SRD5A1/SALL1/PRLR/WT1/TNC/BASP1/CEBPB/CYP27B1/JUNB/INHBB/RBP4/KRT19/SDC1/ANXA1/SFRP2	25
BP	GO:0045598	regulation of fat cell differentiation	12/541	142/18800	0.000837034	0.0124628	0.00975406	PTGS2/IL6/BMP7/PIM1/MEDAG/CEBPB/WIF1/ZBTB7C/BMP2/SFRP2/RARRES2/CCDC71L	12
BP	GO:0002790	peptide secretion	16/541	225/18800	0.000840787	0.0124768	0.00976503	HADH/MPC2/IL6/TM7SF3/PCK2/MYRIP/FGG/ABAT/TFAP2B/CRHBP/PFKFB2/INHBB/RBP4/ILDR1/HNF4A/ANXA1	16
BP	GO:0097237	cellular response to toxic substance	11/541	123/18800	0.000854372	0.0126362	0.00988973	PTGS2/BMP7/PIM1/APOM/FABP1/GSTA1/ALB/RDH12/APOE/CD36/H19	11
BP	GO:0019216	regulation of lipid metabolic process	21/541	339/18800	0.000870647	0.0128341	0.0100446	FABP3/AGT/FMO5/PTGS2/ABCG1/ANGPTL3/FABP1/DAB2/LDLR/CYP27B1/FGF1/BMP2/UGT1A1/FGFR3/APOE/HNF4A/ANXA1/EPHX2/RARRES2/FABP5/DKK3	21
BP	GO:0006730	one-carbon metabolic process	6/541	40/18800	0.000922472	0.0132385	0.0103612	ALDH1L1/CA12/FTCD/ALDH1L2/CA10/CA4	6
BP	GO:0009069	serine family amino acid metabolic process	6/541	40/18800	0.000922472	0.0132385	0.0103612	SLC7A11/GGT1/PSAT1/DAO/GLYAT/AGXT2	6
BP	GO:0009309	amine biosynthetic process	6/541	40/18800	0.000922472	0.0132385	0.0103612	TGFB2/GPR37/MOXD1/NR4A2/DAO/AGMAT	6
BP	GO:0044275	cellular carbohydrate catabolic process	6/541	40/18800	0.000922472	0.0132385	0.0103612	ENOSF1/GK/MIOX/SORD/MGAM/GBA3	6
BP	GO:0072210	metanephric nephron development	6/541	40/18800	0.000922472	0.0132385	0.0103612	IRX2/SIX2/SALL1/WT1/TFAP2B/IRX1	6
BP	GO:0034612	response to tumor necrosis factor	17/541	249/18800	0.000923555	0.0132385	0.0103612	CLDN1/CARD16/PTGS2/TNFSF13B/TNFAIP3/PCK2/CXCL8/TNFRSF21/FABP4/GPD1/GBP2/CCL14/CRHBP/CCL15/TDGF1/CCL2/AKAP12	17
BP	GO:0009651	response to salt stress	5/541	27/18800	0.000925238	0.0132385	0.0103612	EFHD1/CLDN1/CAPN3/SLC12A6/AQP1	5
BP	GO:1902932	positive regulation of alcohol biosynthetic process	5/541	27/18800	0.000925238	0.0132385	0.0103612	ABCG1/DAB2/HRH1/PTH1R/FGF1	5
BP	GO:0006750	glutathione biosynthetic process	4/541	16/18800	0.00093687	0.0132385	0.0103612	GGT6/SLC7A11/GGT1/SLC1A1	4
BP	GO:0006857	oligopeptide transport	4/541	16/18800	0.00093687	0.0132385	0.0103612	SLC7A11/SLC13A3/SLC15A2/SLC9A3R1	4
BP	GO:0009074	aromatic amino acid family catabolic process	4/541	16/18800	0.00093687	0.0132385	0.0103612	HPD/HGD/KYNU/ACMSD	4
BP	GO:0034374	low-density lipoprotein particle remodeling	4/541	16/18800	0.00093687	0.0132385	0.0103612	AGT/ABCG1/MTTP/APOE	4
BP	GO:1902931	negative regulation of alcohol biosynthetic process	4/541	16/18800	0.00093687	0.0132385	0.0103612	CYP27B1/BMP2/APOE/DKK3	4
BP	GO:0061138	morphogenesis of a branching epithelium	14/541	185/18800	0.000959162	0.0135057	0.0105703	AGT/WNT2B/BMP7/SOCS3/VDR/EGF/SIX2/SALL1/WT1/AREG/NFATC4/FGF1/BMP2/SFRP2	14
BP	GO:0006140	regulation of nucleotide metabolic process	9/541	88/18800	0.000961868	0.0135057	0.0105703	PRKAA2/FBP1/AK4/SLC4A4/ENTPD5/IGF1/GPD1/ACMSD/H19	9
BP	GO:0050729	positive regulation of inflammatory response	12/541	145/18800	0.00100578	0.0140621	0.0110057	AGT/PTGER3/PTGS2/IL6/NFKBIZ/S100A12/LDLR/FABP4/IL33/CEBPB/SUCNR1/TSLP	12
BP	GO:0001558	regulation of cell growth	24/541	415/18800	0.00100783	0.0140621	0.0110057	AGT/IGFBP5/SLIT3/TGFB2/SYT1/FBP1/OLFM1/DAB2/IGF1/SGK2/WT1/TNC/SOX17/HRG/CYP27B1/PRKCQ/APOE/IGFBP1/BCL6/HNF4A/MAPT/SFRP2/NEDD4L/SLC44A4	24
BP	GO:0071356	cellular response to tumor necrosis factor	16/541	229/18800	0.00101361	0.0140983	0.0110341	CLDN1/CARD16/TNFSF13B/TNFAIP3/PCK2/CXCL8/TNFRSF21/FABP4/GPD1/GBP2/CCL14/CRHBP/CCL15/TDGF1/CCL2/AKAP12	16
BP	GO:1903532	positive regulation of secretion by cell	18/541	274/18800	0.00103014	0.0142835	0.011179	MPC2/AGT/TGFB2/TM7SF3/SYT1/ABCG1/PCK2/MYRIP/FGG/DAB2/IGF1/ABAT/PFKFB2/BMP2/INHBB/RBP4/ILDR1/SDC1	18
BP	GO:0070098	chemokine-mediated signaling pathway	9/541	89/18800	0.00104338	0.014422	0.0112875	SLIT3/CXCL1/CXCL2/CXCL8/CXCL3/ACKR4/CCL14/CCL15/CCL2	9
BP	GO:0050708	regulation of protein secretion	17/541	252/18800	0.00105348	0.0144436	0.0113044	HADH/MPC2/TGFB2/IL6/TM7SF3/ABCG1/PCK2/MYRIP/FGG/IGF1/ABAT/TFAP2B/PFKFB2/INHBB/RBP4/APOE/HNF4A	17
BP	GO:0045429	positive regulation of nitric oxide biosynthetic process	6/541	41/18800	0.00105471	0.0144436	0.0113044	AGT/PTGS2/KLF4/CLU/AGXT2/CD36	6
BP	GO:0050892	intestinal absorption	6/541	41/18800	0.00105471	0.0144436	0.0113044	VIL1/VDR/FABP1/SLC2A5/LDLR/CD36	6
BP	GO:0043410	positive regulation of MAPK cascade	27/541	491/18800	0.0010647	0.0145356	0.0113764	TMEM106A/TGFB2/GPR37/ICAM1/IL6/RASSF2/HAVCR2/EGF/FGG/NRG1/S100A12/IGF1/CCL14/GLIPR2/TPBG/GADD45B/CCL15/FGF1/BMP2/TDGF1/FGFR3/APOE/UNC5CL/IGFBP6/CD36/CCL2/AKAP12	27
BP	GO:0055078	sodium ion homeostasis	7/541	56/18800	0.00107508	0.0146323	0.011452	AGT/CYP4A11/SCN7A/SLC12A3/TFAP2B/CYP4F2/NEDD4L	7
BP	GO:0015740	C4-dicarboxylate transport	5/541	28/18800	0.00110001	0.0147542	0.0115474	SLC7A13/SLC13A2/SLC13A3/ABAT/SLC1A1	5
BP	GO:0042133	neurotransmitter metabolic process	5/541	28/18800	0.00110001	0.0147542	0.0115474	PRIMA1/MOXD1/ABAT/GAD1/SLC44A4	5
BP	GO:0042402	cellular biogenic amine catabolic process	5/541	28/18800	0.00110001	0.0147542	0.0115474	MOXD1/CHDH/KYNU/DMGDH/ACMSD	5
BP	GO:0090330	regulation of platelet aggregation	5/541	28/18800	0.00110001	0.0147542	0.0115474	ADAMTS18/IL6/FGG/ABAT/PRKCQ	5
BP	GO:0016051	carbohydrate biosynthetic process	15/541	209/18800	0.00110067	0.0147542	0.0115474	GOT1/PCK2/IMPA2/FBP1/EGF/PC/IGF1/HAS1/GPD1/SORD/HRH1/PTH1R/ST3GAL6/RBP4/FUT6	15
BP	GO:0050796	regulation of insulin secretion	12/541	147/18800	0.00113328	0.0151457	0.0118538	HADH/MPC2/IL6/TM7SF3/PCK2/MYRIP/ABAT/TFAP2B/PFKFB2/INHBB/RBP4/HNF4A	12
BP	GO:0051346	negative regulation of hydrolase activity	22/541	371/18800	0.00117066	0.0155983	0.0122081	AGT/CARD16/TGFB2/PTGS2/VIL1/ANGPTL3/LPA/PPP1R15A/KNG1/PLAUR/KLF4/FABP1/SERPINA6/TFPI2/HRG/SERPINA5/IFI16/SLPI/DPEP1/ANXA1/SFRP2/AQP1	22
BP	GO:0050714	positive regulation of protein secretion	11/541	128/18800	0.00118672	0.0156729	0.0122665	MPC2/TGFB2/TM7SF3/ABCG1/PCK2/MYRIP/FGG/IGF1/ABAT/PFKFB2/RBP4	11
BP	GO:1990266	neutrophil migration	11/541	128/18800	0.00118672	0.0156729	0.0122665	CXCL1/TGFB2/CXCL2/PECAM1/CXCL8/UMOD/CXCL3/S100A12/CCL14/CCL15/CCL2	11
BP	GO:0006766	vitamin metabolic process	10/541	109/18800	0.00119417	0.0156729	0.0122665	CLYBL/SLC23A1/SLC2A3/CUBN/PSAT1/CYP27B1/CYP4F3/CYP4F2/ALDH1L2/ALDH1A2	10
BP	GO:0001658	branching involved in ureteric bud morphogenesis	7/541	57/18800	0.00119573	0.0156729	0.0122665	AGT/WNT2B/SIX2/SALL1/WT1/FGF1/BMP2	7
BP	GO:0044539	long-chain fatty acid import into cell	4/541	17/18800	0.00119746	0.0156729	0.0122665	FABP3/ACSL1/CD36/SLC27A2	4
BP	GO:0051770	positive regulation of nitric-oxide synthase biosynthetic process	4/541	17/18800	0.00119746	0.0156729	0.0122665	NAMPT/IL33/CCL2/AKAP12	4
BP	GO:0090277	positive regulation of peptide hormone secretion	9/541	91/18800	0.00122319	0.0159626	0.0124932	MPC2/TM7SF3/PCK2/MYRIP/FGG/ABAT/PFKFB2/RBP4/ILDR1	9
BP	GO:0045669	positive regulation of osteoblast differentiation	8/541	74/18800	0.00127068	0.0165337	0.0129401	DDR2/IL6/BMP7/IGF1/CEBPB/NELL1/BMP2/SFRP2	8
BP	GO:0003156	regulation of animal organ formation	5/541	29/18800	0.0012981	0.0167979	0.0131469	WNT2B/BMP7/WT1/FGF1/BMP2	5
BP	GO:0009306	protein secretion	21/541	350/18800	0.00129855	0.0167979	0.0131469	HADH/MPC2/TGFB2/IL6/TM7SF3/ABCG1/PCK2/MYRIP/MTTP/FGG/IGF1/ABAT/TFAP2B/PFKFB2/INHBB/RBP4/APOE/LTBP2/SUCNR1/HNF4A/ANXA1	21
BP	GO:0006584	catecholamine metabolic process	7/541	58/18800	0.00132673	0.0170628	0.0133543	TGFB2/GPR37/MOXD1/NR4A2/ABAT/DAO/SLC1A1	7
BP	GO:0009712	catechol-containing compound metabolic process	7/541	58/18800	0.00132673	0.0170628	0.0133543	TGFB2/GPR37/MOXD1/NR4A2/ABAT/DAO/SLC1A1	7
BP	GO:0071347	cellular response to interleukin-1	10/541	111/18800	0.001372	0.0175942	0.0137701	IL6/CXCL8/FGG/CEBPB/GBP2/CCL14/CCL15/INHBB/CCL2/AKAP12	10
BP	GO:0032868	response to insulin	17/541	259/18800	0.00141825	0.0181348	0.0141932	HADH/ECHDC3/AGT/GOT1/SOCS3/PCK2/FBP1/SRD5A1/KHK/PIK3R1/SLC22A12/PNPLA3/INHBB/PRKCQ/IGFBP1/EGR2/RARRES2	17
BP	GO:0002793	positive regulation of peptide secretion	9/541	93/18800	0.0014272	0.0181968	0.0142418	MPC2/TM7SF3/PCK2/MYRIP/FGG/ABAT/PFKFB2/RBP4/ILDR1	9
BP	GO:0009185	ribonucleoside diphosphate metabolic process	10/541	112/18800	0.00146867	0.0186719	0.0146136	PRKAA2/DHTKD1/FBP1/AK4/SLC4A4/ENTPD5/ALDOB/IGF1/GPD1/PFKFB2	10
BP	GO:0009125	nucleoside monophosphate catabolic process	4/541	18/18800	0.00150484	0.018673	0.0146144	UPP2/UPB1/DPYS/GDA	4
BP	GO:0015936	coenzyme A metabolic process	4/541	18/18800	0.00150484	0.018673	0.0146144	ACOT7/PANK1/ACAT1/MCCC2	4
BP	GO:0019184	nonribosomal peptide biosynthetic process	4/541	18/18800	0.00150484	0.018673	0.0146144	GGT6/SLC7A11/GGT1/SLC1A1	4
BP	GO:0034433	steroid esterification	4/541	18/18800	0.00150484	0.018673	0.0146144	AGT/ACAT1/ABCG1/APOE	4
BP	GO:0034434	sterol esterification	4/541	18/18800	0.00150484	0.018673	0.0146144	AGT/ACAT1/ABCG1/APOE	4
BP	GO:0034435	cholesterol esterification	4/541	18/18800	0.00150484	0.018673	0.0146144	AGT/ACAT1/ABCG1/APOE	4
BP	GO:0140354	lipid import into cell	4/541	18/18800	0.00150484	0.018673	0.0146144	FABP3/ACSL1/CD36/SLC27A2	4
BP	GO:0061045	negative regulation of wound healing	8/541	76/18800	0.00151229	0.018673	0.0146144	ADAMTS18/PLG/KNG1/FGG/ABAT/HRG/APOH/APOE	8
BP	GO:0009310	amine catabolic process	5/541	30/18800	0.00152131	0.018673	0.0146144	MOXD1/CHDH/KYNU/DMGDH/ACMSD	5
BP	GO:0034368	protein-lipid complex remodeling	5/541	30/18800	0.00152131	0.018673	0.0146144	AGT/ABCG1/MTTP/APOM/APOE	5
BP	GO:0034369	plasma lipoprotein particle remodeling	5/541	30/18800	0.00152131	0.018673	0.0146144	AGT/ABCG1/MTTP/APOM/APOE	5
BP	GO:0045939	negative regulation of steroid metabolic process	5/541	30/18800	0.00152131	0.018673	0.0146144	CYP27B1/BMP2/UGT1A1/APOE/DKK3	5
BP	GO:0010565	regulation of cellular ketone metabolic process	11/541	132/18800	0.00152346	0.018673	0.0146144	FABP3/PTGS2/SLC7A11/FABP1/DAB2/SLC7A7/BMP2/ACMSD/ANXA1/FABP5/DKK3	11
BP	GO:1904659	glucose transmembrane transport	10/541	113/18800	0.0015708	0.0192002	0.0150271	SLC2A14/SLC2A3/SLC2A5/IGF1/PIK3R1/SLC5A10/SLC2A2/SLC5A9/SLC2A9/FABP5	10
BP	GO:0045834	positive regulation of lipid metabolic process	12/541	153/18800	0.00159867	0.0194871	0.0152516	FABP3/AGT/PTGS2/ABCG1/ANGPTL3/FABP1/DAB2/LDLR/FGF1/FGFR3/APOE/ANXA1	12
BP	GO:0071496	cellular response to external stimulus	19/541	309/18800	0.00163985	0.0198843	0.0155625	PRKAA2/AGT/WNT2B/SLC39A4/PTGS2/SLC39A5/PIM1/VDR/KCNJ2/SRD5A1/NR4A2/CYP27B1/IFI16/ALB/DAPL1/INHBB/AOC1/SFRP2/AQP1	19
BP	GO:0007159	leukocyte cell-cell adhesion	22/541	381/18800	0.00164022	0.0198843	0.0155625	ADD2/TNFSF13B/ICAM1/IL6/BMP7/PECAM1/TNFRSF21/JAM2/HAVCR2/KLF4/NFKBIZ/UMOD/MAP3K8/IGF1/HLA-DQB1/CEBPB/EGR3/PRKCQ/BCL6/ANXA1/CCL2/PAG1	22
BP	GO:0045913	positive regulation of carbohydrate metabolic process	8/541	77/18800	0.00164603	0.0199003	0.015575	PRKAA2/SLC4A4/EGF/ENTPD5/IGF1/GPD1/HRH1/PTH1R	8
BP	GO:0032496	response to lipopolysaccharide	20/541	333/18800	0.00165661	0.0199739	0.0156326	CLDN1/CARD16/CXCL1/PTGS2/CXCL2/TRIM6/IL6/TNFAIP3/PCK2/CXCL8/HAVCR2/CXCL3/CEBPB/CYP27B1/SLPI/UGT1A1/CD36/CCL2/DEFA1/AKAP12	20
BP	GO:0052547	regulation of peptidase activity	25/541	456/18800	0.0016752	0.0201433	0.0157652	CYFIP2/AGT/CARD16/PTGS2/VIL1/LPA/KNG1/PLAUR/KLF4/FABP1/SERPINA6/TFPI2/HRG/GSN/SERPINA5/IFI16/SLC1A1/SLPI/ANTXR1/DPEP1/PCOLCE2/MAPT/PCOLCE/SFRP2/AQP1	25
BP	GO:0016125	sterol metabolic process	12/541	154/18800	0.00168971	0.0202628	0.0158587	PRKAA2/FMO5/ABCG1/ANGPTL3/ACAA2/CH25H/CUBN/LDLR/FGF1/APOE/PON1/EPHX2	12
BP	GO:0010631	epithelial cell migration	21/541	358/18800	0.00171302	0.020487	0.0160342	AGT/TGFB2/PTGS2/VIL1/PTN/S100P/KLF4/EGF/MARVELD3/DCN/HRG/ANGPT2/GLIPR2/NRP2/EGR3/FGF1/APOH/RAB25/TDGF1/APOE/ANXA1	21
BP	GO:0006110	regulation of glycolytic process	6/541	45/18800	0.00173412	0.0206835	0.016188	PRKAA2/FBP1/SLC4A4/ENTPD5/IGF1/GPD1	6
BP	GO:0007611	learning or memory	17/541	264/18800	0.00173976	0.0206953	0.0161972	AGT/PTGS2/SLC7A11/PTN/CPEB3/CLDN5/LDLR/HRH1/CEBPB/TPBG/NFATC4/CRHBP/SLC1A1/APOE/EGR2/NPTX2/MAPT	17
BP	GO:0009072	aromatic amino acid family metabolic process	5/541	31/18800	0.00177151	0.0209605	0.0164048	IYD/HPD/HGD/KYNU/ACMSD	5
BP	GO:0032148	activation of protein kinase B activity	5/541	31/18800	0.00177151	0.0209605	0.0164048	NRG1/CCDC88A/IGF1/SLC1A1/FGF1	5
BP	GO:0006979	response to oxidative stress	24/541	433/18800	0.00178155	0.0210232	0.0164539	PRKAA2/ANGPTL7/PTGS2/SLC7A11/GPR37/DHRS2/IL6/BMP7/TNFAIP3/SLC4A11/MSRA/FABP1/NR4A2/SGK2/AREG/SLC1A1/APOE/SDC1/CD36/ANXA1/MAPT/SCARA3/AQP1/H19	24
BP	GO:0016049	cell growth	26/541	484/18800	0.00181408	0.0213503	0.0167099	CYFIP2/AGT/IGFBP5/SLIT3/TGFB2/SYT1/FBP1/OLFM1/DAB2/IGF1/SGK2/WT1/TNC/SOX17/HRG/CYP27B1/NRP2/PRKCQ/APOE/IGFBP1/BCL6/HNF4A/MAPT/SFRP2/NEDD4L/SLC44A4	26
BP	GO:0006071	glycerol metabolic process	4/541	19/18800	0.00186315	0.0217547	0.0170264	GOT1/GK/PCK2/ANGPTL3	4
BP	GO:0010544	negative regulation of platelet activation	4/541	19/18800	0.00186315	0.0217547	0.0170264	ADAMTS18/FGG/ABAT/APOE	4
BP	GO:0072074	kidney mesenchyme development	4/541	19/18800	0.00186315	0.0217547	0.0170264	BMP7/SIX2/WT1/BASP1	4
BP	GO:0035725	sodium ion transmembrane transport	13/541	177/18800	0.00188082	0.0219034	0.0171427	SLC4A11/SLC6A8/SLC23A1/SLC4A4/SCN2B/SLC34A1/SCN7A/SLC12A3/SLC6A19/SLC5A10/WNK4/NEDD4L/SLC9A3R1	13
BP	GO:0090132	epithelium migration	21/541	361/18800	0.00189513	0.0220122	0.0172279	AGT/TGFB2/PTGS2/VIL1/PTN/S100P/KLF4/EGF/MARVELD3/DCN/HRG/ANGPT2/GLIPR2/NRP2/EGR3/FGF1/APOH/RAB25/TDGF1/APOE/ANXA1	21
BP	GO:1990868	response to chemokine	9/541	97/18800	0.00191719	0.0221213	0.0173133	SLIT3/CXCL1/CXCL2/CXCL8/CXCL3/ACKR4/CCL14/CCL15/CCL2	9
BP	GO:1990869	cellular response to chemokine	9/541	97/18800	0.00191719	0.0221213	0.0173133	SLIT3/CXCL1/CXCL2/CXCL8/CXCL3/ACKR4/CCL14/CCL15/CCL2	9
BP	GO:0071674	mononuclear cell migration	14/541	199/18800	0.00191947	0.0221213	0.0173133	ICAM1/IL6/PECAM1/PLG/JAM2/CH25H/S100A12/CCL14/CCL15/PTPRO/ANXA1/CCL2/DEFA1/RARRES2	14
BP	GO:0045667	regulation of osteoblast differentiation	11/541	136/18800	0.00193468	0.0222388	0.0174053	IGFBP5/DDR2/IL6/BMP7/RASSF2/IGF1/AREG/CEBPB/NELL1/BMP2/SFRP2	11
BP	GO:0009261	ribonucleotide catabolic process	6/541	46/18800	0.00194657	0.0223177	0.017467	ACOT7/ACAT1/UPB1/DPYS/PDE10A/GDA	6
BP	GO:0030199	collagen fibril organization	7/541	62/18800	0.00196646	0.0224876	0.0176	DDR2/TGFB2/ADAMTS3/DPT/COL11A1/SFRP2/LUM	7
BP	GO:0008645	hexose transmembrane transport	10/541	117/18800	0.0020385	0.0230924	0.0180733	SLC2A14/SLC2A3/SLC2A5/IGF1/PIK3R1/SLC5A10/SLC2A2/SLC5A9/SLC2A9/FABP5	10
BP	GO:0015718	monocarboxylic acid transport	10/541	117/18800	0.0020385	0.0230924	0.0180733	MPC2/SLC16A4/SLC6A8/ABCC2/SLC5A12/PLA2G12B/SLC16A9/CD36/ANXA1/SLC9A3R1	10
BP	GO:0034754	cellular hormone metabolic process	11/541	137/18800	0.00205046	0.0230924	0.0180733	DHRS2/ADH6/CYP17A1/SRD5A1/DAB2/RDH12/BMP2/UGT1A1/ALDH1A2/RBP4/DKK3	11
BP	GO:0034367	protein-containing complex remodeling	5/541	32/18800	0.00205058	0.0230924	0.0180733	AGT/ABCG1/MTTP/APOM/APOE	5
BP	GO:0055075	potassium ion homeostasis	5/541	32/18800	0.00205058	0.0230924	0.0180733	SLC12A6/KCNJ2/SLC12A3/KCNJ10/TFAP2B	5
BP	GO:0090183	regulation of kidney development	5/541	32/18800	0.00205058	0.0230924	0.0180733	AGT/WNT2B/SIX2/WT1/BASP1	5
BP	GO:0120162	positive regulation of cold-induced thermogenesis	9/541	98/18800	0.00205855	0.0231235	0.0180977	HADH/ACSL1/PRDM16/PRLR/FABP4/ESRRG/CEBPB/CD36/FABP5	9
BP	GO:0030073	insulin secretion	13/541	179/18800	0.00207767	0.0232794	0.0182197	HADH/MPC2/IL6/TM7SF3/PCK2/MYRIP/ABAT/TFAP2B/PFKFB2/INHBB/RBP4/HNF4A/ANXA1	13
BP	GO:0060675	ureteric bud morphogenesis	7/541	63/18800	0.00215851	0.0240636	0.0188334	AGT/WNT2B/SIX2/SALL1/WT1/FGF1/BMP2	7
BP	GO:0070542	response to fatty acid	7/541	63/18800	0.00215851	0.0240636	0.0188334	ACSL1/CLDN1/PTGS2/LDLR/ILDR1/CD36/PON1	7
BP	GO:0098659	inorganic cation import across plasma membrane	10/541	118/18800	0.00217141	0.0240863	0.0188512	SLC39A4/KCNJ3/SLC39A5/SLC12A6/KCNJ2/SLC34A1/SLC12A3/KCNJ10/WNK4/KCNJ15	10
BP	GO:0099587	inorganic ion import across plasma membrane	10/541	118/18800	0.00217141	0.0240863	0.0188512	SLC39A4/KCNJ3/SLC39A5/SLC12A6/KCNJ2/SLC34A1/SLC12A3/KCNJ10/WNK4/KCNJ15	10
BP	GO:0042908	xenobiotic transport	6/541	47/18800	0.00217814	0.0241007	0.0188625	CLDN1/SLC22A18/ABCC2/SLC47A1/SLC15A2/SLC22A4	6
BP	GO:0006959	humoral immune response	19/541	317/18800	0.00219059	0.0241783	0.0189232	KLK7/CXCL1/CXCL2/IL6/CXCL8/TNFRSF21/CXCL3/KLK5/S100A12/MFAP4/HLA-DQB1/HRG/CLU/CFH/SLPI/CCL2/DEFA1/C1S/RARRES2	19
BP	GO:0090130	tissue migration	21/541	366/18800	0.00223516	0.0246089	0.0192602	AGT/TGFB2/PTGS2/VIL1/PTN/S100P/KLF4/EGF/MARVELD3/DCN/HRG/ANGPT2/GLIPR2/NRP2/EGR3/FGF1/APOH/RAB25/TDGF1/APOE/ANXA1	21
BP	GO:0010288	response to lead ion	4/541	20/18800	0.00227648	0.0247567	0.0193759	CLDN1/PTGS2/SLC34A1/MAPT	4
BP	GO:0043691	reverse cholesterol transport	4/541	20/18800	0.00227648	0.0247567	0.0193759	ABCG1/APOM/CLU/APOE	4
BP	GO:0046653	tetrahydrofolate metabolic process	4/541	20/18800	0.00227648	0.0247567	0.0193759	ALDH1L1/FTCD/ALDH1L2/PIPOX	4
BP	GO:0060231	mesenchymal to epithelial transition	4/541	20/18800	0.00227648	0.0247567	0.0193759	SIX2/SALL1/WT1/BASP1	4
BP	GO:0070293	renal absorption	4/541	20/18800	0.00227648	0.0247567	0.0193759	GSN/WNK4/SLC15A2/SLC9A3R1	4
BP	GO:0000096	sulfur amino acid metabolic process	5/541	33/18800	0.0023604	0.0253591	0.0198474	SLC7A11/MSRA/GGT1/BHMT2/DPEP1	5
BP	GO:0001893	maternal placenta development	5/541	33/18800	0.0023604	0.0253591	0.0198474	PTGS2/PTN/VDR/CYP27B1/JUNB	5
BP	GO:0045940	positive regulation of steroid metabolic process	5/541	33/18800	0.0023604	0.0253591	0.0198474	AGT/ABCG1/DAB2/FGF1/APOE	5
BP	GO:0072171	mesonephric tubule morphogenesis	7/541	64/18800	0.00236473	0.0253591	0.0198474	AGT/WNT2B/SIX2/SALL1/WT1/FGF1/BMP2	7
BP	GO:0080164	regulation of nitric oxide metabolic process	7/541	64/18800	0.00236473	0.0253591	0.0198474	AGT/TMEM106A/PTGS2/KLF4/CLU/AGXT2/CD36	7
BP	GO:0098869	cellular oxidant detoxification	9/541	100/18800	0.00236616	0.0253591	0.0198474	PTGS2/BMP7/APOM/FABP1/GSTA1/ALB/APOE/CD36/H19	9
BP	GO:0007178	transmembrane receptor protein serine/threonine kinase signaling pathway	21/541	368/18800	0.00238493	0.0254987	0.0199566	TGFB2/BMP7/SLC39A5/CHRDL1/CLDN5/PRDM16/PBLD/DAB2/SFRP4/TFAP2B/BTBD11/SOSTDC1/BMP2/INHBB/TDGF1/LTBP2/SOST/ZNF423/HNF4A/SFRP2/DKK3	21
BP	GO:0050673	epithelial cell proliferation	24/541	443/18800	0.002399	0.0255874	0.020026	CLDN1/IGFBP5/TGFB2/IL6/TNFAIP3/PTN/VDR/EGF/DAB2/MARVELD3/IGF1/AREG/CEBPB/NRP2/AQP11/EGR3/FGF1/BMP2/APOH/ALDH1A2/APOE/SFRP2/COL8A1/CCL2	24
BP	GO:0006560	proline metabolic process	3/541	10/18800	0.00244497	0.0256462	0.0200721	DAO/PRODH2/ALDH4A1	3
BP	GO:0034776	response to histamine	3/541	10/18800	0.00244497	0.0256462	0.0200721	HRH1/GABRB3/AOC1	3
BP	GO:0051918	negative regulation of fibrinolysis	3/541	10/18800	0.00244497	0.0256462	0.0200721	PLG/HRG/APOH	3
BP	GO:1901748	leukotriene D4 metabolic process	3/541	10/18800	0.00244497	0.0256462	0.0200721	GGT6/GGT1/GGTLC1	3
BP	GO:1901750	leukotriene D4 biosynthetic process	3/541	10/18800	0.00244497	0.0256462	0.0200721	GGT6/GGT1/GGTLC1	3
BP	GO:2000121	regulation of removal of superoxide radicals	3/541	10/18800	0.00244497	0.0256462	0.0200721	BMP7/CD36/H19	3
BP	GO:2000347	positive regulation of hepatocyte proliferation	3/541	10/18800	0.00244497	0.0256462	0.0200721	TNFAIP3/PTN/FGF1	3
BP	GO:0032869	cellular response to insulin stimulus	14/541	205/18800	0.00252508	0.026424	0.0206808	ECHDC3/AGT/GOT1/SOCS3/PCK2/FBP1/SRD5A1/PIK3R1/SLC22A12/PNPLA3/INHBB/PRKCQ/IGFBP1/RARRES2	14
BP	GO:0070167	regulation of biomineral tissue development	9/541	101/18800	0.00253309	0.0264454	0.0206976	DDR2/BMP7/PTN/OMD/CEBPB/CYP27B1/ENAM/NELL1/BMP2	9
BP	GO:0070555	response to interleukin-1	11/541	141/18800	0.00257127	0.026744	0.0209312	IL6/CXCL8/FGG/CEBPB/GBP2/CCL14/CCL15/INHBB/ANXA1/CCL2/AKAP12	11
BP	GO:0014823	response to activity	7/541	65/18800	0.00258579	0.026744	0.0209312	PRKAA2/HADH/AGT/IL6/CAPN3/SRD5A1/ANGPT2	7
BP	GO:0042446	hormone biosynthetic process	7/541	65/18800	0.00258579	0.026744	0.0209312	CYP17A1/SRD5A1/DAB2/DIO1/CYP27B1/BMP2/DKK3	7
BP	GO:0048645	animal organ formation	7/541	65/18800	0.00258579	0.026744	0.0209312	WNT2B/BMP7/PIM1/WT1/SOX17/FGF1/BMP2	7
BP	GO:0045785	positive regulation of cell adhesion	24/541	446/18800	0.00261644	0.026998	0.0211301	COL26A1/TGFB2/TNFSF13B/IL6/BMP7/PLAUR/HAVCR2/FGG/NFKBIZ/CCDC80/MAP3K8/DAB2/IGF1/S100A10/HLA-DQB1/HRG/EGR3/PRKCQ/CD36/BCL6/ANXA1/SFRP2/COL8A1/CCL2	24
BP	GO:0033273	response to vitamin	8/541	83/18800	0.00265691	0.0272887	0.0213576	PTGS2/BMP7/PIM1/VDR/SLC34A1/CYP27B1/KYNU/ALDH1A2	8
BP	GO:0060395	SMAD protein signal transduction	8/541	83/18800	0.00265691	0.0272887	0.0213576	TGFB2/BMP7/PBLD/DAB2/BTBD11/BMP2/INHBB/HNF4A	8
BP	GO:0044273	sulfur compound catabolic process	5/541	34/18800	0.00270288	0.0276329	0.021627	ACOT7/ACAT1/GGT1/GGTLC1/DPEP1	5
BP	GO:0090322	regulation of superoxide metabolic process	5/541	34/18800	0.00270288	0.0276329	0.021627	AGT/BMP7/CD36/MAPT/H19	5
BP	GO:0003091	renal water homeostasis	4/541	21/18800	0.00274885	0.0278462	0.0217939	CYP4A11/TFAP2B/CYP4F2/AQP1	4
BP	GO:0014850	response to muscle activity	4/541	21/18800	0.00274885	0.0278462	0.0217939	PRKAA2/AGT/CAPN3/SRD5A1	4
BP	GO:0051767	nitric-oxide synthase biosynthetic process	4/541	21/18800	0.00274885	0.0278462	0.0217939	NAMPT/IL33/CCL2/AKAP12	4
BP	GO:0051769	regulation of nitric-oxide synthase biosynthetic process	4/541	21/18800	0.00274885	0.0278462	0.0217939	NAMPT/IL33/CCL2/AKAP12	4
BP	GO:0007613	memory	10/541	122/18800	0.00277444	0.0280414	0.0219467	PTGS2/PTN/CPEB3/LDLR/HRH1/CEBPB/NFATC4/SLC1A1/APOE/MAPT	10
BP	GO:0030104	water homeostasis	7/541	66/18800	0.0028224	0.0284613	0.0222753	CLDN1/CYP4A11/TFAP2B/AQP11/CYP4F2/NEDD4L/AQP1	7
BP	GO:0071277	cellular response to calcium ion	8/541	84/18800	0.0028644	0.0288194	0.0225556	PRKAA2/SYT1/CAPN3/CRHBP/JUNB/INHBB/FOSB/DPEP1	8
BP	GO:0006641	triglyceride metabolic process	9/541	103/18800	0.00289489	0.0288643	0.0225908	ACSL1/GK/PCK2/MTTP/LDLR/PNPLA3/APOH/APOE/SLC22A4	9
BP	GO:0032760	positive regulation of tumor necrosis factor production	9/541	103/18800	0.00289489	0.0288643	0.0225908	TMEM106A/IL6/HAVCR2/IL33/PIK3R1/CLU/NFATC4/CD36/AKAP12	9
BP	GO:0070252	actin-mediated cell contraction	9/541	103/18800	0.00289489	0.0288643	0.0225908	MYH8/KCNJ3/VIL1/TNNT2/KCNJ2/SCN2B/GSN/KCNE1/NEDD4L	9
BP	GO:0110149	regulation of biomineralization	9/541	103/18800	0.00289489	0.0288643	0.0225908	DDR2/BMP7/PTN/OMD/CEBPB/CYP27B1/ENAM/NELL1/BMP2	9
BP	GO:0003007	heart morphogenesis	16/541	254/18800	0.0029203	0.0290524	0.022738	SLIT3/TGFB2/BMP7/PIM1/CLDN5/FLRT2/TNNT2/NRG1/OLFM1/SOX17/NRP2/BMP2/ALDH1A2/RBP4/COL11A1/SFRP2	16
BP	GO:0032355	response to estradiol	10/541	123/18800	0.00294436	0.0291983	0.0228521	AGT/PTGS2/BMP7/SRD5A1/SLC34A1/AREG/CRHBP/UGT1A1/ALDH1A2/ANXA1	10
BP	GO:0045861	negative regulation of proteolysis	20/541	350/18800	0.00294812	0.0291983	0.0228521	AGT/CARD16/PTGS2/VIL1/LPA/KNG1/PLAUR/KLF4/FABP1/SERPINA6/TFPI2/HRG/AQP11/SERPINA5/IFI16/SLPI/DPEP1/GAS1/SFRP2/AQP1	20
BP	GO:0006692	prostanoid metabolic process	6/541	50/18800	0.00299821	0.0294968	0.0230858	PTGS2/PTGDS/GSTA1/CES2/ANXA1/FABP5	6
BP	GO:0006693	prostaglandin metabolic process	6/541	50/18800	0.00299821	0.0294968	0.0230858	PTGS2/PTGDS/GSTA1/CES2/ANXA1/FABP5	6
BP	GO:1903053	regulation of extracellular matrix organization	6/541	50/18800	0.00299821	0.0294968	0.0230858	ANGPTL7/AGT/DDR2/IL6/BMP2/ANTXR1	6
BP	GO:0032024	positive regulation of insulin secretion	7/541	67/18800	0.00307524	0.0301434	0.0235918	MPC2/TM7SF3/PCK2/MYRIP/ABAT/PFKFB2/RBP4	7
BP	GO:0033280	response to vitamin D	5/541	35/18800	0.00307995	0.0301434	0.0235918	PTGS2/BMP7/PIM1/VDR/CYP27B1	5
BP	GO:0046889	positive regulation of lipid biosynthetic process	8/541	85/18800	0.00308431	0.0301434	0.0235918	FABP3/PTGS2/ABCG1/DAB2/LDLR/FGF1/APOE/ANXA1	8
BP	GO:0031099	regeneration	13/541	188/18800	0.00318508	0.0310598	0.024309	CLDN1/IL6/PTN/CAPN3/KLK6/PLG/KLF4/IGF1/CEBPB/ANGPT2/UGT1A1/IGFBP1/ANXA1	13
BP	GO:0060562	epithelial tube morphogenesis	19/541	328/18800	0.00319572	0.0310952	0.0243367	AGT/WNT2B/TGFB2/IRX2/BMP7/VDR/EGF/SIX2/SALL1/WT1/SOX17/IRX1/AREG/WNK4/NFATC4/SOSTDC1/FGF1/BMP2/SFRP2	19
BP	GO:0046885	regulation of hormone biosynthetic process	4/541	22/18800	0.00328418	0.0313186	0.0245116	DAB2/CYP27B1/BMP2/DKK3	4
BP	GO:0006751	glutathione catabolic process	3/541	11/18800	0.0032904	0.0313186	0.0245116	GGT1/GGTLC1/DPEP1	3
BP	GO:0015937	coenzyme A biosynthetic process	3/541	11/18800	0.0032904	0.0313186	0.0245116	ACOT7/PANK1/ACAT1	3
BP	GO:0032342	aldosterone biosynthetic process	3/541	11/18800	0.0032904	0.0313186	0.0245116	DAB2/BMP2/DKK3	3
BP	GO:0032351	negative regulation of hormone metabolic process	3/541	11/18800	0.0032904	0.0313186	0.0245116	CYP27B1/BMP2/DKK3	3
BP	GO:0046689	response to mercury ion	3/541	11/18800	0.0032904	0.0313186	0.0245116	SLC34A1/SLC1A1/AQP1	3
BP	GO:0070561	vitamin D receptor signaling pathway	3/541	11/18800	0.0032904	0.0313186	0.0245116	PIM1/VDR/CYP27B1	3
BP	GO:0072488	ammonium transmembrane transport	3/541	11/18800	0.0032904	0.0313186	0.0245116	SLC12A6/RHCG/AQP1	3
BP	GO:1903961	positive regulation of anion transmembrane transport	3/541	11/18800	0.0032904	0.0313186	0.0245116	AGT/SLC34A1/ACE2	3
BP	GO:0034308	primary alcohol metabolic process	9/541	105/18800	0.00329633	0.0313186	0.0245116	ADH6/DAB2/IGF1/GPD1/RDH12/BMP2/ALDH1A2/RBP4/DKK3	9
BP	GO:1901890	positive regulation of cell junction assembly	9/541	105/18800	0.00329633	0.0313186	0.0245116	LRRTM1/CLDN1/AGT/CLDN5/FLRT2/S100A10/HRG/ACE2/TPBG	9
BP	GO:0015804	neutral amino acid transport	6/541	51/18800	0.00331701	0.0313819	0.0245612	SLC7A13/SLC7A8/SLC6A19/ACE2/SFXN2/SLC1A1	6
BP	GO:1900542	regulation of purine nucleotide metabolic process	8/541	86/18800	0.00331713	0.0313819	0.0245612	PRKAA2/FBP1/AK4/SLC4A4/ENTPD5/IGF1/GPD1/H19	8
BP	GO:0002237	response to molecule of bacterial origin	20/541	354/18800	0.00335168	0.0316413	0.0247642	CLDN1/CARD16/CXCL1/PTGS2/CXCL2/TRIM6/IL6/TNFAIP3/PCK2/CXCL8/HAVCR2/CXCL3/CEBPB/CYP27B1/SLPI/UGT1A1/CD36/CCL2/DEFA1/AKAP12	20
BP	GO:0106106	cold-induced thermogenesis	11/541	146/18800	0.00336736	0.0316546	0.0247746	HADH/ACSL1/PRDM16/PLCL1/PRLR/FABP4/ESRRG/CEBPB/ZNF423/CD36/FABP5	11
BP	GO:0120161	regulation of cold-induced thermogenesis	11/541	146/18800	0.00336736	0.0316546	0.0247746	HADH/ACSL1/PRDM16/PLCL1/PRLR/FABP4/ESRRG/CEBPB/ZNF423/CD36/FABP5	11
BP	GO:0048545	response to steroid hormone	19/541	330/18800	0.00341452	0.03203	0.0250684	SST/CLDN1/SLIT3/TGFB2/PTGS2/GOT1/IL6/BMP7/PCK2/SRD5A1/DAB2/ESRRG/AREG/UGT1A1/FOSB/SDC1/ANXA1/DEFA1/AQP1	19
BP	GO:0050890	cognition	18/541	306/18800	0.00344936	0.0322886	0.0252708	GPR155/AGT/PTGS2/SLC7A11/PTN/CPEB3/CLDN5/LDLR/HRH1/CEBPB/TPBG/NFATC4/CRHBP/SLC1A1/APOE/EGR2/NPTX2/MAPT	18
BP	GO:0022407	regulation of cell-cell adhesion	24/541	456/18800	0.00346593	0.0323754	0.0253387	ADAMTS18/TNFSF13B/IL6/BMP7/TNFRSF21/PLG/PLAUR/HAVCR2/KLF4/FGG/NFKBIZ/MAP3K8/IGF1/ABAT/HLA-DQB1/CEBPB/TENM3/EGR3/BMP2/PRKCQ/BCL6/ANXA1/CCL2/PAG1	24
BP	GO:0015695	organic cation transport	5/541	36/18800	0.00349351	0.0324716	0.025414	SLC22A18/SLC7A8/SLC47A1/SLC44A4/SLC22A4	5
BP	GO:0045742	positive regulation of epidermal growth factor receptor signaling pathway	5/541	36/18800	0.00349351	0.0324716	0.025414	AGT/PLAUR/EGF/CCDC88A/AREG	5
BP	GO:0003206	cardiac chamber morphogenesis	10/541	126/18800	0.00350443	0.0324716	0.025414	SLIT3/TGFB2/BMP7/TNNT2/NRG1/NRP2/BMP2/RBP4/COL11A1/SFRP2	10
BP	GO:0030593	neutrophil chemotaxis	9/541	106/18800	0.00351282	0.0324716	0.025414	CXCL1/TGFB2/CXCL2/CXCL8/CXCL3/S100A12/CCL14/CCL15/CCL2	9
BP	GO:0042116	macrophage activation	9/541	106/18800	0.00351282	0.0324716	0.025414	TMEM106A/IL6/LRFN5/HAVCR2/LDLR/IL33/CLU/SUCNR1/MAPT	9
BP	GO:0070169	positive regulation of biomineral tissue development	6/541	52/18800	0.00366037	0.0337652	0.0264264	BMP7/PTN/CEBPB/ENAM/NELL1/BMP2	6
BP	GO:0034599	cellular response to oxidative stress	17/541	284/18800	0.00370396	0.0340964	0.0266857	PRKAA2/SLC7A11/GPR37/DHRS2/IL6/BMP7/TNFAIP3/SLC4A11/MSRA/FABP1/NR4A2/SLC1A1/CD36/ANXA1/MAPT/AQP1/H19	17
BP	GO:1903557	positive regulation of tumor necrosis factor superfamily cytokine production	9/541	107/18800	0.00374032	0.0343598	0.0268918	TMEM106A/IL6/HAVCR2/IL33/PIK3R1/CLU/NFATC4/CD36/AKAP12	9
BP	GO:0008211	glucocorticoid metabolic process	4/541	23/18800	0.00388631	0.035191	0.0275423	CYP17A1/SERPINA6/BMP2/DKK3	4
BP	GO:0016338	calcium-independent cell-cell adhesion via plasma membrane cell-adhesion molecules	4/541	23/18800	0.00388631	0.035191	0.0275423	CLDN1/CLDN5/CLDN10/BMP2	4
BP	GO:0030194	positive regulation of blood coagulation	4/541	23/18800	0.00388631	0.035191	0.0275423	PLG/HRG/APOH/CD36	4
BP	GO:0035988	chondrocyte proliferation	4/541	23/18800	0.00388631	0.035191	0.0275423	DDR2/MMP16/SIX2/FGFR3	4
BP	GO:0046618	xenobiotic export from cell	4/541	23/18800	0.00388631	0.035191	0.0275423	SLC22A18/ABCC2/SLC47A1/SLC15A2	4
BP	GO:0097164	ammonium ion metabolic process	4/541	23/18800	0.00388631	0.035191	0.0275423	ENPP6/SRD5A1/CHDH/DMGDH	4
BP	GO:1900048	positive regulation of hemostasis	4/541	23/18800	0.00388631	0.035191	0.0275423	PLG/HRG/APOH/CD36	4
BP	GO:0044272	sulfur compound biosynthetic process	11/541	149/18800	0.00393272	0.0352944	0.0276233	ACSL1/MPC2/GGT6/SLC7A11/ACAT1/GGT1/BHMT2/GGTLC1/GSTA1/SLC1A1/ST3GAL6	11
BP	GO:0002548	monocyte chemotaxis	7/541	70/18800	0.00393839	0.0352944	0.0276233	IL6/S100A12/CCL14/CCL15/PTPRO/ANXA1/CCL2	7
BP	GO:0032890	regulation of organic acid transport	7/541	70/18800	0.00393839	0.0352944	0.0276233	FABP3/ACSL1/AGT/CYP4A11/ABAT/ACE2/CYP4F2	7
BP	GO:1901607	alpha-amino acid biosynthetic process	7/541	70/18800	0.00393839	0.0352944	0.0276233	GOT1/GLS/ASL/GGT1/PSAT1/BHMT2/AGXT2	7
BP	GO:0006739	NADP metabolic process	5/541	37/18800	0.00394547	0.0352944	0.0276233	IDH2/FMO5/DCXR/ALDH1L1/ALDH1L2	5
BP	GO:1903580	positive regulation of ATP metabolic process	5/541	37/18800	0.00394547	0.0352944	0.0276233	PRKAA2/SLC4A4/ENTPD5/IGF1/GPD1	5
BP	GO:0044403	biological process involved in symbiotic interaction	17/541	286/18800	0.00397453	0.0354829	0.0277708	CLDN1/TRIM6/ICAM1/TMPRSS2/CXCL8/PLG/PC/CH25H/LDLR/ANPEP/HRG/ACE2/GSN/INHBB/LRRC19/APOE/DEFA1	17
BP	GO:0051099	positive regulation of binding	12/541	171/18800	0.00401132	0.0357394	0.0279716	ADD2/TRIM6/CLDN5/PLAUR/KLF4/EGF/PLCL1/IGF1/S100A10/BMP2/APOE/PON1	12
BP	GO:0110151	positive regulation of biomineralization	6/541	53/18800	0.00402941	0.0358287	0.0280414	BMP7/PTN/CEBPB/ENAM/NELL1/BMP2	6
BP	GO:0050866	negative regulation of cell activation	14/541	216/18800	0.00404194	0.0358682	0.0280724	ADAMTS18/TNFAIP3/TNFRSF21/LRFN5/HAVCR2/FGG/ENPP3/LDLR/ABAT/CEBPB/APOE/BCL6/ANXA1/PAG1	14
BP	GO:0044070	regulation of anion transport	8/541	89/18800	0.0040981	0.0362216	0.028349	AGT/CYP4A11/SLC34A1/ABAT/SFRP4/ACE2/CEBPB/CYP4F2	8
BP	GO:1903578	regulation of ATP metabolic process	8/541	89/18800	0.0040981	0.0362216	0.028349	PRKAA2/FBP1/AK4/SLC4A4/ENTPD5/IGF1/GPD1/H19	8
BP	GO:0006705	mineralocorticoid biosynthetic process	3/541	12/18800	0.00429412	0.0375059	0.0293541	DAB2/BMP2/DKK3	3
BP	GO:0019321	pentose metabolic process	3/541	12/18800	0.00429412	0.0375059	0.0293541	DCXR/DHDH/OTOGL	3
BP	GO:0031650	regulation of heat generation	3/541	12/18800	0.00429412	0.0375059	0.0293541	PTGER3/PTGS2/ABAT	3
BP	GO:0044650	adhesion of symbiont to host cell	3/541	12/18800	0.00429412	0.0375059	0.0293541	ICAM1/ACE2/INHBB	3
BP	GO:0090331	negative regulation of platelet aggregation	3/541	12/18800	0.00429412	0.0375059	0.0293541	ADAMTS18/FGG/ABAT	3
BP	GO:1902337	regulation of apoptotic process involved in morphogenesis	3/541	12/18800	0.00429412	0.0375059	0.0293541	TGFB2/BMP7/VDR	3
BP	GO:0001649	osteoblast differentiation	15/541	241/18800	0.00434707	0.0378938	0.0296577	SATB2/IGFBP5/DDR2/IL6/BMP7/RASSF2/IGF1/TNC/AREG/CEBPB/PTH1R/JUNB/NELL1/BMP2/SFRP2	15
BP	GO:0009132	nucleoside diphosphate metabolic process	10/541	130/18800	0.00437923	0.0380233	0.029759	PRKAA2/DHTKD1/FBP1/AK4/SLC4A4/ENTPD5/ALDOB/IGF1/GPD1/PFKFB2	10
BP	GO:0042476	odontogenesis	10/541	130/18800	0.00437923	0.0380233	0.029759	TGFB2/BMP7/SLC34A1/KLK5/ENAM/SOSTDC1/BMP2/SDC1/WDR72/AQP1	10
BP	GO:0098661	inorganic anion transmembrane transport	8/541	90/18800	0.00438763	0.0380233	0.029759	SLC4A11/SLC12A6/SLC34A1/SLC26A9/SLC12A3/SLC1A1/SLC13A1/GABRB3	8
BP	GO:0071715	icosanoid transport	6/541	54/18800	0.00442527	0.0382335	0.0299236	CYP4A11/ABCC2/ABCC6/PLA2G12B/CYP4F2/ANXA1	6
BP	GO:1901186	positive regulation of ERBB signaling pathway	5/541	38/18800	0.00443774	0.0382335	0.0299236	AGT/PLAUR/EGF/CCDC88A/AREG	5
BP	GO:1904037	positive regulation of epithelial cell apoptotic process	5/541	38/18800	0.00443774	0.0382335	0.0299236	IL6/SFRP4/GSN/CCL2/H19	5
BP	GO:0090287	regulation of cellular response to growth factor stimulus	18/541	314/18800	0.00451023	0.0387512	0.0303287	CYFIP2/AGT/CHRDL1/PRDM16/PBLD/DAB2/ADAMTS3/DCN/SFRP4/TFAP2B/HRG/SOSTDC1/FGF1/BMP2/SOST/ZNF423/SFRP2/DKK3	18
BP	GO:0042594	response to starvation	13/541	196/18800	0.0045347	0.0387512	0.0303287	PRKAA2/WNT2B/SLC39A4/SLC39A5/ACAT1/PCK2/SRD5A1/IFI16/ALB/DAPL1/UGT1A1/INHBB/AOC1	13
BP	GO:0019439	aromatic compound catabolic process	24/541	466/18800	0.00453668	0.0387512	0.0303287	ACOT7/IL6/CPEB3/ACAT1/DNASE1/UPP2/UPB1/ENTPD5/ABCC2/MOXD1/ENPP3/HPD/HGD/A1CF/ALDH1L1/KYNU/ALDH1L2/UGT1A1/ACMSD/DPYS/PDE10A/PON1/EPHX2/GDA	24
BP	GO:0003181	atrioventricular valve morphogenesis	4/541	24/18800	0.00455896	0.0387512	0.0303287	SLIT3/TGFB2/OLFM1/BMP2	4
BP	GO:0009162	deoxyribonucleoside monophosphate metabolic process	4/541	24/18800	0.00455896	0.0387512	0.0303287	UPP2/UPB1/DPYS/GDA	4
BP	GO:0042730	fibrinolysis	4/541	24/18800	0.00455896	0.0387512	0.0303287	PLG/FGG/HRG/APOH	4
BP	GO:0050820	positive regulation of coagulation	4/541	24/18800	0.00455896	0.0387512	0.0303287	PLG/HRG/APOH/CD36	4
BP	GO:0009166	nucleotide catabolic process	7/541	72/18800	0.0046083	0.0388726	0.0304238	ACOT7/ACAT1/UPP2/UPB1/DPYS/PDE10A/GDA	7
BP	GO:0042246	tissue regeneration	7/541	72/18800	0.0046083	0.0388726	0.0304238	PTN/CAPN3/KLK6/PLG/IGF1/IGFBP1/ANXA1	7
BP	GO:0050810	regulation of steroid biosynthetic process	7/541	72/18800	0.0046083	0.0388726	0.0304238	ABCG1/DAB2/CYP27B1/FGF1/BMP2/APOE/DKK3	7
BP	GO:1903036	positive regulation of response to wounding	7/541	72/18800	0.0046083	0.0388726	0.0304238	CLDN1/PTN/PLG/HRG/APOH/CD36/ANXA1	7
BP	GO:0006821	chloride transport	9/541	111/18800	0.00476802	0.0401436	0.0314185	BSND/SLC12A6/SLC26A9/SLC12A3/CLCNKB/CLCN5/WNK4/SLC1A1/GABRB3	9
BP	GO:0046890	regulation of lipid biosynthetic process	12/541	175/18800	0.00482267	0.0405269	0.0317185	FABP3/PTGS2/ABCG1/DAB2/LDLR/CYP27B1/FGF1/BMP2/APOE/ANXA1/FABP5/DKK3	12
BP	GO:0043470	regulation of carbohydrate catabolic process	6/541	55/18800	0.00484908	0.0406718	0.0318319	PRKAA2/FBP1/SLC4A4/ENTPD5/IGF1/GPD1	6
BP	GO:0035270	endocrine system development	10/541	132/18800	0.00487678	0.040827	0.0319533	IL6/SRD5A1/SALL1/WT1/BMP2/INHBB/ALDH1A2/HNF4A/ANXA1/DKK3	10
BP	GO:0048662	negative regulation of smooth muscle cell proliferation	7/541	73/18800	0.00497381	0.0414827	0.0324666	IGFBP5/TNFAIP3/OGN/ACE2/IGFBP3/BMP2/APOE	7
BP	GO:0150076	neuroinflammatory response	7/541	73/18800	0.00497381	0.0414827	0.0324666	PTGS2/IL6/IGF1/LDLR/IL33/CLU/MAPT	7
BP	GO:1903035	negative regulation of response to wounding	8/541	92/18800	0.00501365	0.0417365	0.0326652	ADAMTS18/PLG/KNG1/FGG/ABAT/HRG/APOH/APOE	8
BP	GO:0031668	cellular response to extracellular stimulus	15/541	245/18800	0.00505316	0.0419082	0.0327996	PRKAA2/WNT2B/SLC39A4/SLC39A5/PIM1/VDR/SRD5A1/NR4A2/CYP27B1/IFI16/ALB/DAPL1/INHBB/AOC1/SFRP2	15
BP	GO:0045926	negative regulation of growth	15/541	245/18800	0.00505316	0.0419082	0.0327996	AGT/IGFBP5/SLIT3/TGFB2/FBP1/DAB2/WT1/SOX17/HRG/CYP27B1/FGFR3/RBP4/BCL6/HNF4A/SFRP2	15
BP	GO:0030048	actin filament-based movement	10/541	133/18800	0.00514166	0.0425626	0.0333117	MYH8/KCNJ3/VIL1/TNNT2/KCNJ2/SCN2B/MYO6/GSN/KCNE1/NEDD4L	10
BP	GO:0034329	cell junction assembly	22/541	420/18800	0.00529325	0.0435148	0.034057	LRRTM1/RAB29/CLDN1/AGT/ADD2/CLDN5/FLRT2/PECAM1/LRFN5/DNER/NRG1/MARVELD3/S100A10/HRG/ACE2/CLDN10/TPBG/GABRB3/UGT8/ILDR1/PTPRO/FARP1	22
BP	GO:0031639	plasminogen activation	4/541	25/18800	0.00530572	0.0435148	0.034057	FGG/S100A10/CLEC3B/APOH	4
BP	GO:0042178	xenobiotic catabolic process	4/541	25/18800	0.00530572	0.0435148	0.034057	ACSL1/FMO4/UGT1A1/CYP2B6	4
BP	GO:0042430	indole-containing compound metabolic process	4/541	25/18800	0.00530572	0.0435148	0.034057	SRD5A1/SLC34A1/KYNU/ACMSD	4
BP	GO:2000193	positive regulation of fatty acid transport	4/541	25/18800	0.00530572	0.0435148	0.034057	FABP3/ACSL1/CYP4A11/CYP4F2	4
BP	GO:0034109	homotypic cell-cell adhesion	8/541	93/18800	0.00535119	0.0438038	0.0342832	ADAMTS18/SLC7A11/IL6/CDHR5/PLAUR/FGG/ABAT/PRKCQ	8
BP	GO:0035924	cellular response to vascular endothelial growth factor stimulus	7/541	74/18800	0.00536071	0.0438038	0.0342832	ADAMTS3/DCN/HRG/NRP2/EGR3/ANXA1/GAS1	7
BP	GO:0006521	regulation of cellular amino acid metabolic process	3/541	13/18800	0.00546408	0.0438411	0.0343124	SLC7A11/SLC7A7/ACMSD	3
BP	GO:0009176	pyrimidine deoxyribonucleoside monophosphate metabolic process	3/541	13/18800	0.00546408	0.0438411	0.0343124	UPP2/UPB1/DPYS	3
BP	GO:0031392	regulation of prostaglandin biosynthetic process	3/541	13/18800	0.00546408	0.0438411	0.0343124	PTGS2/ANXA1/FABP5	3
BP	GO:0032341	aldosterone metabolic process	3/541	13/18800	0.00546408	0.0438411	0.0343124	DAB2/BMP2/DKK3	3
BP	GO:0032536	regulation of cell projection size	3/541	13/18800	0.00546408	0.0438411	0.0343124	VIL1/CDHR5/USH1C	3
BP	GO:0042363	fat-soluble vitamin catabolic process	3/541	13/18800	0.00546408	0.0438411	0.0343124	CYP27B1/CYP4F3/CYP4F2	3
BP	GO:0090030	regulation of steroid hormone biosynthetic process	3/541	13/18800	0.00546408	0.0438411	0.0343124	DAB2/BMP2/DKK3	3
BP	GO:1900426	positive regulation of defense response to bacterium	3/541	13/18800	0.00546408	0.0438411	0.0343124	KLK7/HAVCR2/KLK5	3
BP	GO:1904748	regulation of apoptotic process involved in development	3/541	13/18800	0.00546408	0.0438411	0.0343124	TGFB2/BMP7/VDR	3
BP	GO:1905907	negative regulation of amyloid fibril formation	3/541	13/18800	0.00546408	0.0438411	0.0343124	LDLR/CLU/APOE	3
BP	GO:0019432	triglyceride biosynthetic process	5/541	40/18800	0.00555074	0.044456	0.0347936	ACSL1/GK/PCK2/LDLR/PNPLA3	5
BP	GO:1904035	regulation of epithelial cell apoptotic process	8/541	94/18800	0.00570581	0.0456157	0.0357012	ICAM1/IL6/TNFAIP3/FGG/SFRP4/GSN/CCL2/H19	8
BP	GO:0021536	diencephalon development	7/541	75/18800	0.00576973	0.0460437	0.0360363	SRD5A1/SALL1/NR4A2/NRP2/BMP2/INHBB/ALDH1A2	7
BP	GO:0023061	signal release	23/541	451/18800	0.00605545	0.0482089	0.0377308	HADH/MPC2/AGT/MCTP2/IL6/TM7SF3/SYT1/PCK2/MYRIP/FGG/DAB2/ABAT/SCG5/TFAP2B/CRHBP/PFKFB2/INHBB/RBP4/SUCNR1/ILDR1/HNF4A/ANXA1/SLC44A4	23
BP	GO:0000302	response to reactive oxygen species	13/541	203/18800	0.00606278	0.0482089	0.0377308	GPR37/IL6/BMP7/TNFAIP3/FABP1/AREG/APOE/SDC1/CD36/ANXA1/MAPT/AQP1/H19	13
BP	GO:0003073	regulation of systemic arterial blood pressure	8/541	95/18800	0.00607805	0.0482439	0.0377582	AGT/CYP4A11/SLC2A5/ACE2/CYP4F2/KLK1/SUCNR1/PTPRO	8
BP	GO:0006972	hyperosmotic response	4/541	26/18800	0.00613004	0.0483968	0.0378779	SST/EFHD1/CLDN1/AQP1	4
BP	GO:0007350	blastoderm segmentation	4/541	26/18800	0.00613004	0.0483968	0.0378779	WT1/BASP1/NRP2/TDGF1	4
BP	GO:0072010	glomerular epithelium development	4/541	26/18800	0.00613004	0.0483968	0.0378779	PECAM1/WT1/BASP1/PTPRO	4
BP	GO:0021983	pituitary gland development	5/541	41/18800	0.00617519	0.0484943	0.0379542	SRD5A1/SALL1/BMP2/INHBB/ALDH1A2	5
BP	GO:0120178	steroid hormone biosynthetic process	5/541	41/18800	0.00617519	0.0484943	0.0379542	CYP17A1/SRD5A1/DAB2/BMP2/DKK3	5
BP	GO:0150077	regulation of neuroinflammatory response	5/541	41/18800	0.00617519	0.0484943	0.0379542	PTGS2/IL6/IGF1/LDLR/IL33	5
BP	GO:0052548	regulation of endopeptidase activity	22/541	426/18800	0.00622306	0.0487839	0.0381809	CYFIP2/AGT/CARD16/PTGS2/VIL1/LPA/KNG1/PLAUR/KLF4/FABP1/SERPINA6/TFPI2/HRG/GSN/SERPINA5/IFI16/SLC1A1/SLPI/DPEP1/MAPT/SFRP2/AQP1	22
BP	GO:0019369	arachidonic acid metabolic process	6/541	58/18800	0.00629946	0.049209	0.0385136	PTGS2/CYP4A11/PTGDS/CYP4F3/CYP4F2/CYP2B6	6
BP	GO:0090303	positive regulation of wound healing	6/541	58/18800	0.00629946	0.049209	0.0385136	CLDN1/PLG/HRG/APOH/CD36/ANXA1	6
BP	GO:1990845	adaptive thermogenesis	11/541	159/18800	0.00638317	0.0497753	0.0389568	HADH/ACSL1/PRDM16/PLCL1/PRLR/FABP4/ESRRG/CEBPB/ZNF423/CD36/FABP5	11
BP	GO:0042552	myelination	10/541	138/18800	0.00663946	0.0516697	0.0404395	PTN/CLDN5/TNFRSF21/KLK6/JAM2/NRG1/KCNJ10/CLU/UGT8/EGR2	10
BP	GO:0006720	isoprenoid metabolic process	9/541	117/18800	0.00670592	0.0516697	0.0404395	PHYH/ADH6/PDSS1/SRD5A1/RDH12/UGT1A1/ALDH1A2/RBP4/RARRES2	9
BP	GO:2000116	regulation of cysteine-type endopeptidase activity	14/541	229/18800	0.00671219	0.0516697	0.0404395	CYFIP2/CARD16/PTGS2/VIL1/PLAUR/KLF4/FABP1/GSN/IFI16/SLC1A1/DPEP1/MAPT/SFRP2/AQP1	14
BP	GO:0032102	negative regulation of response to external stimulus	22/541	429/18800	0.00673611	0.0516697	0.0404395	ADAMTS18/CARD16/TNFAIP3/SOCS3/MMP28/LRFN5/PLG/KNG1/HAVCR2/KLF4/FGG/IGF1/ENPP3/LDLR/ABAT/HRG/ANGPT2/IFI16/APOH/APOE/PTPRO/CCL2	22
BP	GO:0002467	germinal center formation	3/541	14/18800	0.00680717	0.0516697	0.0404395	TNFSF13B/TNFAIP3/BCL6	3
BP	GO:0007171	activation of transmembrane receptor protein tyrosine kinase activity	3/541	14/18800	0.00680717	0.0516697	0.0404395	EGF/NRG1/PRLR	3
BP	GO:0008212	mineralocorticoid metabolic process	3/541	14/18800	0.00680717	0.0516697	0.0404395	DAB2/BMP2/DKK3	3
BP	GO:0009158	ribonucleoside monophosphate catabolic process	3/541	14/18800	0.00680717	0.0516697	0.0404395	UPB1/DPYS/GDA	3
BP	GO:0010872	regulation of cholesterol esterification	3/541	14/18800	0.00680717	0.0516697	0.0404395	AGT/ABCG1/APOE	3
BP	GO:0015697	quaternary ammonium group transport	3/541	14/18800	0.00680717	0.0516697	0.0404395	SLC25A48/SLC44A4/SLC22A4	3
BP	GO:0034111	negative regulation of homotypic cell-cell adhesion	3/541	14/18800	0.00680717	0.0516697	0.0404395	ADAMTS18/FGG/ABAT	3
BP	GO:0034309	primary alcohol biosynthetic process	3/541	14/18800	0.00680717	0.0516697	0.0404395	DAB2/BMP2/DKK3	3
BP	GO:0035672	oligopeptide transmembrane transport	3/541	14/18800	0.00680717	0.0516697	0.0404395	SLC7A11/SLC13A3/SLC15A2	3
BP	GO:0042136	neurotransmitter biosynthetic process	3/541	14/18800	0.00680717	0.0516697	0.0404395	MOXD1/GAD1/SLC44A4	3
BP	GO:0051917	regulation of fibrinolysis	3/541	14/18800	0.00680717	0.0516697	0.0404395	PLG/HRG/APOH	3
BP	GO:0008217	regulation of blood pressure	12/541	183/18800	0.00683651	0.0516697	0.0404395	AGT/PTGS2/CYP4A11/SLC2A5/ABAT/ANPEP/ACE2/CYP4F2/KLK1/ACSM3/SUCNR1/PTPRO	12
BP	GO:0030574	collagen catabolic process	5/541	42/18800	0.00684737	0.0516697	0.0404395	MMP28/PEPD/KLK6/MMP16/ADAMTS3	5
BP	GO:0055090	acylglycerol homeostasis	5/541	42/18800	0.00684737	0.0516697	0.0404395	ANGPTL3/PLA2G12B/APOE/ACSM2A/HNF4A	5
BP	GO:0070328	triglyceride homeostasis	5/541	42/18800	0.00684737	0.0516697	0.0404395	ANGPTL3/PLA2G12B/APOE/ACSM2A/HNF4A	5
BP	GO:0010594	regulation of endothelial cell migration	14/541	230/18800	0.00696516	0.0523746	0.0409912	AGT/PTGS2/PTN/KLF4/EGF/DCN/HRG/ANGPT2/NRP2/FGF1/APOH/TDGF1/APOE/ANXA1	14
BP	GO:0003171	atrioventricular valve development	4/541	27/18800	0.00703522	0.0523746	0.0409912	SLIT3/TGFB2/OLFM1/BMP2	4
BP	GO:0010894	negative regulation of steroid biosynthetic process	4/541	27/18800	0.00703522	0.0523746	0.0409912	CYP27B1/BMP2/APOE/DKK3	4
BP	GO:0035640	exploration behavior	4/541	27/18800	0.00703522	0.0523746	0.0409912	LRRTM1/ABAT/GAD1/APOE	4
BP	GO:0045606	positive regulation of epidermal cell differentiation	4/541	27/18800	0.00703522	0.0523746	0.0409912	VDR/ZBED2/SFRP4/CYP27B1	4
BP	GO:0046174	polyol catabolic process	4/541	27/18800	0.00703522	0.0523746	0.0409912	GK/IMPA2/MIOX/SORD	4
BP	GO:0072012	glomerulus vasculature development	4/541	27/18800	0.00703522	0.0523746	0.0409912	BMP7/PECAM1/WT1/ANGPT2	4
BP	GO:1903055	positive regulation of extracellular matrix organization	4/541	27/18800	0.00703522	0.0523746	0.0409912	AGT/DDR2/IL6/BMP2	4
BP	GO:0043542	endothelial cell migration	16/541	279/18800	0.00714749	0.0531213	0.0415756	AGT/PTGS2/PTN/S100P/KLF4/EGF/DCN/HRG/ANGPT2/NRP2/EGR3/FGF1/APOH/TDGF1/APOE/ANXA1	16
BP	GO:0006633	fatty acid biosynthetic process	11/541	162/18800	0.00731378	0.0540817	0.0423272	ACOT7/PRKAA2/PTGS2/ACOT4/SCD5/ACSM2B/PTGDS/ACSM3/ACSM2A/ANXA1/FABP5	11
BP	GO:0030509	BMP signaling pathway	11/541	162/18800	0.00731378	0.0540817	0.0423272	TGFB2/BMP7/SLC39A5/CHRDL1/SFRP4/TFAP2B/SOSTDC1/BMP2/SOST/ZNF423/SFRP2	11
BP	GO:0007272	ensheathment of neurons	10/541	140/18800	0.00732547	0.0540817	0.0423272	PTN/CLDN5/TNFRSF21/KLK6/JAM2/NRG1/KCNJ10/CLU/UGT8/EGR2	10
BP	GO:0008366	axon ensheathment	10/541	140/18800	0.00732547	0.0540817	0.0423272	PTN/CLDN5/TNFRSF21/KLK6/JAM2/NRG1/KCNJ10/CLU/UGT8/EGR2	10
BP	GO:0008544	epidermis development	19/541	355/18800	0.00737034	0.0543226	0.0425158	BNC1/KLK7/IGFBP5/TGFB2/VDR/KLF4/MYO6/EMP1/ZBED2/KLK5/SFRP4/CYP27B1/MAFF/SOSTDC1/USH1C/ANXA1/FABP5/SLC9A3R1/SLC44A4	19
BP	GO:0007162	negative regulation of cell adhesion	17/541	305/18800	0.00745036	0.0548213	0.0429061	ADAMTS18/TNFRSF21/PLG/KNG1/HAVCR2/KLF4/FGG/ABAT/HRG/PIK3R1/CEBPB/ANGPT2/BMP2/PTPRO/BCL6/ANXA1/PAG1	17
BP	GO:0007548	sex differentiation	16/541	281/18800	0.00763133	0.05606	0.0438755	WNT2B/SLIT3/TGFB2/GFRA1/CYP17A1/SRD5A1/SALL1/WT1/BASP1/CEBPB/DMRT2/INHBB/RBP4/SDC1/HNF4A/SFRP2	16
BP	GO:0050678	regulation of epithelial cell proliferation	20/541	382/18800	0.0076645	0.0562105	0.0439933	CLDN1/TGFB2/TNFAIP3/PTN/VDR/EGF/DAB2/MARVELD3/IGF1/AREG/NRP2/AQP11/EGR3/FGF1/BMP2/APOH/ALDH1A2/APOE/SFRP2/CCL2	20
BP	GO:0090066	regulation of anatomical structure size	24/541	487/18800	0.00769838	0.0563658	0.0441149	CYFIP2/PAK3/AGT/ADD2/PTGS2/VIL1/CDHR5/SLC12A6/PPP1R15A/KNG1/FGG/SLC12A3/OLFM1/HRH1/ACE2/GSN/AQP11/KCNMB2/USH1C/APOE/MAPT/CDC42EP5/AQP1/SLC9A3R1	24
BP	GO:0030308	negative regulation of cell growth	12/541	186/18800	0.00774329	0.0565868	0.0442878	AGT/SLIT3/TGFB2/FBP1/DAB2/WT1/SOX17/HRG/CYP27B1/BCL6/HNF4A/SFRP2	12
BP	GO:1990830	cellular response to leukemia inhibitory factor	8/541	99/18800	0.00775406	0.0565868	0.0442878	ICAM1/SOCS3/KLF4/GFPT2/SOX17/NRP2/ILDR1/PCOLCE2	8
BP	GO:0033002	muscle cell proliferation	14/541	233/18800	0.00776998	0.0566099	0.0443059	AGT/IGFBP5/TGFB2/PTGS2/IL6/TNFAIP3/PIM1/IGF1/OGN/ACE2/IGFBP3/BMP2/RBP4/APOE	14
BP	GO:0006829	zinc ion transport	4/541	28/18800	0.00802442	0.0583678	0.0456817	SLC39A4/SLC39A5/SLC30A9/SLC1A1	4
BP	GO:0045428	regulation of nitric oxide biosynthetic process	6/541	61/18800	0.00804196	0.0583996	0.0457067	AGT/PTGS2/KLF4/CLU/AGXT2/CD36	6
BP	GO:1990823	response to leukemia inhibitory factor	8/541	100/18800	0.00822258	0.0588455	0.0460556	ICAM1/SOCS3/KLF4/GFPT2/SOX17/NRP2/ILDR1/PCOLCE2	8
BP	GO:0038127	ERBB signaling pathway	9/541	121/18800	0.00829999	0.0588455	0.0460556	AGT/VIL1/RASSF2/PLAUR/EGF/NRG1/CCDC88A/KIF16B/AREG	9
BP	GO:0001977	renal system process involved in regulation of blood volume	3/541	15/18800	0.00832924	0.0588455	0.0460556	CYP4A11/CYP4F2/PTPRO	3
BP	GO:0006570	tyrosine metabolic process	3/541	15/18800	0.00832924	0.0588455	0.0460556	IYD/HPD/HGD	3
BP	GO:0006704	glucocorticoid biosynthetic process	3/541	15/18800	0.00832924	0.0588455	0.0460556	CYP17A1/BMP2/DKK3	3
BP	GO:0009111	vitamin catabolic process	3/541	15/18800	0.00832924	0.0588455	0.0460556	CYP27B1/CYP4F3/CYP4F2	3
BP	GO:0009173	pyrimidine ribonucleoside monophosphate metabolic process	3/541	15/18800	0.00832924	0.0588455	0.0460556	UPP2/UPB1/DPYS	3
BP	GO:0010763	positive regulation of fibroblast migration	3/541	15/18800	0.00832924	0.0588455	0.0460556	PAK3/DDR2/AKAP12	3
BP	GO:0034384	high-density lipoprotein particle clearance	3/541	15/18800	0.00832924	0.0588455	0.0460556	APOM/LDLR/APOE	3
BP	GO:0044406	adhesion of symbiont to host	3/541	15/18800	0.00832924	0.0588455	0.0460556	ICAM1/ACE2/INHBB	3
BP	GO:0046049	UMP metabolic process	3/541	15/18800	0.00832924	0.0588455	0.0460556	UPP2/UPB1/DPYS	3
BP	GO:0060572	morphogenesis of an epithelial bud	3/541	15/18800	0.00832924	0.0588455	0.0460556	WNT2B/BMP7/SOSTDC1	3
BP	GO:0070365	hepatocyte differentiation	3/541	15/18800	0.00832924	0.0588455	0.0460556	PCK2/HNF4A/ANXA1	3
BP	GO:0072075	metanephric mesenchyme development	3/541	15/18800	0.00832924	0.0588455	0.0460556	BMP7/WT1/BASP1	3
BP	GO:2000345	regulation of hepatocyte proliferation	3/541	15/18800	0.00832924	0.0588455	0.0460556	TNFAIP3/PTN/FGF1	3
BP	GO:2001279	regulation of unsaturated fatty acid biosynthetic process	3/541	15/18800	0.00832924	0.0588455	0.0460556	PTGS2/ANXA1/FABP5	3
BP	GO:0045981	positive regulation of nucleotide metabolic process	5/541	44/18800	0.00834208	0.0588455	0.0460556	PRKAA2/SLC4A4/ENTPD5/IGF1/GPD1	5
BP	GO:1900544	positive regulation of purine nucleotide metabolic process	5/541	44/18800	0.00834208	0.0588455	0.0460556	PRKAA2/SLC4A4/ENTPD5/IGF1/GPD1	5
BP	GO:0022617	extracellular matrix disassembly	6/541	62/18800	0.00869291	0.0612131	0.0479086	KLK7/DDR2/IL6/PLG/KLK5/WDR72	6
BP	GO:0030500	regulation of bone mineralization	7/541	81/18800	0.00873112	0.0612131	0.0479086	DDR2/BMP7/PTN/OMD/CYP27B1/NELL1/BMP2	7
BP	GO:0046209	nitric oxide metabolic process	7/541	81/18800	0.00873112	0.0612131	0.0479086	AGT/TMEM106A/PTGS2/KLF4/CLU/AGXT2/CD36	7
BP	GO:1901653	cellular response to peptide	19/541	361/18800	0.0087329	0.0612131	0.0479086	ECHDC3/AGT/ICAM1/GOT1/SOCS3/PCK2/FBP1/SRD5A1/IGF1/NR4A2/PIK3R1/CRHBP/SLC22A12/PNPLA3/INHBB/PRKCQ/IGFBP1/CD36/RARRES2	19
BP	GO:0030177	positive regulation of Wnt signaling pathway	10/541	144/18800	0.00886072	0.0619221	0.0484635	TNFAIP3/EGF/SALL1/DAB2/SFRP4/BMP2/DKK2/SFRP2/RSPO1/GPC5	10
BP	GO:0050730	regulation of peptidyl-tyrosine phosphorylation	15/541	261/18800	0.00886197	0.0619221	0.0484635	AGT/IL6/GFRA1/SOCS3/PECAM1/EGF/NRG1/IGF1/HRG/AREG/TDGF1/FGFR3/CD36/TSLP/SFRP2	15
BP	GO:0031669	cellular response to nutrient levels	13/541	213/18800	0.00892893	0.0622919	0.048753	PRKAA2/WNT2B/SLC39A4/SLC39A5/PIM1/VDR/SRD5A1/CYP27B1/IFI16/ALB/DAPL1/INHBB/AOC1	13
BP	GO:0050731	positive regulation of peptidyl-tyrosine phosphorylation	12/541	190/18800	0.00909606	0.0627011	0.0490732	AGT/IL6/GFRA1/PECAM1/EGF/NRG1/IGF1/AREG/TDGF1/FGFR3/CD36/TSLP	12
BP	GO:0003205	cardiac chamber development	11/541	167/18800	0.00909634	0.0627011	0.0490732	SLIT3/TGFB2/BMP7/TNNT2/NRG1/SALL1/NRP2/BMP2/RBP4/COL11A1/SFRP2	11
BP	GO:0051048	negative regulation of secretion	11/541	167/18800	0.00909634	0.0627011	0.0490732	HADH/PTGER3/EGF/NRG1/ABAT/WNK4/CRHBP/CYP4F2/INHBB/APOE/ANXA1	11
BP	GO:0009264	deoxyribonucleotide catabolic process	4/541	29/18800	0.00910064	0.0627011	0.0490732	UPP2/UPB1/DPYS/GDA	4
BP	GO:0015701	bicarbonate transport	4/541	29/18800	0.00910064	0.0627011	0.0490732	SLC4A11/SLC4A4/SLC26A9/CA4	4
BP	GO:0015813	L-glutamate transmembrane transport	4/541	29/18800	0.00910064	0.0627011	0.0490732	SLC7A13/SLC7A11/KCNJ10/SLC1A1	4
BP	GO:0061437	renal system vasculature development	4/541	29/18800	0.00910064	0.0627011	0.0490732	BMP7/PECAM1/WT1/ANGPT2	4
BP	GO:0061440	kidney vasculature development	4/541	29/18800	0.00910064	0.0627011	0.0490732	BMP7/PECAM1/WT1/ANGPT2	4
BP	GO:0071827	plasma lipoprotein particle organization	5/541	45/18800	0.00916807	0.0630678	0.0493602	AGT/ABCG1/MTTP/APOM/APOE	5
BP	GO:0010717	regulation of epithelial to mesenchymal transition	8/541	102/18800	0.00922287	0.0633466	0.0495784	TGFB2/IL6/BMP7/OLFM1/DAB2/GLIPR2/BMP2/SFRP2	8
BP	GO:0051223	regulation of protein transport	24/541	495/18800	0.00930156	0.0637883	0.0499241	HADH/MPC2/RAB29/TGFB2/PTGS2/SLC7A11/IL6/TM7SF3/ABCG1/PCK2/MYRIP/FGG/IGF1/ABAT/TFAP2B/PIK3R1/KCNE1/SLC1A1/PFKFB2/INHBB/RBP4/APOE/CD36/HNF4A	24
BP	GO:2001057	reactive nitrogen species metabolic process	7/541	82/18800	0.0093163	0.0637908	0.0499261	AGT/TMEM106A/PTGS2/KLF4/CLU/AGXT2/CD36	7
BP	GO:0006767	water-soluble vitamin metabolic process	6/541	63/18800	0.00938074	0.063936	0.0500397	CLYBL/SLC23A1/SLC2A3/CUBN/PSAT1/ALDH1L2	6
BP	GO:0015800	acidic amino acid transport	6/541	63/18800	0.00938074	0.063936	0.0500397	SLC7A13/SLC7A11/ABAT/KCNJ10/SLC1A1/SLC9A3R1	6
BP	GO:0046173	polyol biosynthetic process	6/541	63/18800	0.00938074	0.063936	0.0500397	GOT1/PCK2/IMPA2/HRH1/CYP27B1/PTH1R	6
BP	GO:0031589	cell-substrate adhesion	19/541	364/18800	0.00948659	0.0645583	0.0505267	COL26A1/ATRNL1/VWF/ANGPTL3/PLG/FGG/CCDC80/DAB2/S100A10/HRG/PIK3R1/ANGPT2/NID2/ANTXR1/PTPRO/CD36/BCL6/COL8A1/MSLN	19
BP	GO:0046700	heterocycle catabolic process	22/541	443/18800	0.00961005	0.0652983	0.0511059	ACOT7/IL6/CPEB3/ACAT1/ALDH6A1/DNASE1/UPP2/UPB1/ENTPD5/ABCC2/ENPP3/AKR7A3/A1CF/ALDH1L1/KYNU/ALDH1L2/UGT1A1/DPEP1/ACMSD/DPYS/PDE10A/GDA	22
BP	GO:0030522	intracellular receptor signaling pathway	15/541	264/18800	0.00978028	0.0663534	0.0519317	ZNF536/TNFAIP3/PIM1/VDR/DAB2/NR4A2/ESRRG/CYP27B1/BMP2/ALDH1A2/HNF4G/HNF4A/DEFA1/SLC15A2/FABP5	15
BP	GO:0001780	neutrophil homeostasis	3/541	16/18800	0.0100352	0.0667459	0.0522389	SLC7A11/IL6/ANXA1	3
BP	GO:0030002	cellular anion homeostasis	3/541	16/18800	0.0100352	0.0667459	0.0522389	SLC34A1/ABCC6/SLC9A3R1	3
BP	GO:0031649	heat generation	3/541	16/18800	0.0100352	0.0667459	0.0522389	PTGER3/PTGS2/ABAT	3
BP	GO:0034349	glial cell apoptotic process	3/541	16/18800	0.0100352	0.0667459	0.0522389	TNFRSF21/CCL2/AKAP12	3
BP	GO:0034375	high-density lipoprotein particle remodeling	3/541	16/18800	0.0100352	0.0667459	0.0522389	ABCG1/APOM/APOE	3
BP	GO:0042159	lipoprotein catabolic process	3/541	16/18800	0.0100352	0.0667459	0.0522389	ABHD17C/LDLR/APOE	3
BP	GO:0046184	aldehyde biosynthetic process	3/541	16/18800	0.0100352	0.0667459	0.0522389	DAB2/BMP2/DKK3	3
BP	GO:0051938	L-glutamate import	3/541	16/18800	0.0100352	0.0667459	0.0522389	SLC7A11/KCNJ10/SLC1A1	3
BP	GO:0055064	chloride ion homeostasis	3/541	16/18800	0.0100352	0.0667459	0.0522389	SLC12A6/SLC12A3/CA12	3
BP	GO:0055083	monovalent inorganic anion homeostasis	3/541	16/18800	0.0100352	0.0667459	0.0522389	SLC12A6/SLC12A3/CA12	3
BP	GO:0090336	positive regulation of brown fat cell differentiation	3/541	16/18800	0.0100352	0.0667459	0.0522389	PTGS2/BMP7/PIM1	3
BP	GO:0098712	L-glutamate import across plasma membrane	3/541	16/18800	0.0100352	0.0667459	0.0522389	SLC7A11/KCNJ10/SLC1A1	3
BP	GO:1905906	regulation of amyloid fibril formation	3/541	16/18800	0.0100352	0.0667459	0.0522389	LDLR/CLU/APOE	3
BP	GO:0042398	cellular modified amino acid biosynthetic process	5/541	46/18800	0.0100487	0.0667459	0.0522389	GGT6/SLC7A11/GGT1/CHDH/SLC1A1	5
BP	GO:0019229	regulation of vasoconstriction	6/541	64/18800	0.0101065	0.0670294	0.0524608	AGT/PTGS2/FGG/HRH1/ACE2/KCNMB2	6
BP	GO:0001890	placenta development	10/541	147/18800	0.0101654	0.067219	0.0526092	PTGS2/BMP7/PTN/SOCS3/VDR/PLG/CEBPB/CYP27B1/JUNB/KRT19	10
BP	GO:0034614	cellular response to reactive oxygen species	10/541	147/18800	0.0101654	0.067219	0.0526092	GPR37/IL6/BMP7/TNFAIP3/FABP1/CD36/ANXA1/MAPT/AQP1/H19	10
BP	GO:0046386	deoxyribose phosphate catabolic process	4/541	30/18800	0.0102667	0.0677876	0.0530542	UPP2/UPB1/DPYS/GDA	4
BP	GO:0048660	regulation of smooth muscle cell proliferation	11/541	170/18800	0.0103166	0.0680158	0.0532328	AGT/IGFBP5/PTGS2/IL6/TNFAIP3/IGF1/OGN/ACE2/IGFBP3/BMP2/APOE	11
BP	GO:0010810	regulation of cell-substrate adhesion	13/541	217/18800	0.0103361	0.0680435	0.0532544	COL26A1/PLG/FGG/CCDC80/DAB2/S100A10/HRG/PIK3R1/ANGPT2/PTPRO/CD36/BCL6/COL8A1	13
BP	GO:0097006	regulation of plasma lipoprotein particle levels	7/541	84/18800	0.010572	0.069493	0.0543889	AGT/ABCG1/MTTP/APOM/LDLR/APOE/CD36	7
BP	GO:0019318	hexose metabolic process	14/541	242/18800	0.0106346	0.0698011	0.0546301	DCXR/PCK2/FBP1/KHK/PC/ALDOB/IGF1/GPD1/SORD/TFAP2B/PFKFB2/RBP4/FABP5/FUT6	14
BP	GO:0090092	regulation of transmembrane receptor protein serine/threonine kinase signaling pathway	15/541	267/18800	0.0107722	0.0706001	0.0552554	TGFB2/BMP7/CHRDL1/PRDM16/PBLD/DAB2/SFRP4/TFAP2B/SOSTDC1/BMP2/INHBB/SOST/ZNF423/SFRP2/DKK3	15
BP	GO:0016126	sterol biosynthetic process	6/541	65/18800	0.0108714	0.0710401	0.0555997	PRKAA2/ABCG1/ACAA2/CH25H/FGF1/APOE	6
BP	GO:1905330	regulation of morphogenesis of an epithelium	6/541	65/18800	0.0108714	0.0710401	0.0555997	AGT/WNT2B/BMP7/EGF/SIX2/FGF1	6
BP	GO:0046486	glycerolipid metabolic process	20/541	396/18800	0.0111066	0.072301	0.0565866	FABP3/ACSL1/PLD1/SOCS3/GK/PCK2/MTTP/IMPA2/ENPP6/LDLR/GPD1/AGPAT3/PIK3R1/PNPLA3/APOH/APOE/PON1/FABP5/SLC44A4/SLC22A4	20
BP	GO:0044270	cellular nitrogen compound catabolic process	22/541	449/18800	0.011113	0.072301	0.0565866	ACOT7/IL6/CPEB3/ACAT1/ALDH6A1/DNASE1/UPP2/UPB1/ENTPD5/ABCC2/ENPP3/A1CF/ALDH1L1/KYNU/ALDH1L2/UGT1A1/DMGDH/DPEP1/ACMSD/DPYS/PDE10A/GDA	22
BP	GO:0007043	cell-cell junction assembly	10/541	149/18800	0.0111132	0.072301	0.0565866	CLDN1/AGT/CLDN5/PECAM1/MARVELD3/ACE2/CLDN10/UGT8/ILDR1/PTPRO	10
BP	GO:0071375	cellular response to peptide hormone stimulus	16/541	294/18800	0.0114517	0.0742198	0.0580884	ECHDC3/AGT/GOT1/SOCS3/PCK2/FBP1/SRD5A1/NR4A2/PIK3R1/CRHBP/SLC22A12/PNPLA3/INHBB/PRKCQ/IGFBP1/RARRES2	16
BP	GO:0006884	cell volume homeostasis	4/541	31/18800	0.0115252	0.0742198	0.0580884	SLC12A6/SLC12A3/AQP11/AQP1	4
BP	GO:0043171	peptide catabolic process	4/541	31/18800	0.0115252	0.0742198	0.0580884	GGT1/GGTLC1/ANPEP/DPEP1	4
BP	GO:0061384	heart trabecula morphogenesis	4/541	31/18800	0.0115252	0.0742198	0.0580884	TGFB2/BMP7/NRG1/RBP4	4
BP	GO:0070633	transepithelial transport	4/541	31/18800	0.0115252	0.0742198	0.0580884	ABCC2/SLC1A1/RHCG/AQP1	4
BP	GO:0072525	pyridine-containing compound biosynthetic process	4/541	31/18800	0.0115252	0.0742198	0.0580884	NAMPT/PSAT1/KYNU/ACMSD	4
BP	GO:1902042	negative regulation of extrinsic apoptotic signaling pathway via death domain receptors	4/541	31/18800	0.0115252	0.0742198	0.0580884	ICAM1/TNFAIP3/FGG/SFRP2	4
BP	GO:0048659	smooth muscle cell proliferation	11/541	173/18800	0.0116588	0.0747543	0.0585067	AGT/IGFBP5/PTGS2/IL6/TNFAIP3/IGF1/OGN/ACE2/IGFBP3/BMP2/APOE	11
BP	GO:0071772	response to BMP	11/541	173/18800	0.0116588	0.0747543	0.0585067	TGFB2/BMP7/SLC39A5/CHRDL1/SFRP4/TFAP2B/SOSTDC1/BMP2/SOST/ZNF423/SFRP2	11
BP	GO:0071773	cellular response to BMP stimulus	11/541	173/18800	0.0116588	0.0747543	0.0585067	TGFB2/BMP7/SLC39A5/CHRDL1/SFRP4/TFAP2B/SOSTDC1/BMP2/SOST/ZNF423/SFRP2	11
BP	GO:0032835	glomerulus development	6/541	66/18800	0.0116763	0.0747583	0.0585098	BMP7/PECAM1/WT1/BASP1/ANGPT2/PTPRO	6
BP	GO:0030336	negative regulation of cell migration	18/541	346/18800	0.0117489	0.0751151	0.058789	IGFBP5/MMP28/CLDN5/KLF4/NRG1/MARVELD3/HAS1/DCN/HRG/ANGPT2/NAV3/IGFBP3/APOH/APOE/DPEP1/SFRP2/CCL2/SLC9A3R1	18
BP	GO:0001710	mesodermal cell fate commitment	3/541	17/18800	0.011929	0.0755083	0.0590968	KLF4/SIX2/SFRP2	3
BP	GO:0006103	2-oxoglutarate metabolic process	3/541	17/18800	0.011929	0.0755083	0.0590968	IDH2/PHYH/GOT1	3
BP	GO:0006577	amino-acid betaine metabolic process	3/541	17/18800	0.011929	0.0755083	0.0590968	CHDH/DMGDH/SLC22A4	3
BP	GO:0010566	regulation of ketone biosynthetic process	3/541	17/18800	0.011929	0.0755083	0.0590968	DAB2/BMP2/DKK3	3
BP	GO:0055089	fatty acid homeostasis	3/541	17/18800	0.011929	0.0755083	0.0590968	PRKAA2/GOT1/APOE	3
BP	GO:0006953	acute-phase response	5/541	48/18800	0.0119806	0.0755083	0.0590968	PTGER3/PTGS2/IL6/CEBPB/UGT1A1	5
BP	GO:0035850	epithelial cell differentiation involved in kidney development	5/541	48/18800	0.0119806	0.0755083	0.0590968	SIX2/SALL1/WT1/BASP1/PTPRO	5
BP	GO:0046460	neutral lipid biosynthetic process	5/541	48/18800	0.0119806	0.0755083	0.0590968	ACSL1/GK/PCK2/LDLR/PNPLA3	5
BP	GO:0046463	acylglycerol biosynthetic process	5/541	48/18800	0.0119806	0.0755083	0.0590968	ACSL1/GK/PCK2/LDLR/PNPLA3	5
BP	GO:0071825	protein-lipid complex subunit organization	5/541	48/18800	0.0119806	0.0755083	0.0590968	AGT/ABCG1/MTTP/APOM/APOE	5
BP	GO:0010634	positive regulation of epithelial cell migration	11/541	174/18800	0.0121346	0.0762621	0.0596868	AGT/TGFB2/PTGS2/VIL1/EGF/GLIPR2/NRP2/FGF1/RAB25/TDGF1/ANXA1	11
BP	GO:0048771	tissue remodeling	11/541	174/18800	0.0121346	0.0762621	0.0596868	AGT/IGFBP5/DDR2/IL6/TNFAIP3/PTN/VDR/PLG/RASSF2/HRG/PTH1R	11
BP	GO:0032612	interleukin-1 production	9/541	129/18800	0.0123334	0.0771665	0.0603946	TMEM106A/CARD16/IL6/TNFAIP3/HAVCR2/IGF1/IFI16/CD36/ANXA1	9
BP	GO:0032652	regulation of interleukin-1 production	9/541	129/18800	0.0123334	0.0771665	0.0603946	TMEM106A/CARD16/IL6/TNFAIP3/HAVCR2/IGF1/IFI16/CD36/ANXA1	9
BP	GO:2000027	regulation of animal organ morphogenesis	9/541	129/18800	0.0123334	0.0771665	0.0603946	AGT/WNT2B/BMP7/SIX2/DAB2/WT1/FGF1/BMP2/SFRP2	9
BP	GO:0048167	regulation of synaptic plasticity	12/541	198/18800	0.012348	0.0771665	0.0603946	LRRTM1/AGT/PTGS2/PTN/CPEB3/KCNJ10/HRH1/NFATC4/SLC1A1/APOE/EGR2/MAPT	12
BP	GO:0016101	diterpenoid metabolic process	7/541	87/18800	0.0126798	0.0791285	0.0619301	ADH6/SRD5A1/RDH12/UGT1A1/ALDH1A2/RBP4/RARRES2	7
BP	GO:0007173	epidermal growth factor receptor signaling pathway	8/541	108/18800	0.0127695	0.0794757	0.0622019	AGT/VIL1/RASSF2/PLAUR/EGF/CCDC88A/KIF16B/AREG	8
BP	GO:0022408	negative regulation of cell-cell adhesion	12/541	199/18800	0.0128102	0.0794757	0.0622019	ADAMTS18/TNFRSF21/PLG/HAVCR2/KLF4/FGG/ABAT/CEBPB/BMP2/BCL6/ANXA1/PAG1	12
BP	GO:0001516	prostaglandin biosynthetic process	4/541	32/18800	0.0128788	0.0794757	0.0622019	PTGS2/PTGDS/ANXA1/FABP5	4
BP	GO:0003338	metanephros morphogenesis	4/541	32/18800	0.0128788	0.0794757	0.0622019	SIX2/SALL1/WT1/BASP1	4
BP	GO:0033028	myeloid cell apoptotic process	4/541	32/18800	0.0128788	0.0794757	0.0622019	SLC7A11/IL6/APOH/ANXA1	4
BP	GO:0045684	positive regulation of epidermis development	4/541	32/18800	0.0128788	0.0794757	0.0622019	VDR/ZBED2/SFRP4/CYP27B1	4
BP	GO:0046457	prostanoid biosynthetic process	4/541	32/18800	0.0128788	0.0794757	0.0622019	PTGS2/PTGDS/ANXA1/FABP5	4
BP	GO:0060795	cell fate commitment involved in formation of primary germ layer	4/541	32/18800	0.0128788	0.0794757	0.0622019	KLF4/SIX2/SOX17/SFRP2	4
BP	GO:0030168	platelet activation	9/541	130/18800	0.0129251	0.0796506	0.0623388	ADAMTS18/SLC7A11/IL6/VWF/FGG/ABAT/HRG/PRKCQ/APOE	9
BP	GO:0043270	positive regulation of ion transport	15/541	273/18800	0.0129923	0.0799541	0.0625763	AGT/SYT1/CAPN3/CYP4A11/KCNJ2/SLC34A1/ABAT/ACE2/KCNE1/CEBPB/WNK4/PRSS8/CYP4F2/CCL2/SLC9A3R1	15
BP	GO:0010862	positive regulation of pathway-restricted SMAD protein phosphorylation	5/541	49/18800	0.0130349	0.0801049	0.0626944	TGFB2/BMP7/DAB2/BMP2/INHBB	5
BP	GO:0044409	entry into host	10/541	153/18800	0.013208	0.0810564	0.063439	CLDN1/TRIM6/ICAM1/TMPRSS2/CXCL8/CH25H/LDLR/ANPEP/ACE2/GSN	10
BP	GO:0006639	acylglycerol metabolic process	9/541	131/18800	0.0135375	0.0829641	0.0649321	ACSL1/GK/PCK2/MTTP/LDLR/PNPLA3/APOH/APOE/SLC22A4	9
BP	GO:0006006	glucose metabolic process	12/541	201/18800	0.0137741	0.0842974	0.0659756	DCXR/PCK2/FBP1/KHK/PC/IGF1/GPD1/SORD/TFAP2B/PFKFB2/RBP4/FABP5	12
BP	GO:0052372	modulation by symbiont of entry into host	5/541	50/18800	0.0141501	0.0864791	0.0676831	TRIM6/TMPRSS2/CXCL8/CH25H/GSN	5
BP	GO:0006638	neutral lipid metabolic process	9/541	132/18800	0.0141712	0.0864893	0.0676912	ACSL1/GK/PCK2/MTTP/LDLR/PNPLA3/APOH/APOE/SLC22A4	9
BP	GO:0048799	animal organ maturation	4/541	33/18800	0.0143296	0.0870447	0.0681258	IGF1/BMP2/ALDH1A2/FGFR3	4
BP	GO:2000191	regulation of fatty acid transport	4/541	33/18800	0.0143296	0.0870447	0.0681258	FABP3/ACSL1/CYP4A11/CYP4F2	4
BP	GO:0032370	positive regulation of lipid transport	6/541	69/18800	0.0143416	0.0870447	0.0681258	FABP3/ACSL1/CYP4A11/DAB2/CYP4F2/APOE	6
BP	GO:0070527	platelet aggregation	6/541	69/18800	0.0143416	0.0870447	0.0681258	ADAMTS18/SLC7A11/IL6/FGG/ABAT/PRKCQ	6
BP	GO:1905952	regulation of lipid localization	10/541	155/18800	0.0143603	0.0870447	0.0681258	FABP3/ACSL1/AGT/IL6/ABCG1/CYP4A11/DAB2/CYP4F2/APOE/CD36	10
BP	GO:0042475	odontogenesis of dentin-containing tooth	7/541	90/18800	0.0150743	0.0912477	0.0714153	BMP7/SLC34A1/KLK5/ENAM/SOSTDC1/BMP2/WDR72	7
BP	GO:0043281	regulation of cysteine-type endopeptidase activity involved in apoptotic process	12/541	204/18800	0.0153224	0.0925285	0.0724177	CARD16/PTGS2/VIL1/PLAUR/KLF4/FABP1/GSN/SLC1A1/DPEP1/MAPT/SFRP2/AQP1	12
BP	GO:0045778	positive regulation of ossification	5/541	51/18800	0.0153276	0.0925285	0.0724177	TGFB2/BMP7/PTN/NELL1/BMP2	5
BP	GO:0043467	regulation of generation of precursor metabolites and energy	9/541	134/18800	0.015504	0.0934667	0.073152	PRKAA2/PRDM16/FBP1/AK4/SLC4A4/KHK/ENTPD5/IGF1/GPD1	9
BP	GO:0031128	developmental induction	4/541	34/18800	0.0158798	0.0954724	0.0747217	WNT2B/SALL1/FGF1/BMP2	4
BP	GO:0048730	epidermis morphogenesis	4/541	34/18800	0.0158798	0.0954724	0.0747217	IGFBP5/TGFB2/KLF4/SOSTDC1	4
BP	GO:0030879	mammary gland development	9/541	135/18800	0.016204	0.0970306	0.0759413	IGFBP5/VDR/EGF/NRG1/PRLR/AREG/CEBPB/SOSTDC1/TDGF1	9
BP	GO:0009223	pyrimidine deoxyribonucleotide catabolic process	3/541	19/18800	0.016292	0.0970306	0.0759413	UPP2/UPB1/DPYS	3
BP	GO:0019373	epoxygenase P450 pathway	3/541	19/18800	0.016292	0.0970306	0.0759413	CYP4A11/CYP4F2/CYP2B6	3
BP	GO:0045618	positive regulation of keratinocyte differentiation	3/541	19/18800	0.016292	0.0970306	0.0759413	VDR/ZBED2/CYP27B1	3
BP	GO:0060039	pericardium development	3/541	19/18800	0.016292	0.0970306	0.0759413	BMP7/WT1/BMP2	3
BP	GO:0060749	mammary gland alveolus development	3/541	19/18800	0.016292	0.0970306	0.0759413	EGF/PRLR/AREG	3
BP	GO:0061377	mammary gland lobule development	3/541	19/18800	0.016292	0.0970306	0.0759413	EGF/PRLR/AREG	3
BP	GO:2000379	positive regulation of reactive oxygen species metabolic process	6/541	71/18800	0.0163372	0.0971692	0.0760498	AGT/DCXR/ACE2/CD36/MAPT/H19	6
BP	GO:0044344	cellular response to fibroblast growth factor stimulus	8/541	113/18800	0.0164148	0.0975001	0.0763087	FLRT2/CXCL8/KIF16B/EGR3/FGF1/TDGF1/FGFR3/CCL2	8
BP	GO:0007219	Notch signaling pathway	11/541	182/18800	0.0164911	0.0975615	0.0763568	TGFB2/GOT1/BMP7/NEURL1B/DNER/TSPAN5/BMP2/KRT19/ZNF423/BCL6/BEND6	11
BP	GO:0032640	tumor necrosis factor production	11/541	182/18800	0.0164911	0.0975615	0.0763568	TMEM106A/IL6/TNFAIP3/HAVCR2/IGF1/IL33/PIK3R1/CLU/NFATC4/CD36/AKAP12	11
BP	GO:0032680	regulation of tumor necrosis factor production	11/541	182/18800	0.0164911	0.0975615	0.0763568	TMEM106A/IL6/TNFAIP3/HAVCR2/IGF1/IL33/PIK3R1/CLU/NFATC4/CD36/AKAP12	11
BP	GO:0006636	unsaturated fatty acid biosynthetic process	5/541	52/18800	0.0165688	0.0978903	0.0766141	PTGS2/SCD5/PTGDS/ANXA1/FABP5	5
BP	GO:0006109	regulation of carbohydrate metabolic process	11/541	183/18800	0.0171086	0.100945	0.079005	PRKAA2/FBP1/SLC4A4/EGF/KHK/ENTPD5/IGF1/GPD1/HRH1/PTH1R/PFKFB2	11
BP	GO:2000146	negative regulation of cell motility	18/541	361/18800	0.0173941	0.102413	0.0801537	IGFBP5/MMP28/CLDN5/KLF4/NRG1/MARVELD3/HAS1/DCN/HRG/ANGPT2/NAV3/IGFBP3/APOH/APOE/DPEP1/SFRP2/CCL2/SLC9A3R1	18
BP	GO:0006801	superoxide metabolic process	6/541	72/18800	0.0174035	0.102413	0.0801537	AGT/BMP7/SLC1A1/CD36/MAPT/H19	6
BP	GO:0000038	very long-chain fatty acid metabolic process	4/541	35/18800	0.0175314	0.102486	0.0802108	ACSL1/ACOT4/CYP4F2/SLC27A2	4
BP	GO:0007616	long-term memory	4/541	35/18800	0.0175314	0.102486	0.0802108	CPEB3/LDLR/NFATC4/APOE	4
BP	GO:0010762	regulation of fibroblast migration	4/541	35/18800	0.0175314	0.102486	0.0802108	PAK3/DDR2/HAS1/AKAP12	4
BP	GO:0044060	regulation of endocrine process	4/541	35/18800	0.0175314	0.102486	0.0802108	AGT/DAB2/CRHBP/INHBB	4
BP	GO:1901658	glycosyl compound catabolic process	4/541	35/18800	0.0175314	0.102486	0.0802108	UPP2/UPB1/GBA3/GDA	4
BP	GO:0009267	cellular response to starvation	10/541	160/18800	0.0175686	0.102568	0.0802753	PRKAA2/WNT2B/SLC39A4/SLC39A5/SRD5A1/IFI16/ALB/DAPL1/INHBB/AOC1	10
BP	GO:0071385	cellular response to glucocorticoid stimulus	5/541	53/18800	0.0178749	0.10422	0.0815678	PCK2/SRD5A1/UGT1A1/ANXA1/AQP1	5
BP	GO:0048880	sensory system development	19/541	389/18800	0.0179988	0.104804	0.0820252	ADAMTS18/ANGPTL7/WNT2B/TGFB2/SLC7A11/BMP7/SLC39A5/CHRDL1/KLF4/WT1/TFAP2B/CRYAA/SLC1A1/TENM3/ALDH1A2/USH1C/RBP4/COL8A1/SLC44A4	19
BP	GO:0050807	regulation of synapse organization	12/541	209/18800	0.0181914	0.105787	0.0827945	LRRTM1/PAK3/SLC7A11/ABHD17C/FLRT2/LRFN5/NRP2/TPBG/NFATC4/APOE/PTPRO/FARP1	12
BP	GO:0048738	cardiac muscle tissue development	13/541	234/18800	0.018331	0.106459	0.0833205	AGT/TGFB2/BMP7/PIM1/TNNT2/NRG1/IGF1/WT1/BMP2/ALDH1A2/RBP4/COL11A1/SGCG	13
BP	GO:1905954	positive regulation of lipid localization	7/541	94/18800	0.0187453	0.107574	0.0841928	FABP3/ACSL1/CYP4A11/DAB2/CYP4F2/APOE/CD36	7
BP	GO:0006525	arginine metabolic process	3/541	20/18800	0.0187654	0.107574	0.0841928	ASL/SLC7A7/AGMAT	3
BP	GO:0006700	C21-steroid hormone biosynthetic process	3/541	20/18800	0.0187654	0.107574	0.0841928	DAB2/BMP2/DKK3	3
BP	GO:0042053	regulation of dopamine metabolic process	3/541	20/18800	0.0187654	0.107574	0.0841928	GPR37/NR4A2/ABAT	3
BP	GO:0042069	regulation of catecholamine metabolic process	3/541	20/18800	0.0187654	0.107574	0.0841928	GPR37/NR4A2/ABAT	3
BP	GO:0042953	lipoprotein transport	3/541	20/18800	0.0187654	0.107574	0.0841928	MTTP/CUBN/CD36	3
BP	GO:0070314	G1 to G0 transition	3/541	20/18800	0.0187654	0.107574	0.0841928	CAPN3/SLC39A5/CYP27B1	3
BP	GO:1900424	regulation of defense response to bacterium	3/541	20/18800	0.0187654	0.107574	0.0841928	KLK7/HAVCR2/KLK5	3
BP	GO:1990961	xenobiotic detoxification by transmembrane export across the plasma membrane	3/541	20/18800	0.0187654	0.107574	0.0841928	SLC22A18/SLC47A1/SLC15A2	3
BP	GO:2000738	positive regulation of stem cell differentiation	3/541	20/18800	0.0187654	0.107574	0.0841928	MTCH2/TGFB2/PTN	3
BP	GO:0045661	regulation of myoblast differentiation	5/541	54/18800	0.0192474	0.109708	0.0858635	CAPN3/IGFBP3/SOSTDC1/CDON/BOC	5
BP	GO:0086002	cardiac muscle cell action potential involved in contraction	5/541	54/18800	0.0192474	0.109708	0.0858635	KCNJ3/KCNJ2/SCN2B/KCNE1/NEDD4L	5
BP	GO:1903829	positive regulation of protein localization	21/541	446/18800	0.0192639	0.109708	0.0858635	PRKAA2/MPC2/RAB29/TGFB2/PTGS2/TM7SF3/VIL1/ABCG1/ABHD17C/PCK2/MYRIP/PECAM1/EGF/FGG/CCDC88A/IGF1/ABAT/PIK3R1/PFKFB2/RBP4/MAPT	21
BP	GO:0019934	cGMP-mediated signaling	4/541	36/18800	0.0192861	0.109708	0.0858635	APOE/CD36/PDE10A/AQP1	4
BP	GO:0032350	regulation of hormone metabolic process	4/541	36/18800	0.0192861	0.109708	0.0858635	DAB2/CYP27B1/BMP2/DKK3	4
BP	GO:0071402	cellular response to lipoprotein particle stimulus	4/541	36/18800	0.0192861	0.109708	0.0858635	ABCG1/LDLR/APOE/CD36	4
BP	GO:0050808	synapse organization	20/541	419/18800	0.0193412	0.109881	0.0859984	LRRTM1/RAB29/PAK3/ADD2/SLC7A11/ABHD17C/FLRT2/LRFN5/DNER/NRG1/CNKSR2/NRP2/TPBG/NFATC4/SLC1A1/GABRB3/APOE/PTPRO/MAPT/FARP1	20
BP	GO:0009880	embryonic pattern specification	6/541	74/18800	0.0196774	0.111536	0.0872938	SATB2/BMP7/WT1/BASP1/NRP2/TDGF1	6
BP	GO:0051098	regulation of binding	18/541	366/18800	0.0196828	0.111536	0.0872938	CARD16/ADD2/TRIM6/CLDN5/PLAUR/KLF4/EGF/PLCL1/DAB2/IGF1/S100A10/ZBTB7C/IFI16/NFATC4/SLPI/BMP2/APOE/PON1	18
BP	GO:0071706	tumor necrosis factor superfamily cytokine production	11/541	187/18800	0.019752	0.111643	0.0873776	TMEM106A/IL6/TNFAIP3/HAVCR2/IGF1/IL33/PIK3R1/CLU/NFATC4/CD36/AKAP12	11
BP	GO:1903555	regulation of tumor necrosis factor superfamily cytokine production	11/541	187/18800	0.019752	0.111643	0.0873776	TMEM106A/IL6/TNFAIP3/HAVCR2/IGF1/IL33/PIK3R1/CLU/NFATC4/CD36/AKAP12	11
BP	GO:0034341	response to interferon-gamma	9/541	140/18800	0.0200548	0.11321	0.0886042	CLDN1/GSN/GBP2/CCL14/CYP27B1/CCL15/KYNU/TDGF1/CCL2	9
BP	GO:0048568	embryonic organ development	21/541	449/18800	0.0205685	0.115962	0.0907582	SATB2/TGFB2/BMP7/SOCS3/CXCL8/PLG/MMP16/SIX2/MYO6/SALL1/SOX17/CEBPB/JUNB/ALDH1A2/USH1C/RBP4/KRT19/COL11A1/RARRES2/SLC9A3R1/SLC44A4	21
BP	GO:0046164	alcohol catabolic process	5/541	55/18800	0.0206872	0.116484	0.0911662	GK/IMPA2/MIOX/SORD/APOE	5
BP	GO:1904019	epithelial cell apoptotic process	8/541	118/18800	0.0207572	0.116572	0.0912352	ICAM1/IL6/TNFAIP3/FGG/SFRP4/GSN/CCL2/H19	8
BP	GO:0034764	positive regulation of transmembrane transport	12/541	213/18800	0.0207626	0.116572	0.0912352	ACSL1/AGT/CAPN3/KCNJ2/SLC34A1/IGF1/ACE2/PIK3R1/KCNE1/WNK4/CCL2/SLC9A3R1	12
BP	GO:0060419	heart growth	7/541	96/18800	0.0207977	0.116572	0.0912352	AGT/TGFB2/PIM1/IGF1/WT1/BASP1/RBP4	7
BP	GO:0006809	nitric oxide biosynthetic process	6/541	75/18800	0.0208868	0.116572	0.0912352	AGT/PTGS2/KLF4/CLU/AGXT2/CD36	6
BP	GO:0045685	regulation of glial cell differentiation	6/541	75/18800	0.0208868	0.116572	0.0912352	IL6/PTN/TNFRSF21/LDLR/BMP2/EGR2	6
BP	GO:0086003	cardiac muscle cell contraction	6/541	75/18800	0.0208868	0.116572	0.0912352	KCNJ3/KCNJ2/SCN2B/GSN/KCNE1/NEDD4L	6
BP	GO:0120192	tight junction assembly	6/541	75/18800	0.0208868	0.116572	0.0912352	CLDN1/CLDN5/PECAM1/MARVELD3/CLDN10/ILDR1	6
BP	GO:0072529	pyrimidine-containing compound catabolic process	4/541	37/18800	0.0211456	0.117868	0.0922498	ALDH6A1/UPP2/UPB1/DPYS	4
BP	GO:0040013	negative regulation of locomotion	19/541	396/18800	0.0212176	0.118121	0.0924476	IGFBP5/MMP28/CLDN5/KLF4/NRG1/MARVELD3/HAS1/DCN/HRG/ANGPT2/NAV3/IGFBP3/APOH/APOE/DPEP1/PTPRO/SFRP2/CCL2/SLC9A3R1	19
BP	GO:0006244	pyrimidine nucleotide catabolic process	3/541	21/18800	0.0214348	0.118144	0.092466	UPP2/UPB1/DPYS	3
BP	GO:0009070	serine family amino acid biosynthetic process	3/541	21/18800	0.0214348	0.118144	0.092466	GGT1/PSAT1/AGXT2	3
BP	GO:0010766	negative regulation of sodium ion transport	3/541	21/18800	0.0214348	0.118144	0.092466	WNK4/NEDD4L/SLC9A3R1	3
BP	GO:0019370	leukotriene biosynthetic process	3/541	21/18800	0.0214348	0.118144	0.092466	GGT6/GGT1/GGTLC1	3
BP	GO:0044872	lipoprotein localization	3/541	21/18800	0.0214348	0.118144	0.092466	MTTP/CUBN/CD36	3
BP	GO:0071498	cellular response to fluid shear stress	3/541	21/18800	0.0214348	0.118144	0.092466	PTGS2/KLF4/TFPI2	3
BP	GO:0072111	cell proliferation involved in kidney development	3/541	21/18800	0.0214348	0.118144	0.092466	BMP7/WT1/BMP2	3
BP	GO:0090189	regulation of branching involved in ureteric bud morphogenesis	3/541	21/18800	0.0214348	0.118144	0.092466	AGT/WNT2B/SIX2	3
BP	GO:0071774	response to fibroblast growth factor	8/541	119/18800	0.0217148	0.119526	0.0935477	FLRT2/CXCL8/KIF16B/EGR3/FGF1/TDGF1/FGFR3/CCL2	8
BP	GO:0019058	viral life cycle	16/541	317/18800	0.0217401	0.119526	0.0935477	RAB29/CLDN1/TRIM6/ICAM1/TMPRSS2/CXCL8/PC/CH25H/LDLR/ANPEP/ACE2/GSN/IFI16/SLPI/APOE/CCL2	16
BP	GO:0032147	activation of protein kinase activity	9/541	142/18800	0.0217664	0.119526	0.0935477	AGT/TGFB2/EGF/NRG1/CCDC88A/IGF1/PRLR/SLC1A1/FGF1	9
BP	GO:0022409	positive regulation of cell-cell adhesion	15/541	291/18800	0.0218276	0.119567	0.0935792	TNFSF13B/IL6/BMP7/PLAUR/HAVCR2/FGG/NFKBIZ/MAP3K8/IGF1/HLA-DQB1/EGR3/PRKCQ/BCL6/ANXA1/CCL2	15
BP	GO:0042063	gliogenesis	15/541	291/18800	0.0218276	0.119567	0.0935792	TGFB2/IL6/PTN/TNFRSF21/DNER/NRG1/LDLR/KCNJ10/AREG/CLU/BMP2/ANXA1/EGR2/MAPT/CCL2	15
BP	GO:0045807	positive regulation of endocytosis	7/541	97/18800	0.0218804	0.119708	0.0936901	EGF/DAB2/SFRP4/CLU/APOE/CD36/NEDD4L	7
BP	GO:0050803	regulation of synapse structure or activity	12/541	215/18800	0.0221451	0.120985	0.0946891	LRRTM1/PAK3/SLC7A11/ABHD17C/FLRT2/LRFN5/NRP2/TPBG/NFATC4/APOE/PTPRO/FARP1	12
BP	GO:0043903	regulation of biological process involved in symbiotic interaction	5/541	56/18800	0.0221955	0.120985	0.0946891	TRIM6/TMPRSS2/CXCL8/CH25H/GSN	5
BP	GO:0048016	inositol phosphate-mediated signaling	5/541	56/18800	0.0221955	0.120985	0.0946891	NRG1/IGF1/HRH1/NFATC4/MYOZ2	5
BP	GO:0050821	protein stabilization	11/541	191/18800	0.0226859	0.123355	0.0965438	PIM1/RASSF2/IGF1/AFM/SOX17/PIK3R1/CRYAA/A1CF/CLU/USP2/GBA3	11
BP	GO:0051701	biological process involved in interaction with host	11/541	191/18800	0.0226859	0.123355	0.0965438	CLDN1/TRIM6/ICAM1/TMPRSS2/CXCL8/PC/CH25H/LDLR/ANPEP/ACE2/GSN	11
BP	GO:0006721	terpenoid metabolic process	7/541	98/18800	0.0230015	0.124918	0.0977673	ADH6/SRD5A1/RDH12/UGT1A1/ALDH1A2/RBP4/RARRES2	7
BP	GO:0060416	response to growth hormone	4/541	38/18800	0.0231112	0.125054	0.097874	IGFBP5/SRD5A1/SLC34A1/PIK3R1	4
BP	GO:0072524	pyridine-containing compound metabolic process	4/541	38/18800	0.0231112	0.125054	0.097874	NAMPT/PSAT1/KYNU/ACMSD	4
BP	GO:1901661	quinone metabolic process	4/541	38/18800	0.0231112	0.125054	0.097874	NQO2/PDSS1/CYP4F3/CYP4F2	4
BP	GO:0018108	peptidyl-tyrosine phosphorylation	18/541	373/18800	0.0232683	0.125751	0.0984195	AGT/DDR2/FRK/IL6/GFRA1/SOCS3/PECAM1/EGF/NRG1/IGF1/PRLR/HRG/AREG/TDGF1/FGFR3/CD36/TSLP/SFRP2	18
BP	GO:0071222	cellular response to lipopolysaccharide	12/541	217/18800	0.0235945	0.127359	0.0996777	CARD16/CXCL1/CXCL2/IL6/TNFAIP3/CXCL8/HAVCR2/CXCL3/CEBPB/CD36/CCL2/DEFA1	12
BP	GO:0043388	positive regulation of DNA binding	5/541	57/18800	0.0237735	0.128169	0.100312	TRIM6/PLAUR/KLF4/EGF/IGF1	5
BP	GO:0001919	regulation of receptor recycling	3/541	22/18800	0.0243007	0.129283	0.101184	RAB29/LDLR/KIF16B	3
BP	GO:0006925	inflammatory cell apoptotic process	3/541	22/18800	0.0243007	0.129283	0.101184	SLC7A11/IL6/ANXA1	3
BP	GO:0007351	tripartite regional subdivision	3/541	22/18800	0.0243007	0.129283	0.101184	WT1/BASP1/TDGF1	3
BP	GO:0008595	anterior/posterior axis specification, embryo	3/541	22/18800	0.0243007	0.129283	0.101184	WT1/BASP1/TDGF1	3
BP	GO:0009129	pyrimidine nucleoside monophosphate metabolic process	3/541	22/18800	0.0243007	0.129283	0.101184	UPP2/UPB1/DPYS	3
BP	GO:0010226	response to lithium ion	3/541	22/18800	0.0243007	0.129283	0.101184	PTGS2/FABP4/NFATC4	3
BP	GO:0034104	negative regulation of tissue remodeling	3/541	22/18800	0.0243007	0.129283	0.101184	AGT/IL6/TNFAIP3	3
BP	GO:0061318	renal filtration cell differentiation	3/541	22/18800	0.0243007	0.129283	0.101184	WT1/BASP1/PTPRO	3
BP	GO:0071305	cellular response to vitamin D	3/541	22/18800	0.0243007	0.129283	0.101184	PIM1/VDR/CYP27B1	3
BP	GO:0072112	podocyte differentiation	3/541	22/18800	0.0243007	0.129283	0.101184	WT1/BASP1/PTPRO	3
BP	GO:0090335	regulation of brown fat cell differentiation	3/541	22/18800	0.0243007	0.129283	0.101184	PTGS2/BMP7/PIM1	3
BP	GO:0007612	learning	9/541	145/18800	0.0245266	0.130329	0.102002	AGT/PTGS2/SLC7A11/PTN/CLDN5/HRH1/TPBG/SLC1A1/NPTX2	9
BP	GO:1901136	carbohydrate derivative catabolic process	10/541	169/18800	0.0246307	0.130725	0.102312	ACOT7/NPL/ACAT1/UPP2/UPB1/GPD1/DPYS/PDE10A/GBA3/GDA	10
BP	GO:0099177	regulation of trans-synaptic signaling	20/541	430/18800	0.0246666	0.130759	0.102339	LRRTM1/AGT/PTGS2/SLC7A11/MCTP2/SYT1/PTN/CPEB3/PLCL1/KCNJ10/HRH1/NFATC4/SLC1A1/APOE/EGR2/NPTX2/MAPT/CCL2/AKAP12/FABP5	20
BP	GO:0010811	positive regulation of cell-substrate adhesion	8/541	122/18800	0.0247743	0.130989	0.102519	COL26A1/FGG/CCDC80/DAB2/S100A10/HRG/CD36/COL8A1	8
BP	GO:0048593	camera-type eye morphogenesis	8/541	122/18800	0.0247743	0.130989	0.102519	WNT2B/BMP7/TFAP2B/SLC1A1/TENM3/USH1C/RBP4/COL8A1	8
BP	GO:0042593	glucose homeostasis	13/541	244/18800	0.024828	0.130989	0.102519	PRKAA2/MPC2/IGFBP5/ICAM1/IL6/PCK2/TFAP2B/PIK3R1/RBP4/SUCNR1/ACSM2A/HNF4A/FABP5	13
BP	GO:0048762	mesenchymal cell differentiation	13/541	244/18800	0.024828	0.130989	0.102519	FAM83D/TGFB2/IL6/BMP7/SIX2/NRG1/OLFM1/DAB2/GLIPR2/NRP2/BMP2/ALDH1A2/SFRP2	13
BP	GO:0018212	peptidyl-tyrosine modification	18/541	376/18800	0.024949	0.131471	0.102896	AGT/DDR2/FRK/IL6/GFRA1/SOCS3/PECAM1/EGF/NRG1/IGF1/PRLR/HRG/AREG/TDGF1/FGFR3/CD36/TSLP/SFRP2	18
BP	GO:0006882	cellular zinc ion homeostasis	4/541	39/18800	0.0251842	0.131927	0.103253	SLC39A4/SLC39A5/SLC30A9/SLC1A1	4
BP	GO:0086091	regulation of heart rate by cardiac conduction	4/541	39/18800	0.0251842	0.131927	0.103253	KCNJ3/KCNJ2/SCN2B/KCNE1	4
BP	GO:0097242	amyloid-beta clearance	4/541	39/18800	0.0251842	0.131927	0.103253	LDLR/CLU/APOE/CD36	4
BP	GO:1901031	regulation of response to reactive oxygen species	4/541	39/18800	0.0251842	0.131927	0.103253	GPR37/BMP7/CD36/H19	4
BP	GO:1901998	toxin transport	4/541	39/18800	0.0251842	0.131927	0.103253	RAB29/ABCG1/SLC7A8/ANTXR1	4
BP	GO:0006695	cholesterol biosynthetic process	5/541	58/18800	0.025422	0.132547	0.103738	PRKAA2/ABCG1/ACAA2/FGF1/APOE	5
BP	GO:0045604	regulation of epidermal cell differentiation	5/541	58/18800	0.025422	0.132547	0.103738	VDR/ZBED2/SFRP4/CYP27B1/MAFF	5
BP	GO:0061005	cell differentiation involved in kidney development	5/541	58/18800	0.025422	0.132547	0.103738	SIX2/SALL1/WT1/BASP1/PTPRO	5
BP	GO:1902653	secondary alcohol biosynthetic process	5/541	58/18800	0.025422	0.132547	0.103738	PRKAA2/ABCG1/ACAA2/FGF1/APOE	5
BP	GO:0046718	viral entry into host cell	9/541	146/18800	0.0254997	0.132796	0.103933	CLDN1/TRIM6/ICAM1/TMPRSS2/CH25H/LDLR/ANPEP/ACE2/GSN	9
BP	GO:0033500	carbohydrate homeostasis	13/541	245/18800	0.0255606	0.132957	0.104059	PRKAA2/MPC2/IGFBP5/ICAM1/IL6/PCK2/TFAP2B/PIK3R1/RBP4/SUCNR1/ACSM2A/HNF4A/FABP5	13
BP	GO:0001704	formation of primary germ layer	8/541	123/18800	0.0258579	0.134346	0.105146	BMP7/KLF4/SIX2/SOX17/KIF16B/COL11A1/SFRP2/COL8A1	8
BP	GO:0060537	muscle tissue development	19/541	405/18800	0.0259858	0.134853	0.105543	AGT/IGFBP5/TGFB2/BMP7/PIM1/TNNT2/DNER/NRG1/IGF1/WT1/TFAP2B/MAFF/BMP2/ALDH1A2/RBP4/EGR2/COL11A1/MYOZ2/SGCG	19
BP	GO:0032535	regulation of cellular component size	17/541	351/18800	0.0261212	0.135397	0.105969	CYFIP2/PAK3/ADD2/VIL1/CDHR5/SLC12A6/PPP1R15A/SLC12A3/OLFM1/GSN/AQP11/USH1C/APOE/MAPT/CDC42EP5/AQP1/SLC9A3R1	17
BP	GO:0030301	cholesterol transport	6/541	79/18800	0.0262255	0.135621	0.106144	ABCG1/APOM/LDLR/CLU/APOE/CD36	6
BP	GO:0034637	cellular carbohydrate biosynthetic process	6/541	79/18800	0.0262255	0.135621	0.106144	GOT1/PCK2/IMPA2/FBP1/IGF1/HAS1	6
BP	GO:0000041	transition metal ion transport	7/541	101/18800	0.0266012	0.137244	0.107414	SLC25A37/SLC39A4/SLC39A5/HRG/SLC30A9/SLC1A1/SCARA5	7
BP	GO:0032963	collagen metabolic process	7/541	101/18800	0.0266012	0.137244	0.107414	IL6/MMP28/PEPD/KLK6/MMP16/ADAMTS3/MFAP4	7
BP	GO:0001654	eye development	18/541	379/18800	0.0267201	0.137697	0.107769	ADAMTS18/ANGPTL7/WNT2B/TGFB2/SLC7A11/BMP7/SLC39A5/CHRDL1/KLF4/WT1/TFAP2B/CRYAA/SLC1A1/TENM3/ALDH1A2/USH1C/RBP4/COL8A1	18
BP	GO:0009161	ribonucleoside monophosphate metabolic process	5/541	59/18800	0.0271419	0.138768	0.108607	UPP2/AK4/UPB1/DPYS/GDA	5
BP	GO:0050891	multicellular organismal water homeostasis	5/541	59/18800	0.0271419	0.138768	0.108607	CLDN1/CYP4A11/TFAP2B/CYP4F2/AQP1	5
BP	GO:0071384	cellular response to corticosteroid stimulus	5/541	59/18800	0.0271419	0.138768	0.108607	PCK2/SRD5A1/UGT1A1/ANXA1/AQP1	5
BP	GO:1902893	regulation of miRNA transcription	5/541	59/18800	0.0271419	0.138768	0.108607	TGFB2/KLF4/WT1/NFATC4/BMP2	5
BP	GO:0006833	water transport	3/541	23/18800	0.0273628	0.138768	0.108607	SLC4A11/AQP11/AQP1	3
BP	GO:0010893	positive regulation of steroid biosynthetic process	3/541	23/18800	0.0273628	0.138768	0.108607	ABCG1/DAB2/FGF1	3
BP	GO:0019430	removal of superoxide radicals	3/541	23/18800	0.0273628	0.138768	0.108607	BMP7/CD36/H19	3
BP	GO:0045540	regulation of cholesterol biosynthetic process	3/541	23/18800	0.0273628	0.138768	0.108607	ABCG1/FGF1/APOE	3
BP	GO:0045663	positive regulation of myoblast differentiation	3/541	23/18800	0.0273628	0.138768	0.108607	IGFBP3/CDON/BOC	3
BP	GO:0051957	positive regulation of amino acid transport	3/541	23/18800	0.0273628	0.138768	0.108607	AGT/ABAT/ACE2	3
BP	GO:0060571	morphogenesis of an epithelial fold	3/541	23/18800	0.0273628	0.138768	0.108607	WNT2B/BMP7/SOSTDC1	3
BP	GO:0072311	glomerular epithelial cell differentiation	3/541	23/18800	0.0273628	0.138768	0.108607	WT1/BASP1/PTPRO	3
BP	GO:0106118	regulation of sterol biosynthetic process	3/541	23/18800	0.0273628	0.138768	0.108607	ABCG1/FGF1/APOE	3
BP	GO:0051954	positive regulation of amine transport	4/541	40/18800	0.0273657	0.138768	0.108607	AGT/SYT1/ABAT/ACE2	4
BP	GO:0031647	regulation of protein stability	15/541	300/18800	0.0276644	0.139928	0.109515	CAPN3/PIM1/RASSF2/IGF1/AFM/SOX17/PIK3R1/GSN/CRYAA/A1CF/CLU/BMP2/USP2/NEDD4L/GBA3	15
BP	GO:0003151	outflow tract morphogenesis	6/541	80/18800	0.0276892	0.139928	0.109515	TGFB2/BMP7/CLDN5/SOX17/NRP2/SFRP2	6
BP	GO:0008306	associative learning	6/541	80/18800	0.0276892	0.139928	0.109515	AGT/SLC7A11/HRH1/TPBG/SLC1A1/NPTX2	6
BP	GO:0014706	striated muscle tissue development	13/541	248/18800	0.0278539	0.140581	0.110026	AGT/TGFB2/BMP7/PIM1/TNNT2/NRG1/IGF1/WT1/BMP2/ALDH1A2/RBP4/COL11A1/SGCG	13
BP	GO:0062014	negative regulation of small molecule metabolic process	7/541	102/18800	0.0278817	0.140581	0.110026	FBP1/CYP27B1/BMP2/APOE/ACMSD/H19/DKK3	7
BP	GO:0050870	positive regulation of T cell activation	12/541	223/18800	0.0283614	0.142759	0.111731	TNFSF13B/IL6/HAVCR2/NFKBIZ/MAP3K8/IGF1/HLA-DQB1/EGR3/PRKCQ/BCL6/ANXA1/CCL2	12
BP	GO:0060485	mesenchyme development	15/541	301/18800	0.0283781	0.142759	0.111731	FAM83D/TGFB2/IL6/BMP7/SIX2/NRG1/OLFM1/DAB2/WT1/BASP1/GLIPR2/NRP2/BMP2/ALDH1A2/SFRP2	15
BP	GO:0033866	nucleoside bisphosphate biosynthetic process	5/541	60/18800	0.0289342	0.144573	0.113151	ACOT7/ACSL1/MPC2/PANK1/ACAT1	5
BP	GO:0034030	ribonucleoside bisphosphate biosynthetic process	5/541	60/18800	0.0289342	0.144573	0.113151	ACOT7/ACSL1/MPC2/PANK1/ACAT1	5
BP	GO:0034033	purine nucleoside bisphosphate biosynthetic process	5/541	60/18800	0.0289342	0.144573	0.113151	ACOT7/ACSL1/MPC2/PANK1/ACAT1	5
BP	GO:0043407	negative regulation of MAP kinase activity	5/541	60/18800	0.0289342	0.144573	0.113151	AGT/BMP7/BMP2/APOE/SFRP2	5
BP	GO:0055008	cardiac muscle tissue morphogenesis	5/541	60/18800	0.0289342	0.144573	0.113151	TGFB2/TNNT2/NRG1/BMP2/COL11A1	5
BP	GO:0061614	miRNA transcription	5/541	60/18800	0.0289342	0.144573	0.113151	TGFB2/KLF4/WT1/NFATC4/BMP2	5
BP	GO:0120193	tight junction organization	6/541	81/18800	0.0292058	0.145708	0.114039	CLDN1/CLDN5/PECAM1/MARVELD3/CLDN10/ILDR1	6
BP	GO:0150063	visual system development	18/541	383/18800	0.029227	0.145708	0.114039	ADAMTS18/ANGPTL7/WNT2B/TGFB2/SLC7A11/BMP7/SLC39A5/CHRDL1/KLF4/WT1/TFAP2B/CRYAA/SLC1A1/TENM3/ALDH1A2/USH1C/RBP4/COL8A1	18
BP	GO:0009154	purine ribonucleotide catabolic process	4/541	41/18800	0.0296566	0.147024	0.115069	ACOT7/ACAT1/PDE10A/GDA	4
BP	GO:0055069	zinc ion homeostasis	4/541	41/18800	0.0296566	0.147024	0.115069	SLC39A4/SLC39A5/SLC30A9/SLC1A1	4
BP	GO:0060421	positive regulation of heart growth	4/541	41/18800	0.0296566	0.147024	0.115069	PIM1/IGF1/WT1/BASP1	4
BP	GO:0071548	response to dexamethasone	4/541	41/18800	0.0296566	0.147024	0.115069	CLDN1/PCK2/SRD5A1/AQP1	4
BP	GO:1902742	apoptotic process involved in development	4/541	41/18800	0.0296566	0.147024	0.115069	SLIT3/TGFB2/BMP7/VDR	4
BP	GO:0019932	second-messenger-mediated signaling	15/541	303/18800	0.0298461	0.147798	0.115675	AGT/MCTP2/CXCL8/NRG1/IGF1/ACKR4/HRH1/NFATC4/ADCY2/APOE/CD36/PDE10A/MAPT/MYOZ2/AQP1	15
BP	GO:0050920	regulation of chemotaxis	12/541	225/18800	0.0300955	0.148867	0.116511	IL6/PTN/MMP28/CXCL8/HRG/ANGPT2/TPBG/FGF1/SUCNR1/PTPRO/CCL2/RARRES2	12
BP	GO:0035265	organ growth	10/541	175/18800	0.0303504	0.149959	0.117366	AGT/DDR2/TGFB2/PIM1/IGF1/PRLR/WT1/BASP1/FGFR3/RBP4	10
BP	GO:0001759	organ induction	3/541	24/18800	0.0306205	0.149959	0.117366	WNT2B/FGF1/BMP2	3
BP	GO:0003081	regulation of systemic arterial blood pressure by renin-angiotensin	3/541	24/18800	0.0306205	0.149959	0.117366	AGT/ACE2/SUCNR1	3
BP	GO:0006541	glutamine metabolic process	3/541	24/18800	0.0306205	0.149959	0.117366	GLS/GLYATL1/GFPT2	3
BP	GO:0048143	astrocyte activation	3/541	24/18800	0.0306205	0.149959	0.117366	IL6/LDLR/MAPT	3
BP	GO:0071577	zinc ion transmembrane transport	3/541	24/18800	0.0306205	0.149959	0.117366	SLC39A4/SLC39A5/SLC1A1	3
BP	GO:0120255	olefinic compound biosynthetic process	3/541	24/18800	0.0306205	0.149959	0.117366	DAB2/BMP2/DKK3	3
BP	GO:1903792	negative regulation of anion transport	3/541	24/18800	0.0306205	0.149959	0.117366	ABAT/SFRP4/CYP4F2	3
BP	GO:2000679	positive regulation of transcription regulatory region DNA binding	3/541	24/18800	0.0306205	0.149959	0.117366	TRIM6/KLF4/IGF1	3
BP	GO:0019319	hexose biosynthetic process	6/541	82/18800	0.0307761	0.150339	0.117663	PCK2/FBP1/PC/GPD1/SORD/RBP4	6
BP	GO:0042310	vasoconstriction	6/541	82/18800	0.0307761	0.150339	0.117663	AGT/PTGS2/FGG/HRH1/ACE2/KCNMB2	6
BP	GO:0043112	receptor metabolic process	5/541	61/18800	0.0307996	0.150339	0.117663	RAB29/NRG1/LDLR/KIF16B/APOE	5
BP	GO:0008406	gonad development	12/541	226/18800	0.0309907	0.151105	0.118263	WNT2B/SLIT3/TGFB2/GFRA1/SRD5A1/SALL1/WT1/BASP1/CEBPB/INHBB/SDC1/SFRP2	12
BP	GO:1901888	regulation of cell junction assembly	11/541	201/18800	0.0313981	0.151319	0.11843	LRRTM1/CLDN1/AGT/CLDN5/FLRT2/LRFN5/S100A10/HRG/ACE2/TPBG/FARP1	11
BP	GO:0042542	response to hydrogen peroxide	8/541	128/18800	0.0317731	0.151319	0.11843	GPR37/IL6/TNFAIP3/FABP1/AREG/SDC1/ANXA1/AQP1	8
BP	GO:0002291	T cell activation via T cell receptor contact with antigen bound to MHC molecule on antigen presenting cell	2/541	10/18800	0.0319173	0.151319	0.11843	ICAM1/HAVCR2	2
BP	GO:0003330	regulation of extracellular matrix constituent secretion	2/541	10/18800	0.0319173	0.151319	0.11843	AGT/BMP2	2
BP	GO:0006702	androgen biosynthetic process	2/541	10/18800	0.0319173	0.151319	0.11843	CYP17A1/SRD5A1	2
BP	GO:0015791	polyol transmembrane transport	2/541	10/18800	0.0319173	0.151319	0.11843	AQP11/AQP1	2
BP	GO:0015911	long-chain fatty acid import across plasma membrane	2/541	10/18800	0.0319173	0.151319	0.11843	ACSL1/CD36	2
BP	GO:0019062	virion attachment to host cell	2/541	10/18800	0.0319173	0.151319	0.11843	ICAM1/ACE2	2
BP	GO:0030388	fructose 1,6-bisphosphate metabolic process	2/541	10/18800	0.0319173	0.151319	0.11843	FBP1/ALDOB	2
BP	GO:0031943	regulation of glucocorticoid metabolic process	2/541	10/18800	0.0319173	0.151319	0.11843	BMP2/DKK3	2
BP	GO:0034651	cortisol biosynthetic process	2/541	10/18800	0.0319173	0.151319	0.11843	BMP2/DKK3	2
BP	GO:0035524	proline transmembrane transport	2/541	10/18800	0.0319173	0.151319	0.11843	SLC7A8/ACE2	2
BP	GO:0045542	positive regulation of cholesterol biosynthetic process	2/541	10/18800	0.0319173	0.151319	0.11843	ABCG1/FGF1	2
BP	GO:0071107	response to parathyroid hormone	2/541	10/18800	0.0319173	0.151319	0.11843	SLC34A1/SOST	2
BP	GO:0072070	loop of Henle development	2/541	10/18800	0.0319173	0.151319	0.11843	IRX2/IRX1	2
BP	GO:0072124	regulation of glomerular mesangial cell proliferation	2/541	10/18800	0.0319173	0.151319	0.11843	BMP7/WT1	2
BP	GO:0072203	cell proliferation involved in metanephros development	2/541	10/18800	0.0319173	0.151319	0.11843	BMP7/WT1	2
BP	GO:0097267	omega-hydroxylase P450 pathway	2/541	10/18800	0.0319173	0.151319	0.11843	CYP4A11/CYP4F2	2
BP	GO:0098917	retrograde trans-synaptic signaling	2/541	10/18800	0.0319173	0.151319	0.11843	FARP1/FABP5	2
BP	GO:0106120	positive regulation of sterol biosynthetic process	2/541	10/18800	0.0319173	0.151319	0.11843	ABCG1/FGF1	2
BP	GO:0140059	dendrite arborization	2/541	10/18800	0.0319173	0.151319	0.11843	PTN/TPBG	2
BP	GO:0150172	regulation of phosphatidylcholine metabolic process	2/541	10/18800	0.0319173	0.151319	0.11843	FABP3/LDLR	2
BP	GO:1902224	ketone body metabolic process	2/541	10/18800	0.0319173	0.151319	0.11843	TYRP1/ACAT1	2
BP	GO:1902645	tertiary alcohol biosynthetic process	2/541	10/18800	0.0319173	0.151319	0.11843	BMP2/DKK3	2
BP	GO:1901343	negative regulation of vasculature development	9/541	152/18800	0.0319176	0.151319	0.11843	ANGPTL7/AGT/TGFB2/CLDN5/KLF4/DCN/HRG/ANGPT2/APOH	9
BP	GO:0030510	regulation of BMP signaling pathway	7/541	105/18800	0.0319723	0.151319	0.11843	CHRDL1/SFRP4/TFAP2B/SOSTDC1/SOST/ZNF423/SFRP2	7
BP	GO:0045017	glycerolipid biosynthetic process	13/541	253/18800	0.0320054	0.151319	0.11843	FABP3/ACSL1/PLD1/SOCS3/GK/PCK2/IMPA2/LDLR/AGPAT3/PIK3R1/PNPLA3/FABP5/SLC44A4	13
BP	GO:0002347	response to tumor cell	4/541	42/18800	0.0320576	0.151319	0.11843	HAVCR2/KLF4/HRG/RBMS3	4
BP	GO:0030501	positive regulation of bone mineralization	4/541	42/18800	0.0320576	0.151319	0.11843	BMP7/PTN/NELL1/BMP2	4
BP	GO:0071354	cellular response to interleukin-6	4/541	42/18800	0.0320576	0.151319	0.11843	IL6/FGG/ST3GAL6/TDGF1	4
BP	GO:0043030	regulation of macrophage activation	5/541	62/18800	0.0327388	0.154042	0.120562	IL6/LRFN5/HAVCR2/LDLR/IL33	5
BP	GO:0060393	regulation of pathway-restricted SMAD protein phosphorylation	5/541	62/18800	0.0327388	0.154042	0.120562	TGFB2/BMP7/DAB2/BMP2/INHBB	5
BP	GO:2000736	regulation of stem cell differentiation	5/541	62/18800	0.0327388	0.154042	0.120562	MTCH2/TGFB2/TRIM6/PTN/SLC4A11	5
BP	GO:0007517	muscle organ development	16/541	334/18800	0.033018	0.155192	0.121461	TGFB2/CAPN3/TNNT2/DNER/NRG1/IGF1/WT1/BASP1/MAFF/EGR3/BMP2/USP2/EGR2/COL11A1/MYOZ2/SGCG	16
BP	GO:0071219	cellular response to molecule of bacterial origin	12/541	229/18800	0.0337908	0.158005	0.123663	CARD16/CXCL1/CXCL2/IL6/TNFAIP3/CXCL8/HAVCR2/CXCL3/CEBPB/CD36/CCL2/DEFA1	12
BP	GO:0006817	phosphate ion transport	3/541	25/18800	0.0340725	0.158005	0.123663	SLC34A1/SFRP4/CEBPB	3
BP	GO:0009164	nucleoside catabolic process	3/541	25/18800	0.0340725	0.158005	0.123663	UPP2/UPB1/GDA	3
BP	GO:0009219	pyrimidine deoxyribonucleotide metabolic process	3/541	25/18800	0.0340725	0.158005	0.123663	UPP2/UPB1/DPYS	3
BP	GO:0032753	positive regulation of interleukin-4 production	3/541	25/18800	0.0340725	0.158005	0.123663	HAVCR2/CEBPB/PRKCQ	3
BP	GO:0034114	regulation of heterotypic cell-cell adhesion	3/541	25/18800	0.0340725	0.158005	0.123663	BMP7/KLF4/FGG	3
BP	GO:0071450	cellular response to oxygen radical	3/541	25/18800	0.0340725	0.158005	0.123663	BMP7/CD36/H19	3
BP	GO:0071451	cellular response to superoxide	3/541	25/18800	0.0340725	0.158005	0.123663	BMP7/CD36/H19	3
BP	GO:0072273	metanephric nephron morphogenesis	3/541	25/18800	0.0340725	0.158005	0.123663	SIX2/SALL1/WT1	3
BP	GO:0086013	membrane repolarization during cardiac muscle cell action potential	3/541	25/18800	0.0340725	0.158005	0.123663	KCNJ3/KCNJ2/KCNE1	3
BP	GO:0097186	amelogenesis	3/541	25/18800	0.0340725	0.158005	0.123663	KLK5/ENAM/WDR72	3
BP	GO:1903959	regulation of anion transmembrane transport	3/541	25/18800	0.0340725	0.158005	0.123663	AGT/SLC34A1/ACE2	3
BP	GO:0001523	retinoid metabolic process	6/541	84/18800	0.0340796	0.158005	0.123663	ADH6/RDH12/UGT1A1/ALDH1A2/RBP4/RARRES2	6
BP	GO:0048565	digestive tract development	8/541	130/18800	0.0343786	0.159225	0.124618	TGFB2/CXCL8/SIX2/SALL1/SOX17/ALDH1A2/SFRP2/RARRES2	8
BP	GO:0006775	fat-soluble vitamin metabolic process	4/541	43/18800	0.0345692	0.159277	0.124659	CYP27B1/CYP4F3/CYP4F2/ALDH1A2	4
BP	GO:0009394	2'-deoxyribonucleotide metabolic process	4/541	43/18800	0.0345692	0.159277	0.124659	UPP2/UPB1/DPYS/GDA	4
BP	GO:0042181	ketone biosynthetic process	4/541	43/18800	0.0345692	0.159277	0.124659	PDSS1/DAB2/BMP2/DKK3	4
BP	GO:0045214	sarcomere organization	4/541	43/18800	0.0345692	0.159277	0.124659	CAPN3/TNNT2/KRT19/MYOZ2	4
BP	GO:0046596	regulation of viral entry into host cell	4/541	43/18800	0.0345692	0.159277	0.124659	TRIM6/TMPRSS2/CH25H/GSN	4
BP	GO:0045927	positive regulation of growth	13/541	256/18800	0.0347013	0.159343	0.12471	TGFB2/VIL1/SYT1/CAPN3/PIM1/IGF1/WT1/BASP1/IGFBP1/MAPT/SFRP2/NEDD4L/SLC44A4	13
BP	GO:0009311	oligosaccharide metabolic process	5/541	63/18800	0.0347524	0.159343	0.12471	FBP1/ST3GAL6/MGAM/GBA3/FUT6	5
BP	GO:0032623	interleukin-2 production	5/541	63/18800	0.0347524	0.159343	0.12471	TNFAIP3/HAVCR2/NAV3/PRKCQ/ANXA1	5
BP	GO:0032663	regulation of interleukin-2 production	5/541	63/18800	0.0347524	0.159343	0.12471	TNFAIP3/HAVCR2/NAV3/PRKCQ/ANXA1	5
BP	GO:0009913	epidermal cell differentiation	12/541	230/18800	0.0347631	0.159343	0.12471	VDR/KLF4/MYO6/ZBED2/KLK5/SFRP4/CYP27B1/MAFF/USH1C/ANXA1/SLC9A3R1/SLC44A4	12
BP	GO:0030004	cellular monovalent inorganic cation homeostasis	7/541	107/18800	0.0349115	0.159858	0.125113	AGT/KCNJ2/SLC4A4/ATP6V0D2/TFAP2B/AQP11/NEDD4L	7
BP	GO:0045216	cell-cell junction organization	11/541	205/18800	0.035474	0.162266	0.126998	CLDN1/AGT/TGFB2/CLDN5/PECAM1/MARVELD3/ACE2/CLDN10/UGT8/ILDR1/PTPRO	11
BP	GO:0033674	positive regulation of kinase activity	21/541	476/18800	0.035601	0.162679	0.127321	ACSL1/AGT/DDR2/TGFB2/RASSF2/EGF/CCND2/NRG1/CCDC88A/S100A12/IGF1/PRLR/AREG/CLU/SLC1A1/PFKFB2/FGF1/BMP2/TDGF1/FGFR3/MAPT	21
BP	GO:0045137	development of primary sexual characteristics	12/541	231/18800	0.0357551	0.163148	0.127688	WNT2B/SLIT3/TGFB2/GFRA1/SRD5A1/SALL1/WT1/BASP1/CEBPB/INHBB/SDC1/SFRP2	12
BP	GO:0007416	synapse assembly	10/541	180/18800	0.0357871	0.163148	0.127688	LRRTM1/RAB29/ADD2/FLRT2/LRFN5/DNER/NRG1/TPBG/GABRB3/FARP1	10
BP	GO:0050886	endocrine process	6/541	85/18800	0.0358139	0.163148	0.127688	AGT/DAB2/ACE2/CRHBP/INHBB/SUCNR1	6
BP	GO:0048247	lymphocyte chemotaxis	5/541	64/18800	0.036841	0.167333	0.130964	CH25H/CCL14/CCL15/CCL2/DEFA1	5
BP	GO:0048017	inositol lipid-mediated signaling	10/541	181/18800	0.0369506	0.167333	0.130964	AGT/PLD1/TGFB2/EGF/ENTPD5/PLCL1/IGF1/DCN/PIK3R1/SLC9A3R1	10
BP	GO:0009262	deoxyribonucleotide metabolic process	4/541	44/18800	0.0371919	0.167333	0.130964	UPP2/UPB1/DPYS/GDA	4
BP	GO:0033173	calcineurin-NFAT signaling cascade	4/541	44/18800	0.0371919	0.167333	0.130964	NRG1/IGF1/NFATC4/MYOZ2	4
BP	GO:0060443	mammary gland morphogenesis	4/541	44/18800	0.0371919	0.167333	0.130964	IGFBP5/VDR/AREG/SOSTDC1	4
BP	GO:0046364	monosaccharide biosynthetic process	6/541	86/18800	0.037604	0.167333	0.130964	PCK2/FBP1/PC/GPD1/SORD/RBP4	6
BP	GO:0009435	NAD biosynthetic process	3/541	26/18800	0.0377172	0.167333	0.130964	NAMPT/KYNU/ACMSD	3
BP	GO:0010954	positive regulation of protein processing	3/541	26/18800	0.0377172	0.167333	0.130964	S100A10/GSN/CLEC3B	3
BP	GO:0031664	regulation of lipopolysaccharide-mediated signaling pathway	3/541	26/18800	0.0377172	0.167333	0.130964	CARD16/TNFAIP3/CD36	3
BP	GO:0034377	plasma lipoprotein particle assembly	3/541	26/18800	0.0377172	0.167333	0.130964	MTTP/APOM/APOE	3
BP	GO:0051016	barbed-end actin filament capping	3/541	26/18800	0.0377172	0.167333	0.130964	ADD2/VIL1/GSN	3
BP	GO:0060561	apoptotic process involved in morphogenesis	3/541	26/18800	0.0377172	0.167333	0.130964	TGFB2/BMP7/VDR	3
BP	GO:0060706	cell differentiation involved in embryonic placenta development	3/541	26/18800	0.0377172	0.167333	0.130964	SOCS3/PLG/KRT19	3
BP	GO:0071549	cellular response to dexamethasone stimulus	3/541	26/18800	0.0377172	0.167333	0.130964	PCK2/SRD5A1/AQP1	3
BP	GO:2000050	regulation of non-canonical Wnt signaling pathway	3/541	26/18800	0.0377172	0.167333	0.130964	DAB2/SFRP4/SFRP2	3
BP	GO:0009408	response to heat	7/541	109/18800	0.0380246	0.167333	0.130964	SST/PTGS2/IGF1/TFEC/FGF1/SCARA5/MAPT	7
BP	GO:0001660	fever generation	2/541	11/18800	0.0382788	0.167333	0.130964	PTGER3/PTGS2	2
BP	GO:0002357	defense response to tumor cell	2/541	11/18800	0.0382788	0.167333	0.130964	KLF4/RBMS3	2
BP	GO:0002759	regulation of antimicrobial humoral response	2/541	11/18800	0.0382788	0.167333	0.130964	KLK7/KLK5	2
BP	GO:0003096	renal sodium ion transport	2/541	11/18800	0.0382788	0.167333	0.130964	WNK4/SLC9A3R1	2
BP	GO:0005984	disaccharide metabolic process	2/541	11/18800	0.0382788	0.167333	0.130964	FBP1/MGAM	2
BP	GO:0006002	fructose 6-phosphate metabolic process	2/541	11/18800	0.0382788	0.167333	0.130964	FBP1/GFPT2	2
BP	GO:0006020	inositol metabolic process	2/541	11/18800	0.0382788	0.167333	0.130964	IMPA2/MIOX	2
BP	GO:0006547	histidine metabolic process	2/541	11/18800	0.0382788	0.167333	0.130964	AMDHD1/FTCD	2
BP	GO:0006971	hypotonic response	2/541	11/18800	0.0382788	0.167333	0.130964	SLC4A11/SLC12A6	2
BP	GO:0010454	negative regulation of cell fate commitment	2/541	11/18800	0.0382788	0.167333	0.130964	SOSTDC1/SFRP2	2
BP	GO:0021561	facial nerve development	2/541	11/18800	0.0382788	0.167333	0.130964	NRP2/EGR2	2
BP	GO:0021604	cranial nerve structural organization	2/541	11/18800	0.0382788	0.167333	0.130964	NRP2/EGR2	2
BP	GO:0021610	facial nerve morphogenesis	2/541	11/18800	0.0382788	0.167333	0.130964	NRP2/EGR2	2
BP	GO:0031642	negative regulation of myelination	2/541	11/18800	0.0382788	0.167333	0.130964	TNFRSF21/JAM2	2
BP	GO:0034350	regulation of glial cell apoptotic process	2/541	11/18800	0.0382788	0.167333	0.130964	CCL2/AKAP12	2
BP	GO:0042135	neurotransmitter catabolic process	2/541	11/18800	0.0382788	0.167333	0.130964	PRIMA1/ABAT	2
BP	GO:0045628	regulation of T-helper 2 cell differentiation	2/541	11/18800	0.0382788	0.167333	0.130964	BCL6/ANXA1	2
BP	GO:0051386	regulation of neurotrophin TRK receptor signaling pathway	2/541	11/18800	0.0382788	0.167333	0.130964	CYFIP2/AGT	2
BP	GO:0052646	alditol phosphate metabolic process	2/541	11/18800	0.0382788	0.167333	0.130964	GK/GPD1	2
BP	GO:0061303	cornea development in camera-type eye	2/541	11/18800	0.0382788	0.167333	0.130964	ANGPTL7/WNT2B	2
BP	GO:0070471	uterine smooth muscle contraction	2/541	11/18800	0.0382788	0.167333	0.130964	AGT/ABAT	2
BP	GO:0072017	distal tubule development	2/541	11/18800	0.0382788	0.167333	0.130964	TFAP2B/WNK4	2
BP	GO:0072110	glomerular mesangial cell proliferation	2/541	11/18800	0.0382788	0.167333	0.130964	BMP7/WT1	2
BP	GO:0106049	regulation of cellular response to osmotic stress	2/541	11/18800	0.0382788	0.167333	0.130964	EFHD1/PTGS2	2
BP	GO:1905668	positive regulation of protein localization to endosome	2/541	11/18800	0.0382788	0.167333	0.130964	ABHD17C/EGF	2
BP	GO:1903522	regulation of blood circulation	13/541	260/18800	0.0385441	0.168197	0.13164	AGT/TGFB2/PTGS2/KCNJ3/TNNT2/KCNJ2/SCN2B/FGG/HRH1/ACE2/KCNE1/KCNMB2/SLC1A1	13
BP	GO:1902600	proton transmembrane transport	8/541	133/18800	0.0385524	0.168197	0.13164	SLC4A11/SLC22A18/ATP6V0D2/SLC47A1/CLCN5/SLC2A9/SLC15A2/SLC9A3R1	8
BP	GO:0045860	positive regulation of protein kinase activity	18/541	396/18800	0.0385943	0.168215	0.131654	ACSL1/AGT/DDR2/TGFB2/RASSF2/EGF/CCND2/NRG1/CCDC88A/S100A12/IGF1/PRLR/AREG/CLU/SLC1A1/FGF1/BMP2/TDGF1	18
BP	GO:0060560	developmental growth involved in morphogenesis	12/541	234/18800	0.0388515	0.16917	0.132401	CYFIP2/SLIT3/SYT1/SALL1/OLFM1/AREG/NRP2/FGF1/APOE/MAPT/SFRP2/NEDD4L	12
BP	GO:0031100	animal organ regeneration	5/541	65/18800	0.0390052	0.169175	0.132405	CLDN1/IL6/CEBPB/ANGPT2/UGT1A1	5
BP	GO:0045682	regulation of epidermis development	5/541	65/18800	0.0390052	0.169175	0.132405	VDR/ZBED2/SFRP4/CYP27B1/MAFF	5
BP	GO:0070613	regulation of protein processing	5/541	65/18800	0.0390052	0.169175	0.132405	CARD16/S100A10/GSN/CLEC3B/GAS1	5
BP	GO:2000272	negative regulation of signaling receptor activity	5/541	65/18800	0.0390052	0.169175	0.132405	LYPD1/ACE2/CRHBP/DKK2/DKK3	5
BP	GO:0001892	embryonic placenta development	6/541	87/18800	0.0394502	0.170938	0.133785	BMP7/SOCS3/PLG/CEBPB/JUNB/KRT19	6
BP	GO:0002062	chondrocyte differentiation	7/541	110/18800	0.0396473	0.17129	0.134061	WNT2B/SIX2/PTH1R/BMP2/FGFR3/COL11A1/SFRP2	7
BP	GO:0032611	interleukin-1 beta production	7/541	110/18800	0.0396473	0.17129	0.134061	TMEM106A/CARD16/IL6/TNFAIP3/IGF1/IFI16/CD36	7
BP	GO:0032651	regulation of interleukin-1 beta production	7/541	110/18800	0.0396473	0.17129	0.134061	TMEM106A/CARD16/IL6/TNFAIP3/IGF1/IFI16/CD36	7
BP	GO:0097305	response to alcohol	12/541	235/18800	0.0399243	0.171658	0.134349	PRKAA2/CLDN1/SLIT3/ADH6/CLDN5/GRAMD1B/ABAT/CRHBP/UGT1A1/INHBB/ADCY2/FOSB	12
BP	GO:0006195	purine nucleotide catabolic process	4/541	45/18800	0.039926	0.171658	0.134349	ACOT7/ACAT1/PDE10A/GDA	4
BP	GO:0007622	rhythmic behavior	4/541	45/18800	0.039926	0.171658	0.134349	SRD5A1/PTGDS/USP2/EGR2	4
BP	GO:0019692	deoxyribose phosphate metabolic process	4/541	45/18800	0.039926	0.171658	0.134349	UPP2/UPB1/DPYS/GDA	4
BP	GO:1902895	positive regulation of miRNA transcription	4/541	45/18800	0.039926	0.171658	0.134349	TGFB2/KLF4/WT1/BMP2	4
BP	GO:0010812	negative regulation of cell-substrate adhesion	5/541	66/18800	0.0412452	0.175422	0.137294	PLG/PIK3R1/ANGPT2/PTPRO/BCL6	5
BP	GO:0034605	cellular response to heat	5/541	66/18800	0.0412452	0.175422	0.137294	PTGS2/TFEC/FGF1/SCARA5/MAPT	5
BP	GO:0050435	amyloid-beta metabolic process	5/541	66/18800	0.0412452	0.175422	0.137294	ABCG1/NAT8B/IGF1/CLU/APOE	5
BP	GO:0060389	pathway-restricted SMAD protein phosphorylation	5/541	66/18800	0.0412452	0.175422	0.137294	TGFB2/BMP7/DAB2/BMP2/INHBB	5
BP	GO:1902476	chloride transmembrane transport	5/541	66/18800	0.0412452	0.175422	0.137294	SLC12A6/SLC26A9/SLC12A3/SLC1A1/GABRB3	5
BP	GO:0014066	regulation of phosphatidylinositol 3-kinase signaling	7/541	111/18800	0.0413145	0.175422	0.137294	AGT/TGFB2/EGF/ENTPD5/IGF1/DCN/SLC9A3R1	7
BP	GO:0034644	cellular response to UV	6/541	88/18800	0.041353	0.175422	0.137294	CARD16/PTGS2/MFAP4/PIK3R1/NFATC4/AQP1	6
BP	GO:1903037	regulation of leukocyte cell-cell adhesion	16/541	344/18800	0.0413904	0.175422	0.137294	TNFSF13B/IL6/TNFRSF21/HAVCR2/KLF4/NFKBIZ/MAP3K8/IGF1/HLA-DQB1/CEBPB/EGR3/PRKCQ/BCL6/ANXA1/CCL2/PAG1	16
BP	GO:0002675	positive regulation of acute inflammatory response	3/541	27/18800	0.0415525	0.175422	0.137294	PTGER3/PTGS2/IL6	3
BP	GO:0003401	axis elongation	3/541	27/18800	0.0415525	0.175422	0.137294	AREG/FGF1/SFRP2	3
BP	GO:0006706	steroid catabolic process	3/541	27/18800	0.0415525	0.175422	0.137294	SRD5A1/CYP27B1/APOE	3
BP	GO:0007263	nitric oxide mediated signal transduction	3/541	27/18800	0.0415525	0.175422	0.137294	AGT/APOE/CD36	3
BP	GO:0010875	positive regulation of cholesterol efflux	3/541	27/18800	0.0415525	0.175422	0.137294	ABCG1/APOE/PON1	3
BP	GO:0030325	adrenal gland development	3/541	27/18800	0.0415525	0.175422	0.137294	SALL1/WT1/DKK3	3
BP	GO:0033032	regulation of myeloid cell apoptotic process	3/541	27/18800	0.0415525	0.175422	0.137294	SLC7A11/APOH/ANXA1	3
BP	GO:0042537	benzene-containing compound metabolic process	3/541	27/18800	0.0415525	0.175422	0.137294	KYNU/UGT1A1/EPHX2	3
BP	GO:0071425	hematopoietic stem cell proliferation	3/541	27/18800	0.0415525	0.175422	0.137294	WNT2B/PIM1/SFRP2	3
BP	GO:0097254	renal tubular secretion	3/541	27/18800	0.0415525	0.175422	0.137294	AGT/SLC22A6/SLC22A12	3
BP	GO:1900746	regulation of vascular endothelial growth factor signaling pathway	3/541	27/18800	0.0415525	0.175422	0.137294	ADAMTS3/DCN/HRG	3
BP	GO:0050804	modulation of chemical synaptic transmission	19/541	429/18800	0.0426507	0.179713	0.140653	LRRTM1/AGT/PTGS2/SLC7A11/MCTP2/SYT1/PTN/CPEB3/PLCL1/KCNJ10/HRH1/NFATC4/SLC1A1/APOE/EGR2/NPTX2/MAPT/CCL2/AKAP12	19
BP	GO:0032309	icosanoid secretion	4/541	46/18800	0.0427714	0.179713	0.140653	CYP4A11/PLA2G12B/CYP4F2/ANXA1	4
BP	GO:0061383	trabecula morphogenesis	4/541	46/18800	0.0427714	0.179713	0.140653	TGFB2/BMP7/NRG1/RBP4	4
BP	GO:0070741	response to interleukin-6	4/541	46/18800	0.0427714	0.179713	0.140653	IL6/FGG/ST3GAL6/TDGF1	4
BP	GO:0085029	extracellular matrix assembly	4/541	46/18800	0.0427714	0.179713	0.140653	AGT/MFAP4/HAS1/ANTXR1	4
BP	GO:0010633	negative regulation of epithelial cell migration	7/541	112/18800	0.0430267	0.180614	0.141358	KLF4/MARVELD3/DCN/HRG/ANGPT2/APOH/APOE	7
BP	GO:0001776	leukocyte homeostasis	6/541	89/18800	0.0433128	0.181472	0.14203	SLC7A11/TNFSF13B/IL6/TNFAIP3/DOCK11/ANXA1	6
BP	GO:0097581	lamellipodium organization	6/541	89/18800	0.0433128	0.181472	0.14203	VIL1/CCDC88A/HRG/PIK3R1/ABLIM2/PTPRO	6
BP	GO:0007187	G protein-coupled receptor signaling pathway, coupled to cyclic nucleotide second messenger	5/541	67/18800	0.0435616	0.18217	0.142576	AGT/HRH1/PTH1R/ANXA1/CCL2	5
BP	GO:0055002	striated muscle cell development	5/541	67/18800	0.0435616	0.18217	0.142576	CAPN3/TNNT2/KRT19/SDC1/MYOZ2	5
BP	GO:0090596	sensory organ morphogenesis	13/541	266/18800	0.0448603	0.183949	0.143969	WNT2B/BMP7/SIX2/MYO6/TFAP2B/SLC1A1/TENM3/USH1C/RBP4/COL11A1/COL8A1/SLC9A3R1/SLC44A4	13
BP	GO:0051222	positive regulation of protein transport	14/541	293/18800	0.0449081	0.183949	0.143969	MPC2/RAB29/TGFB2/PTGS2/TM7SF3/ABCG1/PCK2/MYRIP/FGG/IGF1/ABAT/PIK3R1/PFKFB2/RBP4	14
BP	GO:0001837	epithelial to mesenchymal transition	9/541	162/18800	0.0449635	0.183949	0.143969	FAM83D/TGFB2/IL6/BMP7/OLFM1/DAB2/GLIPR2/BMP2/SFRP2	9
BP	GO:0003157	endocardium development	2/541	12/18800	0.0450758	0.183949	0.143969	NRG1/SOX17	2
BP	GO:0003306	Wnt signaling pathway involved in heart development	2/541	12/18800	0.0450758	0.183949	0.143969	SOX17/BMP2	2
BP	GO:0003337	mesenchymal to epithelial transition involved in metanephros morphogenesis	2/541	12/18800	0.0450758	0.183949	0.143969	SIX2/SALL1	2
BP	GO:0006534	cysteine metabolic process	2/541	12/18800	0.0450758	0.183949	0.143969	SLC7A11/GGT1	2
BP	GO:0006568	tryptophan metabolic process	2/541	12/18800	0.0450758	0.183949	0.143969	KYNU/ACMSD	2
BP	GO:0006787	porphyrin-containing compound catabolic process	2/541	12/18800	0.0450758	0.183949	0.143969	ABCC2/UGT1A1	2
BP	GO:0007501	mesodermal cell fate specification	2/541	12/18800	0.0450758	0.183949	0.143969	SIX2/SFRP2	2
BP	GO:0030656	regulation of vitamin metabolic process	2/541	12/18800	0.0450758	0.183949	0.143969	CLYBL/CYP27B1	2
BP	GO:0033015	tetrapyrrole catabolic process	2/541	12/18800	0.0450758	0.183949	0.143969	ABCC2/UGT1A1	2
BP	GO:0033540	fatty acid beta-oxidation using acyl-CoA oxidase	2/541	12/18800	0.0450758	0.183949	0.143969	EHHADH/AMACR	2
BP	GO:0034650	cortisol metabolic process	2/541	12/18800	0.0450758	0.183949	0.143969	BMP2/DKK3	2
BP	GO:0042756	drinking behavior	2/541	12/18800	0.0450758	0.183949	0.143969	AGT/ACE2	2
BP	GO:0043568	positive regulation of insulin-like growth factor receptor signaling pathway	2/541	12/18800	0.0450758	0.183949	0.143969	IGFBP5/IGF1	2
BP	GO:0044848	biological phase	2/541	12/18800	0.0450758	0.183949	0.143969	TGFB2/INHBB	2
BP	GO:0061517	macrophage proliferation	2/541	12/18800	0.0450758	0.183949	0.143969	IL33/CLU	2
BP	GO:0071285	cellular response to lithium ion	2/541	12/18800	0.0450758	0.183949	0.143969	FABP4/NFATC4	2
BP	GO:0090205	positive regulation of cholesterol metabolic process	2/541	12/18800	0.0450758	0.183949	0.143969	ABCG1/FGF1	2
BP	GO:1900272	negative regulation of long-term synaptic potentiation	2/541	12/18800	0.0450758	0.183949	0.143969	PTN/APOE	2
BP	GO:1903909	regulation of receptor clustering	2/541	12/18800	0.0450758	0.183949	0.143969	SLC7A11/GSN	2
BP	GO:1905666	regulation of protein localization to endosome	2/541	12/18800	0.0450758	0.183949	0.143969	ABHD17C/EGF	2
BP	GO:2000035	regulation of stem cell division	2/541	12/18800	0.0450758	0.183949	0.143969	SOX17/SFRP2	2
BP	GO:0070301	cellular response to hydrogen peroxide	6/541	90/18800	0.0453298	0.183949	0.143969	GPR37/IL6/TNFAIP3/FABP1/ANXA1/AQP1	6
BP	GO:0000303	response to superoxide	3/541	28/18800	0.0455758	0.183949	0.143969	BMP7/CD36/H19	3
BP	GO:0003272	endocardial cushion formation	3/541	28/18800	0.0455758	0.183949	0.143969	TGFB2/BMP7/BMP2	3
BP	GO:0009312	oligosaccharide biosynthetic process	3/541	28/18800	0.0455758	0.183949	0.143969	FBP1/ST3GAL6/FUT6	3
BP	GO:0010800	positive regulation of peptidyl-threonine phosphorylation	3/541	28/18800	0.0455758	0.183949	0.143969	TRIM6/BMP7/EGF	3
BP	GO:0019359	nicotinamide nucleotide biosynthetic process	3/541	28/18800	0.0455758	0.183949	0.143969	NAMPT/KYNU/ACMSD	3
BP	GO:0019363	pyridine nucleotide biosynthetic process	3/541	28/18800	0.0455758	0.183949	0.143969	NAMPT/KYNU/ACMSD	3
BP	GO:0032703	negative regulation of interleukin-2 production	3/541	28/18800	0.0455758	0.183949	0.143969	TNFAIP3/HAVCR2/NAV3	3
BP	GO:1903319	positive regulation of protein maturation	3/541	28/18800	0.0455758	0.183949	0.143969	S100A10/GSN/CLEC3B	3
BP	GO:0001774	microglial cell activation	4/541	47/18800	0.0457282	0.183949	0.143969	IL6/LDLR/CLU/MAPT	4
BP	GO:0002673	regulation of acute inflammatory response	4/541	47/18800	0.0457282	0.183949	0.143969	PTGER3/PTGS2/IL6/DNASE1	4
BP	GO:0031648	protein destabilization	4/541	47/18800	0.0457282	0.183949	0.143969	CAPN3/SOX17/GSN/BMP2	4
BP	GO:0032365	intracellular lipid transport	4/541	47/18800	0.0457282	0.183949	0.143969	FABP3/ABCG1/GRAMD1B/LDLR	4
BP	GO:0035315	hair cell differentiation	4/541	47/18800	0.0457282	0.183949	0.143969	MYO6/USH1C/SLC9A3R1/SLC44A4	4
BP	GO:0036230	granulocyte activation	4/541	47/18800	0.0457282	0.183949	0.143969	DNASE1/CXCL8/ENPP3/ANXA1	4
BP	GO:0050919	negative chemotaxis	4/541	47/18800	0.0457282	0.183949	0.143969	SLIT3/FLRT2/NRG1/NRP2	4
BP	GO:0055010	ventricular cardiac muscle tissue morphogenesis	4/541	47/18800	0.0457282	0.183949	0.143969	TGFB2/TNNT2/NRG1/COL11A1	4
BP	GO:0060711	labyrinthine layer development	4/541	47/18800	0.0457282	0.183949	0.143969	BMP7/SOCS3/PLG/JUNB	4
BP	GO:0061180	mammary gland epithelium development	5/541	68/18800	0.0459546	0.184525	0.144419	VDR/PRLR/AREG/CEBPB/SOSTDC1	5
BP	GO:1903317	regulation of protein maturation	5/541	68/18800	0.0459546	0.184525	0.144419	CARD16/S100A10/GSN/CLEC3B/GAS1	5
BP	GO:0006936	muscle contraction	16/541	349/18800	0.0461045	0.18496	0.14476	MYH8/AGT/PTGER3/PTGS2/KCNJ3/SLC6A8/TNNT2/KCNJ2/SCN2B/SCN7A/ABAT/ACE2/GSN/KCNE1/NEDD4L/MYOM3	16
BP	GO:0060048	cardiac muscle contraction	8/541	138/18800	0.0462378	0.185327	0.145047	KCNJ3/TNNT2/KCNJ2/SCN2B/ACE2/GSN/KCNE1/NEDD4L	8
BP	GO:0034767	positive regulation of ion transmembrane transport	9/541	163/18800	0.0464381	0.185794	0.145413	AGT/CAPN3/KCNJ2/SLC34A1/ACE2/KCNE1/WNK4/CCL2/SLC9A3R1	9
BP	GO:0050680	negative regulation of epithelial cell proliferation	9/541	163/18800	0.0464381	0.185794	0.145413	TGFB2/VDR/DAB2/MARVELD3/AQP11/APOH/APOE/SFRP2/CCL2	9
BP	GO:0070664	negative regulation of leukocyte proliferation	6/541	91/18800	0.0474044	0.18949	0.148305	TNFAIP3/TNFRSF21/HAVCR2/ENPP3/IL33/CEBPB	6
BP	GO:1901342	regulation of vasculature development	16/541	351/18800	0.0480928	0.192068	0.150323	ANGPTL7/AGT/TGFB2/IL6/TNFAIP3/CLDN5/ANGPTL3/CXCL8/KLF4/DCN/HRG/ANGPT2/FGF1/APOH/SFRP2/AQP1	16
BP	GO:0051051	negative regulation of transport	20/541	464/18800	0.0482667	0.192452	0.150623	LRRTM1/HADH/PTGER3/PTGS2/EGF/NRG1/ABAT/SFRP4/KCNE1/CRYAA/WNK4/CRHBP/CYP4F2/INHBB/APOE/CD36/ANXA1/NEDD4L/FABP5/SLC9A3R1	20
BP	GO:0033344	cholesterol efflux	5/541	69/18800	0.0484243	0.192452	0.150623	ABCG1/APOM/EGF/APOE/PON1	5
BP	GO:0050922	negative regulation of chemotaxis	5/541	69/18800	0.0484243	0.192452	0.150623	MMP28/HRG/ANGPT2/PTPRO/CCL2	5
BP	GO:0070830	bicellular tight junction assembly	5/541	69/18800	0.0484243	0.192452	0.150623	CLDN1/CLDN5/PECAM1/MARVELD3/CLDN10	5
BP	GO:0090288	negative regulation of cellular response to growth factor stimulus	7/541	115/18800	0.0484357	0.192452	0.150623	AGT/CHRDL1/DCN/HRG/SOSTDC1/SOST/SFRP2	7
BP	GO:0007369	gastrulation	10/541	190/18800	0.0486168	0.192452	0.150623	BMP7/KLF4/SIX2/NAT8B/SOX17/KIF16B/HNF4A/COL11A1/SFRP2/COL8A1	10
BP	GO:0003044	regulation of systemic arterial blood pressure mediated by a chemical signal	4/541	48/18800	0.0487962	0.192452	0.150623	AGT/SLC2A5/ACE2/SUCNR1	4
BP	GO:0010761	fibroblast migration	4/541	48/18800	0.0487962	0.192452	0.150623	PAK3/DDR2/HAS1/AKAP12	4
BP	GO:0031641	regulation of myelination	4/541	48/18800	0.0487962	0.192452	0.150623	PTN/TNFRSF21/JAM2/EGR2	4
BP	GO:0043114	regulation of vascular permeability	4/541	48/18800	0.0487962	0.192452	0.150623	CLDN5/HRH1/APOE/AKAP12	4
BP	GO:0048146	positive regulation of fibroblast proliferation	4/541	48/18800	0.0487962	0.192452	0.150623	AGT/DDR2/IGF1/AQP1	4
BP	GO:0061028	establishment of endothelial barrier	4/541	48/18800	0.0487962	0.192452	0.150623	CLDN1/ICAM1/CLDN5/PECAM1	4
BP	GO:0097720	calcineurin-mediated signaling	4/541	48/18800	0.0487962	0.192452	0.150623	NRG1/IGF1/NFATC4/MYOZ2	4
BP	GO:1902003	regulation of amyloid-beta formation	4/541	48/18800	0.0487962	0.192452	0.150623	ABCG1/IGF1/CLU/APOE	4
BP	GO:0044089	positive regulation of cellular component biogenesis	21/541	494/18800	0.049402	0.194107	0.151918	LRRTM1/CLDN1/AGT/BMP7/VIL1/DOCK11/CLDN5/FLRT2/NRG1/CCDC88A/S100A10/HRG/ACE2/PIK3R1/TPBG/CLU/NAV3/SDC1/CD36/MAPT/CDC42EP5	21
BP	GO:0008584	male gonad development	8/541	140/18800	0.0495735	0.194107	0.151918	WNT2B/TGFB2/GFRA1/SRD5A1/WT1/INHBB/SDC1/SFRP2	8
BP	GO:0000305	response to oxygen radical	3/541	29/18800	0.0497845	0.194107	0.151918	BMP7/CD36/H19	3
BP	GO:0006656	phosphatidylcholine biosynthetic process	3/541	29/18800	0.0497845	0.194107	0.151918	FABP3/FABP5/SLC44A4	3
BP	GO:0010453	regulation of cell fate commitment	3/541	29/18800	0.0497845	0.194107	0.151918	SOX17/SOSTDC1/SFRP2	3
BP	GO:0017145	stem cell division	3/541	29/18800	0.0497845	0.194107	0.151918	TGFB2/SOX17/SFRP2	3
BP	GO:0019674	NAD metabolic process	3/541	29/18800	0.0497845	0.194107	0.151918	PCK2/ALDOB/GPD1	3
BP	GO:0061082	myeloid leukocyte cytokine production	3/541	29/18800	0.0497845	0.194107	0.151918	TGFB2/CD36/BCL6	3
BP	GO:0065005	protein-lipid complex assembly	3/541	29/18800	0.0497845	0.194107	0.151918	MTTP/APOM/APOE	3
BP	GO:0070977	bone maturation	3/541	29/18800	0.0497845	0.194107	0.151918	IGF1/BMP2/FGFR3	3
BP	GO:0097421	liver regeneration	3/541	29/18800	0.0497845	0.194107	0.151918	CLDN1/IL6/CEBPB	3
BP	GO:1902430	negative regulation of amyloid-beta formation	3/541	29/18800	0.0497845	0.194107	0.151918	IGF1/CLU/APOE	3
BP	GO:1902547	regulation of cellular response to vascular endothelial growth factor stimulus	3/541	29/18800	0.0497845	0.194107	0.151918	ADAMTS3/DCN/HRG	3
CC	GO:0045177	apical part of cell	54/563	424/19594	2.70365e-20	1.05713e-17	9.10702e-18	CLDN1/SLC7A13/SLC39A4/DDR2/PLD1/SLC7A11/MREG/CDHR5/SLC4A11/SLC22A18/ACY3/SLC23A1/CYP4A11/SLC7A8/ATP6V0D2/FABP1/SLC34A1/SLC26A9/UMOD/SLC2A5/ABCC2/SLC12A3/ENPP3/CUBN/LDLR/SLC5A12/SLC47A1/SLC6A19/SLC22A8/ACE2/KCNE1/CLCN5/PTH1R/SLC1A1/CYP4F2/SLC22A12/USH1C/SLC2A2/TDGF1/CD300LG/DPEP1/PTPRO/CD36/SLC22A11/ANXA1/RHCG/MGAM/SLC2A9/SLC15A2/AQP1/CA4/SLC9A3R1/SLC44A4/SLC22A4	54
CC	GO:0016324	apical plasma membrane	49/563	358/19594	7.72665e-20	1.51056e-17	1.30133e-17	CLDN1/SLC7A13/SLC39A4/DDR2/PLD1/MREG/CDHR5/SLC4A11/SLC22A18/ACY3/SLC23A1/CYP4A11/SLC7A8/ATP6V0D2/SLC34A1/SLC26A9/UMOD/SLC2A5/ABCC2/SLC12A3/ENPP3/CUBN/SLC5A12/SLC47A1/SLC6A19/SLC22A8/ACE2/KCNE1/PTH1R/SLC1A1/CYP4F2/SLC22A12/SLC2A2/TDGF1/CD300LG/DPEP1/PTPRO/CD36/SLC22A11/ANXA1/RHCG/MGAM/SLC2A9/SLC15A2/AQP1/CA4/SLC9A3R1/SLC44A4/SLC22A4	49
CC	GO:0062023	collagen-containing extracellular matrix	49/563	429/19594	1.51422e-16	1.97353e-14	1.70017e-14	ANGPTL7/AGT/COL26A1/WNT2B/TGFB2/ICAM1/ATRNL1/BMP7/MMP28/VWF/ANGPTL3/AZGP1/PLG/KNG1/FGG/CCDC80/OMD/ADAMTS3/S100A10/MFAP4/TINAG/DPT/DCN/TNC/HRG/OGN/ANGPT2/SERPINA5/CLU/NID2/SLPI/CLEC3B/COCH/APOH/CDON/APOE/LTBP2/SOST/ANXA1/COL11A1/SBSPON/PCOLCE/SFRP2/COL8A1/SCARA3/DEFA1/RARRES2/GPC5/LUM	49
CC	GO:0005903	brush border	17/563	102/19594	4.87587e-09	4.76617e-07	4.106e-07	SLC7A11/VIL1/CDHR5/DCXR/MTTP/SLC23A1/SLC34A1/CUBN/SLC6A19/ACE2/SLC22A12/USH1C/SLC2A2/CD36/AQP1/CA4/SLC9A3R1	17
CC	GO:0016323	basolateral plasma membrane	25/563	226/19594	9.03007e-09	7.06152e-07	6.08342e-07	CLDN1/BSND/SLC22A7/SLC39A5/SLC4A11/MTTP/SLC12A6/SLC7A8/SLC4A4/UMOD/SLC7A7/LDLR/SLC13A3/SLC22A6/SLC47A1/KCNJ10/SLC22A8/ABCC6/PTH1R/CD300LG/ANXA1/SLCO4C1/RHCG/SLC2A9/AQP1	25
CC	GO:0009925	basal plasma membrane	26/563	251/19594	1.80086e-08	1.17356e-06	1.01101e-06	CLDN1/BSND/SLC22A7/SLC39A5/SLC4A11/MTTP/SLC12A6/SLC23A1/SLC7A8/SLC4A4/UMOD/SLC7A7/LDLR/SLC13A3/SLC22A6/SLC47A1/KCNJ10/SLC22A8/ABCC6/PTH1R/CD300LG/ANXA1/SLCO4C1/RHCG/SLC2A9/AQP1	26
CC	GO:0031526	brush border membrane	12/563	55/19594	4.00692e-08	2.23815e-06	1.92814e-06	SLC7A11/CDHR5/MTTP/SLC34A1/CUBN/SLC6A19/ACE2/SLC22A12/CD36/AQP1/CA4/SLC9A3R1	12
CC	GO:0045178	basal part of cell	26/563	269/19594	7.3857e-08	3.60976e-06	3.10977e-06	CLDN1/BSND/SLC22A7/SLC39A5/SLC4A11/MTTP/SLC12A6/SLC23A1/SLC7A8/SLC4A4/UMOD/SLC7A7/LDLR/SLC13A3/SLC22A6/SLC47A1/KCNJ10/SLC22A8/ABCC6/PTH1R/CD300LG/ANXA1/SLCO4C1/RHCG/SLC2A9/AQP1	26
CC	GO:0031091	platelet alpha granule	14/563	91/19594	3.11409e-07	1.3529e-05	1.16551e-05	TGFB2/VWF/PECAM1/PLG/KNG1/EGF/FGG/IGF1/HRG/SERPINA5/CLU/ALB/CD36/ISLR	14
CC	GO:0098862	cluster of actin-based cell projections	18/563	158/19594	7.0251e-07	2.74682e-05	2.36635e-05	SLC7A11/VIL1/CDHR5/DCXR/MTTP/SLC23A1/SLC34A1/CUBN/SLC6A19/ACE2/PVALB/SLC22A12/USH1C/SLC2A2/CD36/AQP1/CA4/SLC9A3R1	18
CC	GO:0031093	platelet alpha granule lumen	11/563	67/19594	2.99023e-06	0.000106289	9.15668e-05	TGFB2/VWF/PLG/KNG1/EGF/FGG/IGF1/HRG/CLU/ALB/ISLR	11
CC	GO:0005782	peroxisomal matrix	9/563	50/19594	1.09703e-05	0.000329952	0.00028425	PHYH/HAO2/ACOT4/FABP1/DAO/EHHADH/AMACR/PIPOX/EPHX2	9
CC	GO:0031907	microbody lumen	9/563	50/19594	1.09703e-05	0.000329952	0.00028425	PHYH/HAO2/ACOT4/FABP1/DAO/EHHADH/AMACR/PIPOX/EPHX2	9
CC	GO:0005759	mitochondrial matrix	31/563	473/19594	1.91857e-05	0.000535829	0.00046161	IDH2/HADH/FAHD1/ECHS1/PCCB/DHRS2/LACTB2/HIBCH/GLS/ACAT1/HOGA1/ALDH6A1/PCK2/DHTKD1/PDSS1/AK4/ACAA2/PC/ABAT/PCCA/ACSM2B/ETNPPL/GLYAT/ACADSB/ACSM3/ALDH1L2/DMGDH/AGXT2/MCCC2/ALDH4A1/ACSM2A	31
CC	GO:0034774	secretory granule lumen	24/563	322/19594	2.19153e-05	0.00057126	0.000492134	CXCL1/TGFB2/FRK/GGH/S100P/VWF/PLG/KNG1/EGF/FGG/S100A12/IGF1/HRG/GSN/CLU/ALB/SLPI/CLEC3B/APOH/AOC1/ISLR/DEFA1/RARRES2/FABP5	24
CC	GO:0060205	cytoplasmic vesicle lumen	24/563	325/19594	2.54829e-05	0.000622739	0.000536483	CXCL1/TGFB2/FRK/GGH/S100P/VWF/PLG/KNG1/EGF/FGG/S100A12/IGF1/HRG/GSN/CLU/ALB/SLPI/CLEC3B/APOH/AOC1/ISLR/DEFA1/RARRES2/FABP5	24
CC	GO:0031983	vesicle lumen	24/563	327/19594	2.81441e-05	0.000647314	0.000557653	CXCL1/TGFB2/FRK/GGH/S100P/VWF/PLG/KNG1/EGF/FGG/S100A12/IGF1/HRG/GSN/CLU/ALB/SLPI/CLEC3B/APOH/AOC1/ISLR/DEFA1/RARRES2/FABP5	24
CC	GO:0005788	endoplasmic reticulum lumen	23/563	311/19594	3.65521e-05	0.000793993	0.000684016	COL26A1/IGFBP5/PTGS2/IL6/CHRDL1/MTTP/KNG1/PLAUR/FGG/TSPAN5/TNC/ACE2/CLU/CES2/ALB/ENAM/IGFBP3/APOE/IGFBP1/COL11A1/COL8A1/SLC27A2/MSLN	23
CC	GO:0034358	plasma lipoprotein particle	7/563	36/19594	6.30063e-05	0.00123177	0.00106116	LPA/APOM/LDLR/CLU/APOH/APOE/PON1	7
CC	GO:1990777	lipoprotein particle	7/563	36/19594	6.30063e-05	0.00123177	0.00106116	LPA/APOM/LDLR/CLU/APOH/APOE/PON1	7
CC	GO:0031528	microvillus membrane	6/563	26/19594	7.7247e-05	0.00143827	0.00123905	S100P/CDHR5/MTTP/SLC7A8/DPEP1/SLC9A3R1	6
CC	GO:0032994	protein-lipid complex	7/563	39/19594	0.00010775	0.00191501	0.00164976	LPA/APOM/LDLR/CLU/APOH/APOE/PON1	7
CC	GO:0005777	peroxisome	13/563	141/19594	0.000218486	0.0035595	0.00306647	IDH2/ACSL1/PHYH/HAO2/ACOT4/FABP1/DAO/EHHADH/AMACR/PIPOX/AOC1/SLC27A2/EPHX2	13
CC	GO:0042579	microbody	13/563	141/19594	0.000218486	0.0035595	0.00306647	IDH2/ACSL1/PHYH/HAO2/ACOT4/FABP1/DAO/EHHADH/AMACR/PIPOX/AOC1/SLC27A2/EPHX2	13
CC	GO:0005902	microvillus	10/563	90/19594	0.000257624	0.00402924	0.00347114	VIL1/S100P/CDHR5/DCXR/MTTP/SLC7A8/MYO6/USH1C/DPEP1/SLC9A3R1	10
CC	GO:0072562	blood microparticle	13/563	147/19594	0.000329147	0.00494986	0.00426425	AGT/PLG/KNG1/FGG/AFM/HRG/GSN/CLU/CFH/ALB/APOE/PON1/C1S	13
CC	GO:0030665	clathrin-coated vesicle membrane	11/563	111/19594	0.000353382	0.00511749	0.00440866	TYRP1/SYT1/REEP6/EGF/MYO6/DAB2/LDLR/HLA-DQB1/AREG/GAD1/APOE	11
CC	GO:0005796	Golgi lumen	10/563	104/19594	0.000822343	0.0114834	0.00989285	MUC15/MMP16/UMOD/OMD/DCN/OGN/SDC1/DEFA1/GPC5/LUM	10
CC	GO:0031253	cell projection membrane	21/563	339/19594	0.000858536	0.0115754	0.0099721	LAMP5/SLC7A11/S100P/CDHR5/MTTP/SLC7A8/SLC34A1/MYO6/UMOD/CUBN/SLC6A19/ACE2/SLC22A12/RAB25/ANTXR1/DPEP1/CD36/MAPT/AQP1/CA4/SLC9A3R1	21
CC	GO:0034364	high-density lipoprotein particle	5/563	27/19594	0.000919512	0.0119843	0.0103243	APOM/CLU/APOH/APOE/PON1	5
CC	GO:0030136	clathrin-coated vesicle	14/563	192/19594	0.00135473	0.0170871	0.0147203	TYRP1/SYT1/PANK1/VWF/REEP6/EGF/MYO6/DAB2/LDLR/HLA-DQB1/AREG/GAD1/APOE/AP1M2	14
CC	GO:0042581	specific granule	12/563	160/19594	0.00230582	0.0277987	0.0239483	PLD1/CXCL1/FRK/GGH/PLAUR/SLC2A3/SLC2A5/SLPI/AOC1/CD36/SLCO4C1/SLC27A2	12
CC	GO:0097386	glial cell projection	5/563	33/19594	0.00234618	0.0277987	0.0239483	SLC7A11/SCN7A/KCNJ10/SLC1A1/MAPT	5
CC	GO:0031225	anchored component of membrane	12/563	169/19594	0.00361216	0.0415398	0.0357861	GFRA1/XPNPEP2/ENPP6/PLAUR/UMOD/LYPD1/TDGF1/DPEP1/GAS1/MSLN/CA4/GPC5	12
CC	GO:0098858	actin-based cell projection	14/563	217/19594	0.00416468	0.0464502	0.0400163	VIL1/S100P/CDHR5/DCXR/MTTP/OSBPL3/SLC7A8/MYO6/PVALB/USH1C/ANTXR1/DPEP1/FARP1/SLC9A3R1	14
CC	GO:0034362	low-density lipoprotein particle	3/563	12/19594	0.00427674	0.0464502	0.0400163	APOM/LDLR/APOE	3
CC	GO:0030669	clathrin-coated endocytic vesicle membrane	7/563	72/19594	0.00457459	0.047902	0.041267	TYRP1/SYT1/EGF/LDLR/HLA-DQB1/AREG/APOE	7
CC	GO:0045334	clathrin-coated endocytic vesicle	8/563	91/19594	0.00465544	0.047902	0.041267	TYRP1/SYT1/EGF/MYO6/LDLR/HLA-DQB1/AREG/APOE	8
CC	GO:0031089	platelet dense granule lumen	3/563	14/19594	0.00678001	0.0662746	0.0570948	CLEC3B/APOH/RARRES2	3
CC	GO:0044214	spanning component of plasma membrane	3/563	14/19594	0.00678001	0.0662746	0.0570948	CDHR5/SLC4A4/SLC15A2	3
CC	GO:0097440	apical dendrite	3/563	15/19594	0.00829623	0.0791178	0.0681591	CPEB3/CLU/SLC1A1	3
CC	GO:0042599	lamellar body	3/563	17/19594	0.0118824	0.109349	0.0942029	KLK7/KLK5/NAPSA	3
CC	GO:0005775	vacuolar lumen	11/563	174/19594	0.0120256	0.109349	0.0942029	FRK/GGH/OMD/CUBN/DCN/OGN/SDC1/DEFA1/FABP5/GPC5/LUM	11
CC	GO:0009897	external side of plasma membrane	22/563	455/19594	0.0126384	0.11231	0.0967534	ICAM1/KCNJ3/GFRA1/ABCG1/CLEC2B/AZGP1/PLG/FGG/ENPP3/PRLR/CUBN/ACKR4/LDLR/ANPEP/SERPINA5/ANTXR1/SDC1/CD36/SLC22A11/ANXA1/SCARA5/CA4	22
CC	GO:0030662	coated vesicle membrane	11/563	176/19594	0.0130131	0.113069	0.0974078	TYRP1/SYT1/REEP6/EGF/MYO6/DAB2/LDLR/HLA-DQB1/AREG/GAD1/APOE	11
CC	GO:0035579	specific granule membrane	7/563	91/19594	0.015831	0.134563	0.115925	PLD1/PLAUR/SLC2A3/SLC2A5/CD36/SLCO4C1/SLC27A2	7
CC	GO:0034361	very-low-density lipoprotein particle	3/563	20/19594	0.0186936	0.152275	0.131183	APOM/APOH/APOE	3
CC	GO:0034385	triglyceride-rich plasma lipoprotein particle	3/563	20/19594	0.0186936	0.152275	0.131183	APOM/APOH/APOE	3
CC	GO:0016234	inclusion body	6/563	74/19594	0.0195574	0.15606	0.134444	PRDM16/MIOX/SFMBT2/CLU/PRKCQ/MAPT	6
CC	GO:0042827	platelet dense granule	3/563	21/19594	0.0213534	0.160348	0.138138	CLEC3B/APOH/RARRES2	3
CC	GO:0089717	spanning component of membrane	3/563	21/19594	0.0213534	0.160348	0.138138	CDHR5/SLC4A4/SLC15A2	3
CC	GO:0097038	perinuclear endoplasmic reticulum	3/563	21/19594	0.0213534	0.160348	0.138138	OSBPL3/PIK3R1/CLU	3
CC	GO:0043202	lysosomal lumen	7/563	97/19594	0.0217351	0.160348	0.138138	OMD/CUBN/DCN/OGN/SDC1/GPC5/LUM	7
CC	GO:0098644	complex of collagen trimers	3/563	22/19594	0.0242091	0.175292	0.151012	COL11A1/COL8A1/LUM	3
CC	GO:0045121	membrane raft	16/563	326/19594	0.0269944	0.191905	0.165324	ADD2/PTGS2/ICAM1/PECAM1/SLC34A1/S100A10/SLC22A6/ACE2/KCNE1/SLC1A1/ADCY2/TDGF1/CD36/MAPT/SLC9A3R1/PAG1	16
CC	GO:0098857	membrane microdomain	16/563	327/19594	0.0276623	0.193142	0.16639	ADD2/PTGS2/ICAM1/PECAM1/SLC34A1/S100A10/SLC22A6/ACE2/KCNE1/SLC1A1/ADCY2/TDGF1/CD36/MAPT/SLC9A3R1/PAG1	16
CC	GO:0099243	extrinsic component of synaptic membrane	2/563	10/19594	0.0318302	0.218344	0.188101	CNKSR2/FARP1	2
CC	GO:0035580	specific granule lumen	5/563	62/19594	0.0325679	0.219553	0.189142	CXCL1/FRK/GGH/SLPI/AOC1	5
CC	GO:0005771	multivesicular body	5/563	63/19594	0.034572	0.222785	0.191927	GFRA1/CRHBP/NAPSA/CD300LG/NEDD4L	5
CC	GO:0042383	sarcolemma	8/563	131/19594	0.0354886	0.222785	0.191927	KCNJ3/CAPN3/KCNJ2/SLC2A5/KRT19/ANXA1/SGCG/AQP1	8
CC	GO:0030667	secretory granule membrane	15/563	312/19594	0.0367941	0.222785	0.191927	PLD1/SYT1/PECAM1/PLAUR/SLC2A3/SLC2A5/MOXD1/ANPEP/SERPINA5/CD36/SLCO4C1/MGAM/SLC27A2/FABP5/CA4	15
CC	GO:0070160	tight junction	8/563	132/19594	0.0368711	0.222785	0.191927	CLDN1/CLDN5/JAM2/MARVELD3/CLDN10/WNK4/ILDR1/AOC1	8
CC	GO:0005581	collagen trimer	6/563	86/19594	0.037387	0.222785	0.191927	COL26A1/COL11A1/COL8A1/SCARA3/C1QTNF7/LUM	6
CC	GO:0031045	dense core granule	3/563	26/19594	0.0375791	0.222785	0.191927	SYT1/MYRIP/CRHBP	3
CC	GO:0005614	interstitial matrix	2/563	11/19594	0.0381754	0.222785	0.191927	CCDC80/TNC	2
CC	GO:1904090	peptidase inhibitor complex	2/563	11/19594	0.0381754	0.222785	0.191927	CARD16/SERPINA5	2
CC	GO:1905286	serine-type peptidase complex	2/563	11/19594	0.0381754	0.222785	0.191927	PLAUR/CFH	2
CC	GO:0030135	coated vesicle	14/563	290/19594	0.041442	0.238291	0.205285	TYRP1/SYT1/PANK1/VWF/REEP6/EGF/MYO6/DAB2/LDLR/HLA-DQB1/AREG/GAD1/APOE/AP1M2	14
CC	GO:0005583	fibrillar collagen trimer	2/563	12/19594	0.0449551	0.24757	0.213279	COL11A1/LUM	2
CC	GO:0060198	clathrin-sculpted vesicle	2/563	12/19594	0.0449551	0.24757	0.213279	SYT1/GAD1	2
CC	GO:0098643	banded collagen fibril	2/563	12/19594	0.0449551	0.24757	0.213279	COL11A1/LUM	2
MF	GO:0008201	heparin binding	27/557	168/18410	1.17733e-12	5.21453e-10	4.10384e-10	SLIT3/BMP7/PTN/NELL2/ANGPTL3/LPA/CXCL8/KNG1/CCDC80/ADAMTS3/HRG/NRP2/SERPINA5/CFH/CCL15/CLEC3B/NELL1/FGF1/APOH/APOE/LTBP2/SOST/AOC1/COL11A1/PCOLCE2/PCOLCE/RSPO1	27
MF	GO:1901681	sulfur compound binding	34/557	267/18410	1.39988e-12	5.21453e-10	4.10384e-10	ACOT7/SLIT3/BMP7/PTN/PANK1/NELL2/ALDH6A1/ANGPTL3/DHTKD1/LPA/CXCL8/KNG1/CCDC80/PC/ADAMTS3/PCCA/HRG/NRP2/SERPINA5/CFH/CCL15/CLEC3B/NELL1/PNPLA3/FGF1/APOH/APOE/LTBP2/SOST/AOC1/COL11A1/PCOLCE2/PCOLCE/RSPO1	34
MF	GO:0015291	secondary active transmembrane transporter activity	31/557	240/18410	9.5652e-12	2.37536e-09	1.86941e-09	SLC7A11/SLC13A2/SLC22A7/SLC16A4/SLC4A11/SLC6A8/SLC22A18/SLC12A6/SLC23A1/SLC7A8/SLC4A4/SLC34A1/SLC26A9/SLC12A3/SLC5A12/SLC13A3/SLC22A6/SLC47A1/SLC6A19/SLC22A8/CLCN5/SLC5A10/SLC1A1/SLC13A1/SLC16A9/SLC5A9/SLC22A11/SLCO4C1/SLC2A9/SLC15A2/SLC22A4	31
MF	GO:0005539	glycosaminoglycan binding	29/557	234/18410	1.24158e-10	2.10477e-08	1.65646e-08	SLIT3/BMP7/PTN/NELL2/ANGPTL3/LPA/CXCL8/LAYN/KNG1/CCDC80/ADAMTS3/DCN/HRG/NRP2/SERPINA5/CFH/CCL15/CLEC3B/NELL1/FGF1/APOH/APOE/LTBP2/SOST/AOC1/COL11A1/PCOLCE2/PCOLCE/RSPO1	29
MF	GO:0008509	anion transmembrane transporter activity	34/557	315/18410	1.4126e-10	2.10477e-08	1.65646e-08	MPC2/SLC7A11/BSND/SLC2A14/SLC13A2/SLC22A7/SLC4A11/SLC6A8/SLC12A6/SLC23A1/SLC7A8/SLC4A4/SLC26A9/SLC2A3/ABCC2/SLC12A3/CLCNKB/SLC5A12/SLC13A3/SLC22A6/SLC47A1/SLC22A8/CLCN5/ABCC6/SFXN2/SLC1A1/SLC13A1/GABRB3/SLC2A2/CD36/SLC22A11/SLCO4C1/SLC9A3R1/SLC44A4	34
MF	GO:0008514	organic anion transmembrane transporter activity	25/557	186/18410	4.26267e-10	5.29281e-08	4.16545e-08	MPC2/SLC7A11/SLC2A14/SLC13A2/SLC22A7/SLC4A11/SLC6A8/SLC23A1/SLC7A8/SLC4A4/SLC26A9/SLC2A3/ABCC2/SLC5A12/SLC13A3/SLC22A6/SLC47A1/SFXN2/SLC1A1/SLC2A2/CD36/SLC22A11/SLCO4C1/SLC9A3R1/SLC44A4	25
MF	GO:0015293	symporter activity	21/557	144/18410	2.40716e-09	2.5619e-07	2.01622e-07	SLC13A2/SLC16A4/SLC4A11/SLC6A8/SLC22A18/SLC12A6/SLC23A1/SLC4A4/SLC34A1/SLC12A3/SLC5A12/SLC13A3/SLC6A19/SLC5A10/SLC1A1/SLC13A1/SLC16A9/SLC5A9/SLC2A9/SLC15A2/SLC22A4	21
MF	GO:0046943	carboxylic acid transmembrane transporter activity	21/557	164/18410	2.55875e-08	2.35963e-06	1.85703e-06	MPC2/SLC7A13/SLC7A11/SLC13A2/SLC16A4/SLC23A1/SLC7A8/SLC26A9/ABCC2/SLC7A7/SLC5A12/SLC13A3/SLC47A1/SLC6A19/SFXN2/SLC1A1/SLC16A9/CD36/SLC27A2/SLC9A3R1/SLC22A4	21
MF	GO:0005342	organic acid transmembrane transporter activity	21/557	165/18410	2.85056e-08	2.35963e-06	1.85703e-06	MPC2/SLC7A13/SLC7A11/SLC13A2/SLC16A4/SLC23A1/SLC7A8/SLC26A9/ABCC2/SLC7A7/SLC5A12/SLC13A3/SLC47A1/SLC6A19/SFXN2/SLC1A1/SLC16A9/CD36/SLC27A2/SLC9A3R1/SLC22A4	21
MF	GO:0022853	active ion transmembrane transporter activity	26/557	254/18410	6.32291e-08	4.71057e-06	3.70722e-06	SLC7A11/SLC13A2/SLC22A7/SLC4A11/SLC6A8/SLC12A6/SLC23A1/SLC4A4/SLC34A1/SLC26A9/ABCC2/SLC12A3/SLC5A12/SLC13A3/SLC22A6/SLC22A8/ABCC6/SLC5A10/SLC1A1/SLC13A1/SLC5A9/SLC22A11/SLCO4C1/SLC2A9/SLC15A2/SLC22A4	26
MF	GO:0022804	active transmembrane transporter activity	34/557	404/18410	8.22269e-08	5.569e-06	4.38281e-06	SLC7A11/SLC13A2/SLC22A7/SLC16A4/ABCG1/SLC4A11/SLC6A8/SLC22A18/SLC12A6/SLC23A1/SLC7A8/SLC4A4/SLC34A1/SLC26A9/ABCC2/SLC12A3/SLC5A12/SLC13A3/SLC22A6/SLC47A1/SLC6A19/SLC22A8/CLCN5/ABCC6/SLC5A10/SLC1A1/SLC13A1/SLC16A9/SLC5A9/SLC22A11/SLCO4C1/SLC2A9/SLC15A2/SLC22A4	34
MF	GO:0016829	lyase activity	22/557	195/18410	1.19534e-07	7.41907e-06	5.83881e-06	FAHD1/CLYBL/ECHDC3/ENOSF1/ECHS1/NPL/GOT1/GGACT/HOGA1/PCK2/ASL/CYP17A1/ALDOB/EHHADH/GAD1/ETNPPL/CA12/FTCD/ADCY2/CA10/ACMSD/CA4	22
MF	GO:0033293	monocarboxylic acid binding	14/557	81/18410	1.2946e-07	7.41907e-06	5.83881e-06	FABP3/VDR/FABP1/PC/FABP4/AFM/PCCA/PTGDS/SERPINA5/GSTA1/ALB/UGT1A1/HNF4A/FABP5	14
MF	GO:0015144	carbohydrate transmembrane transporter activity	10/557	41/18410	2.85527e-07	1.51941e-05	1.19578e-05	SLC2A14/SLC23A1/SLC2A3/SLC2A5/AQP11/SLC5A10/SLC2A2/SLC5A9/SLC2A9/AQP1	10
MF	GO:0015145	monosaccharide transmembrane transporter activity	8/557	25/18410	4.58404e-07	2.27674e-05	1.7918e-05	SLC2A14/SLC23A1/SLC2A3/SLC2A5/SLC5A10/SLC2A2/SLC5A9/SLC2A9	8
MF	GO:0015294	solute:cation symporter activity	15/557	104/18410	5.38591e-07	2.42155e-05	1.90576e-05	SLC13A2/SLC6A8/SLC12A6/SLC23A1/SLC4A4/SLC34A1/SLC12A3/SLC5A12/SLC13A3/SLC5A10/SLC1A1/SLC13A1/SLC5A9/SLC2A9/SLC15A2	15
MF	GO:0019842	vitamin binding	18/557	148/18410	5.52568e-07	2.42155e-05	1.90576e-05	PHYH/GOT1/VDR/DHTKD1/PC/CUBN/PSAT1/AFM/ABAT/PCCA/GAD1/ETNPPL/ALB/FTCD/KYNU/ALDH1A2/AGXT2/RBP4	18
MF	GO:0051119	sugar transmembrane transporter activity	8/557	27/18410	8.91951e-07	3.69169e-05	2.90536e-05	SLC2A14/SLC23A1/SLC2A3/SLC2A5/SLC5A10/SLC2A2/SLC5A9/SLC2A9	8
MF	GO:0016614	oxidoreductase activity, acting on CH-OH group of donors	17/557	140/18410	1.16344e-06	4.56189e-05	3.59022e-05	IDH2/HADH/DHRS2/ADH6/DCXR/HAO2/DHDH/MIOX/GPD1/SORD/EHHADH/AKR7A3/CRYL1/CYP4F3/CHDH/CYP4F2/RDH12	17
MF	GO:0015370	solute:sodium symporter activity	12/557	72/18410	1.53531e-06	5.71903e-05	4.50088e-05	SLC13A2/SLC6A8/SLC23A1/SLC4A4/SLC34A1/SLC12A3/SLC5A12/SLC13A3/SLC5A10/SLC1A1/SLC13A1/SLC5A9	12
MF	GO:0016830	carbon-carbon lyase activity	10/557	50/18410	2.04804e-06	7.26566e-05	5.71808e-05	FAHD1/CLYBL/NPL/GOT1/HOGA1/PCK2/CYP17A1/ALDOB/GAD1/ACMSD	10
MF	GO:0005355	glucose transmembrane transporter activity	7/557	22/18410	2.56658e-06	8.69137e-05	6.84012e-05	SLC2A14/SLC2A3/SLC2A5/SLC5A10/SLC2A2/SLC5A9/SLC2A9	7
MF	GO:0015149	hexose transmembrane transporter activity	7/557	23/18410	3.59355e-06	0.0001164	9.16066e-05	SLC2A14/SLC2A3/SLC2A5/SLC5A10/SLC2A2/SLC5A9/SLC2A9	7
MF	GO:0031406	carboxylic acid binding	18/557	173/18410	5.35679e-06	0.000166284	0.000130865	FABP3/PHYH/VDR/FABP1/PC/FABP4/AFM/PCCA/PTGDS/SERPINA5/GSTA1/TM4SF5/SLC1A1/ALB/FTCD/UGT1A1/HNF4A/FABP5	18
MF	GO:0008235	metalloexopeptidase activity	11/557	72/18410	1.00057e-05	0.000298171	0.000234661	CPZ/PEPD/XPNPEP2/MMP16/FOLH1B/ANPEP/CPXM1/ACE2/CNDP1/DPEP1/FOLH1	11
MF	GO:0005504	fatty acid binding	9/557	49/18410	1.38951e-05	0.000387796	0.000305196	FABP3/FABP1/FABP4/AFM/PTGDS/GSTA1/ALB/HNF4A/FABP5	9
MF	GO:0015103	inorganic anion transmembrane transporter activity	16/557	151/18410	1.40544e-05	0.000387796	0.000305196	BSND/SLC4A11/SLC12A6/SLC4A4/SLC26A9/ABCC2/SLC12A3/CLCNKB/SLC22A6/SLC22A8/CLCN5/ABCC6/SLC1A1/SLC13A1/GABRB3/SLC22A11	16
MF	GO:0005201	extracellular matrix structural constituent	17/557	172/18410	1.91661e-05	0.000509956	0.000401336	VWF/FGG/UMOD/MFAP4/DPT/DCN/TNC/TFPI2/OGN/NID2/ENAM/LTBP2/COL11A1/SBSPON/PCOLCE/COL8A1/LUM	17
MF	GO:0008083	growth factor activity	16/557	162/18410	3.37919e-05	0.000868102	0.000683197	AGT/CXCL1/TGFB2/IL6/BMP7/PTN/ANGPTL3/EGF/NRG1/IGF1/OGN/AREG/FGF1/BMP2/INHBB/TDGF1	16
MF	GO:0008483	transaminase activity	6/557	23/18410	4.85721e-05	0.00120621	0.000949285	GOT1/PSAT1/ABAT/GFPT2/ETNPPL/AGXT2	6
MF	GO:0015081	sodium ion transmembrane transporter activity	15/557	150/18410	5.11578e-05	0.00122944	0.000967569	SLC13A2/SLC4A11/SLC6A8/SLC23A1/SLC4A4/SCN2B/SLC34A1/SCN7A/SLC12A3/SLC5A12/SLC13A3/SLC5A10/SLC1A1/SLC13A1/SLC5A9	15
MF	GO:0005452	solute:inorganic anion antiporter activity	5/557	15/18410	5.81307e-05	0.00129931	0.00102256	SLC4A11/SLC4A4/SLC22A6/SLC22A8/SLC22A11	5
MF	GO:0016805	dipeptidase activity	5/557	15/18410	5.81307e-05	0.00129931	0.00102256	PEPD/FOLH1B/CNDP1/DPEP1/FOLH1	5
MF	GO:0008238	exopeptidase activity	12/557	102/18410	5.92974e-05	0.00129931	0.00102256	GGH/CPZ/PEPD/XPNPEP2/MMP16/FOLH1B/ANPEP/CPXM1/ACE2/CNDP1/DPEP1/FOLH1	12
MF	GO:0016769	transferase activity, transferring nitrogenous groups	6/557	24/18410	6.31156e-05	0.00134346	0.00105731	GOT1/PSAT1/ABAT/GFPT2/ETNPPL/AGXT2	6
MF	GO:0004497	monooxygenase activity	12/557	103/18410	6.53062e-05	0.00135147	0.00106361	FMO5/TYRP1/CYP4A11/CYP17A1/MIOX/MOXD1/CH25H/CYP27B1/FMO4/CYP4F3/CYP4F2/CYP2B6	12
MF	GO:0048018	receptor ligand activity	31/557	489/18410	9.26703e-05	0.00186593	0.00146849	SST/AGT/WNT2B/PNOC/CXCL1/TGFB2/CXCL2/TNFSF13B/IL6/BMP7/NAMPT/PTN/ANGPTL3/FLRT2/CXCL8/EGF/CXCL3/NRG1/IGF1/IL33/OGN/AREG/CCL14/CCL15/FGF1/BMP2/INHBB/TDGF1/TSLP/SFRP2/CCL2	31
MF	GO:0005125	cytokine activity	19/557	235/18410	0.000102727	0.00201399	0.00158502	WNT2B/CXCL1/TGFB2/CXCL2/TNFSF13B/IL6/BMP7/NAMPT/CXCL8/CXCL3/NRG1/IL33/AREG/CCL14/CCL15/BMP2/INHBB/TSLP/CCL2	19
MF	GO:0005324	long-chain fatty acid transporter activity	5/557	17/18410	0.000113915	0.00217607	0.00171257	FABP1/FABP4/CD36/SLC27A2/FABP5	5
MF	GO:0046873	metal ion transmembrane transporter activity	28/557	428/18410	0.000118644	0.00217774	0.00171389	SLC25A37/SLC39A4/KCNJ3/SLC13A2/SLC39A5/SLC4A11/SLC6A8/SLC12A6/SLC23A1/KCNJ2/SLC4A4/SCN2B/TMEM37/SLC34A1/SCN7A/SLC12A3/SLC5A12/SLC13A3/TRPM3/KCNJ10/KCNE1/SLC5A10/KCNMB2/KCNJ15/SLC1A1/SLC13A1/SLC5A9/AQP1	28
MF	GO:0030546	signaling receptor activator activity	31/557	496/18410	0.000119849	0.00217774	0.00171389	SST/AGT/WNT2B/PNOC/CXCL1/TGFB2/CXCL2/TNFSF13B/IL6/BMP7/NAMPT/PTN/ANGPTL3/FLRT2/CXCL8/EGF/CXCL3/NRG1/IGF1/IL33/OGN/AREG/CCL14/CCL15/FGF1/BMP2/INHBB/TDGF1/TSLP/SFRP2/CCL2	31
MF	GO:0016616	oxidoreductase activity, acting on the CH-OH group of donors, NAD or NADP as acceptor	13/557	128/18410	0.000136616	0.0024233	0.00190714	IDH2/HADH/DHRS2/ADH6/DCXR/DHDH/MIOX/GPD1/SORD/EHHADH/AKR7A3/CRYL1/RDH12	13
MF	GO:1901682	sulfur compound transmembrane transporter activity	8/557	52/18410	0.000155455	0.00269334	0.00211966	SLC7A11/SLC26A9/ABCC2/SLC13A3/ABCC6/SLC1A1/SLC13A1/SLC44A4	8
MF	GO:0004181	metallocarboxypeptidase activity	6/557	29/18410	0.000195871	0.00324275	0.00255205	CPZ/PEPD/FOLH1B/CPXM1/ACE2/FOLH1	6
MF	GO:0016645	oxidoreductase activity, acting on the CH-NH group of donors	6/557	29/18410	0.000195871	0.00324275	0.00255205	PRODH2/ALDH1L1/ALDH1L2/DMGDH/PIPOX/ALDH4A1	6
MF	GO:0005518	collagen binding	9/557	68/18410	0.000200241	0.00324304	0.00255228	DDR2/VWF/DCN/NID2/COCH/ANTXR1/PCOLCE2/PCOLCE/LUM	9
MF	GO:0015171	amino acid transmembrane transporter activity	10/557	84/18410	0.000219326	0.00347655	0.00273605	SLC7A13/SLC7A11/SLC7A8/SLC7A7/SLC47A1/SLC6A19/SFXN2/SLC1A1/SLC9A3R1/SLC22A4	10
MF	GO:0030170	pyridoxal phosphate binding	8/557	55/18410	0.000232314	0.00360571	0.0028377	GOT1/PSAT1/ABAT/GAD1/ETNPPL/ALB/KYNU/AGXT2	8
MF	GO:0070279	vitamin B6 binding	8/557	56/18410	0.000263957	0.0039445	0.00310432	GOT1/PSAT1/ABAT/GAD1/ETNPPL/ALB/KYNU/AGXT2	8
MF	GO:0016408	C-acyltransferase activity	5/557	20/18410	0.000264731	0.0039445	0.00310432	ACAT1/ACAA2/ACSM2B/ACSM3/ACSM2A	5
MF	GO:0001968	fibronectin binding	6/557	31/18410	0.000288408	0.004132	0.00325189	IGFBP5/LPA/CCDC80/IGFBP3/IGFBP6/SFRP2	6
MF	GO:0090482	vitamin transmembrane transporter activity	6/557	31/18410	0.000288408	0.004132	0.00325189	SLC2A14/SLC23A1/SLC2A3/SLC2A2/RBP4/SLC44A4	6
MF	GO:0004180	carboxypeptidase activity	7/557	44/18410	0.000323912	0.0045531	0.0035833	CPZ/PEPD/FOLH1B/CPXM1/ACE2/CNDP1/FOLH1	7
MF	GO:0015297	antiporter activity	10/557	89/18410	0.00035305	0.00487078	0.00383331	SLC7A11/SLC22A7/SLC4A11/SLC22A18/SLC26A9/SLC22A6/SLC47A1/SLC22A8/CLCN5/SLC22A4	10
MF	GO:0015645	fatty acid ligase activity	5/557	22/18410	0.000427701	0.00571303	0.00449616	ACSL1/ACSM2B/ACSM3/ACSM2A/SLC27A2	5
MF	GO:0016903	oxidoreductase activity, acting on the aldehyde or oxo group of donors	7/557	46/18410	0.000429436	0.00571303	0.00449616	FMO5/ALDH6A1/DHTKD1/ALDH1L1/ALDH1L2/ALDH1A2/ALDH4A1	7
MF	GO:0031994	insulin-like growth factor I binding	4/557	13/18410	0.000476709	0.00623067	0.00490355	IGFBP5/IGFBP3/IGFBP6/IGFBP1	4
MF	GO:0038024	cargo receptor activity	9/557	79/18410	0.00062351	0.00789066	0.00620996	TMPRSS2/DAB2/CUBN/ACKR4/LDLR/ILDR1/CD36/SCARA5/SCARA3	9
MF	GO:0008009	chemokine activity	7/557	49/18410	0.000637389	0.00789066	0.00620996	CXCL1/CXCL2/CXCL8/CXCL3/CCL14/CCL15/CCL2	7
MF	GO:0008237	metallopeptidase activity	15/557	189/18410	0.000651077	0.00789066	0.00620996	ADAMTS18/KLK7/CPZ/MMP28/PEPD/XPNPEP2/MMP16/FOLH1B/ADAMTS3/ANPEP/CPXM1/ACE2/CNDP1/DPEP1/FOLH1	15
MF	GO:0008242	omega peptidase activity	4/557	14/18410	0.000651497	0.00789066	0.00620996	GGT6/GGH/GGT1/GGTLC1	4
MF	GO:0140323	solute:anion antiporter activity	5/557	24/18410	0.000656672	0.00789066	0.00620996	SLC22A7/SLC4A11/SLC26A9/SLC22A6/SLC22A8	5
MF	GO:0004029	aldehyde dehydrogenase (NAD+) activity	4/557	15/18410	0.000867266	0.0102558	0.0080713	ALDH1L1/ALDH1L2/ALDH1A2/ALDH4A1	4
MF	GO:0005501	retinoid binding	6/557	38/18410	0.000903981	0.010361	0.00815413	PTGDS/SERPINA5/UGT1A1/ALDH1A2/RBP4/FABP5	6
MF	GO:0019840	isoprenoid binding	6/557	38/18410	0.000903981	0.010361	0.00815413	PTGDS/SERPINA5/UGT1A1/ALDH1A2/RBP4/FABP5	6
MF	GO:0016705	oxidoreductase activity, acting on paired donors, with incorporation or reduction of molecular oxygen	14/557	177/18410	0.00100683	0.0113649	0.00894422	PHYH/FMO5/PTGS2/TYRP1/CYP4A11/SCD5/CYP17A1/MOXD1/CH25H/CYP27B1/FMO4/CYP4F3/CYP4F2/CYP2B6	14
MF	GO:0004030	aldehyde dehydrogenase [NAD(P)+] activity	4/557	16/18410	0.00112887	0.0121885	0.00959238	ALDH1L1/ALDH1L2/ALDH1A2/ALDH4A1	4
MF	GO:0005402	carbohydrate:cation symporter activity	4/557	16/18410	0.00112887	0.0121885	0.00959238	SLC23A1/SLC5A10/SLC5A9/SLC2A9	4
MF	GO:0015347	sodium-independent organic anion transmembrane transporter activity	4/557	16/18410	0.00112887	0.0121885	0.00959238	SLC22A7/SLC22A6/SLC22A11/SLCO4C1	4
MF	GO:0016405	CoA-ligase activity	5/557	27/18410	0.00115734	0.0123174	0.0096938	ACSL1/ACSM2B/ACSM3/ACSM2A/SLC27A2	5
MF	GO:0043177	organic acid binding	12/557	141/18410	0.00120831	0.0126787	0.00997818	FABP3/PHYH/VDR/FABP1/PC/PCCA/SERPINA5/TM4SF5/SLC1A1/FTCD/UGT1A1/FABP5	12
MF	GO:0016709	oxidoreductase activity, acting on paired donors, with incorporation or reduction of molecular oxygen, NAD(P)H as one donor, and incorporation of one atom of oxygen	6/557	43/18410	0.00175727	0.0181828	0.0143099	FMO5/CH25H/CYP27B1/FMO4/CYP4F2/CYP2B6	6
MF	GO:0034185	apolipoprotein binding	4/557	18/18410	0.00180898	0.018212	0.0143329	MTTP/LPA/PLG/MAPT	4
MF	GO:0045236	CXCR chemokine receptor binding	4/557	18/18410	0.00180898	0.018212	0.0143329	CXCL1/CXCL2/CXCL8/CXCL3	4
MF	GO:0005310	dicarboxylic acid transmembrane transporter activity	5/557	30/18410	0.00189602	0.018586	0.0146272	SLC13A2/SLC26A9/ABCC2/SLC13A3/SLC1A1	5
MF	GO:0005343	organic acid:sodium symporter activity	5/557	30/18410	0.00189602	0.018586	0.0146272	SLC13A2/SLC23A1/SLC5A12/SLC13A3/SLC1A1	5
MF	GO:0008028	monocarboxylic acid transmembrane transporter activity	7/557	59/18410	0.00195252	0.0188913	0.0148675	MPC2/SLC16A4/SLC5A12/SLC16A9/CD36/SLC27A2/SLC9A3R1	7
MF	GO:0016878	acid-thiol ligase activity	5/557	31/18410	0.00220517	0.0210622	0.016576	ACSL1/ACSM2B/ACSM3/ACSM2A/SLC27A2	5
MF	GO:0016835	carbon-oxygen lyase activity	8/557	79/18410	0.0026459	0.0249519	0.0196372	ECHDC3/ENOSF1/ECHS1/EHHADH/ETNPPL/CA12/CA10/CA4	8
MF	GO:0033218	amide binding	23/557	402/18410	0.00275744	0.0256191	0.0201623	NQO2/ACOT7/TGFB2/GPR37/PANK1/ALDH6A1/SLC7A8/SRD5A1/PC/PRLR/LDLR/PCCA/ANPEP/HLA-DQB1/PIK3R1/PTH1R/CLU/CRHBP/FTCD/PNPLA3/APOE/CD36/FOLH1	23
MF	GO:0004300	enoyl-CoA hydratase activity	3/557	10/18410	0.00281983	0.0256191	0.0201623	ECHDC3/ECHS1/EHHADH	3
MF	GO:0016812	hydrolase activity, acting on carbon-nitrogen (but not peptide) bonds, in cyclic amides	3/557	10/18410	0.00281983	0.0256191	0.0201623	AMDHD1/DPEP1/DPYS	3
MF	GO:0016836	hydro-lyase activity	7/557	64/18410	0.00312414	0.028042	0.0220691	ECHDC3/ENOSF1/ECHS1/EHHADH/CA12/CA10/CA4	7
MF	GO:0008391	arachidonic acid monooxygenase activity	4/557	21/18410	0.00329283	0.0290411	0.0228553	CYP4A11/CYP4F3/CYP4F2/CYP2B6	4
MF	GO:0005319	lipid transporter activity	12/557	159/18410	0.00331863	0.0290411	0.0228553	ABCG1/MTTP/APOM/OSBPL3/FABP1/GRAMD1B/FABP4/RBP4/APOE/CD36/SLC27A2/FABP5	12
MF	GO:0016831	carboxy-lyase activity	5/557	34/18410	0.00335239	0.0290411	0.0228553	FAHD1/GOT1/PCK2/GAD1/ACMSD	5
MF	GO:0008519	ammonium transmembrane transporter activity	3/557	11/18410	0.00379067	0.0320915	0.025256	SLC12A6/RHCG/AQP1	3
MF	GO:0055056	D-glucose transmembrane transporter activity	3/557	11/18410	0.00379067	0.0320915	0.025256	SLC2A14/SLC2A3/SLC2A2	3
MF	GO:0030021	extracellular matrix structural constituent conferring compression resistance	4/557	22/18410	0.00392952	0.0321702	0.025318	DCN/OGN/ENAM/LUM	4
MF	GO:0072349	modified amino acid transmembrane transporter activity	4/557	22/18410	0.00392952	0.0321702	0.025318	SLC7A11/SLC6A8/SLC13A3/SLC22A4	4
MF	GO:0120020	cholesterol transfer activity	4/557	22/18410	0.00392952	0.0321702	0.025318	ABCG1/MTTP/GRAMD1B/APOE	4
MF	GO:0051287	NAD binding	6/557	51/18410	0.00423657	0.034307	0.0269996	IDH2/HADH/GPD1/SORD/EHHADH/CRYL1	6
MF	GO:0015248	sterol transporter activity	5/557	36/18410	0.00432261	0.0346274	0.0272518	ABCG1/MTTP/OSBPL3/GRAMD1B/APOE	5
MF	GO:0120015	sterol transfer activity	4/557	23/18410	0.00464457	0.0368107	0.0289701	ABCG1/MTTP/GRAMD1B/APOE	4
MF	GO:0050750	low-density lipoprotein particle receptor binding	4/557	24/18410	0.00544215	0.0425101	0.0334555	SYT1/DAB2/CLU/APOE	4
MF	GO:0016620	oxidoreductase activity, acting on the aldehyde or oxo group of donors, NAD or NADP as acceptor	5/557	38/18410	0.00547781	0.0425101	0.0334555	ALDH6A1/ALDH1L1/ALDH1L2/ALDH1A2/ALDH4A1	5
MF	GO:0042379	chemokine receptor binding	7/557	71/18410	0.00558375	0.0428855	0.0337509	CXCL1/CXCL2/CXCL8/CXCL3/CCL14/CCL15/CCL2	7
MF	GO:0016840	carbon-nitrogen lyase activity	3/557	13/18410	0.00628098	0.0462065	0.0363646	GGACT/ASL/FTCD	3
MF	GO:0039706	co-receptor binding	3/557	13/18410	0.00628098	0.0462065	0.0363646	BMP2/DKK2/DKK3	3
MF	GO:0016289	CoA hydrolase activity	4/557	25/18410	0.00632626	0.0462065	0.0363646	ACOT7/HIBCH/ACOT4/ACAA2	4
MF	GO:0016701	oxidoreductase activity, acting on single donors with incorporation of molecular oxygen	4/557	25/18410	0.00632626	0.0462065	0.0363646	PTGS2/MIOX/HPD/HGD	4
MF	GO:0120227	acyl-CoA binding	4/557	25/18410	0.00632626	0.0462065	0.0363646	ACOT7/PANK1/ALDH6A1/PNPLA3	4
MF	GO:0015175	neutral amino acid transmembrane transporter activity	5/557	41/18410	0.0075953	0.0544086	0.0428196	SLC7A11/SLC7A8/SLC6A19/SFXN2/SLC1A1	5
MF	GO:0016877	ligase activity, forming carbon-sulfur bonds	5/557	41/18410	0.0075953	0.0544086	0.0428196	ACSL1/ACSM2B/ACSM3/ACSM2A/SLC27A2	5
MF	GO:0004089	carbonate dehydratase activity	3/557	14/18410	0.00781629	0.0554584	0.0436458	CA12/CA10/CA4	3
MF	GO:0005242	inward rectifier potassium channel activity	4/557	27/18410	0.00836912	0.0582709	0.0458593	KCNJ3/KCNJ2/KCNJ10/KCNJ15	4
MF	GO:0070006	metalloaminopeptidase activity	4/557	27/18410	0.00836912	0.0582709	0.0458593	PEPD/XPNPEP2/MMP16/ANPEP	4
MF	GO:0099106	ion channel regulator activity	10/557	138/18410	0.00927216	0.0639608	0.0503372	BSND/SCN2B/SGK2/KCNE1/WNK4/KCNMB2/HPCAL4/PRSS8/NEDD4L/SLC9A3R1	10
MF	GO:0086008	voltage-gated potassium channel activity involved in cardiac muscle cell action potential repolarization	3/557	15/18410	0.00955354	0.0647036	0.0509218	KCNJ3/KCNJ2/KCNE1	3
MF	GO:0102991	myristoyl-CoA hydrolase activity	3/557	15/18410	0.00955354	0.0647036	0.0509218	ACOT7/ACOT4/ACAA2	3
MF	GO:0015179	L-amino acid transmembrane transporter activity	6/557	61/18410	0.0101474	0.0681063	0.0535997	SLC7A13/SLC7A11/SLC7A8/SLC7A7/SLC47A1/SLC1A1	6
MF	GO:0015108	chloride transmembrane transporter activity	8/557	99/18410	0.0103059	0.0685526	0.053951	BSND/SLC12A6/SLC26A9/SLC12A3/CLCNKB/CLCN5/SLC1A1/GABRB3	8
MF	GO:0061134	peptidase regulator activity	14/557	230/18410	0.0105261	0.0693978	0.0546162	AGT/CARD16/VIL1/LPA/KNG1/SERPINA6/TFPI2/HRG/SERPINA5/SLPI/DPEP1/PCOLCE2/PCOLCE/SFRP2	14
MF	GO:0005520	insulin-like growth factor binding	4/557	29/18410	0.0108013	0.0699739	0.0550695	IGFBP5/IGFBP3/IGFBP6/IGFBP1	4
MF	GO:0070325	lipoprotein particle receptor binding	4/557	29/18410	0.0108013	0.0699739	0.0550695	SYT1/DAB2/CLU/APOE	4
MF	GO:0016790	thiolester hydrolase activity	5/557	45/18410	0.0112233	0.0719814	0.0566494	ACOT7/HIBCH/ABHD17C/ACOT4/ACAA2	5
MF	GO:0005372	water transmembrane transporter activity	3/557	16/18410	0.0114977	0.0719814	0.0566494	SLC4A11/AQP11/AQP1	3
MF	GO:0015556	C4-dicarboxylate transmembrane transporter activity	3/557	16/18410	0.0114977	0.0719814	0.0566494	SLC13A2/SLC13A3/SLC1A1	3
MF	GO:0070403	NAD+ binding	3/557	16/18410	0.0114977	0.0719814	0.0566494	HADH/EHHADH/CRYL1	3
MF	GO:0016247	channel regulator activity	10/557	143/18410	0.0117344	0.0728511	0.0573339	BSND/SCN2B/SGK2/KCNE1/WNK4/KCNMB2/HPCAL4/PRSS8/NEDD4L/SLC9A3R1	10
MF	GO:0017147	Wnt-protein binding	4/557	30/18410	0.0121714	0.0749396	0.0589775	SFRP4/WIF1/PTPRO/SFRP2	4
MF	GO:0005044	scavenger receptor activity	5/557	47/18410	0.0134168	0.0800885	0.0630297	TMPRSS2/ACKR4/CD36/SCARA5/SCARA3	5
MF	GO:0071813	lipoprotein particle binding	4/557	31/18410	0.0136479	0.0800885	0.0630297	LDLR/APOE/CD36/MAPT	4
MF	GO:0071814	protein-lipid complex binding	4/557	31/18410	0.0136479	0.0800885	0.0630297	LDLR/APOE/CD36/MAPT	4
MF	GO:0008392	arachidonic acid epoxygenase activity	3/557	17/18410	0.0136527	0.0800885	0.0630297	CYP4A11/CYP4F2/CYP2B6	3
MF	GO:0016290	palmitoyl-CoA hydrolase activity	3/557	17/18410	0.0136527	0.0800885	0.0630297	ACOT7/ACOT4/ACAA2	3
MF	GO:0017081	chloride channel regulator activity	3/557	17/18410	0.0136527	0.0800885	0.0630297	BSND/WNK4/SLC9A3R1	3
MF	GO:0050660	flavin adenine dinucleotide binding	7/557	85/18410	0.0144755	0.084252	0.0663064	NQO2/FMO5/DAO/FMO4/PRODH2/CHDH/ACADSB	7
MF	GO:0061135	endopeptidase regulator activity	12/557	194/18410	0.0152471	0.088031	0.0692805	AGT/CARD16/VIL1/LPA/KNG1/SERPINA6/TFPI2/HRG/SERPINA5/SLPI/DPEP1/SFRP2	12
MF	GO:0008013	beta-catenin binding	7/557	86/18410	0.0153611	0.088031	0.0692805	CDHR5/KLF4/SALL1/NR4A2/TCF4/SOX17/SLC9A3R1	7
MF	GO:0030228	lipoprotein particle receptor activity	3/557	18/18410	0.0160214	0.0904239	0.0711637	LDLR/ILDR1/CD36	3
MF	GO:0043395	heparan sulfate proteoglycan binding	3/557	18/18410	0.0160214	0.0904239	0.0711637	HRG/CFH/APOE	3
MF	GO:0005506	iron ion binding	10/557	151/18410	0.0166609	0.0933263	0.0734479	PHYH/CYP4A11/SCD5/CYP17A1/MIOX/CH25H/CYP27B1/CYP4F3/CYP4F2/CYP2B6	10
MF	GO:0016646	oxidoreductase activity, acting on the CH-NH group of donors, NAD or NADP as acceptor	3/557	19/18410	0.018606	0.103444	0.0814103	ALDH1L1/ALDH1L2/ALDH4A1	3
MF	GO:0004879	nuclear receptor activity	5/557	52/18410	0.0201176	0.109399	0.0860968	VDR/NR4A2/ESRRG/HNF4G/HNF4A	5
MF	GO:0098531	ligand-activated transcription factor activity	5/557	52/18410	0.0201176	0.109399	0.0860968	VDR/NR4A2/ESRRG/HNF4G/HNF4A	5
MF	GO:1901618	organic hydroxy compound transmembrane transporter activity	5/557	52/18410	0.0201176	0.109399	0.0860968	ABCG1/SLC5A12/AQP11/RBP4/AQP1	5
MF	GO:0005178	integrin binding	10/557	156/18410	0.020432	0.110303	0.0868086	ICAM1/GFRA1/PTN/VWF/ANGPTL3/JAM2/NRG1/IGF1/FGF1/SFRP2	10
MF	GO:0015298	solute:cation antiporter activity	4/557	35/18410	0.0206664	0.110766	0.087173	SLC22A18/SLC47A1/CLCN5/SLC22A4	4
MF	GO:0004866	endopeptidase inhibitor activity	11/557	180/18410	0.0212923	0.113111	0.0890185	AGT/CARD16/VIL1/LPA/KNG1/SERPINA6/TFPI2/HRG/SERPINA5/SLPI/DPEP1	11
MF	GO:0001972	retinoic acid binding	3/557	20/18410	0.0214076	0.113111	0.0890185	SERPINA5/UGT1A1/FABP5	3
MF	GO:0043394	proteoglycan binding	4/557	36/18410	0.0227094	0.119144	0.0937667	TNC/HRG/CFH/APOE	4
MF	GO:0015459	potassium channel regulator activity	5/557	54/18410	0.0233158	0.121471	0.0955975	SGK2/KCNE1/WNK4/KCNMB2/NEDD4L	5
MF	GO:0015296	anion:cation symporter activity	3/557	21/18410	0.0244267	0.126374	0.0994567	SLC12A6/SLC12A3/SLC13A1	3
MF	GO:0004869	cysteine-type endopeptidase inhibitor activity	5/557	56/18410	0.0268253	0.137826	0.108469	CARD16/VIL1/KNG1/HRG/DPEP1	5
MF	GO:0030414	peptidase inhibitor activity	11/557	187/18410	0.0272385	0.138316	0.108854	AGT/CARD16/VIL1/LPA/KNG1/SERPINA6/TFPI2/HRG/SERPINA5/SLPI/DPEP1	11
MF	GO:0000062	fatty-acyl-CoA binding	3/557	22/18410	0.0276631	0.138316	0.108854	ACOT7/ALDH6A1/PNPLA3	3
MF	GO:0005158	insulin receptor binding	3/557	22/18410	0.0276631	0.138316	0.108854	CCDC88A/IGF1/PIK3R1	3
MF	GO:0015106	bicarbonate transmembrane transporter activity	3/557	22/18410	0.0276631	0.138316	0.108854	SLC4A11/SLC4A4/SLC26A9	3
MF	GO:0140272	exogenous protein binding	6/557	77/18410	0.0290373	0.144219	0.1135	CLDN1/ICAM1/LDLR/ANPEP/ACE2/ALB	6
MF	GO:0004177	aminopeptidase activity	4/557	39/18410	0.0295551	0.145818	0.114759	PEPD/XPNPEP2/MMP16/ANPEP	4
MF	GO:0015299	solute:proton antiporter activity	3/557	23/18410	0.0311159	0.149557	0.117702	SLC22A18/SLC47A1/CLCN5	3
MF	GO:0019211	phosphatase activator activity	3/557	23/18410	0.0311159	0.149557	0.117702	PPP1R15A/IGFBP3/BMP2	3
MF	GO:0047617	acyl-CoA hydrolase activity	3/557	23/18410	0.0311159	0.149557	0.117702	ACOT7/ACOT4/ACAA2	3
MF	GO:1901567	fatty acid derivative binding	3/557	23/18410	0.0311159	0.149557	0.117702	ACOT7/ALDH6A1/PNPLA3	3
MF	GO:0005496	steroid binding	7/557	100/18410	0.0320681	0.151261	0.119043	ABCG1/VDR/OSBPL3/SERPINA6/GRAMD1B/ESRRG/UGT1A1	7
MF	GO:0016712	oxidoreductase activity, acting on paired donors, with incorporation or reduction of molecular oxygen, reduced flavin or flavoprotein as one donor, and incorporation of one atom of oxygen	4/557	40/18410	0.0320795	0.151261	0.119043	CYP4A11/CYP4F3/CYP4F2/CYP2B6	4
MF	GO:0017080	sodium channel regulator activity	4/557	40/18410	0.0320795	0.151261	0.119043	SCN2B/SGK2/PRSS8/NEDD4L	4
MF	GO:0016702	oxidoreductase activity, acting on single donors with incorporation of molecular oxygen, incorporation of two atoms of oxygen	3/557	24/18410	0.0347836	0.156656	0.123288	PTGS2/HPD/HGD	3
MF	GO:0019865	immunoglobulin binding	3/557	24/18410	0.0347836	0.156656	0.123288	VWF/UMOD/HRG	3
MF	GO:0070003	threonine-type peptidase activity	3/557	24/18410	0.0347836	0.156656	0.123288	GGT6/GGT1/GGTLC1	3
MF	GO:0015245	fatty acid transmembrane transporter activity	2/557	10/18410	0.0350064	0.156656	0.123288	CD36/SLC27A2	2
MF	GO:0015643	toxic substance binding	2/557	10/18410	0.0350064	0.156656	0.123288	ALB/EPHX2	2
MF	GO:0019203	carbohydrate phosphatase activity	2/557	10/18410	0.0350064	0.156656	0.123288	FBP1/PFKFB2	2
MF	GO:0043225	ATPase-coupled inorganic anion transmembrane transporter activity	2/557	10/18410	0.0350064	0.156656	0.123288	ABCC2/ABCC6	2
MF	GO:0050308	sugar-phosphatase activity	2/557	10/18410	0.0350064	0.156656	0.123288	FBP1/PFKFB2	2
MF	GO:0016746	acyltransferase activity	13/557	244/18410	0.0351161	0.156656	0.123288	CLYBL/GGT6/ACAT1/GLYATL1/NAT8B/ACAA2/GGT1/AGPAT3/ACSM2B/GLYAT/ACSM3/PNPLA3/ACSM2A	13
MF	GO:0046906	tetrapyrrole binding	9/557	149/18410	0.0375125	0.165848	0.130523	PTGS2/CYP4A11/CYP17A1/CUBN/HRG/CYP27B1/CYP4F3/CYP4F2/CYP2B6	9
MF	GO:0016810	hydrolase activity, acting on carbon-nitrogen (but not peptide) bonds	8/557	126/18410	0.0376924	0.165848	0.130523	GLS/ACY3/UPB1/AMDHD1/AGMAT/DPEP1/DPYS/GDA	8
MF	GO:0005126	cytokine receptor binding	14/557	272/18410	0.0378445	0.165848	0.130523	CXCL1/TGFB2/CXCL2/TNFSF13B/IL6/CXCL8/CXCL3/CCDC88A/PRLR/PIK3R1/CCL14/CCL15/TSLP/CCL2	14
MF	GO:0015101	organic cation transmembrane transporter activity	3/557	25/18410	0.0386641	0.166502	0.131037	SLC7A8/SLC44A4/SLC22A4	3
MF	GO:0070330	aromatase activity	3/557	25/18410	0.0386641	0.166502	0.131037	CYP4A11/CYP4F3/CYP4F2	3
MF	GO:0070696	transmembrane receptor protein serine/threonine kinase binding	3/557	25/18410	0.0386641	0.166502	0.131037	BMP7/BMP2/TDGF1	3
MF	GO:0005247	voltage-gated chloride channel activity	2/557	11/18410	0.0419432	0.176541	0.138938	CLCNKB/CLCN5	2
MF	GO:0032052	bile acid binding	2/557	11/18410	0.0419432	0.176541	0.138938	VDR/FABP1	2
MF	GO:0035673	oligopeptide transmembrane transporter activity	2/557	11/18410	0.0419432	0.176541	0.138938	SLC13A3/SLC15A2	2
MF	GO:0047676	arachidonate-CoA ligase activity	2/557	11/18410	0.0419432	0.176541	0.138938	ACSL1/SLC27A2	2
MF	GO:1902936	phosphatidylinositol bisphosphate binding	7/557	107/18410	0.0437811	0.182831	0.143888	VIL1/SYT1/KCNJ2/PLEKHA5/KIF16B/GSN/MAPT	7
MF	GO:0016209	antioxidant activity	6/557	85/18410	0.0439285	0.182831	0.143888	PTGS2/APOM/FABP1/GSTA1/ALB/APOE	6
MF	GO:0015079	potassium ion transmembrane transporter activity	9/557	154/18410	0.0447283	0.185125	0.145694	KCNJ3/SLC12A6/KCNJ2/SLC12A3/KCNJ10/KCNE1/KCNMB2/KCNJ15/AQP1	9
MF	GO:0001216	DNA-binding transcription activator activity	21/557	466/18410	0.0459385	0.189084	0.148809	BNC1/SATB2/PRDM16/KLF4/SIX2/NR4A2/TCF4/WT1/TFEC/SOX17/ESRRG/TFAP2B/CEBPB/MAFF/JUNB/EGR3/DMRT2/HNF4G/FOSB/HNF4A/EGR2	21
MF	GO:0005543	phospholipid binding	21/557	467/18410	0.046803	0.191584	0.150777	PLD1/VIL1/SYT1/MREG/ABCG1/APOM/KCNJ2/FABP1/CCDC88A/GRAMD1B/PLEKHA5/KIF16B/GSN/SERPINA5/PNPLA3/APOH/APOE/DPEP1/ANXA1/PON1/MAPT	21
MF	GO:0005253	anion channel activity	6/557	87/18410	0.0482775	0.195537	0.153888	BSND/SLC26A9/CLCNKB/CLCN5/SLC1A1/GABRB3	6
MF	GO:0005216	ion channel activity	20/557	442/18410	0.0488222	0.195537	0.153888	BSND/KCNJ3/SLC4A11/SLC12A6/KCNJ2/SCN2B/TMEM37/SLC26A9/SCN7A/CLCNKB/TRPM3/KCNJ10/KCNE1/CLCN5/KCNMB2/KCNJ15/SLC1A1/GABRB3/RHCG/AQP1	20
MF	GO:0008179	adenylate cyclase binding	2/557	12/18410	0.0493436	0.195537	0.153888	ADCY2/AKAP12	2
MF	GO:0015166	polyol transmembrane transporter activity	2/557	12/18410	0.0493436	0.195537	0.153888	AQP11/AQP1	2
MF	GO:0015926	glucosidase activity	2/557	12/18410	0.0493436	0.195537	0.153888	MGAM/GBA3	2
MF	GO:1902282	voltage-gated potassium channel activity involved in ventricular cardiac muscle cell action potential repolarization	2/557	12/18410	0.0493436	0.195537	0.153888	KCNJ3/KCNE1	2

## Sheet: KEGG-enrich
ID	Description	GeneRatio	BgRatio	pvalue	p.adjust	qvalue	geneID	Count
hsa00280	Valine, leucine and isoleucine degradation	13/311	48/8586	8.85986e-09	2.58708e-06	2.18232e-06	HADH/ECHS1/PCCB/HIBCH/ACAT1/ALDH6A1/ACAA2/ABAT/PCCA/EHHADH/ACADSB/AGXT2/MCCC2	13
hsa00650	Butanoate metabolism	9/311	27/8586	2.52037e-07	3.67974e-05	3.10403e-05	HADH/ECHS1/ACAT1/ABAT/EHHADH/GAD1/ACSM2B/ACSM3/ACSM2A	9
hsa00410	beta-Alanine metabolism	9/311	31/8586	9.53684e-07	9.28252e-05	7.83024e-05	ECHS1/HIBCH/ALDH6A1/UPB1/ABAT/EHHADH/GAD1/CNDP1/DPYS	9
hsa00250	Alanine, aspartate and glutamate metabolism	9/311	37/8586	4.85679e-06	0.000354545	0.000299076	GOT1/GLS/ASL/ABAT/GFPT2/GAD1/AGXT2/ALDH4A1/FOLH1	9
hsa03320	PPAR signaling pathway	11/311	75/8586	7.28037e-05	0.00425174	0.00358654	FABP3/ACSL1/GK/PCK2/SCD5/FABP1/FABP4/EHHADH/CD36/SLC27A2/FABP5	11
hsa00380	Tryptophan metabolism	8/311	42/8586	0.000108959	0.00473441	0.0039937	HADH/ECHS1/ACAT1/DHTKD1/EHHADH/KYNU/ACMSD/AOC1	8
hsa00640	Propanoate metabolism	7/311	32/8586	0.000117823	0.00473441	0.0039937	ECHS1/PCCB/HIBCH/ALDH6A1/ABAT/PCCA/EHHADH	7
hsa00071	Fatty acid degradation	8/311	43/8586	0.00012971	0.00473441	0.0039937	HADH/ACSL1/ECHS1/ADH6/ACAT1/ACAA2/EHHADH/ACADSB	8
hsa00430	Taurine and hypotaurine metabolism	5/311	16/8586	0.0001897	0.00615471	0.00519179	FMO5/GGT6/GGT1/GAD1/FMO4	5
hsa04668	TNF signaling pathway	13/311	114/8586	0.000231437	0.00670547	0.00565638	CXCL1/PTGS2/CXCL2/ICAM1/IL6/TNFAIP3/SOCS3/CXCL3/MAP3K8/PIK3R1/CEBPB/JUNB/CCL2	13
hsa01200	Carbon metabolism	13/311	115/8586	0.000252603	0.00670547	0.00565638	IDH2/ECHS1/PCCB/GOT1/HIBCH/ACAT1/HAO2/ALDH6A1/FBP1/PC/ALDOB/PSAT1/PCCA	13
hsa00330	Arginine and proline metabolism	8/311	50/8586	0.000385275	0.00865387	0.00729994	GOT1/HOGA1/DAO/PRODH2/AGMAT/CNDP1/AOC1/ALDH4A1	8
hsa05144	Malaria	8/311	50/8586	0.000385275	0.00865387	0.00729994	TGFB2/ICAM1/IL6/PECAM1/CXCL8/SDC1/CD36/CCL2	8
hsa05323	Rheumatoid arthritis	11/311	93/8586	0.000507657	0.0105883	0.00893172	CXCL1/TGFB2/CXCL2/TNFSF13B/ICAM1/IL6/CXCL8/ATP6V0D2/CXCL3/HLA-DQB1/CCL2	11
hsa04146	Peroxisome	10/311	83/8586	0.000783692	0.0152559	0.012869	IDH2/ACSL1/PHYH/HAO2/DAO/EHHADH/AMACR/PIPOX/SLC27A2/EPHX2	10
hsa01212	Fatty acid metabolism	8/311	57/8586	0.000951937	0.0173728	0.0146548	HADH/ACSL1/ECHS1/ACAT1/SCD5/ACAA2/EHHADH/ACADSB	8
hsa04610	Complement and coagulation cascades	10/311	86/8586	0.00103683	0.0178091	0.0150228	VWF/PLG/KNG1/PLAUR/FGG/SERPINA5/CLU/CFH/PROCR/C1S	10
hsa04964	Proximal tubule bicarbonate reclamation	5/311	23/8586	0.00118607	0.0188622	0.0159111	GLS/PCK2/SLC4A4/AQP1/CA4	5
hsa00051	Fructose and mannose metabolism	6/311	34/8586	0.00122733	0.0188622	0.0159111	ENOSF1/FBP1/KHK/ALDOB/SORD/PFKFB2	6
hsa04064	NF-kappa B signaling pathway	11/311	104/8586	0.00130519	0.0190558	0.0160745	BCL2A1/CXCL1/PTGS2/CXCL2/TNFSF13B/ICAM1/TNFAIP3/CXCL8/CXCL3/GADD45B/PRKCQ	11
hsa00590	Arachidonic acid metabolism	8/311	61/8586	0.0014968	0.0208127	0.0175565	PTGS2/GGT1/PTGDS/PLA2G12B/CYP4F3/CYP4F2/CYP2B6/EPHX2	8
hsa00350	Tyrosine metabolism	6/311	36/8586	0.00167268	0.022201	0.0187276	FAHD1/GOT1/TYRP1/ADH6/HPD/HGD	6
hsa04931	Insulin resistance	11/311	108/8586	0.00177613	0.0225492	0.0190213	PRKAA2/AGT/IL6/SOCS3/PCK2/GFPT2/PIK3R1/SLC2A2/PRKCQ/CD36/SLC27A2	11
hsa04657	IL-17 signaling pathway	10/311	94/8586	0.00205245	0.0249714	0.0210646	CXCL1/PTGS2/CXCL2/IL6/TNFAIP3/CXCL8/CXCL3/CEBPB/FOSB/CCL2	10
hsa00062	Fatty acid elongation	5/311	27/8586	0.00252713	0.0295169	0.0248989	ACOT7/HADH/ECHS1/ACOT4/ACAA2	5
hsa00260	Glycine, serine and threonine metabolism	6/311	40/8586	0.00291965	0.0327899	0.0276598	PSAT1/DAO/CHDH/DMGDH/AGXT2/PIPOX	6
hsa00630	Glyoxylate and dicarboxylate metabolism	5/311	30/8586	0.00408219	0.0441481	0.037241	PCCB/ACAT1/HAO2/HOGA1/PCCA	5
hsa04928	Parathyroid hormone synthesis, secretion and action	10/311	106/8586	0.00494221	0.0515402	0.0434766	PLD1/VDR/MMP16/SLC34A1/NR4A2/CYP27B1/PTH1R/ADCY2/SOST/SLC9A3R1	10
hsa00770	Pantothenate and CoA biosynthesis	4/311	21/8586	0.00620164	0.0605708	0.0510944	PANK1/UPB1/ENPP3/DPYS	4
hsa01210	2-Oxocarboxylic acid metabolism	5/311	33/8586	0.00622303	0.0605708	0.0510944	IDH2/GOT1/DHTKD1/ABHD14A-ACY1/AGXT2	5
hsa00220	Arginine biosynthesis	4/311	22/8586	0.00736729	0.0657712	0.0554811	GOT1/GLS/ASL/ABHD14A-ACY1	4
hsa00340	Histidine metabolism	4/311	22/8586	0.00736729	0.0657712	0.0554811	AMDHD1/FTCD/CNDP1/AOC1	4
hsa00310	Lysine degradation	7/311	63/8586	0.00743304	0.0657712	0.0554811	HADH/ECHS1/ACAT1/DHTKD1/PRDM16/EHHADH/PIPOX	7
hsa04068	FoxO signaling pathway	11/311	131/8586	0.00784496	0.0673743	0.0568334	PRKAA2/TGFB2/IL6/PCK2/EGF/CCND2/IGF1/SGK2/PIK3R1/GADD45B/BCL6	11
hsa04614	Renin-angiotensin system	4/311	23/8586	0.0086686	0.0723209	0.0610061	AGT/ANPEP/ACE2/KLK1	4
hsa00040	Pentose and glucuronate interconversions	5/311	36/8586	0.00905026	0.0734077	0.0619229	DCXR/DHDH/SORD/CRYL1/UGT1A1	5
hsa04913	Ovarian steroidogenesis	6/311	51/8586	0.00983094	0.075543	0.0637241	PTGS2/ACOT4/CYP17A1/IGF1/LDLR/ADCY2	6
hsa04979	Cholesterol metabolism	6/311	51/8586	0.00983094	0.075543	0.0637241	ANGPTL3/LPA/LDLR/APOH/APOE/CD36	6
hsa04061	Viral protein interaction with cytokine and cytokine receptor	9/311	100/8586	0.0101159	0.0757393	0.0638897	CXCL1/CXCL2/IL6/CXCL8/CXCL3/ACKR4/CCL14/CCL15/CCL2	9
hsa04974	Protein digestion and absorption	9/311	103/8586	0.0121526	0.0887141	0.0748345	COL26A1/XPNPEP2/SLC7A8/SLC7A7/SLC6A19/ACE2/SLC1A1/COL11A1/COL8A1	9
hsa00982	Drug metabolism - cytochrome P450	7/311	72/8586	0.0150366	0.104578	0.0882161	FMO5/ADH6/GSTM5/FMO4/GSTA1/UGT1A1/CYP2B6	7
hsa04976	Bile secretion	8/311	89/8586	0.015042	0.104578	0.0882161	SLC22A7/SLC4A4/ABCC2/LDLR/SLC22A8/UGT1A1/ADCY2/AQP1	8
hsa00480	Glutathione metabolism	6/311	57/8586	0.0165496	0.112384	0.0948009	IDH2/GGT6/GSTM5/GGT1/ANPEP/GSTA1	6
hsa04621	NOD-like receptor signaling pathway	13/311	186/8586	0.0175061	0.116177	0.0980004	CARD16/CXCL1/CXCL2/IL6/NAMPT/TNFAIP3/CXCL8/CXCL3/GBP2/IFI16/ANTXR1/CCL2/DEFA1	13
hsa01230	Biosynthesis of amino acids	7/311	75/8586	0.0184937	0.119526	0.100826	IDH2/GOT1/ASL/ABHD14A-ACY1/PC/ALDOB/PSAT1	7
hsa04975	Fat digestion and absorption	5/311	43/8586	0.0188294	0.119526	0.100826	ACAT1/MTTP/FABP1/PLA2G12B/CD36	5
hsa04060	Cytokine-cytokine receptor interaction	18/311	297/8586	0.0223739	0.134303	0.113291	CXCL1/TGFB2/CXCL2/TNFSF13B/IL6/BMP7/CXCL8/TNFRSF21/CXCL3/PRLR/ACKR4/IL33/CCL14/CCL15/BMP2/INHBB/TSLP/CCL2	18
hsa00980	Metabolism of xenobiotics by cytochrome P450	7/311	78/8586	0.0224742	0.134303	0.113291	ADH6/DHDH/GSTM5/AKR7A3/GSTA1/UGT1A1/CYP2B6	7
hsa05150	Staphylococcus aureus infection	8/311	96/8586	0.0227683	0.134303	0.113291	ICAM1/PLG/FGG/HLA-DQB1/CFH/KRT19/DEFA1/C1S	8
hsa05202	Transcriptional misregulation in cancer	13/311	193/8586	0.022997	0.134303	0.113291	BCL2A1/IL6/TMPRSS2/CXCL8/CCND2/NFKBIZ/IGF1/WT1/CEBPB/GADD45B/IGFBP3/BCL6/DEFA1	13
hsa00983	Drug metabolism - other enzymes	7/311	80/8586	0.0254353	0.145629	0.122845	UPP2/UPB1/GSTM5/GSTA1/CES2/UGT1A1/DPYS	7
hsa04933	AGE-RAGE signaling pathway in diabetic complications	8/311	100/8586	0.0282625	0.158705	0.133875	AGT/TGFB2/ICAM1/IL6/PIM1/CXCL8/PIK3R1/CCL2	8
hsa04152	AMPK signaling pathway	9/311	121/8586	0.0312661	0.172258	0.145308	PRKAA2/PCK2/FBP1/SCD5/IGF1/PIK3R1/PFKFB2/CD36/HNF4A	9
hsa00670	One carbon pool by folate	3/311	20/8586	0.0339857	0.183775	0.155023	ALDH1L1/FTCD/ALDH1L2	3
hsa04920	Adipocytokine signaling pathway	6/311	69/8586	0.0382645	0.20315	0.171366	PRKAA2/ACSL1/SOCS3/PCK2/PRKCQ/CD36	6
hsa04917	Prolactin signaling pathway	6/311	70/8586	0.0406326	0.208153	0.175587	SOCS3/CYP17A1/CCND2/PRLR/PIK3R1/SLC2A2	6
hsa05120	Epithelial cell signaling in Helicobacter pylori infection	6/311	70/8586	0.0406326	0.208153	0.175587	CXCL1/CXCL2/CXCL8/JAM2/ATP6V0D2/CXCL3	6
hsa05410	Hypertrophic cardiomyopathy	7/311	90/8586	0.0442472	0.222762	0.18791	PRKAA2/AGT/TGFB2/IL6/TNNT2/IGF1/SGCG	7
