# Supplementary material for: Acyl-CoA thioesterase 13 (ACOT13) attenuates the progression of autosomal dominant polycystic kidney disease in vitro via triggering mitochondrial-related cell apoptosis
Source: Aging (Albany NY). 2024 Aug 21;16(16):11877–92. doi: 10.18632/aging.206054 (PMC11386924; doi:10.18632/aging.206054)
Supplement: Supplementary Table 2 [file aging-16-206054-s003.xlsx]

## Sheet: Table S2
Supplementary Table 2. GSEA enrichment terms between H- and L-ACOT13 groups.
ID	Description	setSize	enrichmentScore	NES	pvalue	p.adjust	qvalue	rank	leading_edge	core_enrichment
hsa00020	Citrate cycle (TCA cycle)	30	0.884396	2.51965	0.00199601	0.00777393	0.00388515	1704	tags=90%, list=9%, signal=82%	PCK1/OGDHL/PCK2/IDH2/PC/PDHA1/ACO2/IDH1/ACO1/MDH1/DLD/FH/SUCLG1/SDHB/DLST/SUCLG2/SDHC/DLAT/PDHB/ACLY/SDHA/IDH3A/SDHD/SUCLA2/CS/MDH2/IDH3G
hsa04964	Proximal tubule bicarbonate reclamation	23	0.874242	2.3573	0.00196464	0.00777393	0.00388515	893	tags=61%, list=5%, signal=58%	PCK1/SLC4A4/CA4/GLS/PCK2/CA2/AQP1/ATP1B1/SLC25A10/MDH1/ATP1A1/GLUD1/FXYD2/GLUD2
hsa00785	Lipoic acid metabolism	18	0.868832	2.23617	0.00198807	0.00777393	0.00388515	1055	tags=67%, list=6%, signal=63%	OGDHL/DHTKD1/GLDC/PDHA1/AMT/GCSH/BCKDHB/DLD/DLST/DBT/DLAT/PDHB
hsa00053	Ascorbate and aldarate metabolism	19	0.849369	2.21349	0.00198413	0.00777393	0.00388515	1291	tags=63%, list=7%, signal=59%	MIOX/UGT1A1/UGT2A3/UGT2B28/KL/UGT1A6/AKR1A1/ALDH3A2/ALDH1B1/RGN/ALDH7A1/ALDH9A1
hsa00040	Pentose and glucuronate interconversions	22	0.84043	2.259	0.00192678	0.00777393	0.00388515	740	tags=50%, list=4%, signal=48%	UGT1A1/UGT2A3/SORD/UGT2B28/KL/DHDH/DCXR/CRYL1/UGT1A6/AKR1A1/FGGY
hsa00630	Glyoxylate and dicarboxylate metabolism	29	0.83536	2.36132	0.00196464	0.00777393	0.00388515	1730	tags=76%, list=9%, signal=69%	HAO2/HOGA1/PCCB/ACAT1/PCCA/GLDC/ACO2/ACO1/AGXT/AMT/GCSH/MDH1/GLYCTK/DLD/PGP/ACSS2/CS/SHMT1/MDH2/GRHPR/HAO1/CAT
hsa01210	2-Oxocarboxylic acid metabolism	33	0.834759	2.45643	0.00194553	0.00777393	0.00388515	1375	tags=64%, list=7%, signal=59%	AGXT2/ABHD14A-ACY1/OGDHL/GOT1/IDH2/DHTKD1/PDHA1/ACO2/IDH1/ACO1/AGXT/GPT2/BCKDHB/GOT2/DLD/DLST/DBT/DLAT/PDHB/IDH3A/CS
hsa00260	Glycine, serine and threonine metabolism	38	0.820662	2.51265	0.0019685	0.00777393	0.00388515	1789	tags=68%, list=10%, signal=62%	AGXT2/PIPOX/DMGDH/DAO/GLDC/BHMT/PSAT1/AGXT/AMT/GCSH/CHDH/GLYCTK/DLD/BPGM/ALAS1/CTH/SDSL/ALDH7A1/MAOA/GATM/GCAT/GAMT/SHMT1/GRHPR/PSPH/SRR
hsa00280	Valine, leucine and isoleucine degradation	47	0.813462	2.57691	0.00197239	0.00777393	0.00388515	2038	tags=74%, list=11%, signal=67%	AGXT2/ABAT/EHHADH/ALDH6A1/PCCB/HIBCH/ACAT1/PCCA/ECHS1/ACADSB/ACAD8/HADH/ACAA1/ACADM/BCKDHB/AUH/ALDH3A2/HIBADH/DLD/MCCC2/MCCC1/ALDH1B1/OXCT1/HMGCL/DBT/HSD17B10/ALDH7A1/ALDH9A1/HADHB/IVD/HMGCS2/ACADS/HADHA/ALDH2/AOX1
hsa00640	Propanoate metabolism	31	0.813454	2.32905	0.00201207	0.00777393	0.00388515	1917	tags=65%, list=10%, signal=58%	ABAT/EHHADH/ALDH6A1/PCCB/HIBCH/PCCA/ECHS1/ACOX1/BCKDHB/DLD/ECHDC1/SUCLG1/SUCLG2/DBT/MLYCD/ACSS2/SUCLA2/LDHB/ACADS/HADHA
hsa00650	Butanoate metabolism	25	0.80682	2.23259	0.00192308	0.00777393	0.00388515	2047	tags=72%, list=11%, signal=64%	ACSM2A/ABAT/ACSM2B/EHHADH/ACSM3/ACAT1/ECHS1/HADH/ACSM5/OXCT1/BDH1/HMGCL/L2HGDH/HMGCS2/ALDH5A1/ACADS/HADHA/GAD1
hsa00340	Histidine metabolism	21	0.804763	2.1306	0.00196464	0.00777393	0.00388515	2029	tags=57%, list=11%, signal=51%	AOC1/AMDHD1/CNDP1/FTCD/ASPA/ALDH3A2/ALDH1B1/ALDH7A1/MAOA/ALDH9A1/ALDH2/CNDP2
hsa00410	beta-Alanine metabolism	31	0.79856	2.28641	0.00201207	0.00777393	0.00388515	2047	tags=61%, list=11%, signal=55%	DPYS/ABAT/EHHADH/ALDH6A1/CNDP1/HIBCH/ECHS1/ACOX1/ALDH3A2/UPB1/ALDH1B1/ALDH7A1/MLYCD/ALDH9A1/ACADS/HADHA/ALDH2/CNDP2/GAD1
hsa04614	Renin-angiotensin system	22	0.788953	2.12063	0.00192678	0.00777393	0.00388515	1693	tags=50%, list=9%, signal=46%	ACE2/MME/REN/ANPEP/KLK1/AGT/ENPEP/CTSA/NLN/ATP6AP2/ACE
hsa00330	Arginine and proline metabolism	45	0.757741	2.37196	0.00199601	0.00777393	0.00388515	2029	tags=56%, list=11%, signal=50%	AOC1/AGMAT/HOGA1/DAO/PRODH2/GOT1/CNDP1/ALDH4A1/ALDH3A2/GOT2/CKMT1A/ALDH1B1/CKMT2/SAT2/ALDH7A1/MAOA/GATM/ARG2/SMS/ALDH9A1/GAMT/CKB/LAP3/ALDH2/CNDP2
hsa00380	Tryptophan metabolism	40	0.755938	2.34349	0.00194932	0.00777393	0.00388515	2056	tags=62%, list=11%, signal=56%	ACMSD/ALDH8A1/AOC1/EHHADH/KMO/ACAT1/DHTKD1/ECHS1/HADH/KYNU/ALDH3A2/DLD/ALDH1B1/GCDH/DLST/ALDH7A1/MAOA/ALDH9A1/DDC/CAT/TDO2/HADHA/ALDH2/AOX1/HAAO
hsa04966	Collecting duct acid secretion	27	0.754859	2.10477	0.00194932	0.00777393	0.00388515	3213	tags=74%, list=17%, signal=61%	ATP6V0A4/ATP6V0D2/CA2/CLCNKB/ATP6V1G3/ATP6V1B1/ATP6V1C2/ATP6V1A/SLC4A1/ATP6V1B2/ATP6V0D1/ATP6V0E2/ATP6V1D/ATP6V0C/ATP6V0E1/ATP6V0A1/ATP6V1C1/ATP6V1F/ATP6V1G1/ATP6V1E1
hsa00790	Folate biosynthesis	23	0.750079	2.02251	0.00196464	0.00777393	0.00388515	2981	tags=65%, list=16%, signal=55%	GGH/QDPR/ALPL/AKR1C3/CBR1/GCH1/GPHN/SPR/MOCS2/PCBD1/ALPI/PTS/DHFR/MOCS1/PCBD2
hsa00130	Ubiquinone and other terpenoid-quinone biosynthesis	11	0.729473	1.65887	0.0248566	0.0510773	0.0255267	2051	tags=55%, list=11%, signal=49%	HPD/NQO1/GGCX/COQ3/COQ6/COQ5
hsa04977	Vitamin digestion and absorption	21	0.725448	1.92061	0.00392927	0.0113216	0.00565817	2282	tags=48%, list=12%, signal=42%	CUBN/SLC23A1/FOLH1/BTD/TCN2/MMACHC/SLC19A3/SLC5A6/SLC52A3/LMBRD1
hsa04146	Peroxisome	83	0.722057	2.5085	0.00189753	0.00777393	0.00388515	2783	tags=65%, list=15%, signal=56%	SLC27A2/HAO2/PIPOX/EHHADH/DAO/AMACR/IDH2/ACSL1/EPHX2/PHYH/ACOX1/ACAA1/IDH1/AGXT/ACOX2/ECI2/PXMP2/DECR2/MPV17L/HMGCL/GSTK1/ACSL6/ABCD3/HACL1/MLYCD/PEX1/PEX7/NUDT19/NUDT7/ECH1/DDO/PEX3/NUDT12/DHRS4/CROT/SCP2/HAO1/ACSL4/CAT/AGPS/NUDT13/PEX13/HSD17B4/PRDX1/PECR/PEX5/PEX12/MPV17L2/PAOX/ACSL3/PEX11B/GNPAT/SOD1/PEX11G
hsa00430	Taurine and hypotaurine metabolism	16	0.720171	1.80245	0.011976	0.0290355	0.0145109	358	tags=31%, list=2%, signal=31%	FMO1/GGT1/GGT6/FMO4/FMO5
hsa01200	Carbon metabolism	110	0.720084	2.62903	0.0018315	0.00777393	0.00388515	1730	tags=52%, list=9%, signal=47%	HAO2/FBP1/OGDHL/ALDH6A1/GOT1/IDH2/PCCB/HIBCH/ACAT1/PCCA/GLDC/ECHS1/PC/PSAT1/ACOX1/PDHA1/ACO2/IDH1/ACO1/AGXT/GPT2/IDNK/AMT/GCSH/MDH1/GOT2/GLUD1/GLYCTK/DLD/FH/PKLR/ENO1/SUCLG1/SDHB/RGN/DLST/SUCLG2/GLUD2/SDSL/SDHC/DLAT/PDHB/PGP/PRPS2/ACSS2/SDHA/IDH3A/SDHD/SUCLA2/CS/SHMT1/MDH2/HAO1/PFKM/PSPH/IDH3G/CAT
hsa00220	Arginine biosynthesis	22	0.715892	1.92425	0.00385357	0.0113216	0.00565817	1231	tags=45%, list=7%, signal=43%	ABHD14A-ACY1/GLS/GOT1/ASL/GPT2/GOT2/GLUD1/ASS1/GLUD2/ARG2
hsa00071	Fatty acid degradation	42	0.708167	2.21003	0.00194932	0.00777393	0.00388515	1946	tags=62%, list=10%, signal=56%	ADH6/EHHADH/ACAT1/ECHS1/ACSL1/ACADSB/ACOX1/HADH/ACAA1/ACADM/ECI2/ALDH3A2/CPT2/ALDH1B1/GCDH/ACSL6/ALDH7A1/ALDH9A1/ACSBG2/HADHB/CPT1A/ACADVL/ACSL4/ACADS/HADHA/ALDH2
hsa00620	Pyruvate metabolism	47	0.705493	2.23488	0.00197239	0.00777393	0.00388515	1559	tags=51%, list=8%, signal=47%	PCK1/ADH6/PCK2/ACAT1/PC/PDHA1/AKR1A1/HAGH/LDHD/MDH1/ALDH3A2/DLD/FH/PKLR/ALDH1B1/ALDH7A1/DLAT/PDHB/ACSS2/ALDH9A1/MDH2/ACOT12/GRHPR/LDHB
hsa01212	Fatty acid metabolism	50	0.704247	2.2383	0.00198807	0.00777393	0.00388515	2902	tags=66%, list=15%, signal=56%	EHHADH/SCD5/ACAT1/ECHS1/ACSL1/ACADSB/ACOX1/HADH/ACAA1/ACADM/CPT2/ACSL6/CBR4/OXSM/ACSBG2/HADHB/MCAT/CPT1A/SCP2/ACADVL/ACSL4/TECR/ACADS/HSD17B8/HADHA/ELOVL7/HSD17B4/ELOVL1/ACSL3/MECR/ACADL/ACACA/ACAA2
hsa00250	Alanine, aspartate and glutamate metabolism	35	0.701198	2.09209	0.00197239	0.00777393	0.00388515	1545	tags=51%, list=8%, signal=47%	AGXT2/ABAT/GLS/GOT1/ALDH4A1/ASL/ASPA/AGXT/NIT2/GPT2/GOT2/GLUD1/ASRGL1/ASS1/GLUD2/FOLH1/DDO/ALDH5A1
hsa00190	Oxidative phosphorylation	111	0.689739	2.52142	0.00182482	0.00777393	0.00388515	3213	tags=67%, list=17%, signal=56%	ATP6V0A4/ATP6V0D2/ATP6V1G3/ATP6V1B1/ATP6V1C2/COX11/ATP6V1A/NDUFS1/ATP6V1B2/UQCRC1/ATP6V0D1/NDUFA9/SDHB/NDUFS2/ATP6V1H/COX6A1/ATP6V0E2/UQCRFS1/CYCS/SDHC/NDUFV2/PPA2/ATP6V0B/COX5A/NDUFV3/CYC1/ATP6V1D/UQCR10/UQCRQ/SDHA/SDHD/NDUFB9/COX3/NDUFS3/NDUFS7/COX5B/COX7B/COX8A/LHPP/COX10/NDUFA7/NDUFA3/NDUFA2/UQCRH/ATP12A/NDUFB5/NDUFB10/NDUFA6/NDUFA8/ND2/NDUFAB1/ATP6V0C/NDUFV1/ATP6V0E1/NDUFB11/NDUFA12/NDUFB2/C…
hsa00360	Phenylalanine metabolism	15	0.689318	1.71733	0.015625	0.0357882	0.0178857	1709	tags=33%, list=9%, signal=30%	HPD/GOT1/GOT2/MAOA/DDC
hsa00770	Pantothenate and CoA biosynthesis	21	0.684217	1.81145	0.0157171	0.0357882	0.0178857	1946	tags=48%, list=10%, signal=43%	DPYS/PANK1/ENPP3/VNN1/ALDH3A2/UPB1/ALDH1B1/AASDHPPT/COASY/ALDH2
hsa00061	Fatty acid biosynthesis	17	0.680376	1.74308	0.015444	0.0357882	0.0178857	2727	tags=65%, list=15%, signal=55%	ACSL1/ACSL6/CBR4/OXSM/ACSBG2/MCAT/ACSL4/HSD17B8/ACSL3/MECR/ACACA
hsa00270	Cysteine and methionine metabolism	49	0.677591	2.15585	0.00197628	0.00777393	0.00388515	2503	tags=45%, list=13%, signal=39%	AGXT2/BHMT2/GOT1/BHMT/PSAT1/TST/MDH1/GOT2/GCLC/CTH/AHCY/ADI1/SDSL/AHCYL2/SMS/MDH2/LDHB/MAT2A/GCLM/AMD1/APIP/GSS
hsa00062	Fatty acid elongation	21	0.670909	1.77622	0.0157171	0.0357882	0.0178857	3144	tags=62%, list=17%, signal=52%	ACOT7/ECHS1/ACOT4/HADH/ACOT1/HADHB/TECR/HADHA/ELOVL7/ELOVL1/MECR/ACAA2/HSD17B12
hsa01040	Biosynthesis of unsaturated fatty acids	22	0.646327	1.73727	0.0154143	0.0357882	0.0178857	2189	tags=50%, list=12%, signal=44%	SCD5/ACOT7/ACOT4/ACOX1/ACAA1/ACOT1/SCP2/TECR/ELOVL7/HSD17B4/ELOVL1
hsa04976	Bile secretion	78	0.642195	2.20428	0.00189753	0.00777393	0.00388515	2016	tags=36%, list=11%, signal=32%	SLC22A8/UGT1A1/SLC4A4/UGT2A3/SLC10A2/UGT2B28/CA2/AQP1/ABCC2/ATP1B1/KCNN2/NR1H4/SLC51A/ABCB1/UGT1A6/ATP1A1/CYP3A4/FXYD2/AQP4/SLC51B/ADCY9/ABCC3/SLC5A1/NCEH1/PRKACB/ABCC4/ATP1B2/SLC22A7
hsa00350	Tyrosine metabolism	36	0.635586	1.90742	0.00198413	0.00777393	0.00388515	2038	tags=33%, list=11%, signal=30%	HPD/TYRP1/HGD/ADH6/GOT1/FAHD1/GOT2/FAH/MAOA/GSTZ1/DDC/AOX1
hsa00983	Drug metabolism - other enzymes	64	0.627652	2.07935	0.00192678	0.00777393	0.00388515	1347	tags=28%, list=7%, signal=26%	GSTA1/DPYS/UGT1A1/UPP2/UGT2A3/UGT2B28/GSTA3/MGST1/CYP2E1/CES2/UGT1A6/TPMT/CYP3A4/UPB1/GSTM4/NAT1/GSTM3/HPRT1
hsa00900	Terpenoid backbone biosynthesis	22	0.62759	1.6869	0.017341	0.0382232	0.0191027	4816	tags=59%, list=26%, signal=44%	ACAT1/PDSS1/PDSS2/PCYOX1/ZMPSTE24/HMGCS2/NUS1/MVK/ICMT/RCE1/DHDDS/IDI1/PMVK
hsa00910	Nitrogen metabolism	17	0.62176	1.59291	0.034749	0.0688849	0.0344263	893	tags=29%, list=5%, signal=28%	CA4/CA12/CA2/GLUD1/GLUD2
hsa00450	Selenocompound metabolism	14	0.619012	1.52116	0.0478927	0.0917037	0.0458304	2273	tags=43%, list=12%, signal=38%	SEPSECS/SEPHS2/SCLY/CTH/SEPHS1/MARS2
hsa00561	Glycerolipid metabolism	54	0.618813	1.99786	0.00193424	0.00777393	0.00388515	4642	tags=63%, list=25%, signal=48%	GK/PNPLA3/LPL/CEL/AKR1A1/ALDH3A2/GLYCTK/ALDH1B1/LIPC/ALDH7A1/AGPAT3/DGKH/LCLAT1/LIPG/ALDH9A1/DGKI/DGAT1/ALDH2/AGK/MBOAT2/MOGAT1/AGPAT1/GPAM/AGPAT5/ABHD16A/DGKG/AGPAT2/MGLL/AKR1B1/MOGAT2/DGAT2/PNLIPRP1/DGKZ/GLA
hsa01240	Biosynthesis of cofactors	133	0.61799	2.29945	0.0018315	0.00777393	0.00388515	2570	tags=49%, list=14%, signal=42%	HPD/UGT1A1/UGT2A3/PANK1/GGH/QPRT/UGT2B28/RDH12/KMO/AK4/PSAT1/UGT1A6/AKR1A1/PNPO/RDH11/KYNU/ALDH3A2/ALPL/NFS1/GCLC/DLD/ALDH1B1/ALAS1/HSD17B6/MTHFD2L/RGN/CTPS1/FECH/UROS/GCH1/NQO1/GPHN/NAPRT/GGCX/MTHFD1/OXSM/COQ3/AK9/SPR/MOCS2/AK2/SHMT1/NMNAT1/COX10/COQ6/ALAD/COASY/MAT2A/NADSYN1/TDO2/RFK/GCLM/ALDH2/COQ5/HAAO/NME7/ALPI/ADSL/PTS/NADK2/DHFR/AK8/PMM1/GSS/MOCS1
hsa00030	Pentose phosphate pathway	30	0.616855	1.75742	0.00598802	0.0156431	0.0078179	3679	tags=50%, list=20%, signal=40%	FBP1/IDNK/GLYCTK/RBKS/RGN/DERA/PRPS2/PFKM/ALDOB/SHPK/GPI/PGLS/TALDO1/PGM1/RPE
hsa00970	Aminoacyl-tRNA biosynthesis	23	0.613856	1.6552	0.0176817	0.0384435	0.0192127	3510	tags=57%, list=19%, signal=46%	SEPSECS/VARS2/DARS2/QRSL1/MTFMT/IARS2/PARS2/WARS2/MARS2/HARS2/NARS2/LARS2/EARS2
hsa00480	Glutathione metabolism	53	0.610496	1.96575	0.00194553	0.00777393	0.00388515	2629	tags=45%, list=14%, signal=39%	GSTA1/NAT8/GGT1/ANPEP/GGT6/IDH2/GSTA3/MGST1/IDH1/OPLAH/GCLC/GSTK1/GSR/CHAC2/GSTM4/SMS/GSTM3/LAP3/GCLM/MGST3/RRM2/GGT7/GSS/GPX3
hsa00120	Primary bile acid biosynthesis	17	0.609513	1.56153	0.0444015	0.0859961	0.0429779	3137	tags=59%, list=17%, signal=49%	CYP8B1/AMACR/ACOX2/CYP27A1/SCP2/HSD17B4/CYP39A1/CYP7B1/CYP46A1/ACOT8
hsa00982	Drug metabolism - cytochrome P450	55	0.60262	1.94569	0.00193798	0.00777393	0.00388515	1276	tags=33%, list=7%, signal=31%	GSTA1/FMO1/UGT1A1/UGT2A3/ADH6/UGT2B28/FMO4/CYP2B6/FMO5/GSTA3/MGST1/CYP2E1/UGT1A6/CYP3A4/GSTK1/MAOA/GSTM4/GSTM3
hsa01230	Biosynthesis of amino acids	68	0.593276	1.98241	0.00191939	0.00777393	0.00388515	1704	tags=37%, list=9%, signal=34%	ABHD14A-ACY1/GOT1/IDH2/PC/ASL/PSAT1/ACO2/IDH1/ACO1/GPT2/GOT2/ASS1/PKLR/ENO1/CTH/SDSL/PRPS2/ARG2/IDH3A/CS/SHMT1/PFKM/PSPH/MAT2A/IDH3G
hsa00310	Lysine degradation	58	0.586167	1.90695	0.00196464	0.00777393	0.00388515	2487	tags=38%, list=13%, signal=33%	BBOX1/PIPOX/EHHADH/ACAT1/DHTKD1/ECHS1/PRDM16/HADH/ALDH3A2/DLD/ALDH1B1/GCDH/DLST/ALDH7A1/ALDH9A1/HYKK/NSD1/HADHA/ALDH2/EZH1/EHMT2/SUV39H2
hsa03320	PPAR signaling pathway	73	0.58336	1.9829	0.00189753	0.00777393	0.00388515	1815	tags=40%, list=10%, signal=36%	SLC27A2/PCK1/CYP8B1/EHHADH/GK/PCK2/FABP3/SCD5/ACSL1/LPL/ACOX1/ACAA1/ACOX2/ACADM/AQP7/CPT2/FABP1/ACSL6/PPARA/ACSBG2/CYP27A1/CPT1A/HMGCS2/SCP2/APOC3/SLC27A4/ACSL4/APOA2/DBI
hsa05110	Vibrio cholerae infection	48	0.578468	1.8371	0.00196078	0.00777393	0.00388515	3213	tags=50%, list=17%, signal=42%	ATP6V0A4/ATP6V0D2/ATP6V1G3/ATP6V1B1/ATP6V1C2/ATP6V1A/ATP6V1B2/ATP6V0D1/ATP6V1H/ATP6V0E2/ATP6V0B/ATP6V1D/ADCY9/PRKACB/ATP6V0C/ATP6V0E1/PRKCA/SLC12A2/ATP6V0A1/ATP6AP1/ATP6V1C1/ATP6V1F/ATP6V1G1/ATP6V1E1
hsa00140	Steroid hormone biosynthesis	49	0.565021	1.79769	0.00197628	0.00777393	0.00388515	1469	tags=29%, list=8%, signal=26%	UGT1A1/UGT2A3/CYP17A1/UGT2B28/CYP2E1/DHRS11/UGT1A6/HSD11B2/CYP3A4/HSD17B6/CYP3A7/AKR1C3/SRD5A1/SRD5A3
hsa00010	Glycolysis / Gluconeogenesis	64	0.5511	1.82574	0.00192678	0.00777393	0.00388515	3036	tags=47%, list=16%, signal=39%	PCK1/FBP1/ADH6/PCK2/PDHA1/AKR1A1/ALDH3A2/DLD/BPGM/PKLR/ALDH1B1/ENO1/GALM/ALDH7A1/DLAT/PDHB/ACSS2/MINPP1/ALDH9A1/LDHB/PFKM/ALDH2/G6PC3/ALDOB/TPI1/PGK1/HKDC1/PGAM2/GPI/ADH5
hsa04961	Endocrine and other factor-regulated calcium reabsorption	53	0.544589	1.75354	0.00389105	0.0113216	0.00565817	3884	tags=45%, list=21%, signal=36%	CALB1/KL/PTH1R/KLK1/VDR/ATP1B1/ATP1A1/FXYD2/ADCY9/PRKACB/ATP1B2/AP2A2/AP2B1/DNM3/PRKCA/DNM2/AP2S1/ESR1/SLC8A1/ATP1B3/PLCB2/GNAS/CLTA/TRPV5
hsa04978	Mineral absorption	57	0.539048	1.74504	0.00393701	0.0113216	0.00565817	2000	tags=33%, list=11%, signal=30%	SLC34A1/SLC6A19/SLC39A4/VDR/SLC26A9/ATP1B1/TRPM6/ATP1A1/SLC34A2/FXYD2/SLC31A1/SLC34A3/MT1G/MT1F/TRPM7/SLC5A1/ATOX1/SLC30A1/ATP1B2
hsa00240	Pyrimidine metabolism	55	0.536861	1.73337	0.00387597	0.0113216	0.00565817	2453	tags=24%, list=13%, signal=21%	DPYS/UPP2/ENPP3/ENTPD5/UPB1/CTPS1/NT5E/TYMS/AK9/ENTPD1/NME7/RRM2/ENTPD3
hsa00980	Metabolism of xenobiotics by cytochrome P450	60	0.534823	1.74572	0.00398406	0.0113216	0.00565817	1514	tags=30%, list=8%, signal=28%	GSTA1/UGT1A1/UGT2A3/ADH6/UGT2B28/DHDH/CYP2B6/AKR7A3/GSTA3/MGST1/CYP2E1/UGT1A6/CYP3A4/GSTK1/CBR1/GSTM4/GSTM3/AKR7A2
hsa04142	Lysosome	131	0.529871	1.96358	0.00184162	0.00777393	0.00388515	3900	tags=47%, list=21%, signal=38%	ATP6V0A4/NAPSA/ATP6V0D2/HYAL1/AP1M2/ACP5/ARSB/CTSB/CTSA/FUCA1/ATP6V0D1/LGMN/ATP6V1H/CD164/CTSH/LAMP2/CTNS/ATP6V0B/GLB1/AP3S2/LAPTM4B/NAGPA/ASAH1/NAGLU/CLN5/LAMP1/CTSV/SORT1/GNS/FUCA2/AP3D1/AP1S1/DMXL1/ARSA/AP3M1/TPP1/CTSC/ACP2/SMPD1/AP1G1/ATP6V0C/DMXL2/GBA/ATP6V0A1/HGSNAT/PSAP/CLN3/GNPTAB/AP1M1/ATP6AP1/CTSD/AP3B1/GM2A/AGA/M6PR/AP1S2/AP1B1/CLTA/NAGA/HEXA/WDR7/GNPTG
hsa04973	Carbohydrate digestion and absorption	39	0.529257	1.62016	0.0117647	0.0287298	0.0143581	2005	tags=28%, list=11%, signal=25%	SLC2A2/MGAM/ATP1B1/SLC2A5/SLC37A4/ATP1A1/FXYD2/CACNA1D/SLC5A1/ATP1B2/G6PC3
hsa00860	Porphyrin metabolism	30	0.527897	1.50398	0.0459082	0.088406	0.0441823	1551	tags=30%, list=8%, signal=28%	UGT1A1/UGT2A3/UGT2B28/UGT1A6/ALAS1/FECH/UROS/COX10/ALAD
hsa04721	Synaptic vesicle cycle	77	0.522528	1.7926	0.00378788	0.0113216	0.00565817	3296	tags=42%, list=18%, signal=34%	SLC1A1/ATP6V0A4/ATP6V0D2/ATP6V1G3/ATP6V1B1/ATP6V1C2/SLC6A13/ATP6V1A/ATP6V1B2/UNC13B/ATP6V0D1/ATP6V1H/ATP6V0E2/ATP6V0B/ATP6V1D/STX3/ATP6V0C/ATP6V0E1/AP2A2/AP2B1/DNM3/ATP6V0A1/DNM2/SLC6A12/RAB3A/SLC6A2/ATP6V1C1/ATP6V1F/ATP6V1G1/ATP6V1E1/AP2S1/RIMS1
hsa00830	Retinol metabolism	51	0.521702	1.65986	0.0059761	0.0156431	0.0078179	1731	tags=31%, list=9%, signal=29%	UGT1A1/UGT2A3/ADH6/UGT2B28/RDH12/CYP2B6/UGT1A6/RDH11/CYP3A4/HSD17B6/CYP3A7/RETSAT/DHRS4/CYP2C8/PNPLA4/DGAT1
hsa05204	Chemical carcinogenesis - DNA adducts	52	0.511606	1.63846	0.00588235	0.0156091	0.00780088	1529	tags=31%, list=8%, signal=28%	GSTA1/UGT1A1/UGT2A3/UGT2B28/GSTA3/MGST1/CYP2E1/UGT1A6/CYP3A4/CYP3A7/GSTK1/CBR1/GSTM4/NAT1/GSTM3/CYP2C8
hsa04979	Cholesterol metabolism	50	0.509968	1.62082	0.00397614	0.0113216	0.00565817	1794	tags=30%, list=10%, signal=27%	LPA/ANGPTL3/APOH/APOE/LRP2/LPL/CIDEB/LIPC/LIPG/CYP27A1/VDAC1/SORT1/APOC3/NCEH1/APOA2
hsa04960	Aldosterone-regulated sodium reabsorption	37	0.499704	1.5138	0.0337302	0.0672607	0.0336146	774	tags=24%, list=4%, signal=23%	KCNJ1/SCNN1G/FXYD4/NEDD4L/ATP1B1/HSD11B2/ATP1A1/INSR/FXYD2
hsa00760	Nicotinate and nicotinamide metabolism	37	0.496229	1.50327	0.0416667	0.0811657	0.0405638	4052	tags=54%, list=22%, signal=42%	QPRT/ENPP3/NNT/NT5E/NAPRT/SIRT4/NMNAT1/NUDT12/NADSYN1/NUDT13/AOX1/SIRT5/NADK2/NMRK1/NADK/SIRT7/NT5M/PNP/NMNAT3/ASPDH
hsa01232	Nucleotide metabolism	79	0.487212	1.6744	0.00573614	0.0153419	0.00766735	3395	tags=33%, list=18%, signal=27%	GDA/UPP2/ENPP3/ENTPD5/AK4/CTPS1/NT5E/TYMS/ADK/AK9/HPRT1/AK2/NUDT16/ENTPD1/NME7/RRM2/ADSL/GMPR2/ENTPD3/AK8/AK7/ENTPD2/AK3/ITPA/NTPCR/AK6
hsa05208	Chemical carcinogenesis - reactive oxygen species	200	0.450739	1.76303	0.00182815	0.00777393	0.00388515	3092	tags=42%, list=16%, signal=35%	GSTA1/EGF/SLC26A9/EPHX2/GSTA3/MGST1/CYP2E1/AKR1A1/SLC25A5/NDUFS1/UQCRC1/NDUFA9/SDHB/PPIF/NDUFS2/COX6A1/UQCRFS1/AKR1C3/SDHC/NDUFV2/CBR1/COX5A/NDUFV3/CYC1/UQCR10/GSTM4/NQO1/UQCRQ/CYBA/SLC25A4/PLD1/NOX4/SDHA/SDHD/GSTM3/MAPK13/NDUFB9/COX3/NDUFS3/NDUFS7/COX5B/VDAC1/COX7B/COX8A/NDUFA7/NDUFA3/NRAS/NDUFA2/UQCRH/NDUFB5/NDUFB10/CAT/NDUFA6/NDUFA8/BRAF/ND2/NDUFAB1/MGST3/NDUFV1/NDUFB11/EPHX1/NDUFA12/RAC1/NDUF…
hsa00562	Inositol phosphate metabolism	72	0.448292	1.51448	0.0226415	0.0473925	0.0236851	3542	tags=35%, list=19%, signal=28%	MIOX/ALDH6A1/IMPA2/PIK3C2G/MINPP1/PIP5K1B/INPP5F/PIP4K2C/PLCD4/ITPK1/TPI1/PLCH1/MTMR4/FIG4/INPP5J/SYNJ2/MTMR2/INPP5K/MTM1/PI4K2B/MTMR14/PIP5K1A/PLCH2/PIK3CD/PLCB2
hsa04971	Gastric acid secretion	72	0.444332	1.5011	0.0245283	0.0507119	0.0253441	2345	tags=25%, list=12%, signal=22%	KCNJ15/KCNJ10/SLC26A7/KCNJ1/CA2/MYLK4/ATP1B1/KCNJ16/ATP1A1/KCNK10/ADCY9/CALM1/CALML4/MYLK3/PRKACB/ATP1B2/EZR/PRKCA
hsa04714	Thermogenesis	204	0.441816	1.73909	0.00180832	0.00777393	0.00388515	2828	tags=38%, list=15%, signal=32%	PRKAA2/ACSL1/PRDM16/PPARGC1A/COX11/PRKAB1/NDUFS1/CPT2/UQCRC1/NDUFA9/RPS6KA3/SDHB/NDUFS2/COA3/COX6A1/UQCRFS1/ACSL6/DPF3/SDHC/NDUFV2/COX5A/NDUFV3/CYC1/UQCR10/NDUFAF1/COX16/ADCY9/UQCRQ/NDUFAF5/COX20/SDHA/SDHD/COX18/MAPK13/NDUFB9/COX3/NDUFS3/NDUFS7/COX5B/COX7B/COX8A/CPT1A/NDUFAF4/COX10/NDUFA7/NDUFA3/NRAS/NDUFA2/UQCRH/NDUFB5/NDUFB10/ACSL4/NDUFA6/PRKACB/NDUFA8/ND2/COA1/NDUFAB1/COA6/NDUFV1/NDUFB11/NDUFA…
hsa05012	Parkinson disease	236	0.439657	1.77042	0.00169491	0.00777393	0.00388515	4542	tags=51%, list=24%, signal=39%	MAPT/TUBAL3/SLC39A4/SLC39A5/SLC25A5/NDUFS1/UQCRC1/NDUFA9/SDHB/TUBB2B/PPIF/NDUFS2/COX6A1/SLC39A11/UQCRFS1/CYCS/SDHC/NDUFV2/COX5A/MAOA/NDUFV3/CYC1/UQCR10/UQCRQ/SLC25A4/CALM1/SDHA/TUBB2A/SDHD/UBE2G1/CALML4/NDUFB9/COX3/NDUFS3/NDUFS7/COX5B/VDAC1/COX7B/COX8A/PSMA5/NDUFA7/NDUFA3/NDUFA2/UQCRH/NDUFB5/NDUFB10/NDUFA6/PRKACB/NDUFA8/TRAP1/ND2/PSMD14/NDUFAB1/NDUFV1/PSMB6/TXN/SLC39A8/PSMC2/SLC39A9/NDUFB11/NDUFA…
hsa05415	Diabetic cardiomyopathy	180	0.434587	1.67988	0.00178571	0.00777393	0.00388515	4073	tags=52%, list=22%, signal=41%	REN/MPC2/AGT/PDHA1/MPC1/SLC25A5/NDUFS1/INSR/CPT2/UQCRC1/NDUFA9/SDHB/PPIF/PRKCZ/NDUFS2/GSR/COX6A1/UQCRFS1/SDHC/NDUFV2/PPARA/COX5A/NDUFV3/CYC1/UQCR10/PDHB/UQCRQ/CYBA/SLC25A4/SDHA/SDHD/MAPK13/NDUFB9/COX3/NDUFS3/NDUFS7/COX5B/VDAC1/COX7B/PDK2/COX8A/NDUFA7/NDUFA3/NDUFA2/UQCRH/NDUFB5/ATP2A2/NDUFB10/ACE/NDUFA6/NDUFA8/ND2/NDUFAB1/NDUFV1/NDUFB11/NDUFA12/RAC1/NDUFB2/COX6B1/PRKCA/NDUFC1/PRKCD/NDUFC2/NDUFB4/A…
hsa04922	Glucagon signaling pathway	98	0.423817	1.51693	0.0185874	0.0398977	0.0199395	2972	tags=26%, list=16%, signal=22%	PCK1/SLC2A2/FBP1/PCK2/PRKAA2/PPARGC1A/PDHA1/PRKAB1/PPARA/PDHB/PDE3B/CALM1/CALML4/CPT1A/PHKB/LDHB/PFKM/PRKACB/G6PC3/ITPR3/ACACA/AKT3/PGAM2/PRKAG1/SLC2A1
hsa05016	Huntington disease	277	0.416795	1.71347	0.00165837	0.00777393	0.00388515	5089	tags=49%, list=27%, signal=36%	KCNJ10/TUBAL3/PPARGC1A/SLC25A5/NDUFS1/UQCRC1/NDUFA9/SDHB/TUBB2B/PPIF/NDUFS2/COX6A1/UQCRFS1/CYCS/SDHC/NDUFV2/COX5A/NDUFV3/CYC1/UQCR10/UQCRQ/SLC25A4/SDHA/TUBB2A/SDHD/NDUFB9/COX3/NDUFS3/NDUFS7/COX5B/VDAC1/COX7B/COX8A/PSMA5/NDUFA7/NDUFA3/NDUFA2/UQCRH/NDUFB5/NDUFB10/NDUFA6/POLR2C/NDUFA8/ND2/PSMD14/NDUFAB1/NDUFV1/PSMB6/AP2A2/AP2B1/PSMC2/NDUFB11/NDUFA12/NDUFB2/COX6B1/BAX/NDUFC1/DCTN5/KIF5B/PSMB7/PSMD1/P…
hsa04974	Protein digestion and absorption	98	0.411128	1.47151	0.0260223	0.0528284	0.0264018	847	tags=16%, list=5%, signal=16%	SLC7A9/ACE2/MME/SLC1A1/XPNPEP2/SLC6A19/SLC7A7/SLC7A8/ATP1B1/KCNK5/SLC16A10/ATP1A1/SLC15A1/SLC3A1/FXYD2/SLC3A2
hsa04932	Non-alcoholic fatty liver disease	151	0.367349	1.39851	0.0143885	0.0341473	0.0170657	3107	tags=40%, list=17%, signal=33%	PRKAA2/CYP2E1/PRKAB1/NDUFS1/INSR/PKLR/UQCRC1/NDUFA9/SDHB/NDUFS2/COX6A1/UQCRFS1/CYCS/SDHC/NDUFV2/PPARA/COX5A/NDUFV3/CYC1/UQCR10/UQCRQ/SDHA/SDHD/MAPK13/NDUFB9/COX3/NDUFS3/NDUFS7/COX5B/COX7B/COX8A/NDUFA7/NDUFA3/NDUFA2/UQCRH/NDUFB5/NDUFB10/NDUFA6/NDUFA8/NDUFAB1/NDUFV1/CDC42/NDUFB11/NDUFA12/RAC1/NDUFB2/COX6B1/BAX/NDUFC1/NDUFC2/NDUFB4/NDUFB6/MAPK8/COX2/AKT3/UQCRB/PRKAG1/MLX/NDUFA1/MLXIPL
hsa00230	Purine metabolism	118	0.361559	1.33061	0.0490909	0.0934669	0.0467115	3740	tags=35%, list=20%, signal=28%	GDA/ENPP3/ENTPD5/AK4/PDE10A/FHIT/PDE7A/NT5E/PDE8A/ADCY9/ADK/PDE3B/PRPS2/AK9/HPRT1/AK2/NUDT16/ATIC/PAICS/ENTPD1/PFAS/NME7/RRM2/ADSL/GMPR2/ENTPD3/AK8/PDE8B/PDE4D/NUDT5/AK7/ENTPD2/AK3/ITPA/NTPCR/NUDT9/AK6/GART/PGM1/NT5M/PNP
hsa05020	Prion disease	245	0.340317	1.38009	0.003367	0.0103153	0.00515522	3150	tags=33%, list=17%, signal=28%	TUBAL3/SLC25A5/NDUFS1/HSPA8/UQCRC1/NDUFA9/SDHB/TUBB2B/PPIF/NDUFS2/CACNA1D/COX6A1/UQCRFS1/CYCS/SDHC/NDUFV2/COX5A/NDUFV3/CYC1/UQCR10/STIP1/UQCRQ/CYBA/SLC25A4/SDHA/TUBB2A/SDHD/MAPK13/NDUFB9/COX3/NDUFS3/NDUFS7/COX5B/VDAC1/COX7B/NCAM1/COX8A/PSMA5/NDUFA7/NDUFA3/NDUFA2/UQCRH/NDUFB5/NDUFB10/NDUFA6/PRKACB/NDUFA8/ND2/PSMD14/NDUFAB1/NDUFV1/PSMB6/PSMC2/NDUFB11/NDUFA12/RAC1/NDUFB2/COX6B1/BAX/NDUFC1/KIF5B/PSMB…
hsa05014	Amyotrophic lateral sclerosis	330	0.335381	1.39618	0.00335571	0.0103153	0.00515522	5098	tags=44%, list=27%, signal=32%	TUBAL3/CHCHD10/NDUFS1/UQCRC1/NDUFA9/SDHB/TUBB2B/NDUFS2/COX6A1/UQCRFS1/CYCS/SDHC/NDUFV2/COX5A/NDUFV3/CYC1/UQCR10/UQCRQ/SDHA/TUBB2A/ERBB4/SDHD/MAPK13/NDUFB9/COX3/NDUFS3/NDUFS7/COX5B/VDAC1/COX7B/MAP2K6/COX8A/PSMA5/NDUFA7/NDUFA3/NDUFA2/NCBP1/UQCRH/NDUFB5/NDUFB10/CAT/NDUFA6/NDUFA8/ND2/PSMD14/UBQLN1/NEFL/NDUFAB1/NDUFV1/PSMB6/PSMC2/VCP/NDUFB11/NDUFA12/RAC1/NDUFB2/COX6B1/PINK1/BAX/NDUFC1/DCTN5/KIF5B/PSMB…
hsa05010	Alzheimer disease	350	0.326382	1.36664	0.00333333	0.0103153	0.00515522	3745	tags=35%, list=20%, signal=28%	MME/MAPT/TUBAL3/SLC39A4/SLC39A5/APOE/LPL/SLC25A5/NDUFS1/INSR/CDK5/UQCRC1/NDUFA9/SDHB/TUBB2B/PPIF/NDUFS2/CACNA1D/COX6A1/SLC39A11/UQCRFS1/HSD17B10/CYCS/SDHC/NDUFV2/COX5A/NDUFV3/CYC1/UQCR10/UQCRQ/PSEN1/SLC25A4/PPID/CALM1/NOX4/SDHA/TUBB2A/SDHD/CALML4/NDUFB9/COX3/NDUFS3/IDE/NDUFS7/COX5B/VDAC1/COX7B/COX8A/PSMA5/NDUFA7/NDUFA3/NRAS/NDUFA2/UQCRH/NDUFB5/ATP2A2/NDUFB10/NDUFA6/NDUFA8/BRAF/ND2/PSMD14/NDUFAB1/…
hsa05131	Shigellosis	215	-0.321205	-1.32146	0.0162791	0.0365736	0.0182783	3950	tags=31%, list=21%, signal=25%	ACTB/PIK3R3/CCL5/PTK2/MAPK3/CRKL/HK3/SQSTM1/RRAGC/CD44/CBX3/TAB2/MAPK14/ARF1/IRF3/PLCD3/RELA/PIK3CA/MAP3K7/ARF6/PLCB4/CYTH1/ROCK1/RPS6KB1/U2AF1L4/IL18/ARHGEF2/WASF1/MDM2/U2AF1/PYCARD/ATG12/ARPC5/MAP1LC3C/NOD1/FOXO3/UBC/HCLS1/RPS6KA5/ITPR1/ELMO1/TIFA/ARPC1B/TRAF5/TLR4/ACTR3/CAST/BCL10/CASP4/TNFRSF1A/CASP1/CYTH3/FNBP1/WASF2/MYL9/UBE2D3/IL1R1/NFKBIA/PLCE1/FOXO6/JUN/IL1B/PIK3R1/HK2/C3/CXCL8
hsa05165	Human papillomavirus infection	320	-0.327992	-1.40051	0.00740741	0.0187691	0.00938018	3385	tags=29%, list=18%, signal=24%	RBPJ/KRAS/ITGA9/HLA-G/PKM/CASP3/RBL2/DVL1/WNT5A/IRF3/LAMB2/NFX1/RELA/PIK3CA/COL4A6/HLA-B/COL1A1/HLA-C/CDKN1B/TBP/COL2A1/PPP2R2A/EP300/PARD6B/LAMB1/RPS6KB1/COL4A2/TCF7/TCF7L2/CCNE2/HLA-F/CREB5/CCND1/CREB1/NOTCH3/TCIRG1/IFNAR1/WNT6/MDM2/DVL2/HES4/BAD/MX2/IFNAR2/VEGFA/ITGB8/LAMC1/CSNK1A1/MFNG/ITGA3/NOTCH2/THBS3/HEY1/COL4A5/PPP2CA/FAS/PPP2R2C/PRKCI/FN1/WNT9A/FZD7/CDK6/TNFRSF1A/RAF1/TCF7L1/JAG1/FZD2/R…
hsa04010	MAPK signaling pathway	293	-0.337721	-1.42758	0.00245098	0.00794212	0.0039692	2059	tags=28%, list=11%, signal=25%	CDC25B/HSPA1A/KRAS/NGFR/TAB2/MAPK14/CASP3/GADD45G/VEGFC/PLA2G4A/RELA/DDIT3/PPP3CA/MAP3K7/MAP3K1/MAP3K6/DUSP2/GNA12/DUSP16/STK4/NTRK2/MRAS/TAOK1/NFATC3/NR4A1/DUSP4/DAXX/VEGFA/MAP3K3/RPS6KA5/ATF4/FLNA/HSPA6/MAP3K5/PPP3CC/DUSP8/FLT4/CACNB3/RAC2/NGF/TGFBR2/MEF2C/MET/PDGFD/FAS/NTF3/RASA2/TGFB3/FGF2/MAP4K4/FLNB/TNFRSF1A/JUND/RAF1/CSF1/SRF/VEGFB/NFATC1/ARRB1/RRAS/IL1R1/EPHA2/PDGFRB/FGF7/FGFR1/PGF/IL1RAP…
hsa05152	Tuberculosis	172	-0.33857	-1.35416	0.0224215	0.0472253	0.0236016	2335	tags=26%, list=12%, signal=23%	ARHGEF12/HLA-DPB1/IL18/HLA-DMB/HLA-DQA1/CREB1/LSP1/TCIRG1/BAD/CLEC7A/HLA-DRB1/MRC1/PLK3/IFNGR2/FCGR2B/ITGAM/PPP3CC/CD74/IFNGR1/FCGR3B/HLA-DRA/SPHK1/TLR4/HLA-DPA1/CD209/TGFB3/HLA-DMA/BCL10/CTSS/RFXAP/TNFRSF1A/RAF1/SYK/MRC2/JAK1/IL10RB/NFYB/EEA1/CLEC4M/HLA-DQB1/IL1B/TGFB2/CEBPB/C3/IL6
hsa05168	Herpes simplex virus 1 infection	458	-0.33901	-1.49551	0.0025974	0.0081806	0.00408839	4973	tags=38%, list=27%, signal=28%	NXF2/RBAK/IRF9/ZNF74/TAB1/ZNF141/ZNF791/PPP1CB/ZNF766/ZNF665/ZNF112/ZNF891/ZNF551/ZFP92/ZNF510/IRAK4/ZNF195/TAPBP/ZNF268/ZNF45/ZNF561/ZNF182/ZNF100/HLA-DOB/ZNF573/ZNF814/EIF2AK4/ZNF382/ZNF343/NFKB1/ZNF248/SRSF3/PML/ZNF623/ZNF589/ZNF621/ITGA5/ZNF200/ZNF420/ZNF432/ZNF226/PILRA/ZNF570/ZNF441/ZNF3/ZNF320/ZNF224/ZNF850/ZNF416/ZNF584/PIK3R3/ZNF140/ZNF585A/RNASEL/ZNF251/CCL5/ZNF471/BID/ZNF662/JAK2/ZNF23…
hsa04110	Cell cycle	153	-0.339331	-1.33602	0.0271493	0.0544602	0.0272174	3605	tags=28%, list=19%, signal=23%	WEE1/STAG1/ZBTB17/CDC25B/RBL2/GADD45G/ANAPC10/CDT1/SMC3/MCM7/MCM2/CDKN1B/DBF4/EP300/CCNE2/SMAD2/CCND1/NIPBL/MCM5/MDM2/CDKN2A/MCM3/CHEK2/FBXO5/ABL1/SMAD3/CDC7/SKP2/ESCO1/PPP2CA/ATRX/TGFB3/CDK6/CCNA1/CDKN2C/STAG2/NDC80/CDKN1A/SFN/GADD45B/TGFB2/CCND2/MYC
hsa04014	Ras signaling pathway	221	-0.343743	-1.41431	0.00476191	0.0128381	0.00641604	2021	tags=19%, list=11%, signal=17%	SHC2/BAD/VEGFA/ABL2/ABL1/FLT4/RAC2/RASSF1/NGF/MET/PDGFD/RALGDS/NTF3/RASA2/ETS1/FGF2/RAF1/GNG11/CSF1/VEGFB/RRAS/ETS2/GNG4/EPHA2/GAB2/PLA1A/PDGFRB/FGF7/REL/PLCE1/FGFR1/PGF/PAK3/TIAM1/FGF18/GRIN2A/PIK3R1/RASSF5/PLA2G2A/ANGPT2/IGF2/IGF1
hsa04934	Cushing syndrome	152	-0.345314	-1.35586	0.0158371	0.0358195	0.0179014	3184	tags=29%, list=17%, signal=24%	GNAQ/DVL1/WNT5A/GNAI2/LEF1/CDKN1B/PLCB4/SP1/PBX1/TCF7/TCF7L2/CCNE2/GNAI3/CREB5/ADCY3/CCND1/CREB1/WNT6/CDKN2A/NR4A1/AIP/DVL2/ATF4/ITPR1/CYP11A1/KMT2A/WNT9A/FZD7/ADCY8/CDK6/TCF7L1/FZD2/ARNT/WNT2/LDLR/CTNNB1/CDKN2C/AHR/FZD1/ADCY7/CDKN1A/WNT5B/ADCY2/WNT2B
hsa04514	Cell adhesion molecules	146	-0.348828	-1.36919	0.0221239	0.0468915	0.0234348	3000	tags=31%, list=16%, signal=26%	HLA-B/HLA-C/CD99L2/ITGB2/NLGN4X/CADM3/ESAM/HLA-F/SELP/CD86/GLG1/HLA-DPB1/HLA-DMB/HLA-DQA1/SDC2/HLA-DRB1/ITGB8/ITGAM/CD274/CDH5/HLA-DRA/CD99/MPZL1/HLA-DPA1/HLA-DMA/JAM3/CD34/CDH3/PTPRC/ICAM2/SELL/VCAM1/CD40/NRXN3/CLDN11/NEGR1/HLA-DQB1/VCAN/PECAM1/CLDN1/JAM2/SELE/CLDN5/ICAM1/SLITRK5
hsa04151	PI3K-Akt signaling pathway	348	-0.352207	-1.51639	0.00250627	0.00796803	0.00398215	2631	tags=22%, list=14%, signal=20%	PPP2R2A/LAMB1/PHLPP1/RPS6KB1/COL4A2/CCNE2/NTRK2/CREB5/CCND1/CREB1/MCL1/IFNAR1/MDM2/NR4A1/BAD/MAGI2/IFNAR2/VEGFA/FOXO3/ITGB8/LAMC1/ATF4/PKN3/ITGA3/FLT4/PKN1/THBS3/COL4A5/NGF/PPP2CA/MET/PDGFD/PPP2R2C/NTF3/TLR4/FN1/FGF2/CDK6/RAF1/GNG11/CSF1/RELN/OSMR/SYK/F2R/VEGFB/LPAR6/PIK3CG/JAK1/LAMA2/GNG4/EPHA2/PDGFRB/FGF7/THBS4/FGFR1/IL4R/THBS1/PGF/CDKN1A/FGF18/ITGA1/PIK3R1/LPAR1/THBS2/CCND2/COL6A3/MYC/COMP/ARE…
hsa05203	Viral carcinogenesis	163	-0.354014	-1.40376	0.00692841	0.0176884	0.00884007	4115	tags=36%, list=22%, signal=28%	GTF2E2/SNW1/CREB3L2/PIK3R3/GTF2H3/MAPK3/CCND3/RANBP1/STAT5B/STAT3/HLA-E/RBPJ/KRAS/IL6ST/DDX3X/HLA-G/PKM/CASP3/RBL2/IRF3/LYN/RELA/PIK3CA/HLA-B/HLA-C/CDKN1B/TBP/EP300/HDAC4/CCNE2/HLA-F/CREB5/CCND1/CREB1/MDM2/CDKN2A/SP100/BAD/ATF4/SKP2/TRAF5/RASA2/CDK6/SRF/SYK/PMAIP1/JAK1/CCNA1/NFKBIA/REL/CDKN1A/JUN/PIK3R1/EGR2/GSN/CCND2/C3/EGR3
hsa04936	Alcoholic liver disease	136	-0.355154	-1.38216	0.0173536	0.0382232	0.0191027	3308	tags=32%, list=18%, signal=26%	TAB2/MAPK14/CASP3/CAMKK2/IRF3/RELA/LEF1/MAP3K7/ADH1A/SIRT1/IL17RA/TCF7/TCF7L2/CCND1/PRKAB2/C2/ADIPOQ/FOXO3/C1QB/MAP3K5/C1QC/TRA2A/LPIN1/FAS/TLR4/C1QA/TRA2B/TNFRSF1A/TCF7L1/C5AR1/ADH1C/C5/CTNNB1/NFKBIA/IL1B/CXCL3/LY96/ADH1B/C3/CXCL8/IL6/CXCL1/CXCL2
hsa05132	Salmonella infection	243	-0.360879	-1.49339	0.00248139	0.00796408	0.00398017	3308	tags=29%, list=18%, signal=24%	TAB2/MAPK14/CASP3/GCC2/RHOB/ARF1/RELA/PIK3CA/TUBB/LEF1/MAP3K7/ARF6/TUBA1A/RAB5B/DCTN1/ACBD3/ARHGEF26/CYTH1/TCF7/TCF7L2/PLEKHM2/SNX9/IL18/TUBB1/TNFRSF10B/PYCARD/ARPC5/NOD1/SNX33/KLC3/RPS3/TNFRSF10A/CASP7/FLNA/ELMO1/PKN1/ARPC1B/DYNC1I1/TLR4/ACTR3/ANXA2/KLC1/WASF3/CASP4/FLNB/TNFRSF1A/AHNAK/CASP1/RAF1/RHOJ/TCF7L1/PTPRC/CYTH3/TUBB6/MYL9/PIK3CG/RRAS/CTNNB1/NFKBIA/RAB7B/PAK3/JUN/BIRC3/FOS/IL1B/LY96/MYC/…
hsa04935	Growth hormone synthesis, secretion and action	118	-0.361019	-1.37161	0.0265487	0.0535743	0.0267746	3833	tags=31%, list=20%, signal=24%	PTK2/MAPK3/JAK2/STAT5B/CRKL/STAT3/SOCS2/KRAS/MAPK14/GHR/GNAQ/GNAI2/PIK3CA/MAP3K1/PLCB4/EP300/GNAI3/CREB5/ADCY3/CREB1/SHC1/SHC2/ATF4/ITPR1/IRS2/ADCY8/RAF1/ADCY7/FOS/PIK3R1/ADCY2/SOCS3/JUNB/IGFBP3/SST/IGF1
hsa04210	Apoptosis	132	-0.363336	-1.40675	0.0174672	0.0382238	0.0191029	3448	tags=32%, list=18%, signal=26%	APAF1/SPTAN1/KRAS/CASP3/GADD45G/RELA/PIK3CA/DDIT3/LMNB2/BCL2L11/TUBA1A/EIF2S1/CTSF/ERN1/HRK/LMNA/PTPN13/MCL1/TNFRSF10B/BAD/DAXX/TNFRSF10A/EIF2AK3/CASP7/ATF4/ITPR1/MAP3K5/NGF/FAS/CSF2RB/CTSS/TNFRSF1A/RAF1/PMAIP1/NFKBIA/JUN/BIRC3/FOS/PIK3R1/GADD45B/BCL2A1/CTSK
hsa05418	Fluid shear stress and atherosclerosis	132	-0.364481	-1.41119	0.0152838	0.0357882	0.0178857	2306	tags=25%, list=12%, signal=22%	HMOX1/ARHGEF2/GPC1/SDC2/VEGFA/MAP3K5/RAC2/CDH5/MEF2C/BMPR1B/BMPR1A/TNFRSF1A/CTNNB1/IL1R1/NCF2/THBD/VCAM1/JUN/BMP4/DUSP1/KLF2/FOS/MMP2/MMP9/IL1B/PIK3R1/CAV1/GSTT1/PECAM1/GSTM5/CCL2/SELE/ICAM1
hsa04640	Hematopoietic cell lineage	94	-0.364748	-1.33135	0.0413043	0.0809277	0.0404449	2457	tags=24%, list=13%, signal=21%	CD38/HLA-DPB1/CD1D/HLA-DMB/HLA-DQA1/HLA-DRB1/ITGA3/ITGAM/CD9/HLA-DRA/HLA-DPA1/HLA-DMA/CD34/CSF1/IL11RA/IL1R1/CD55/IL4R/ITGA1/HLA-DQB1/IL1B/CD36/IL6
hsa05215	Prostate cancer	96	-0.365347	-1.34547	0.0406852	0.0801808	0.0400716	3042	tags=31%, list=16%, signal=26%	RELA/PIK3CA/LEF1/CDKN1B/EP300/TCF7/TCF7L2/CCNE2/CREB5/CCND1/CREB1/MDM2/BAD/PLAU/ATF4/NKX3-1/AR/PDGFD/ERG/RAF1/TCF7L1/CTNNB1/PDGFRB/NFKBIA/FGFR1/CDKN1A/MMP9/PIK3R1/MMP3/IGF1
hsa05225	Hepatocellular carcinoma	160	-0.372613	-1.4711	0.00228311	0.00777393	0.00388515	2522	tags=31%, list=13%, signal=27%	LRP6/DVL1/WNT5A/ARID1B/PIK3CA/PHF10/LEF1/RPS6KB1/TCF7/TCF7L2/SMAD2/CCND1/HMOX1/SHC1/WNT6/CDKN2A/DVL2/SHC2/BAD/SMARCA2/SMARCD2/CSNK1A1/SMAD3/SMARCE1/TGFBR2/MET/SMARCC2/TGFB3/WNT9A/FZD7/CDK6/RAF1/TCF7L1/FZD2/WNT2/CTNNB1/DDB2/FZD1/CDKN1A/WNT5B/SMARCD3/PIK3R1/GSTT1/GSTM5/GADD45B/TGFB2/MYC/WNT2B/IGF2
hsa04650	Natural killer cell mediated cytotoxicity	124	-0.379999	-1.45356	0.0130719	0.0312428	0.0156141	3940	tags=31%, list=21%, signal=24%	PIK3R3/LAT/BID/MAPK3/HLA-E/HCST/KRAS/HLA-G/CASP3/PIK3CA/HLA-B/PPP3CA/HLA-C/ITGB2/FCER1G/SHC1/TNFRSF10B/IFNAR1/SHC2/IFNAR2/TNFRSF10A/IFNGR2/PPP3CC/FYN/IFNGR1/RAC2/FCGR3B/FAS/MICA/RAF1/TYROBP/SYK/LCP2/NFATC1/ICAM2/NFATC2/PIK3R1/ICAM1
hsa03040	Spliceosome	121	-0.383551	-1.46096	0.00881057	0.0218321	0.0109109	3812	tags=39%, list=20%, signal=31%	SNRPB/SNRPD1/SF3A2/DHX38/SMNDC1/SNRNP70/RBM17/HSPA1A/PPIH/PRPF40A/SNRPA/ACIN1/TCERG1/SRSF10/SLU7/PLRG1/U2AF2/PPIE/HNRNPC/RBM22/HNRNPU/DDX5/THOC2/MAGOH/SNRNP40/SF3A1/LSM7/U2AF1L4/LSM5/U2AF1/ALYREF/DDX42/SF3B1/PRPF3/SRSF4/LSM8/HNRNPA3/HNRNPM/HSPA6/SRSF7/PRPF38A/TRA2A/PRPF38B/U2SURP/RBM25/SNRPA1/TRA2B
hsa05222	Small cell lung cancer	92	-0.384665	-1.40128	0.0217865	0.0464687	0.0232234	3485	tags=32%, list=19%, signal=26%	ZBTB17/APAF1/CASP3/GADD45G/LAMB2/RELA/PIK3CA/COL4A6/CDKN1B/LAMB1/COL4A2/CCNE2/CCND1/LAMC1/ITGA3/SKP2/COL4A5/TRAF5/FN1/CDK6/LAMA2/DDB2/NFKBIA/CDKN1A/BIRC3/PIK3R1/GADD45B/MYC/PTGS2
hsa05164	Influenza A	161	-0.38584	-1.52863	0.00226757	0.00777393	0.00388515	2335	tags=34%, list=12%, signal=30%	ACTB/PIK3R3/RNASEL/CCL5/MX1/BID/MAPK3/CCND3/JAK2/DNAJB1/NUP98/APAF1/CASP3/IRF3/RELA/PIK3CA/TRIM25/EIF2S1/EP300/HLA-DPB1/IL18/HLA-DMB/HLA-DQA1/TNFRSF10B/IFNAR1/PYCARD/MX2/IFNAR2/HLA-DRB1/TNFRSF10A/IFNGR2/RSAD2/IFNGR1/HLA-DRA/NXT1/FAS/TLR4/HLA-DPA1/HLA-DMA/CDK6/TNFRSF1A/CASP1/RAF1/JAK1/KPNA5/NFKBIA/HLA-DQB1/IL1B/PIK3R1/SOCS3/IL33/CCL2/ICAM1/CXCL8/IL6
hsa04921	Oxytocin signaling pathway	146	-0.391286	-1.53584	0.00442478	0.0120254	0.00600989	3256	tags=30%, list=17%, signal=25%	CAMKK2/GNAQ/OXTR/PLA2G4A/GNAI2/PPP3CA/CAMK1/PLCB4/KCNJ4/ROCK1/CD38/NPR2/GNAI3/ADCY3/CCND1/PRKAB2/NFATC3/CAMK1D/ITPR1/EEF2K/PPP3CC/CACNB3/MEF2C/PPP1R12A/ADCY8/PPP1R12B/RGS2/RAF1/NFATC1/MYL9/PIK3CG/KCNJ12/NFATC2/GUCY1A2/NPR1/ADCY7/CDKN1A/JUN/FOS/KCNJ6/NFATC4/KCNJ2/ADCY2/PTGS2
hsa05135	Yersinia infection	132	-0.391491	-1.51576	0.00218341	0.00777393	0.00388515	3970	tags=33%, list=21%, signal=26%	MAP2K7/ACTB/FCGR2A/PIK3R3/LAT/PTK2/MAPK3/CRKL/BAIAP2/TAB2/MAPK14/GNAQ/IRF3/RELA/PIK3CA/MAP3K7/ARF6/ROCK1/ARHGEF12/IL18/WIPF1/NFATC3/PYCARD/ARPC5/ELMO1/PKN1/RAC2/ARPC1B/TLR4/ACTR3/FN1/CASP1/LCP2/WASF2/NFATC1/NFATC2/NFKBIA/JUN/FOS/IL1B/PIK3R1/CCL2/CXCL8/IL6
hsa05169	Epstein-Barr virus infection	193	-0.391797	-1.59509	0.00225225	0.00777393	0.00388515	3980	tags=35%, list=21%, signal=28%	FCER2/MAP2K7/PIK3R3/BID/PSMD4/CCND3/STAT3/MAP3K14/HLA-E/APAF1/CD44/RBPJ/HLA-G/TAB2/MAPK14/CASP3/GADD45G/IRF3/LYN/RELA/PIK3CA/HLA-B/SIN3A/HLA-C/MAP3K7/BCL2L11/CDKN1B/PSMD13/CCNE2/HLA-F/CIR1/HLA-DPB1/CCND1/HLA-DMB/HLA-DQA1/IFNAR1/MDM2/IFNAR2/HLA-DRB1/NCOR2/SAP30/SKP2/TAP1/HLA-DRA/TRAF5/FAS/HLA-DPA1/HLA-DMA/CDK6/NFKBIE/SYK/JAK1/CCNA1/DDB2/HES1/NFKBIA/VIM/CD40/CDKN1A/JUN/HLA-DQB1/PIK3R1/GADD45B/CCND2…
hsa05145	Toxoplasmosis	106	-0.392306	-1.47264	0.00858369	0.0214274	0.0107087	3383	tags=34%, list=18%, signal=28%	HSPA1A/TAB2/MAPK14/CASP3/LAMB2/GNAI2/RELA/MAP3K7/LAMB1/GNAI3/HLA-DPB1/HLA-DMB/HLA-DQA1/BAD/HLA-DRB1/LAMC1/HSPA6/IFNGR2/IFNGR1/HLA-DRA/TLR4/HLA-DPA1/TGFB3/HLA-DMA/TNFRSF1A/PIK3CG/JAK1/IL10RB/LDLR/LAMA2/NFKBIA/CD40/BIRC3/HLA-DQB1/LY96/TGFB2
hsa05162	Measles	133	-0.393189	-1.52262	0.00219298	0.00777393	0.00388515	3940	tags=29%, list=21%, signal=23%	PIK3R3/MX1/BID/CCND3/STAT5B/STAT3/APAF1/HSPA1A/TAB2/CASP3/IRF3/RELA/PIK3CA/MAP3K7/CDKN1B/EIF2S1/CCNE2/CCND1/IFNAR1/BAD/MX2/IFNAR2/EIF2AK3/HSPA6/FCGR2B/FAS/TLR4/CD209/CDK6/JAK1/NFKBIA/JUN/CLEC4M/FOS/IL1B/PIK3R1/CCND2/TNFAIP3/IL6
hsa04611	Platelet activation	119	-0.394213	-1.49974	0.00660793	0.016999	0.00849553	3294	tags=29%, list=18%, signal=24%	MAPK14/GNAQ/PLA2G4A/GNAI2/PTGIR/LYN/PIK3CA/COL1A1/PLCB4/FCER1G/ROCK1/ARHGEF12/GNAI3/ADCY3/P2RY12/ITPR1/FYN/PPP1R12A/PRKCI/P2RY1/ADCY8/SYK/LCP2/F2R/PIK3CG/FGA/GUCY1A2/ADCY7/PIK3R1/COL3A1/ADCY2/COL1A2/VWF/FGG
hsa04520	Adherens junction	86	-0.398068	-1.43126	0.017094	0.0381502	0.0190662	4015	tags=42%, list=21%, signal=33%	MYL12A/PTPRJ/ACTB/SNAI2/MAPK3/BAIAP2/CTNNA1/SNAI1/LEF1/MAP3K7/TJP1/HEG1/EP300/ROCK1/TCF7/TCF7L2/RADIL/IQGAP1/WASF1/RASIP1/ARHGAP29/SMAD3/FYN/RAC2/CDH5/TGFBR2/MET/SMURF2/FER/WASF3/SORBS1/TCF7L1/WASF2/MYL9/CTNNB1/FGFR1
hsa04015	Rap1 signaling pathway	202	-0.399354	-1.63643	0.00224719	0.00777393	0.00388515	1640	tags=21%, list=9%, signal=20%	ITGAM/FLT4/RAC2/ENAH/NGF/MET/PDGFD/RALGDS/PRKD3/DOCK4/PRKCI/P2RY1/FGF2/ADCY8/RAF1/ID1/RAPGEF3/CSF1/LCP2/F2R/VEGFB/RRAS/PARD6G/CTNNB1/EPHA2/PDGFRB/FGF7/ADCY7/PLCE1/FGFR1/THBS1/PGF/TIAM1/FGF18/GRIN2A/SIPA1L2/PIK3R1/RASSF5/LPAR1/ADCY2/CNR1/ANGPT2/IGF1
hsa04630	JAK-STAT signaling pathway	161	-0.403537	-1.59874	0.00226757	0.00777393	0.00388515	4029	tags=31%, list=21%, signal=25%	IL21R/IL10RA/STAT4/PIK3R3/CSF3R/CCND3/JAK2/STAT5B/STAT3/OSM/SOCS2/IL6ST/CLCF1/GHR/PIAS1/IL6R/IL12RB1/PIK3CA/PIAS3/EP300/CCND1/MCL1/IFNAR1/IFNAR2/SOCS5/IFNGR2/IFNGR1/IL15RA/CSF2RB/RAF1/IL13RA1/IL20RA/OSMR/LIFR/IL11RA/JAK1/IL10RB/LIF/PDGFRB/IL4R/CDKN1A/FHL1/PIK3R1/TSLP/SOCS3/LEPR/CCND2/PIM1/MYC/IL6
hsa05226	Gastric cancer	145	-0.404053	-1.58163	0.00442478	0.0120254	0.00600989	3682	tags=33%, list=20%, signal=27%	WNT11/CTNNA1/FZD10/APC/KRAS/GADD45G/LRP6/DVL1/WNT5A/PIK3CA/LEF1/CDKN1B/RPS6KB1/TCF7/TCF7L2/CCNE2/JUP/SMAD2/CCND1/SHC1/WNT6/DVL2/SHC2/CSNK1A1/SMAD3/TGFBR2/MET/TGFB3/WNT9A/FZD7/FGF2/RAF1/TCF7L1/FZD2/WNT2/CTNNB1/DDB2/FGF7/FZD1/CDKN1A/FGF18/WNT5B/CDH17/PIK3R1/GADD45B/TGFB2/MYC/WNT2B
hsa04658	Th1 and Th2 cell differentiation	89	-0.411742	-1.48293	0.010917	0.0268543	0.0134209	3971	tags=40%, list=21%, signal=32%	STAT4/LAT/MAPK3/JAK2/STAT5B/NOTCH1/RBPJ/MAPK14/IL12RB1/RELA/PPP3CA/HLA-DPB1/HLA-DMB/HLA-DQA1/NOTCH3/NFATC3/HLA-DRB1/DLL1/IFNGR2/PPP3CC/NOTCH2/IFNGR1/JAG2/HLA-DRA/HLA-DPA1/HLA-DMA/NFKBIE/JAG1/NFATC1/JAK1/NFATC2/NFKBIA/IL4R/JUN/FOS/HLA-DQB1
hsa05161	Hepatitis B	159	-0.413648	-1.62946	0.00229358	0.00777393	0.00388515	3971	tags=32%, list=21%, signal=26%	STAT4/MAP2K7/PIK3R3/BID/MAPK3/JAK2/STAT5B/STAT3/APAF1/KRAS/DDX3X/TAB2/MAPK14/CASP3/IRF3/RELA/PIK3CA/MAP3K7/MAP3K1/EP300/CCNE2/CREB5/CREB1/NFATC3/IFNAR1/BAD/ATF4/SMAD3/TGFBR2/FAS/TLR4/TGFB3/RAF1/NFATC1/JAK1/CCNA1/NFATC2/DDB2/NFKBIA/CDKN1A/JUN/FOS/MMP9/NFATC4/PIK3R1/EGR2/TGFB2/MYC/EGR3/CXCL8/IL6
hsa05210	Colorectal cancer	86	-0.414188	-1.48922	0.0128205	0.0308608	0.0154232	3380	tags=36%, list=18%, signal=30%	KRAS/CASP3/GADD45G/PIK3CA/LEF1/BCL2L11/RPS6KB1/TCF7/TCF7L2/SMAD2/CCND1/APPL1/BAD/SMAD3/RAC2/TGFBR2/RALGDS/TGFB3/RAF1/TCF7L1/PMAIP1/CTNNB1/DDB2/CDKN1A/JUN/FOS/PIK3R1/GADD45B/TGFB2/MYC/AREG
hsa05218	Melanoma	72	-0.416293	-1.44889	0.0254237	0.051926	0.0259509	2318	tags=25%, list=12%, signal=22%	CCND1/MDM2/CDKN2A/BAD/MET/PDGFD/FGF2/CDK6/RAF1/PDGFRB/DDB2/FGF7/FGFR1/CDKN1A/FGF18/PIK3R1/GADD45B/IGF1
hsa04218	Cellular senescence	152	-0.418509	-1.64325	0.00226244	0.00777393	0.00388515	3520	tags=34%, list=19%, signal=28%	SQSTM1/HLA-E/KRAS/HLA-G/MAPK14/RBL2/GADD45G/RELA/PIK3CA/HLA-B/PPP3CA/HLA-C/RAD50/HIPK1/RBBP4/SIRT1/CCNE2/HLA-F/RAD1/SMAD2/MRAS/CCND1/NFATC3/MDM2/CDKN2A/FOXO3/CHEK2/ITPR1/SMAD3/PPP3CC/HIPK2/TGFBR2/TGFB3/ETS1/CDK6/RAF1/NFATC1/RRAS/CCNA1/NFATC2/CDKN1A/NFATC4/PIK3R1/RASSF5/SERPINE1/GADD45B/TGFB2/CCND2/IGFBP3/MYC/CXCL8/IL6
hsa05163	Human cytomegalovirus infection	215	-0.423465	-1.74217	0.00232558	0.00777393	0.00388515	3380	tags=31%, list=18%, signal=26%	KRAS/GNB1/HLA-G/MAPK14/CASP3/GNAQ/IL6R/CXCR2/IRF3/GNAI2/RELA/PIK3CA/HLA-B/PPP3CA/HLA-C/PLCB4/SP1/GNA12/ROCK1/RPS6KB1/HLA-F/ARHGEF12/GNAI3/CREB5/ADCY3/CCND1/CREB1/NFATC3/MDM2/CDKN2A/VEGFA/ATF4/ITPR1/PPP3CC/CXCR4/RAC2/TAP1/AKAP13/TRAF5/FAS/ADCY8/CDK6/TNFRSF1A/RAF1/GNG11/NFATC1/JAK1/IL10RB/CTNNB1/IL1R1/GNG4/NFATC2/CCL4/PTGER2/NFKBIA/ADCY7/CCL3/CDKN1A/IL1B/NFATC4/PIK3R1/ADCY2/MYC/CCL2/PTGS2/CXCL8/IL6
hsa04926	Relaxin signaling pathway	127	-0.424614	-1.62906	0.00222222	0.00777393	0.00388515	3380	tags=33%, list=18%, signal=27%	KRAS/GNB1/MAPK14/VEGFC/GNAI2/RELA/PIK3CA/COL4A6/COL1A1/PLCB4/COL4A2/GNAI3/CREB5/SMAD2/ADCY3/CREB1/SHC1/SHC2/VEGFA/ATF4/ACTA2/EDNRB/COL4A5/RXFP1/TGFBR2/ADCY8/RAF1/GNG11/VEGFB/ARRB1/GNA15/GNG4/NFKBIA/ADCY7/JUN/FOS/MMP2/MMP9/PIK3R1/COL3A1/ADCY2/COL1A2
hsa05206	MicroRNAs in cancer	171	-0.425318	-1.69838	0.00224215	0.00777393	0.00388515	2606	tags=36%, list=14%, signal=32%	CRKL/STAT3/APC/NOTCH1/CD44/CDC25B/KRAS/CASP3/GLS2/PIK3CA/BMPR2/BMI1/BCL2L11/CDKN1B/EP300/ROCK1/SIRT1/HDAC4/CCNE2/SPRY2/CCND1/HMOX1/NOTCH3/SHC1/MCL1/MDM2/CDKN2A/TPM1/FSCN1/PLAU/VEGFA/RPS6KA5/ABL1/HMGA2/NOTCH2/RASSF1/HOXD10/IRS2/MET/CDK6/RAF1/FOXP1/MIR21/PDGFRB/VIM/THBS1/CDKN1A/TIMP3/TP63/MMP9/CYP1B1/PIK3R1/RECK/MMP16/MARCKS/TGFB2/CCND2/PIM1/MYC/ZFPM2/TNC/PTGS2
hsa04623	Cytosolic DNA-sensing pathway	67	-0.435277	-1.49806	0.0184805	0.0398977	0.0199395	2325	tags=22%, list=12%, signal=20%	CASP3/IRF3/RELA/IL18/AIM2/PYCARD/CASP7/POLR3GL/CASP1/SAMHD1/CCL4/NFKBIA/IL1B/IL33/IL6
hsa04510	Focal adhesion	198	-0.436121	-1.78239	0.0022173	0.00777393	0.00388515	2065	tags=24%, list=11%, signal=22%	ARHGAP5/SHC2/BAD/VEGFA/ITGB8/LAMC1/FLNA/ZYX/ITGA3/FYN/FLT4/RAC2/THBS3/COL4A5/MET/PARVA/PDGFD/PPP1R12A/FN1/FLNB/PPP1R12B/RAF1/RELN/VEGFB/MYL9/CTNNB1/LAMA2/PDGFRB/EMP2/THBS4/THBS1/PGF/PAK3/JUN/ITGA1/BIRC3/PIK3R1/CAV1/EMP1/THBS2/CCND2/COL6A3/COMP/COL1A2/COL6A2/IGF1/VWF/TNC
hsa04512	ECM-receptor interaction	88	-0.438744	-1.58488	0.00215054	0.00777393	0.00388515	1878	tags=23%, list=10%, signal=21%	ITGB8/LAMC1/ITGA3/SV2B/THBS3/COL4A5/FN1/RELN/LAMA2/THBS4/THBS1/ITGA1/THBS2/COL6A3/COMP/COL1A2/COL6A2/CD36/VWF/TNC
hsa04062	Chemokine signaling pathway	185	-0.447983	-1.81232	0.00226244	0.00777393	0.00388515	3940	tags=34%, list=21%, signal=27%	PIK3R3/DOCK2/CCL5/PTK2/MAPK3/HCK/JAK2/STAT5B/CRKL/STAT3/CCL19/KRAS/GNB1/GNAQ/CXCR2/NCF1/GNAI2/LYN/RELA/PIK3CA/CCR7/CCL13/PLCB4/ROCK1/GNAI3/ADCY3/CCL18/SHC1/CXCL16/SHC2/BAD/FOXO3/GRK5/CCL11/ELMO1/CXCR4/RAC2/PF4/ADCY8/RAF1/GNG11/PIK3CG/ARRB1/GNG4/CCL4/CCR10/CCL28/NFKBIA/ADCY7/CCL3/PF4V1/TIAM1/PPBP/CXCL6/PIK3R1/CCL14/CXCL3/ADCY2/CCL8/CCL2/CXCL8/CXCL1/CXCL2
hsa04360	Axon guidance	179	-0.452617	-1.81826	0.0022779	0.00777393	0.00388515	3380	tags=35%, list=18%, signal=29%	KRAS/ROBO3/EPHB6/SEMA4B/WNT5A/GNAI2/PIK3CA/BMPR2/PPP3CA/SEMA6D/PARD6B/SEMA4F/ROCK1/ARHGEF12/GNAI3/NFATC3/SEMA4C/RYK/PLXNA3/PLXNA2/DPYSL2/PLXNC1/ABL1/NCK1/EPHA4/PPP3CC/SLIT2/FYN/CXCR4/RAC2/RND1/ENAH/MET/NRP1/UNC5C/SRGAP3/SRGAP2/BMPR1B/SRGAP1/RAF1/LIMK2/RGMA/MYL9/RRAS/PARD6G/EPHA2/NFATC2/TRPC1/ROBO1/EFNB2/PAK3/NTN1/SSH1/WNT5B/SEMA3C/NFATC4/BOC/PIK3R1/EPHA3/SLIT3/ABLIM2/BMP7
hsa05417	Lipid and atherosclerosis	206	-0.452672	-1.86108	0.00222222	0.00777393	0.00388515	3383	tags=32%, list=18%, signal=27%	HSPA1A/KRAS/TAB2/MAPK14/CASP3/IRF3/NCF1/LYN/NCF4/RELA/PIK3CA/DDIT3/PPP3CA/MAP3K7/SOD2/PLCB4/EIF2S1/ERN1/MIB2/SELP/IL18/TNFRSF10B/NFATC3/XBP1/PYCARD/BAD/TNFRSF10A/EIF2AK3/CASP7/VLDLR/ATF4/CYP1A1/ITPR1/HSPA6/MAP3K5/PPP3CC/TANK/FAS/TLR4/TNFRSF1A/CASP1/NFATC1/LDLR/NFATC2/NCF2/NFKBIA/VCAM1/CD40/CCL3/JUN/ABCG1/FOS/MMP9/IL1B/PIK3R1/CXCL3/LY96/MMP3/CCL2/SELE/ICAM1/CD36/CXCL8/IL6/CXCL1/CXCL2
hsa05166	Human T-cell leukemia virus 1 infection	218	-0.456781	-1.88312	0.00235294	0.00777393	0.00388515	3042	tags=32%, list=16%, signal=27%	RELA/PIK3CA/HLA-B/PPP3CA/HLA-C/MAP3K1/ITGB2/TBP/EP300/CCNE2/HLA-F/CREB5/SMAD2/ADCY3/HLA-DPB1/CCND1/CRTC3/HLA-DMB/HLA-DQA1/CREB1/NFATC3/CDKN2A/HLA-DRB1/MAP3K3/ATF4/CHEK2/SMAD3/PPP3CC/TSPO/IL15RA/MSX1/TCF3/TGFBR2/NRP1/HLA-DRA/HLA-DPA1/TGFB3/HLA-DMA/ETS1/FOSL1/ADCY8/TNFRSF1A/SRF/NFATC1/JAK1/IL1R1/CCNA1/ETS2/CDKN2C/NFATC2/NFYB/NFKBIA/ADCY7/CD40/CDKN1A/JUN/FOS/HLA-DQB1/ZFP36/EGR1/NFATC4/PIK3R1/EGR2/AD…
hsa05220	Chronic myeloid leukemia	75	-0.457873	-1.60909	0.00631579	0.0163725	0.0081824	3940	tags=39%, list=21%, signal=31%	PIK3R3/MAPK3/STAT5B/CRKL/KRAS/GADD45G/RELA/PIK3CA/CDKN1B/CCND1/SHC1/MDM2/CDKN2A/SHC2/BAD/ABL1/SMAD3/TGFBR2/TGFB3/CDK6/RAF1/GAB2/DDB2/NFKBIA/CDKN1A/PIK3R1/GADD45B/TGFB2/MYC
hsa04659	Th17 cell differentiation	104	-0.459519	-1.71546	0.00218818	0.00777393	0.00388515	2342	tags=27%, list=12%, signal=24%	SMAD2/HLA-DPB1/HLA-DMB/HLA-DQA1/NFATC3/HLA-DRB1/IFNGR2/SMAD3/PPP3CC/IFNGR1/TGFBR2/HLA-DRA/HLA-DPA1/HLA-DMA/NFKBIE/NFATC1/JAK1/IL1R1/AHR/NFATC2/NFKBIA/IL4R/IL1RAP/JUN/FOS/HLA-DQB1/IL1B/IL6
hsa01522	Endocrine resistance	95	-0.461184	-1.69178	0.0021645	0.00777393	0.00388515	2588	tags=32%, list=14%, signal=27%	SP1/RPS6KB1/NCOA3/ADCY3/CCND1/NOTCH3/SHC1/ESR2/MDM2/CDKN2A/SHC2/BAD/DLL1/MED1/NOTCH2/JAG2/ADCY8/RAF1/JAG1/CDKN2C/ADCY7/CDKN1A/JUN/FOS/HBEGF/MMP2/MMP9/PIK3R1/ADCY2/IGF1
hsa05221	Acute myeloid leukemia	66	-0.467095	-1.60134	0.00413223	0.0114144	0.00570455	3940	tags=38%, list=21%, signal=30%	PIK3R3/MAPK3/STAT5B/STAT3/KRAS/RELA/PIK3CA/LEF1/RPS6KB1/TCF7/TCF7L2/JUP/ZBTB16/CCND1/BAD/ITGAM/RAF1/TCF7L1/CCNA1/PER2/RUNX1T1/PIK3R1/PIM1/MYC/BCL2A1
hsa04380	Osteoclast differentiation	134	-0.471755	-1.83354	0.0021692	0.00777393	0.00388515	1722	tags=26%, list=9%, signal=24%	ITPR1/IFNGR2/FCGR2B/PPP3CC/FYN/IFNGR1/FCGR3B/TGFBR2/OSCAR/FOSL1/TNFRSF1A/SIRPA/JUND/TYROBP/CSF1/SYK/LCP2/NFATC1/JAK1/IL1R1/GAB2/NFATC2/NCF2/NFKBIA/FOSL2/JUN/FHL2/FOS/IL1B/PIK3R1/SOCS3/JUNB/TGFB2/CTSK/FOSB
hsa05205	Proteoglycans in cancer	199	-0.472815	-1.93501	0.00221239	0.00777393	0.00388515	2563	tags=30%, list=14%, signal=26%	ROCK1/RPS6KB1/ARHGEF12/SMAD2/MRAS/CCND1/IQGAP1/GPC1/WNT6/MDM2/PLAU/SDC2/VEGFA/HCLS1/FLNA/ITPR1/GPC3/HOXD10/MET/FAS/HSPB2/TLR4/PPP1R12A/FN1/WNT9A/FZD7/FGF2/FLNB/PPP1R12B/RAF1/FZD2/WNT2/RRAS/MIR21/CTNNB1/LUM/FZD1/PLCE1/FGFR1/DCN/THBS1/CDKN1A/TIMP3/PLAUR/TIAM1/WNT5B/HBEGF/MMP2/MMP9/PIK3R1/CAV1/TGFB2/MYC/WNT2B/COL1A2/IGF2/TWIST1/IGF1/TWIST2
hsa05323	Rheumatoid arthritis	87	-0.477099	-1.72201	0.00214133	0.00777393	0.00388515	2419	tags=36%, list=13%, signal=31%	CD86/HLA-DPB1/IL18/HLA-DMB/HLA-DQA1/TCIRG1/VEGFA/HLA-DRB1/HLA-DRA/TLR4/HLA-DPA1/TGFB3/HLA-DMA/CSF1/CCL3/JUN/FOS/HLA-DQB1/IL1B/CXCL6/CXCL3/TNFSF13B/TGFB2/MMP3/CCL2/ICAM1/CTSK/CXCL8/IL6/CXCL1/CXCL2
hsa04330	Notch signaling pathway	61	-0.477533	-1.62165	0.00406504	0.0113216	0.00565817	3751	tags=44%, list=20%, signal=36%	HEY2/APH1B/NOTCH1/RBPJ/ATXN1/DVL1/DTX3L/ADAM17/EP300/CIR1/NOTCH3/DVL2/DLL1/DTX3/NCOR2/MFNG/NOTCH2/TLE2/HEY1/JAG2/NUMBL/TLE4/JAG1/NRARP/TLE1/HES1/SPEN
hsa05224	Breast cancer	144	-0.480798	-1.88134	0.00219298	0.00777393	0.00388515	2588	tags=40%, list=14%, signal=34%	MAPK3/HEY2/WNT11/FZD10/APC/NOTCH1/KRAS/GADD45G/LRP6/DVL1/WNT5A/PIK3CA/LEF1/SP1/RPS6KB1/TCF7/TCF7L2/NCOA3/CCND1/NOTCH3/SHC1/ESR2/WNT6/DVL2/SHC2/DLL1/CSNK1A1/NOTCH2/FLT4/HEY1/JAG2/WNT9A/FZD7/PGR/FGF2/CDK6/RAF1/TCF7L1/JAG1/FZD2/WNT2/CTNNB1/DDB2/HES1/FGF7/FZD1/FGFR1/CDKN1A/JUN/FGF18/WNT5B/FOS/PIK3R1/GADD45B/MYC/WNT2B/IGF1
hsa04620	Toll-like receptor signaling pathway	101	-0.481757	-1.79291	0.00221239	0.00777393	0.00388515	821	tags=14%, list=4%, signal=13%	JAK1/CCL4/NFKBIA/CD40/CCL3/JUN/FOS/IL1B/PIK3R1/LY96/CTSK/MAP3K8/CXCL8/IL6
hsa04621	NOD-like receptor signaling pathway	175	-0.482031	-1.92386	0.00232558	0.00777393	0.00388515	2325	tags=23%, list=12%, signal=20%	IL18/AIM2/IFNAR1/PYCARD/ATG12/IFNAR2/MAP1LC3C/NOD1/NLRP1/ITPR1/PKN1/CARD8/TANK/TRAF5/CARD6/TLR4/TXNIP/CASP4/ANTXR2/CASP1/P2RX7/JAK1/NFKBIA/GBP1/JUN/BIRC3/IL1B/IFI16/ANTXR1/CXCL3/CARD16/GBP2/NAMPT/DEFA1/TNFAIP3/CCL2/CXCL8/IL6/CXCL1/CXCL2
hsa04550	Signaling pathways regulating pluripotency of stem cells	137	-0.484733	-1.88833	0.00215983	0.00777393	0.00388515	3807	tags=41%, list=20%, signal=33%	MAPK3/JAK2/WNT11/FZD10/STAT3/SMAD5/APC/PCGF2/KRAS/IL6ST/REST/MAPK14/DVL1/WNT5A/KAT6A/PIK3CA/BMPR2/BMI1/SMAD1/SKIL/TCF7/SMAD2/WNT6/DVL2/ID4/SMAD3/TCF3/WNT9A/FZD7/BMPR1B/FGF2/BMPR1A/RAF1/ID1/FZD2/WNT2/ID3/MEIS1/LIFR/JAK1/CTNNB1/LEFTY1/LIF/FZD1/SMAD9/FGFR1/BMP4/ID2/WNT5B/INHBA/PIK3R1/KLF4/INHBB/MYC/WNT2B/IGF1
hsa05171	Coronavirus disease - COVID-19	218	-0.495234	-2.04165	0.00235294	0.00777393	0.00388515	4419	tags=50%, list=24%, signal=39%	NFKB1/C4A/RPL8/RPS9/RPL29/RPS12/RPS6/RPL6/RPS29/RPS16/RPS24/RPL21/RPL19/RPL30/RPL22/FCGR2A/PIK3R3/RPS25/RPS10/RPL15/MX1/MAPK3/RPL10L/RPLP1/RPL24/RPL37A/RPS28/STAT3/RPL4/RPS11/RPL14/RPLP0/RPL38/RPL27/IL6ST/TAB2/MAPK14/RPS5/RPL32/RPSA/RPL37/IL6R/RPL13A/RPS17/IRF3/FAU/RELA/PIK3CA/RPS2/MAP3K7/C7/RPS27/RPS19/RPL11/RPLP2/ADAM17/RPS20/RPL12/RPL13/RSL24D1/SELP/RPL27A/RPL36A/RPL34/RPS8/IFNAR1/C2/MX2/IFNAR…
hsa05320	Autoimmune thyroid disease	47	-0.496979	-1.59972	0.0040404	0.0113216	0.00565817	3482	tags=34%, list=19%, signal=28%	HLA-E/HLA-G/HLA-B/HLA-C/HLA-F/CD86/HLA-DPB1/HLA-DMB/HLA-DQA1/HLA-DRB1/HLA-DRA/FAS/HLA-DPA1/HLA-DMA/CD40/HLA-DQB1
hsa04390	Hippo signaling pathway	148	-0.49703	-1.9505	0.00225734	0.00777393	0.00388515	3133	tags=37%, list=17%, signal=31%	DVL1/WNT5A/BMPR2/LEF1/ITGB2/SMAD1/BMP8A/PPP2R2A/PARD6B/TCF7/TCF7L2/CSNK1E/SMAD2/CCND1/SAV1/WNT6/TP53BP2/DVL2/DLG5/SMAD3/RASSF1/TGFBR2/PPP2CA/PPP2R2C/PRKCI/TGFB3/WTIP/WNT9A/FZD7/LATS2/BMPR1B/BMPR1A/TEAD4/ID1/TCF7L1/FZD2/WNT2/PARD6G/CTNNB1/GLI2/CRB2/FZD1/BMP4/ID2/WNT5B/BIRC3/FRMD6/SERPINE1/BMP2/TGFB2/CCND2/MYC/WNT2B/AREG/BMP7
hsa04340	Hedgehog signaling pathway	51	-0.502372	-1.65337	0.002	0.00777393	0.00388515	2489	tags=31%, list=13%, signal=27%	EFCAB7/CSNK1E/CCND1/CDON/SPOP/CSNK1A1/HHIP/SMURF2/EVC2/ARRB1/GLI2/EVC/BOC/SCUBE2/CCND2/GAS1
hsa05167	Kaposi sarcoma-associated herpesvirus infection	188	-0.503983	-2.04292	0.00226757	0.00777393	0.00388515	3380	tags=34%, list=18%, signal=28%	KRAS/GNB1/IL6ST/HLA-G/MAPK14/CASP3/IRF3/LYN/RELA/PIK3CA/LEF1/HLA-B/PPP3CA/HLA-C/EP300/TCF7/TCF7L2/HLA-F/CD86/CCND1/CREB1/NFATC3/IFNAR1/IFNAR2/MAP1LC3C/VEGFA/UBC/ITPR1/PPP3CC/IFNGR1/FAS/FGF2/CDK6/TNFRSF1A/MICA/RAF1/GNG11/TCF7L1/SYK/NFATC1/PIK3CG/JAK1/CTNNB1/GNG4/NFATC2/NFKBIA/CDKN1A/JUN/FOS/ZFP36/NFATC4/PIK3R1/CXCL3/MYC/CLEC2B/C3/ICAM1/ANGPT2/PTGS2/CXCL8/IL6/CXCL1/CXCL2
hsa04060	Cytokine-cytokine receptor interaction	283	-0.507637	-2.14377	0.00244499	0.00794212	0.0039692	1708	tags=21%, list=9%, signal=20%	IFNGR2/CCL11/IFNGR1/CXCR4/IL15RA/RELL1/NGF/PF4/TGFBR2/FAS/ACVRL1/TGFB3/TNFSF14/CSF2RB/BMPR1B/BMPR1A/TNFRSF1A/TNFRSF1B/IL13RA1/IL20RA/CSF1/OSMR/LIFR/IL11RA/IL10RB/IL1R1/LIF/CCL4/CCR10/CCL28/CD40/CCL3/PF4V1/IL4R/IL1RAP/BMP4/PPBP/INHBA/IL1RN/IL1B/CXCL6/CCL14/CXCL3/TSLP/IL17D/LEPR/BMP2/TNFSF13B/TGFB2/IL33/INHBB/ACKR3/CCL8/CCL2/ACKR4/BMP7/CXCL8/IL6/CXCL1/CXCL2
hsa05216	Thyroid cancer	37	-0.507779	-1.55805	0.0240964	0.0501264	0.0250515	3380	tags=41%, list=18%, signal=33%	KRAS/TPM3/PAX8/GADD45G/LEF1/TCF7/TCF7L2/CCND1/TPR/TCF7L1/CTNNB1/DDB2/CDKN1A/GADD45B/MYC
hsa05142	Chagas disease	100	-0.508241	-1.895	0.0021692	0.00777393	0.00388515	1739	tags=26%, list=9%, signal=24%	C1QB/IFNGR2/C1QC/IFNGR1/TGFBR2/PPP2CA/FAS/PPP2R2C/TLR4/TGFB3/C1QA/TNFRSF1A/GNA15/GNAL/NFKBIA/CCL3/JUN/FOS/IL1B/PIK3R1/SERPINE1/TGFB2/CCL2/C3/CXCL8/IL6
hsa04610	Complement and coagulation cascades	83	-0.509632	-1.8287	0.00210526	0.00777393	0.00388515	2144	tags=40%, list=11%, signal=35%	C2/VSIG4/PLAU/F10/C1QB/TFPI/ITGAM/C1QC/C1QA/MASP1/SERPIND1/C5AR1/CFHR2/F5/F2R/C5/FGA/CD55/C6/THBD/PLAUR/SERPING1/SERPINE1/F3/CFH/C1S/C3/PROCR/CFD/C1R/CLU/VWF/FGG
hsa04115	p53 signaling pathway	72	-0.510797	-1.77781	0.00211864	0.00777393	0.00388515	2475	tags=33%, list=13%, signal=29%	GORAB/CCNE2/SIVA1/CCND1/TNFRSF10B/MDM2/CDKN2A/TNFRSF10A/CHEK2/ZMAT3/FAS/CDK6/PMAIP1/SESN3/DDB2/RPRM/THBS1/CDKN1A/SERPINE1/SFN/GADD45B/CCND2/IGFBP3/IGF1
hsa04310	Wnt signaling pathway	167	-0.531643	-2.115	0.00229358	0.00777393	0.00388515	3719	tags=40%, list=20%, signal=32%	CTNND2/WNT11/SENP2/FZD10/PRICKLE2/APC/DKK1/SIAH1/DAAM1/LRP6/DVL1/WNT5A/LEF1/PPP3CA/MAP3K7/PLCB4/EP300/ROR2/SIRT1/TCF7/TCF7L2/CSNK1E/CCND1/NFATC3/WNT6/ROR1/DVL2/MCC/RYK/CSNK1A1/SMAD3/PPP3CC/LZTS2/TLE2/RAC2/DAAM2/SFRP1/WNT9A/FZD7/FOSL1/TCF7L1/TLE4/FZD2/APCDD1/WNT2/NFATC1/CTNNB1/TLE1/NFATC2/TBL1XR1/FZD1/FRZB/PRICKLE1/JUN/WNT5B/NFATC4/RSPO1/CCND2/SOX17/MYC/WNT2B/SERPINF1/WIF1/DKK2/RSPO3/SFRP2/SFRP4
hsa04933	AGE-RAGE signaling pathway in diabetic complications	99	-0.532521	-1.97975	0.00215517	0.00777393	0.00388515	3380	tags=41%, list=18%, signal=34%	KRAS/MAPK14/CASP3/VEGFC/PLCD3/RELA/PIK3CA/COL4A6/COL1A1/CDKN1B/PLCB4/COL4A2/SMAD2/CCND1/VEGFA/SMAD3/COL4A5/TGFBR2/TGFB3/FN1/VEGFB/NFATC1/THBD/PLCE1/VCAM1/JUN/MMP2/IL1B/EGR1/PIK3R1/SERPINE1/COL3A1/TGFB2/F3/PIM1/CCL2/SELE/COL1A2/ICAM1/CXCL8/IL6
hsa04625	C-type lectin receptor signaling pathway	101	-0.534472	-1.98909	0.00221239	0.00777393	0.00388515	2438	tags=31%, list=13%, signal=27%	ARHGEF12/MRAS/LSP1/NFATC3/MDM2/PYCARD/CLEC7A/ITPR1/PLK3/PPP3CC/CD209/BCL10/CASP1/RAF1/SYK/NFATC1/RRAS/NFATC2/NFKBIA/IRF1/JUN/BCL3/CLEC4M/IL1B/NFATC4/PIK3R1/IL17D/EGR2/EGR3/PTGS2/IL6
hsa05146	Amoebiasis	101	-0.535674	-1.99357	0.00221239	0.00777393	0.00388515	3270	tags=37%, list=17%, signal=30%	CASP3/GNAQ/LAMB2/RELA/PIK3CA/COL4A6/COL1A1/ITGB2/RAB5B/CD1C/PLCB4/LAMB1/COL4A2/CD1D/LAMC1/ITGAM/COL4A5/TLR4/TGFB3/FN1/SERPINB9/ARG1/GNA15/GNAL/IL1R1/LAMA2/RAB7B/IL1B/PIK3R1/CXCL3/COL3A1/TGFB2/COL1A2/CXCL8/IL6/CXCL1/CXCL2
hsa05321	Inflammatory bowel disease	62	-0.539841	-1.83193	0.00207039	0.00777393	0.00388515	2342	tags=39%, list=12%, signal=34%	IL12RB1/RELA/IL18RAP/SMAD2/HLA-DPB1/IL18/HLA-DMB/HLA-DQA1/HLA-DRB1/IFNGR2/SMAD3/IFNGR1/HLA-DRA/TLR4/HLA-DPA1/TGFB3/HLA-DMA/NFATC1/IL4R/JUN/HLA-DQB1/IL1B/TGFB2/IL6
hsa04940	Type I diabetes mellitus	40	-0.542021	-1.67468	0.00204499	0.00777393	0.00388515	3482	tags=45%, list=19%, signal=37%	HLA-E/HLA-G/HLA-B/HLA-C/HLA-F/CD86/HLA-DPB1/HLA-DMB/HLA-DQA1/PTPRN2/HLA-DRB1/HLA-DRA/FAS/HLA-DPA1/HLA-DMA/HLA-DQB1/IL1B/CPE
hsa05134	Legionellosis	55	-0.552642	-1.82421	0.00205761	0.00777393	0.00388515	3448	tags=42%, list=18%, signal=34%	APAF1/HSPA1A/CLK1/CASP3/ARF1/RELA/HBS1L/ITGB2/IL18/PYCARD/CASP7/HSPA6/ITGAM/TLR4/CASP1/NFKBIA/IL1B/CXCL3/C3/CXCL8/IL6/CXCL1/CXCL2
hsa05150	Staphylococcus aureus infection	82	-0.55376	-1.97973	0.00210084	0.00777393	0.00388515	2564	tags=35%, list=14%, signal=31%	KRT13/SELP/HLA-DPB1/HLA-DMB/HLA-DQA1/C2/HLA-DRB1/C1QB/FCGR2B/ITGAM/C1QC/FCGR3B/HLA-DRA/HLA-DPA1/C1QA/HLA-DMA/MASP1/C5AR1/C5/HLA-DQB1/KRT19/DEFA1/CFH/C1S/C3/ICAM1/CFD/C1R/FGG
hsa05140	Leishmaniasis	73	-0.557894	-1.94667	0.00210526	0.00777393	0.00388515	3308	tags=42%, list=18%, signal=35%	TAB2/MAPK14/NCF1/NCF4/RELA/MAP3K7/ITGB2/HLA-DPB1/HLA-DMB/HLA-DQA1/MARCKSL1/HLA-DRB1/IFNGR2/ITGAM/IFNGR1/FCGR3B/HLA-DRA/TLR4/HLA-DPA1/TGFB3/HLA-DMA/JAK1/NCF2/NFKBIA/JUN/FOS/HLA-DQB1/IL1B/TGFB2/C3/PTGS2
hsa05416	Viral myocarditis	55	-0.560321	-1.84956	0.00205761	0.00777393	0.00388515	3966	tags=56%, list=21%, signal=45%	DMD/ACTB/BID/HLA-E/HLA-G/CASP3/HLA-B/HLA-C/ITGB2/SGCD/HLA-F/CD86/HLA-DPB1/CCND1/HLA-DMB/HLA-DQA1/HLA-DRB1/ABL2/ABL1/FYN/RAC2/HLA-DRA/HLA-DPA1/HLA-DMA/LAMA2/CD55/CD40/HLA-DQB1/CAV1/SGCG/ICAM1
hsa05202	Transcriptional misregulation in cancer	168	-0.563923	-2.24728	0.00226244	0.00777393	0.00388515	3485	tags=43%, list=19%, signal=36%	ZBTB17/MLF1/LDB1/NGFR/PAX8/KLF3/EYA1/GADD45G/HOXA10/RELA/DDIT3/SIN3A/BMI1/SMAD1/CDKN1B/CCNT1/DDX5/TLX3/SP1/PBX1/JUP/CD86/ZBTB16/MLLT1/EWSR1/FLI1/MDM2/FUT8/PLAU/ATF1/DOT1L/JMJD1C/ITGAM/HMGA2/TCF3/HHEX/TGFBR2/MEF2C/MET/ARNT2/KMT2A/ERG/PBX3/HOXA11/MEIS1/CCNA1/PER2/CDKN2C/DDB2/REL/CD40/NR4A3/CDKN1A/NUPR1/ID2/MLLT3/RUNX1T1/BIRC3/MMP9/BCL6/DEFA1/GADD45B/WT1/CCND2/CEBPB/IGFBP3/MYC/BCL2A1/MMP3/NFKBIZ/IGF…
hsa05143	African trypanosomiasis	35	-0.573432	-1.73309	0.0040404	0.0113216	0.00565817	1340	tags=26%, list=7%, signal=24%	FAS/IDO1/APOL1/VCAM1/IL1B/HBA1/SELE/ICAM1/IL6
hsa04672	Intestinal immune network for IgA production	44	-0.587925	-1.86598	0.00199203	0.00777393	0.00388515	2419	tags=36%, list=13%, signal=32%	CD86/HLA-DPB1/HLA-DMB/HLA-DQA1/HLA-DRB1/CXCR4/IL15RA/HLA-DRA/HLA-DPA1/HLA-DMA/CCR10/CCL28/CD40/HLA-DQB1/TNFSF13B/IL6
hsa05310	Asthma	27	-0.588568	-1.70415	0.00817996	0.020572	0.0102812	2693	tags=41%, list=14%, signal=35%	FCER1G/HLA-DPB1/HLA-DMB/HLA-DQA1/HLA-DRB1/CCL11/HLA-DRA/HLA-DPA1/HLA-DMA/CD40/HLA-DQB1
hsa04064	NF-kappa B signaling pathway	100	-0.592575	-2.20944	0.0021692	0.00777393	0.00388515	1342	tags=24%, list=7%, signal=22%	TRAF5/TLR4/TNFSF14/BCL10/TNFRSF1A/SYK/IL1R1/CCL4/NFKBIA/VCAM1/CD40/BIRC3/IL1B/CXCL3/TNFSF13B/LY96/GADD45B/TNFAIP3/BCL2A1/ICAM1/PTGS2/CXCL8/CXCL1/CXCL2
hsa05217	Basal cell carcinoma	61	-0.592718	-2.01281	0.00203252	0.00777393	0.00388515	3682	tags=46%, list=20%, signal=37%	WNT11/FZD10/APC/KIF7/GADD45G/DVL1/WNT5A/LEF1/TCF7/TCF7L2/WNT6/DVL2/HHIP/WNT9A/FZD7/TCF7L1/FZD2/WNT2/CTNNB1/GLI2/DDB2/FZD1/CDKN1A/BMP4/WNT5B/BMP2/GADD45B/WNT2B
hsa05133	Pertussis	72	-0.595878	-2.07394	0.00211864	0.00777393	0.00388515	3294	tags=42%, list=18%, signal=34%	MAPK14/CASP3/IRF3/GNAI2/RELA/ITGB2/GNAI3/C2/PYCARD/NOD1/CASP7/C1QB/ITGAM/C1QC/TLR4/C1QA/CASP1/C5/IRF1/JUN/SERPING1/FOS/IL1B/CXCL6/LY96/C1S/C3/C1R/CXCL8/IL6
hsa05330	Allograft rejection	34	-0.60309	-1.80202	0.00205761	0.00777393	0.00388515	3482	tags=56%, list=19%, signal=46%	HLA-DOB/IL4/PRF1/HLA-E/HLA-G/HLA-B/HLA-C/HLA-F/CD86/HLA-DPB1/HLA-DMB/HLA-DQA1/HLA-DRB1/HLA-DRA/FAS/HLA-DPA1/HLA-DMA/CD40/HLA-DQB1
hsa05332	Graft-versus-host disease	38	-0.604512	-1.85668	0.00202429	0.00777393	0.00388515	3482	tags=45%, list=19%, signal=37%	HLA-E/HLA-G/HLA-B/HLA-C/HLA-F/CD86/HLA-DPB1/HLA-DMB/HLA-DQA1/HLA-DRB1/HLA-DRA/FAS/HLA-DPA1/HLA-DMA/HLA-DQB1/IL1B/IL6
hsa04350	TGF-beta signaling pathway	103	-0.618296	-2.30647	0.00220264	0.00777393	0.00388515	3038	tags=46%, list=16%, signal=38%	BMPR2/SIN3A/SMAD1/BMP8A/GREM2/SKIL/EP300/SP1/ROCK1/LRRC32/RPS6KB1/SMAD2/TGIF2/ID4/SMAD3/TGFBR2/SKI/PPP2CA/TGFB3/SMURF2/ZFYVE16/BMPR1B/BMPR1A/THSD4/ID1/TGIF1/ID3/EMP3/RGMA/LEFTY1/SMAD9/LTBP1/DCN/THBS1/BMP4/ID2/NBL1/INHBA/BMP2/TGFB2/GREM1/INHBB/MYC/FBN1/FST/FMOD/BMP7
hsa04657	IL-17 signaling pathway	93	-0.632372	-2.31395	0.00214592	0.00777393	0.00388515	1674	tags=27%, list=9%, signal=25%	CCL11/USP25/TRAF5/S100A9/FOSL1/JUND/NFKBIA/JUN/FOS/MMP9/IL1B/CXCL6/CXCL3/IL17D/CEBPB/TNFAIP3/S100A8/MMP3/CCL2/FOSB/PTGS2/CXCL8/IL6/CXCL1/CXCL2
hsa04061	Viral protein interaction with cytokine and cytokine receptor	95	-0.643049	-2.35892	0.0021645	0.00777393	0.00388515	2325	tags=33%, list=12%, signal=29%	IL18/CCL18/TNFRSF10D/TNFRSF10B/TNFRSF10A/CCL11/CXCR4/PF4/TNFSF14/TNFRSF1A/TNFRSF1B/IL20RA/CSF1/IL10RB/CCL4/CCR10/CCL28/CCL3/PF4V1/PPBP/CXCL6/CCL14/CXCL3/ACKR3/CCL8/CCL2/ACKR4/CXCL8/IL6/CXCL1/CXCL2
hsa04668	TNF signaling pathway	112	-0.64653	-2.43641	0.00222222	0.00777393	0.00388515	1817	tags=32%, list=10%, signal=29%	RPS6KA5/CASP7/ATF4/MAP3K5/TRAF5/FAS/TNFRSF1A/TNFRSF1B/JAG1/CSF1/LIF/NFKBIA/VCAM1/IRF1/JUN/BCL3/BIRC3/FOS/MMP9/IL1B/CXCL6/PIK3R1/CXCL3/SOCS3/JUNB/CEBPB/TNFAIP3/MMP3/CCL2/SELE/ICAM1/PTGS2/MAP3K8/IL6/CXCL1/CXCL2
hsa05322	Systemic lupus erythematosus	49	-0.662133	-2.15902	0.00201613	0.00777393	0.00388515	2419	tags=43%, list=13%, signal=37%	CD86/HLA-DPB1/HLA-DMB/HLA-DQA1/C2/HLA-DRB1/C1QB/C1QC/FCGR3B/HLA-DRA/HLA-DPA1/C1QA/HLA-DMA/C5/C6/CD40/GRIN2A/HLA-DQB1/C1S/C3/C1R
hsa05144	Malaria	48	-0.728251	-2.36013	0.00203252	0.00777393	0.00388515	1518	tags=46%, list=8%, signal=42%	THBS3/MET/TLR4/TGFB3/LRP1/VCAM1/CD40/THBS4/THBS1/IL1B/HBA1/PECAM1/THBS2/TGFB2/COMP/CCL2/SELE/ICAM1/ACKR1/CD36/CXCL8/IL6
