# Supplementary material for: Acyl-CoA thioesterase 13 (ACOT13) attenuates the progression of autosomal dominant polycystic kidney disease in vitro via triggering mitochondrial-related cell apoptosis
Source: Aging (Albany NY). 2024 Aug 21;16(16):11877–92. doi: 10.18632/aging.206054 (PMC11386924; doi:10.18632/aging.206054)
Supplement: Supplementary Table 3 [file aging-16-206054-s004.xlsx]

## Sheet: GO-enrich
Supplementary Table 3. GO and KEGG analyses of mitochondria-associated DEGs between H- and L-ACOT13 groups.
ONTOLOGY	ID	Description	GeneRatio	BgRatio	pvalue	p.adjust	qvalue	geneID	Count
BP	GO:0046395	carboxylic acid catabolic process	23/52	238/18800	1.96395e-30	1.03461e-27	7.01974e-28	ECHS1/FABP1/ALDH1L1/ALDH1L2/ACAT1/AGXT2/PCCA/PCCB/PCK2/ALDH6A1/ALDH4A1/ACAA2/ABAT/GLS/HOGA1/MCCC2/ACADSB/HADH/PHYH/AMACR/HIBCH/PRODH2/EHHADH	23
BP	GO:0016054	organic acid catabolic process	23/52	242/18800	2.91849e-30	1.03461e-27	7.01974e-28	ECHS1/FABP1/ALDH1L1/ALDH1L2/ACAT1/AGXT2/PCCA/PCCB/PCK2/ALDH6A1/ALDH4A1/ACAA2/ABAT/GLS/HOGA1/MCCC2/ACADSB/HADH/PHYH/AMACR/HIBCH/PRODH2/EHHADH	23
BP	GO:0044282	small molecule catabolic process	24/52	376/18800	2.06225e-27	4.87379e-25	3.30684e-25	ECHS1/FABP1/ALDH1L1/ALDH1L2/ACAT1/AGXT2/PCCA/PCCB/PCK2/ALDH6A1/ALDH4A1/ACAA2/ABAT/GLS/HOGA1/MCCC2/CYP27B1/ACADSB/HADH/PHYH/AMACR/HIBCH/PRODH2/EHHADH	24
BP	GO:0072329	monocarboxylic acid catabolic process	14/52	124/18800	1.98646e-19	3.521e-17	2.38898e-17	ECHS1/FABP1/ALDH1L2/ACAT1/AGXT2/PCCA/PCCB/PCK2/ACAA2/HOGA1/HADH/PHYH/AMACR/EHHADH	14
BP	GO:0006631	fatty acid metabolic process	18/52	395/18800	9.62389e-18	1.36467e-15	9.25919e-16	HAO2/ECHS1/FABP1/ALDH1L2/ACAT1/PCCA/PCCB/PCK2/ECHDC3/ACAA2/ACOT7/ACSM3/ACSL1/ACADSB/HADH/PHYH/AMACR/EHHADH	18
BP	GO:0006520	cellular amino acid metabolic process	16/52	285/18800	3.24206e-17	3.83104e-15	2.59934e-15	ECHS1/ACAT1/AGXT2/MSRA/ALDH6A1/ALDH4A1/GLYAT/ABAT/GLS/HOGA1/AGMAT/BPHL/MCCC2/ACADSB/HIBCH/PRODH2	16
BP	GO:0009062	fatty acid catabolic process	12/52	102/18800	5.75794e-17	5.83197e-15	3.95696e-15	ECHS1/FABP1/ALDH1L2/ACAT1/PCCA/PCCB/PCK2/ACAA2/HADH/PHYH/AMACR/EHHADH	12
BP	GO:0009063	cellular amino acid catabolic process	12/52	112/18800	1.84569e-16	1.63574e-14	1.10984e-14	ECHS1/ACAT1/AGXT2/ALDH6A1/ALDH4A1/ABAT/GLS/HOGA1/MCCC2/ACADSB/HIBCH/PRODH2	12
BP	GO:1901605	alpha-amino acid metabolic process	13/52	203/18800	8.08655e-15	6.37041e-13	4.32229e-13	ACAT1/AGXT2/MSRA/ALDH6A1/ALDH4A1/GLYAT/GLS/HOGA1/AGMAT/MCCC2/ACADSB/HIBCH/PRODH2	13
BP	GO:1901606	alpha-amino acid catabolic process	10/52	94/18800	7.94982e-14	5.63642e-12	3.82428e-12	ACAT1/AGXT2/ALDH6A1/ALDH4A1/GLS/HOGA1/MCCC2/ACADSB/HIBCH/PRODH2	10
BP	GO:0019395	fatty acid oxidation	10/52	106/18800	2.7331e-13	1.7616e-11	1.19524e-11	HAO2/ECHS1/FABP1/ALDH1L2/ACAT1/ACAA2/HADH/PHYH/AMACR/EHHADH	10
BP	GO:0034440	lipid oxidation	10/52	112/18800	4.7968e-13	2.83411e-11	1.92293e-11	HAO2/ECHS1/FABP1/ALDH1L2/ACAT1/ACAA2/HADH/PHYH/AMACR/EHHADH	10
BP	GO:0044242	cellular lipid catabolic process	12/52	219/18800	6.32204e-13	3.44794e-11	2.33941e-11	ECHS1/FABP1/ALDH1L2/ACAT1/PCCA/PCCB/PCK2/ACAA2/HADH/PHYH/AMACR/EHHADH	12
BP	GO:0016042	lipid catabolic process	13/52	327/18800	3.63041e-12	1.83854e-10	1.24744e-10	ECHS1/FABP1/ALDH1L2/ACAT1/PCCA/PCCB/PCK2/ACAA2/CYP27B1/HADH/PHYH/AMACR/EHHADH	13
BP	GO:0043648	dicarboxylic acid metabolic process	9/52	95/18800	4.48599e-12	2.12038e-10	1.43866e-10	ALDH1L1/ALDH1L2/PCK2/ALDH4A1/GLS/HOGA1/PHYH/IDH2/PRODH2	9
BP	GO:0030258	lipid modification	11/52	216/18800	1.42649e-11	6.32113e-10	4.28885e-10	HAO2/ECHS1/FABP1/ALDH1L2/ACAT1/ACAA2/HADH/PHYH/EPHX2/AMACR/EHHADH	11
BP	GO:0009083	branched-chain amino acid catabolic process	6/52	21/18800	1.74706e-11	7.28628e-10	4.9437e-10	ECHS1/ACAT1/ALDH6A1/MCCC2/ACADSB/HIBCH	6
BP	GO:0006635	fatty acid beta-oxidation	8/52	76/18800	3.18645e-11	1.25511e-09	8.51584e-10	ECHS1/FABP1/ALDH1L2/ACAT1/ACAA2/HADH/AMACR/EHHADH	8
BP	GO:0009081	branched-chain amino acid metabolic process	6/52	25/18800	5.65414e-11	2.10989e-09	1.43155e-09	ECHS1/ACAT1/ALDH6A1/MCCC2/ACADSB/HIBCH	6
BP	GO:0042219	cellular modified amino acid catabolic process	5/52	32/18800	2.52915e-08	8.96582e-07	6.08326e-07	ALDH1L1/ALDH1L2/DMGDH/ALDH4A1/HOGA1	5
BP	GO:0033865	nucleoside bisphosphate metabolic process	7/52	125/18800	5.06207e-08	1.50743e-06	1.02278e-06	ACAT1/GLYAT/ACOT7/MPC2/ACSM3/MCCC2/ACSL1	7
BP	GO:0033875	ribonucleoside bisphosphate metabolic process	7/52	125/18800	5.06207e-08	1.50743e-06	1.02278e-06	ACAT1/GLYAT/ACOT7/MPC2/ACSM3/MCCC2/ACSL1	7
BP	GO:0034032	purine nucleoside bisphosphate metabolic process	7/52	125/18800	5.06207e-08	1.50743e-06	1.02278e-06	ACAT1/GLYAT/ACOT7/MPC2/ACSM3/MCCC2/ACSL1	7
BP	GO:0046459	short-chain fatty acid metabolic process	4/52	14/18800	5.10271e-08	1.50743e-06	1.02278e-06	PCCA/PCCB/PCK2/PHYH	4
BP	GO:0006637	acyl-CoA metabolic process	6/52	93/18800	2.10967e-07	5.75292e-06	3.90332e-06	ACAT1/GLYAT/ACOT7/MPC2/ACSM3/ACSL1	6
BP	GO:0035383	thioester metabolic process	6/52	93/18800	2.10967e-07	5.75292e-06	3.90332e-06	ACAT1/GLYAT/ACOT7/MPC2/ACSM3/ACSL1	6
BP	GO:0009150	purine ribonucleotide metabolic process	9/52	366/18800	6.40136e-07	1.68095e-05	1.14052e-05	ACAT1/GLYAT/ACOT7/MPC2/AK4/ACSM3/MCCC2/ACSL1/DHTKD1	9
BP	GO:0006091	generation of precursor metabolites and energy	10/52	494/18800	8.42082e-07	2.13227e-05	1.44674e-05	ALDH1L1/ALDH1L2/ACAT1/DMGDH/ALDH4A1/DHRS2/AK4/MTFR1/IDH2/DHTKD1	10
BP	GO:0009259	ribonucleotide metabolic process	9/52	384/18800	9.54304e-07	2.33311e-05	1.583e-05	ACAT1/GLYAT/ACOT7/MPC2/AK4/ACSM3/MCCC2/ACSL1/DHTKD1	9
BP	GO:0006163	purine nucleotide metabolic process	9/52	394/18800	1.18081e-06	2.70062e-05	1.83235e-05	ACAT1/GLYAT/ACOT7/MPC2/AK4/ACSM3/MCCC2/ACSL1/DHTKD1	9
BP	GO:0019693	ribose phosphate metabolic process	9/52	394/18800	1.18081e-06	2.70062e-05	1.83235e-05	ACAT1/GLYAT/ACOT7/MPC2/AK4/ACSM3/MCCC2/ACSL1/DHTKD1	9
BP	GO:0072521	purine-containing compound metabolic process	9/52	416/18800	1.84834e-06	4.09522e-05	2.77858e-05	ACAT1/GLYAT/ACOT7/MPC2/AK4/ACSM3/MCCC2/ACSL1/DHTKD1	9
BP	GO:0006739	NADP metabolic process	4/52	37/18800	3.21216e-06	6.90127e-05	4.68247e-05	ALDH1L1/ALDH1L2/IDH2/DCXR	4
BP	GO:0009117	nucleotide metabolic process	9/52	487/18800	6.66742e-06	0.000139035	9.43347e-05	ACAT1/GLYAT/ACOT7/MPC2/AK4/ACSM3/MCCC2/ACSL1/DHTKD1	9
BP	GO:0006753	nucleoside phosphate metabolic process	9/52	495/18800	7.60182e-06	0.000153991	0.000104482	ACAT1/GLYAT/ACOT7/MPC2/AK4/ACSM3/MCCC2/ACSL1/DHTKD1	9
BP	GO:0006575	cellular modified amino acid metabolic process	6/52	188/18800	1.28257e-05	0.000252595	0.000171384	ALDH1L1/ALDH1L2/DMGDH/ALDH4A1/CHDH/HOGA1	6
BP	GO:0015936	coenzyme A metabolic process	3/52	18/18800	1.58157e-05	0.000303063	0.000205627	ACAT1/ACOT7/MCCC2	3
BP	GO:0033866	nucleoside bisphosphate biosynthetic process	4/52	60/18800	2.26288e-05	0.000401096	0.000272141	ACAT1/ACOT7/MPC2/ACSL1	4
BP	GO:0034030	ribonucleoside bisphosphate biosynthetic process	4/52	60/18800	2.26288e-05	0.000401096	0.000272141	ACAT1/ACOT7/MPC2/ACSL1	4
BP	GO:0034033	purine nucleoside bisphosphate biosynthetic process	4/52	60/18800	2.26288e-05	0.000401096	0.000272141	ACAT1/ACOT7/MPC2/ACSL1	4
BP	GO:0046394	carboxylic acid biosynthetic process	7/52	316/18800	2.4805e-05	0.000428946	0.000291037	AGXT2/ABAT/GLS/ACOT7/HOGA1/ACSM3/AMACR	7
BP	GO:0016053	organic acid biosynthetic process	7/52	318/18800	2.58271e-05	0.000435987	0.000295815	AGXT2/ABAT/GLS/ACOT7/HOGA1/ACSM3/AMACR	7
BP	GO:0006790	sulfur compound metabolic process	7/52	339/18800	3.88228e-05	0.000640125	0.000434322	ACAT1/MSRA/GLYAT/ACOT7/MPC2/ACSM3/ACSL1	7
BP	GO:0009065	glutamine family amino acid catabolic process	3/52	27/18800	5.57042e-05	0.000897597	0.000609015	ALDH4A1/GLS/PRODH2	3
BP	GO:0009064	glutamine family amino acid metabolic process	4/52	78/18800	6.38077e-05	0.00100533	0.000682108	ALDH4A1/GLS/AGMAT/PRODH2	4
BP	GO:0009152	purine ribonucleotide biosynthetic process	5/52	170/18800	0.000105057	0.00161924	0.00109865	ACAT1/ACOT7/MPC2/AK4/ACSL1	5
BP	GO:0006536	glutamate metabolic process	3/52	34/18800	0.000112414	0.00169577	0.00115057	ALDH4A1/GLS/PRODH2	3
BP	GO:0009260	ribonucleotide biosynthetic process	5/52	184/18800	0.000152265	0.00224908	0.00152599	ACAT1/ACOT7/MPC2/AK4/ACSL1	5
BP	GO:0046390	ribose phosphate biosynthetic process	5/52	191/18800	0.000181232	0.00262231	0.00177922	ACAT1/ACOT7/MPC2/AK4/ACSL1	5
BP	GO:0006164	purine nucleotide biosynthetic process	5/52	192/18800	0.000185691	0.0026331	0.00178654	ACAT1/ACOT7/MPC2/AK4/ACSL1	5
BP	GO:0006576	cellular biogenic amine metabolic process	4/52	105/18800	0.000202387	0.00281358	0.001909	DMGDH/CHDH/ABAT/AGMAT	4
BP	GO:0006090	pyruvate metabolic process	4/52	106/18800	0.000209896	0.00286185	0.00194175	PCK2/HOGA1/MPC2/DHTKD1	4
BP	GO:0072522	purine-containing compound biosynthetic process	5/52	202/18800	0.000235044	0.00314427	0.00213337	ACAT1/ACOT7/MPC2/AK4/ACSL1	5
BP	GO:0008202	steroid metabolic process	6/52	323/18800	0.000257005	0.0033033	0.00224127	ACAT1/ACAA2/DHRS2/CYP27B1/EPHX2/AMACR	6
BP	GO:0035384	thioester biosynthetic process	3/52	45/18800	0.00026091	0.0033033	0.00224127	ACAT1/MPC2/ACSL1	3
BP	GO:0071616	acyl-CoA biosynthetic process	3/52	45/18800	0.00026091	0.0033033	0.00224127	ACAT1/MPC2/ACSL1	3
BP	GO:0044106	cellular amine metabolic process	4/52	116/18800	0.00029644	0.0036873	0.00250182	DMGDH/CHDH/ABAT/AGMAT	4
BP	GO:0006560	proline metabolic process	2/52	10/18800	0.000332913	0.00406958	0.00276119	ALDH4A1/PRODH2	2
BP	GO:0009308	amine metabolic process	4/52	121/18800	0.000348157	0.00418379	0.00283868	DMGDH/CHDH/ABAT/AGMAT	4
BP	GO:1901361	organic cyclic compound catabolic process	7/52	494/18800	0.000398592	0.00471003	0.00319573	ALDH1L1/ALDH1L2/ACAT1/ALDH6A1/ACOT7/CYP27B1/EPHX2	7
BP	GO:0015937	coenzyme A biosynthetic process	2/52	11/18800	0.000406173	0.00472093	0.00320313	ACAT1/ACOT7	2
BP	GO:0030656	regulation of vitamin metabolic process	2/52	12/18800	0.000486545	0.00547557	0.00371514	CLYBL/CYP27B1	2
BP	GO:0033540	fatty acid beta-oxidation using acyl-CoA oxidase	2/52	12/18800	0.000486545	0.00547557	0.00371514	AMACR/EHHADH	2
BP	GO:0046185	aldehyde catabolic process	2/52	13/18800	0.00057399	0.00635874	0.00431437	AGXT2/HOGA1	2
BP	GO:0009636	response to toxic substance	5/52	247/18800	0.000590529	0.00644131	0.00437039	FABP1/GLYAT/DHRS2/BPHL/EPHX2	5
BP	GO:0009165	nucleotide biosynthetic process	5/52	255/18800	0.000682026	0.00732661	0.00497107	ACAT1/ACOT7/MPC2/AK4/ACSL1	5
BP	GO:1901293	nucleoside phosphate biosynthetic process	5/52	257/18800	0.000706474	0.00747597	0.00507241	ACAT1/ACOT7/MPC2/AK4/ACSL1	5
BP	GO:0050796	regulation of insulin secretion	4/52	147/18800	0.000725807	0.00756761	0.00513458	PCK2/ABAT/MPC2/HADH	4
BP	GO:1902652	secondary alcohol metabolic process	4/52	149/18800	0.000763438	0.0078446	0.00532252	ACAA2/CYP27B1/EPHX2/IDH2	4
BP	GO:0006081	cellular aldehyde metabolic process	3/52	66/18800	0.000807662	0.00818046	0.0055504	AGXT2/HOGA1/IDH2	3
BP	GO:0032024	positive regulation of insulin secretion	3/52	67/18800	0.000843877	0.00842688	0.0057176	PCK2/ABAT/MPC2	3
BP	GO:0006544	glycine metabolic process	2/52	16/18800	0.000878383	0.00864963	0.00586873	AGXT2/GLYAT	2
BP	GO:0006103	2-oxoglutarate metabolic process	2/52	17/18800	0.00099374	0.00939416	0.00637388	PHYH/IDH2	2
BP	GO:0006577	amino-acid betaine metabolic process	2/52	17/18800	0.00099374	0.00939416	0.00637388	DMGDH/CHDH	2
BP	GO:1901569	fatty acid derivative catabolic process	2/52	17/18800	0.00099374	0.00939416	0.00637388	ACAT1/ACOT7	2
BP	GO:0006085	acetyl-CoA biosynthetic process	2/52	18/18800	0.00111598	0.0101097	0.0068594	ACAT1/MPC2	2
BP	GO:0006740	NADPH regeneration	2/52	18/18800	0.00111598	0.0101097	0.0068594	ALDH1L1/ALDH1L2	2
BP	GO:0043649	dicarboxylic acid catabolic process	2/52	18/18800	0.00111598	0.0101097	0.0068594	ALDH1L1/ALDH1L2	2
BP	GO:1901568	fatty acid derivative metabolic process	3/52	74/18800	0.00112647	0.0101097	0.0068594	ACAT1/ACOT7/ACSL1	3
BP	GO:0008652	cellular amino acid biosynthetic process	3/52	76/18800	0.00121689	0.0107847	0.00731736	AGXT2/ABAT/GLS	3
BP	GO:0046653	tetrahydrofolate metabolic process	2/52	20/18800	0.00138096	0.0120877	0.00820143	ALDH1L1/ALDH1L2	2
BP	GO:0044270	cellular nitrogen compound catabolic process	6/52	449/18800	0.00144242	0.0123483	0.00837825	ALDH1L1/ALDH1L2/ACAT1/DMGDH/ALDH6A1/ACOT7	6
BP	GO:0090276	regulation of peptide hormone secretion	4/52	177/18800	0.00144557	0.0123483	0.00837825	PCK2/ABAT/MPC2/HADH	4
BP	GO:0030073	insulin secretion	4/52	179/18800	0.00150648	0.0127154	0.00862732	PCK2/ABAT/MPC2/HADH	4
BP	GO:0002791	regulation of peptide secretion	4/52	180/18800	0.00153759	0.0128253	0.00870192	PCK2/ABAT/MPC2/HADH	4
BP	GO:0090087	regulation of peptide transport	4/52	183/18800	0.00163363	0.0134679	0.00913792	PCK2/ABAT/MPC2/HADH	4
BP	GO:0009060	aerobic respiration	4/52	187/18800	0.00176807	0.0144088	0.00977628	AK4/MTFR1/IDH2/DHTKD1	4
BP	GO:1990542	mitochondrial transmembrane transport	3/52	87/18800	0.00179597	0.0144095	0.00977675	SFXN2/SLC25A37/MPC2	3
BP	GO:0015849	organic acid transport	5/52	318/18800	0.0018192	0.0144095	0.00977675	SFXN2/FABP1/ABAT/MPC2/ACSL1	5
BP	GO:0097164	ammonium ion metabolic process	2/52	23/18800	0.00182913	0.0144095	0.00977675	DMGDH/CHDH	2
BP	GO:0090277	positive regulation of peptide hormone secretion	3/52	91/18800	0.00204251	0.0159136	0.0107973	PCK2/ABAT/MPC2	3
BP	GO:0035336	long-chain fatty-acyl-CoA metabolic process	2/52	25/18800	0.00216127	0.0165683	0.0112415	ACOT7/ACSL1	2
BP	GO:0002793	positive regulation of peptide secretion	3/52	93/18800	0.00217328	0.0165683	0.0112415	PCK2/ABAT/MPC2	3
BP	GO:0010817	regulation of hormone levels	6/52	496/18800	0.00238281	0.0179725	0.0121942	PCK2/ABAT/DHRS2/MPC2/CYP27B1/HADH	6
BP	GO:0062012	regulation of small molecule metabolic process	5/52	342/18800	0.00249598	0.0186279	0.0126389	FABP1/CLYBL/AK4/CYP27B1/EPHX2	5
BP	GO:0006760	folic acid-containing compound metabolic process	2/52	28/18800	0.00270881	0.0197994	0.0134338	ALDH1L1/ALDH1L2	2
BP	GO:0042402	cellular biogenic amine catabolic process	2/52	28/18800	0.00270881	0.0197994	0.0134338	DMGDH/CHDH	2
BP	GO:0072330	monocarboxylic acid biosynthetic process	4/52	215/18800	0.00293145	0.0212081	0.0143896	ACOT7/HOGA1/ACSM3/AMACR	4
BP	GO:0009310	amine catabolic process	2/52	30/18800	0.00310629	0.022246	0.0150938	DMGDH/CHDH	2
BP	GO:0006066	alcohol metabolic process	5/52	361/18800	0.00314941	0.0223293	0.0151503	PCK2/ACAA2/CYP27B1/EPHX2/IDH2	5
BP	GO:0030072	peptide hormone secretion	4/52	220/18800	0.00318347	0.0223473	0.0151625	PCK2/ABAT/MPC2/HADH	4
BP	GO:0006099	tricarboxylic acid cycle	2/52	31/18800	0.00331465	0.0228608	0.0155109	IDH2/DHTKD1	2
BP	GO:0006805	xenobiotic metabolic process	3/52	108/18800	0.0033211	0.0228608	0.0155109	GLYAT/BPHL/ACSL1	3
BP	GO:0006766	vitamin metabolic process	3/52	109/18800	0.00340848	0.0232367	0.0157659	ALDH1L2/CLYBL/CYP27B1	3
BP	GO:0002790	peptide secretion	4/52	225/18800	0.00344993	0.0232953	0.0158057	PCK2/ABAT/MPC2/HADH	4
BP	GO:0006084	acetyl-CoA metabolic process	2/52	33/18800	0.00375047	0.0248761	0.0168783	ACAT1/MPC2	2
BP	GO:0045333	cellular respiration	4/52	231/18800	0.00378931	0.0248761	0.0168783	AK4/MTFR1/IDH2/DHTKD1	4
BP	GO:0046883	regulation of hormone secretion	4/52	231/18800	0.00378931	0.0248761	0.0168783	PCK2/ABAT/MPC2/HADH	4
BP	GO:0044273	sulfur compound catabolic process	2/52	34/18800	0.00397785	0.0258743	0.0175556	ACAT1/ACOT7	2
BP	GO:0042558	pteridine-containing compound metabolic process	2/52	35/18800	0.0042115	0.027145	0.0184177	ALDH1L1/ALDH1L2	2
BP	GO:1901617	organic hydroxy compound biosynthetic process	4/52	243/18800	0.00453481	0.0289656	0.019653	PCK2/ACAA2/CYP27B1/AMACR	4
BP	GO:0046887	positive regulation of hormone secretion	3/52	122/18800	0.00467433	0.0295902	0.0200768	PCK2/ABAT/MPC2	3
BP	GO:0015833	peptide transport	4/52	249/18800	0.00494225	0.0307835	0.0208865	PCK2/ABAT/MPC2/HADH	4
BP	GO:0035337	fatty-acyl-CoA metabolic process	2/52	38/18800	0.00494968	0.0307835	0.0208865	ACOT7/ACSL1	2
BP	GO:0050708	regulation of protein secretion	4/52	252/18800	0.00515492	0.0317812	0.0215634	PCK2/ABAT/MPC2/HADH	4
BP	GO:0050714	positive regulation of protein secretion	3/52	128/18800	0.00534238	0.0323333	0.021938	PCK2/ABAT/MPC2	3
BP	GO:0009410	response to xenobiotic stimulus	5/52	411/18800	0.00545063	0.0323333	0.021938	GLYAT/ABAT/BPHL/ACSL1/HADH	5
BP	GO:0006730	one-carbon metabolic process	2/52	40/18800	0.00547249	0.0323333	0.021938	ALDH1L1/ALDH1L2	2
BP	GO:0009069	serine family amino acid metabolic process	2/52	40/18800	0.00547249	0.0323333	0.021938	AGXT2/GLYAT	2
BP	GO:0019432	triglyceride biosynthetic process	2/52	40/18800	0.00547249	0.0323333	0.021938	PCK2/ACSL1	2
BP	GO:0009154	purine ribonucleotide catabolic process	2/52	41/18800	0.005743	0.0336511	0.0228321	ACAT1/ACOT7	2
BP	GO:0006195	purine nucleotide catabolic process	2/52	45/18800	0.00688494	0.0396864	0.026927	ACAT1/ACOT7	2
BP	GO:0032892	positive regulation of organic acid transport	2/52	45/18800	0.00688494	0.0396864	0.026927	ABAT/ACSL1	2
BP	GO:0009261	ribonucleotide catabolic process	2/52	46/18800	0.00718523	0.0408205	0.0276965	ACAT1/ACOT7	2
BP	GO:0046165	alcohol biosynthetic process	3/52	143/18800	0.00725442	0.0408205	0.0276965	PCK2/ACAA2/CYP27B1	3
BP	GO:0071456	cellular response to hypoxia	3/52	143/18800	0.00725442	0.0408205	0.0276965	FABP1/ACAA2/AK4	3
BP	GO:0046700	heterocycle catabolic process	5/52	443/18800	0.0074354	0.0415094	0.0281639	ALDH1L1/ALDH1L2/ACAT1/ALDH6A1/ACOT7	5
BP	GO:0046879	hormone secretion	4/52	281/18800	0.00753512	0.0417375	0.0283187	PCK2/ABAT/MPC2/HADH	4
BP	GO:0046460	neutral lipid biosynthetic process	2/52	48/18800	0.00780334	0.0425582	0.0288755	PCK2/ACSL1	2
BP	GO:0046463	acylglycerol biosynthetic process	2/52	48/18800	0.00780334	0.0425582	0.0288755	PCK2/ACSL1	2
BP	GO:0001666	response to hypoxia	4/52	286/18800	0.00800778	0.0432801	0.0293653	FABP1/ACAA2/ABAT/AK4	4
BP	GO:0042886	amide transport	4/52	287/18800	0.0081046	0.0432801	0.0293653	PCK2/ABAT/MPC2/HADH	4
BP	GO:0044272	sulfur compound biosynthetic process	3/52	149/18800	0.00811883	0.0432801	0.0293653	ACAT1/MPC2/ACSL1	3
BP	GO:0009914	hormone transport	4/52	290/18800	0.00839969	0.0440237	0.0298698	PCK2/ABAT/MPC2/HADH	4
BP	GO:0036294	cellular response to decreased oxygen levels	3/52	151/18800	0.00841988	0.0440237	0.0298698	FABP1/ACAA2/AK4	3
BP	GO:0072523	purine-containing compound catabolic process	2/52	50/18800	0.0084446	0.0440237	0.0298698	ACAT1/ACOT7	2
BP	GO:1905039	carboxylic acid transmembrane transport	3/52	152/18800	0.00857285	0.0443661	0.0301021	SFXN2/MPC2/ACSL1	3
BP	GO:1903825	organic acid transmembrane transport	3/52	153/18800	0.00872745	0.0448389	0.0304229	SFXN2/MPC2/ACSL1	3
BP	GO:0019439	aromatic compound catabolic process	5/52	466/18800	0.00914276	0.0466347	0.0316414	ALDH1L1/ALDH1L2/ACAT1/ACOT7/EPHX2	5
BP	GO:0036293	response to decreased oxygen levels	4/52	299/18800	0.00932715	0.0472354	0.0320489	FABP1/ACAA2/ABAT/AK4	4
BP	GO:0071453	cellular response to oxygen levels	3/52	166/18800	0.0108874	0.054746	0.0371449	FABP1/ACAA2/AK4	3
BP	GO:0022900	electron transport chain	3/52	167/18800	0.0110653	0.0552483	0.0374857	DMGDH/ALDH4A1/DHRS2	3
BP	GO:0071466	cellular response to xenobiotic stimulus	3/52	168/18800	0.0112448	0.055752	0.0378274	GLYAT/BPHL/ACSL1	3
BP	GO:0015980	energy derivation by oxidation of organic compounds	4/52	321/18800	0.0118698	0.0584421	0.0396526	AK4/MTFR1/IDH2/DHTKD1	4
BP	GO:0055088	lipid homeostasis	3/52	173/18800	0.0121676	0.059477	0.0403548	MTCH2/ACSM3/EPHX2	3
BP	GO:0070482	response to oxygen levels	4/52	324/18800	0.0122477	0.059477	0.0403548	FABP1/ACAA2/ABAT/AK4	4
BP	GO:0006694	steroid biosynthetic process	3/52	175/18800	0.0125486	0.0605235	0.0410649	ACAA2/CYP27B1/AMACR	3
BP	GO:0001659	temperature homeostasis	3/52	177/18800	0.0129364	0.0619724	0.0420479	ABAT/ACSL1/HADH	3
BP	GO:0006767	water-soluble vitamin metabolic process	2/52	63/18800	0.0131591	0.0621986	0.0422014	ALDH1L2/CLYBL	2
BP	GO:0046173	polyol biosynthetic process	2/52	63/18800	0.0131591	0.0621986	0.0422014	PCK2/CYP27B1	2
BP	GO:0062197	cellular response to chemical stress	4/52	332/18800	0.0132933	0.0624169	0.0423495	FABP1/MSRA/DHRS2/EFHD1	4
BP	GO:0015909	long-chain fatty acid transport	2/52	66/18800	0.0143769	0.0670606	0.0455002	FABP1/ACSL1	2
BP	GO:0009306	protein secretion	4/52	350/18800	0.0158505	0.0730517	0.0495652	PCK2/ABAT/MPC2/HADH	4
BP	GO:0035592	establishment of protein localization to extracellular region	4/52	351/18800	0.016001	0.0730517	0.0495652	PCK2/ABAT/MPC2/HADH	4
BP	GO:0032890	regulation of organic acid transport	2/52	70/18800	0.0160734	0.0730517	0.0495652	ABAT/ACSL1	2
BP	GO:1901607	alpha-amino acid biosynthetic process	2/52	70/18800	0.0160734	0.0730517	0.0495652	AGXT2/GLS	2
BP	GO:0009166	nucleotide catabolic process	2/52	72/18800	0.0169524	0.0765557	0.0519426	ACAT1/ACOT7	2
BP	GO:0071692	protein localization to extracellular region	4/52	359/18800	0.0172379	0.0773525	0.0524833	PCK2/ABAT/MPC2/HADH	4
BP	GO:1901292	nucleoside phosphate catabolic process	2/52	82/18800	0.021644	0.0965133	0.0654838	ACAT1/ACOT7	2
BP	GO:0046031	ADP metabolic process	2/52	90/18800	0.0257396	0.114059	0.0773881	AK4/DHTKD1	2
BP	GO:0015911	long-chain fatty acid import across plasma membrane	1/52	10/18800	0.0273243	0.117412	0.0796632	ACSL1	1
BP	GO:0042368	vitamin D biosynthetic process	1/52	10/18800	0.0273243	0.117412	0.0796632	CYP27B1	1
BP	GO:0070472	regulation of uterine smooth muscle contraction	1/52	10/18800	0.0273243	0.117412	0.0796632	ABAT	1
BP	GO:1901401	regulation of tetrapyrrole metabolic process	1/52	10/18800	0.0273243	0.117412	0.0796632	CLYBL	1
BP	GO:1902224	ketone body metabolic process	1/52	10/18800	0.0273243	0.117412	0.0796632	ACAT1	1
BP	GO:0006086	acetyl-CoA biosynthetic process from pyruvate	1/52	11/18800	0.0300161	0.119987	0.0814103	MPC2	1
BP	GO:0014051	gamma-aminobutyric acid secretion	1/52	11/18800	0.0300161	0.119987	0.0814103	ABAT	1
BP	GO:0032000	positive regulation of fatty acid beta-oxidation	1/52	11/18800	0.0300161	0.119987	0.0814103	FABP1	1
BP	GO:0032329	serine transport	1/52	11/18800	0.0300161	0.119987	0.0814103	SFXN2	1
BP	GO:0032351	negative regulation of hormone metabolic process	1/52	11/18800	0.0300161	0.119987	0.0814103	CYP27B1	1
BP	GO:0042135	neurotransmitter catabolic process	1/52	11/18800	0.0300161	0.119987	0.0814103	ABAT	1
BP	GO:0046940	nucleoside monophosphate phosphorylation	1/52	11/18800	0.0300161	0.119987	0.0814103	AK4	1
BP	GO:0070471	uterine smooth muscle contraction	1/52	11/18800	0.0300161	0.119987	0.0814103	ABAT	1
BP	GO:0070561	vitamin D receptor signaling pathway	1/52	11/18800	0.0300161	0.119987	0.0814103	CYP27B1	1
BP	GO:0071472	cellular response to salt stress	1/52	11/18800	0.0300161	0.119987	0.0814103	EFHD1	1
BP	GO:0106049	regulation of cellular response to osmotic stress	1/52	11/18800	0.0300161	0.119987	0.0814103	EFHD1	1
BP	GO:0042632	cholesterol homeostasis	2/52	98/18800	0.0301236	0.119987	0.0814103	ACSM3/EPHX2	2
BP	GO:0120162	positive regulation of cold-induced thermogenesis	2/52	98/18800	0.0301236	0.119987	0.0814103	ACSL1/HADH	2
BP	GO:0006165	nucleoside diphosphate phosphorylation	2/52	99/18800	0.0306912	0.120221	0.0815694	AK4/DHTKD1	2
BP	GO:0015908	fatty acid transport	2/52	99/18800	0.0306912	0.120221	0.0815694	FABP1/ACSL1	2
BP	GO:0055092	sterol homeostasis	2/52	99/18800	0.0306912	0.120221	0.0815694	ACSM3/EPHX2	2
BP	GO:0046939	nucleotide phosphorylation	2/52	100/18800	0.031263	0.121788	0.0826326	AK4/DHTKD1	2
BP	GO:0000041	transition metal ion transport	2/52	101/18800	0.031839	0.121873	0.0826903	SLC25A37/SLC30A9	2
BP	GO:0001967	suckling behavior	1/52	12/18800	0.0327006	0.121873	0.0826903	GLS	1
BP	GO:0010635	regulation of mitochondrial fusion	1/52	12/18800	0.0327006	0.121873	0.0826903	MTCH2	1
BP	GO:0019321	pentose metabolic process	1/52	12/18800	0.0327006	0.121873	0.0826903	DCXR	1
BP	GO:0031650	regulation of heat generation	1/52	12/18800	0.0327006	0.121873	0.0826903	ABAT	1
BP	GO:0090331	negative regulation of platelet aggregation	1/52	12/18800	0.0327006	0.121873	0.0826903	ABAT	1
BP	GO:1901029	negative regulation of mitochondrial outer membrane permeabilization involved in apoptotic signaling pathway	1/52	12/18800	0.0327006	0.121873	0.0826903	ACAA2	1
BP	GO:0006641	triglyceride metabolic process	2/52	103/18800	0.0330037	0.121873	0.0826903	PCK2/ACSL1	2
BP	GO:0009135	purine nucleoside diphosphate metabolic process	2/52	103/18800	0.0330037	0.121873	0.0826903	AK4/DHTKD1	2
BP	GO:0009179	purine ribonucleoside diphosphate metabolic process	2/52	103/18800	0.0330037	0.121873	0.0826903	AK4/DHTKD1	2
BP	GO:0019218	regulation of steroid metabolic process	2/52	104/18800	0.0335923	0.123404	0.0837289	CYP27B1/EPHX2	2
BP	GO:0031667	response to nutrient levels	4/52	446/18800	0.0346106	0.123561	0.0838354	ACAT1/PCK2/ACSL1/CYP27B1	4
BP	GO:0032868	response to insulin	3/52	259/18800	0.0348257	0.123561	0.0838354	PCK2/ECHDC3/HADH	3
BP	GO:0002087	regulation of respiratory gaseous exchange by nervous system process	1/52	13/18800	0.0353778	0.123561	0.0838354	GLS	1
BP	GO:0009133	nucleoside diphosphate biosynthetic process	1/52	13/18800	0.0353778	0.123561	0.0838354	AK4	1
BP	GO:0033604	negative regulation of catecholamine secretion	1/52	13/18800	0.0353778	0.123561	0.0838354	ABAT	1
BP	GO:0042362	fat-soluble vitamin biosynthetic process	1/52	13/18800	0.0353778	0.123561	0.0838354	CYP27B1	1
BP	GO:0042363	fat-soluble vitamin catabolic process	1/52	13/18800	0.0353778	0.123561	0.0838354	CYP27B1	1
BP	GO:0042538	hyperosmotic salinity response	1/52	13/18800	0.0353778	0.123561	0.0838354	EFHD1	1
BP	GO:0042541	hemoglobin biosynthetic process	1/52	13/18800	0.0353778	0.123561	0.0838354	SLC25A37	1
BP	GO:0071474	cellular hyperosmotic response	1/52	13/18800	0.0353778	0.123561	0.0838354	EFHD1	1
BP	GO:0023061	signal release	4/52	451/18800	0.0358349	0.124544	0.0845023	PCK2/ABAT/MPC2/HADH	4
BP	GO:0001676	long-chain fatty acid metabolic process	2/52	111/18800	0.0378265	0.126055	0.0855279	ACOT7/ACSL1	2
BP	GO:0006596	polyamine biosynthetic process	1/52	14/18800	0.0380478	0.126055	0.0855279	AGMAT	1
BP	GO:0009235	cobalamin metabolic process	1/52	14/18800	0.0380478	0.126055	0.0855279	CLYBL	1
BP	GO:0015697	quaternary ammonium group transport	1/52	14/18800	0.0380478	0.126055	0.0855279	SLC25A48	1
BP	GO:0034111	negative regulation of homotypic cell-cell adhesion	1/52	14/18800	0.0380478	0.126055	0.0855279	ABAT	1
BP	GO:0043650	dicarboxylic acid biosynthetic process	1/52	14/18800	0.0380478	0.126055	0.0855279	GLS	1
BP	GO:0047484	regulation of response to osmotic stress	1/52	14/18800	0.0380478	0.126055	0.0855279	EFHD1	1
BP	GO:0048148	behavioral response to cocaine	1/52	14/18800	0.0380478	0.126055	0.0855279	ABAT	1
BP	GO:0072350	tricarboxylic acid metabolic process	1/52	14/18800	0.0380478	0.126055	0.0855279	IDH2	1
BP	GO:1901160	primary amino compound metabolic process	1/52	14/18800	0.0380478	0.126055	0.0855279	AGMAT	1
BP	GO:0009185	ribonucleoside diphosphate metabolic process	2/52	112/18800	0.0384474	0.126787	0.0860243	AK4/DHTKD1	2
BP	GO:1903532	positive regulation of secretion by cell	3/52	274/18800	0.0400971	0.128283	0.0870395	PCK2/ABAT/MPC2	3
BP	GO:0006206	pyrimidine nucleobase metabolic process	1/52	15/18800	0.0407105	0.128283	0.0870395	ALDH6A1	1
BP	GO:0009111	vitamin catabolic process	1/52	15/18800	0.0407105	0.128283	0.0870395	CYP27B1	1
BP	GO:0046321	positive regulation of fatty acid oxidation	1/52	15/18800	0.0407105	0.128283	0.0870395	FABP1	1
BP	GO:0046655	folic acid metabolic process	1/52	15/18800	0.0407105	0.128283	0.0870395	ALDH1L2	1
BP	GO:0051791	medium-chain fatty acid metabolic process	1/52	15/18800	0.0407105	0.128283	0.0870395	ACOT7	1
BP	GO:0051956	negative regulation of amino acid transport	1/52	15/18800	0.0407105	0.128283	0.0870395	ABAT	1
BP	GO:0060080	inhibitory postsynaptic potential	1/52	15/18800	0.0407105	0.128283	0.0870395	ABAT	1
BP	GO:0070207	protein homotrimerization	1/52	15/18800	0.0407105	0.128283	0.0870395	CLYBL	1
BP	GO:0070365	hepatocyte differentiation	1/52	15/18800	0.0407105	0.128283	0.0870395	PCK2	1
BP	GO:0019751	polyol metabolic process	2/52	116/18800	0.0409698	0.128529	0.0872063	PCK2/CYP27B1	2
BP	GO:0006720	isoprenoid metabolic process	2/52	117/18800	0.04161	0.129962	0.0881788	PHYH/PDSS1	2
BP	GO:0046942	carboxylic acid transport	3/52	279/18800	0.0419397	0.130418	0.0884877	SFXN2/ABAT/MPC2	3
BP	GO:0009991	response to extracellular stimulus	4/52	479/18800	0.0431552	0.131959	0.0895335	ACAT1/PCK2/ACSL1/CYP27B1	4
BP	GO:0006555	methionine metabolic process	1/52	16/18800	0.0433659	0.131959	0.0895335	MSRA	1
BP	GO:0031649	heat generation	1/52	16/18800	0.0433659	0.131959	0.0895335	ABAT	1
BP	GO:0044065	regulation of respiratory system process	1/52	16/18800	0.0433659	0.131959	0.0895335	GLS	1
BP	GO:1902931	negative regulation of alcohol biosynthetic process	1/52	16/18800	0.0433659	0.131959	0.0895335	CYP27B1	1
BP	GO:0034599	cellular response to oxidative stress	3/52	284/18800	0.0438247	0.132785	0.0900939	FABP1/MSRA/DHRS2	3
BP	GO:0006744	ubiquinone biosynthetic process	1/52	17/18800	0.0460142	0.13537	0.0918475	PDSS1	1
BP	GO:0009084	glutamine family amino acid biosynthetic process	1/52	17/18800	0.0460142	0.13537	0.0918475	GLS	1
BP	GO:0015812	gamma-aminobutyric acid transport	1/52	17/18800	0.0460142	0.13537	0.0918475	ABAT	1
BP	GO:0020027	hemoglobin metabolic process	1/52	17/18800	0.0460142	0.13537	0.0918475	SLC25A37	1
BP	GO:0044539	long-chain fatty acid import into cell	1/52	17/18800	0.0460142	0.13537	0.0918475	ACSL1	1
BP	GO:0070206	protein trimerization	1/52	17/18800	0.0460142	0.13537	0.0918475	CLYBL	1
BP	GO:1901663	quinone biosynthetic process	1/52	17/18800	0.0460142	0.13537	0.0918475	PDSS1	1
BP	GO:0051222	positive regulation of protein transport	3/52	293/18800	0.0473235	0.136891	0.09288	PCK2/ABAT/MPC2	3
BP	GO:0051223	regulation of protein transport	4/52	495/18800	0.0476929	0.136891	0.09288	PCK2/ABAT/MPC2/HADH	4
BP	GO:0006595	polyamine metabolic process	1/52	18/18800	0.0486553	0.136891	0.09288	AGMAT	1
BP	GO:0006743	ubiquinone metabolic process	1/52	18/18800	0.0486553	0.136891	0.09288	PDSS1	1
BP	GO:0032769	negative regulation of monooxygenase activity	1/52	18/18800	0.0486553	0.136891	0.09288	CYP27B1	1
BP	GO:0034433	steroid esterification	1/52	18/18800	0.0486553	0.136891	0.09288	ACAT1	1
BP	GO:0034434	sterol esterification	1/52	18/18800	0.0486553	0.136891	0.09288	ACAT1	1
BP	GO:0034435	cholesterol esterification	1/52	18/18800	0.0486553	0.136891	0.09288	ACAT1	1
BP	GO:0072234	metanephric nephron tubule development	1/52	18/18800	0.0486553	0.136891	0.09288	ACAT1	1
BP	GO:0140354	lipid import into cell	1/52	18/18800	0.0486553	0.136891	0.09288	ACSL1	1
BP	GO:1902001	fatty acid transmembrane transport	1/52	18/18800	0.0486553	0.136891	0.09288	ACSL1	1
CC	GO:0005759	mitochondrial matrix	27/55	473/19594	2.11576e-29	6.982e-28	4.23151e-28	ECHS1/ALDH1L2/ACAT1/AGXT2/PCCA/PCCB/DMGDH/LACTB2/PCK2/ALDH6A1/ALDH4A1/ACAA2/GLYAT/FAHD1/ABAT/GLS/HOGA1/DHRS2/AK4/ACSM3/MCCC2/ACADSB/HADH/IDH2/DHTKD1/HIBCH/PDSS1	27
CC	GO:0005782	peroxisomal matrix	6/55	50/19594	5.33699e-09	3.5573e-08	2.15594e-08	HAO2/FABP1/PHYH/EPHX2/AMACR/EHHADH	6
CC	GO:0031907	microbody lumen	6/55	50/19594	5.33699e-09	3.5573e-08	2.15594e-08	HAO2/FABP1/PHYH/EPHX2/AMACR/EHHADH	6
CC	GO:0005777	peroxisome	8/55	141/19594	5.38985e-09	3.5573e-08	2.15594e-08	HAO2/FABP1/ACSL1/PHYH/EPHX2/IDH2/AMACR/EHHADH	8
CC	GO:0042579	microbody	8/55	141/19594	5.38985e-09	3.5573e-08	2.15594e-08	HAO2/FABP1/ACSL1/PHYH/EPHX2/IDH2/AMACR/EHHADH	8
CC	GO:0005743	mitochondrial inner membrane	8/55	491/19594	6.35499e-05	0.000349524	0.000211833	SFXN2/MTCH2/SLC25A48/SLC25A37/CHDH/MPC2/EFHD1/PRODH2	8
CC	GO:0005741	mitochondrial outer membrane	4/55	205/19594	0.00261564	0.0123309	0.00747327	MTCH2/BPHL/ACSL1/CYP27B1	4
CC	GO:0031968	organelle outer membrane	4/55	232/19594	0.00407219	0.0153928	0.00932897	MTCH2/BPHL/ACSL1/CYP27B1	4
CC	GO:0019867	outer membrane	4/55	234/19594	0.00419804	0.0153928	0.00932897	MTCH2/BPHL/ACSL1/CYP27B1	4
CC	GO:0031305	integral component of mitochondrial inner membrane	2/55	56/19594	0.0108127	0.0335576	0.0203379	SFXN2/MPC2	2
CC	GO:0031304	intrinsic component of mitochondrial inner membrane	2/55	57/19594	0.0111859	0.0335576	0.0203379	SFXN2/MPC2	2
CC	GO:0032592	integral component of mitochondrial membrane	2/55	88/19594	0.0253883	0.0671881	0.0407201	SFXN2/MPC2	2
CC	GO:0098573	intrinsic component of mitochondrial membrane	2/55	90/19594	0.0264681	0.0671881	0.0407201	SFXN2/MPC2	2
CC	GO:0045179	apical cortex	1/55	11/19594	0.0304547	0.0717862	0.0435068	FABP1	1
MF	GO:0016645	oxidoreductase activity, acting on the CH-NH group of donors	5/54	29/18410	2.02156e-08	2.62803e-06	1.42573e-06	ALDH1L1/ALDH1L2/DMGDH/ALDH4A1/PRODH2	5
MF	GO:0016614	oxidoreductase activity, acting on CH-OH group of donors	7/54	140/18410	1.6624e-07	9.73704e-06	5.28245e-06	HAO2/CHDH/DHRS2/HADH/IDH2/DCXR/EHHADH	7
MF	GO:0016903	oxidoreductase activity, acting on the aldehyde or oxo group of donors	5/54	46/18410	2.24701e-07	9.73704e-06	5.28245e-06	ALDH1L1/ALDH1L2/ALDH6A1/ALDH4A1/DHTKD1	5
MF	GO:0016829	lyase activity	7/54	195/18410	1.56108e-06	5.0735e-05	2.75242e-05	ECHS1/PCK2/ECHDC3/CLYBL/FAHD1/HOGA1/EHHADH	7
MF	GO:0004300	enoyl-CoA hydratase activity	3/54	10/18410	2.82125e-06	7.33525e-05	3.97945e-05	ECHS1/ECHDC3/EHHADH	3
MF	GO:0016620	oxidoreductase activity, acting on the aldehyde or oxo group of donors, NAD or NADP as acceptor	4/54	38/18410	4.53121e-06	9.81762e-05	5.32616e-05	ALDH1L1/ALDH1L2/ALDH6A1/ALDH4A1	4
MF	GO:0004029	aldehyde dehydrogenase (NAD+) activity	3/54	15/18410	1.05867e-05	0.000196609	0.000106662	ALDH1L1/ALDH1L2/ALDH4A1	3
MF	GO:0004030	aldehyde dehydrogenase [NAD(P)+] activity	3/54	16/18410	1.30027e-05	0.000198951	0.000107933	ALDH1L1/ALDH1L2/ALDH4A1	3
MF	GO:0016830	carbon-carbon lyase activity	4/54	50/18410	1.37736e-05	0.000198951	0.000107933	PCK2/CLYBL/FAHD1/HOGA1	4
MF	GO:0016646	oxidoreductase activity, acting on the CH-NH group of donors, NAD or NADP as acceptor	3/54	19/18410	2.23595e-05	0.000290673	0.000157693	ALDH1L1/ALDH1L2/ALDH4A1	3
MF	GO:0016408	C-acyltransferase activity	3/54	20/18410	2.62507e-05	0.000310236	0.000168306	ACAT1/ACAA2/ACSM3	3
MF	GO:0016616	oxidoreductase activity, acting on the CH-OH group of donors, NAD or NADP as acceptor	5/54	128/18410	3.6158e-05	0.000391712	0.000212507	DHRS2/HADH/IDH2/DCXR/EHHADH	5
MF	GO:0016289	CoA hydrolase activity	3/54	25/18410	5.2415e-05	0.00052415	0.000284356	ACAA2/ACOT7/HIBCH	3
MF	GO:0019842	vitamin binding	5/54	148/18410	7.22618e-05	0.000671003	0.000364026	AGXT2/PCCA/ABAT/PHYH/DHTKD1	5
MF	GO:0016874	ligase activity	5/54	165/18410	0.000120713	0.00104618	0.000567563	PCCA/PCCB/ACSM3/MCCC2/ACSL1	5
MF	GO:0016790	thiolester hydrolase activity	3/54	45/18410	0.000310239	0.00252069	0.0013675	ACAA2/ACOT7/HIBCH	3
MF	GO:0051287	NAD binding	3/54	51/18410	0.000449679	0.00343872	0.00186554	HADH/IDH2/EHHADH	3
MF	GO:0016746	acyltransferase activity	5/54	244/18410	0.000731232	0.00528112	0.00286506	ACAT1/CLYBL/ACAA2/GLYAT/ACSM3	5
MF	GO:0102991	myristoyl-CoA hydrolase activity	2/54	15/18410	0.000865257	0.00569259	0.00308829	ACAA2/ACOT7	2
MF	GO:0016836	hydro-lyase activity	3/54	64/18410	0.000875782	0.00569259	0.00308829	ECHS1/ECHDC3/EHHADH	3
MF	GO:0070403	NAD+ binding	2/54	16/18410	0.000987007	0.00611005	0.00331476	HADH/EHHADH	2
MF	GO:0016290	palmitoyl-CoA hydrolase activity	2/54	17/18410	0.00111651	0.00659754	0.00357923	ACAA2/ACOT7	2
MF	GO:0016835	carbon-oxygen lyase activity	3/54	79/18410	0.00161152	0.0091086	0.00494151	ECHS1/ECHDC3/EHHADH	3
MF	GO:0000062	fatty-acyl-CoA binding	2/54	22/18410	0.00187869	0.00920648	0.00499461	ALDH6A1/ACOT7	2
MF	GO:0015645	fatty acid ligase activity	2/54	22/18410	0.00187869	0.00920648	0.00499461	ACSM3/ACSL1	2
MF	GO:0050660	flavin adenine dinucleotide binding	3/54	85/18410	0.00198802	0.00920648	0.00499461	CHDH/ACADSB/PRODH2	3
MF	GO:0008483	transaminase activity	2/54	23/18410	0.00205375	0.00920648	0.00499461	AGXT2/ABAT	2
MF	GO:0047617	acyl-CoA hydrolase activity	2/54	23/18410	0.00205375	0.00920648	0.00499461	ACAA2/ACOT7	2
MF	GO:1901567	fatty acid derivative binding	2/54	23/18410	0.00205375	0.00920648	0.00499461	ALDH6A1/ACOT7	2
MF	GO:0016769	transferase activity, transferring nitrogenous groups	2/54	24/18410	0.00223626	0.00969044	0.00525716	AGXT2/ABAT	2
MF	GO:0120227	acyl-CoA binding	2/54	25/18410	0.00242616	0.0101742	0.00551961	ALDH6A1/ACOT7	2
MF	GO:0016405	CoA-ligase activity	2/54	27/18410	0.00282797	0.0114886	0.0062327	ACSM3/ACSL1	2
MF	GO:0016878	acid-thiol ligase activity	2/54	31/18410	0.00371846	0.0145583	0.00789801	ACSM3/ACSL1	2
MF	GO:0016747	acyltransferase activity, transferring groups other than amino-acyl groups	4/54	218/18410	0.00380755	0.0145583	0.00789801	ACAT1/ACAA2/GLYAT/ACSM3	4
MF	GO:0016831	carboxy-lyase activity	2/54	34/18410	0.00446099	0.0165694	0.00898907	PCK2/FAHD1	2
MF	GO:0016877	ligase activity, forming carbon-sulfur bonds	2/54	41/18410	0.00643564	0.0232398	0.0126078	ACSM3/ACSL1	2
MF	GO:1901681	sulfur compound binding	4/54	267/18410	0.00775114	0.0272337	0.0147746	PCCA/ALDH6A1/ACOT7/DHTKD1	4
MF	GO:0043177	organic acid binding	3/54	141/18410	0.00820302	0.0280629	0.0152244	FABP1/PCCA/PHYH	3
MF	GO:0030170	pyridoxal phosphate binding	2/54	55/18410	0.0113539	0.0378465	0.0205321	AGXT2/ABAT	2
MF	GO:0070279	vitamin B6 binding	2/54	56/18410	0.0117525	0.0381957	0.0207215	AGXT2/ABAT	2
MF	GO:0031406	carboxylic acid binding	3/54	173/18410	0.0142472	0.0451739	0.0245073	FABP1/PCCA/PHYH	3
MF	GO:0016782	transferase activity, transferring sulphur-containing groups	2/54	69/18410	0.0174752	0.05409	0.0293444	SUGCT/ACSM3	2
MF	GO:0033293	monocarboxylic acid binding	2/54	81/18410	0.0236025	0.0713564	0.0387116	FABP1/PCCA	2
MF	GO:0000287	magnesium ion binding	3/54	222/18410	0.0273499	0.0768186	0.0416749	CLYBL/EPHX2/IDH2	3
MF	GO:0016407	acetyltransferase activity	2/54	88/18410	0.0275264	0.0768186	0.0416749	ACAT1/ACAA2	2
MF	GO:0005381	iron ion transmembrane transporter activity	1/54	10/18410	0.0289547	0.0768186	0.0416749	SLC25A37	1
MF	GO:0015643	toxic substance binding	1/54	10/18410	0.0289547	0.0768186	0.0416749	EPHX2	1
MF	GO:0016801	hydrolase activity, acting on ether bonds	1/54	10/18410	0.0289547	0.0768186	0.0416749	EPHX2	1
MF	GO:0016813	hydrolase activity, acting on carbon-nitrogen (but not peptide) bonds, in linear amidines	1/54	10/18410	0.0289547	0.0768186	0.0416749	AGMAT	1
MF	GO:0022889	serine transmembrane transporter activity	1/54	11/18410	0.0318045	0.0795113	0.0431357	SFXN2	1
MF	GO:0032052	bile acid binding	1/54	11/18410	0.0318045	0.0795113	0.0431357	FABP1	1
MF	GO:0047676	arachidonate-CoA ligase activity	1/54	11/18410	0.0318045	0.0795113	0.0431357	ACSL1	1
MF	GO:0003995	acyl-CoA dehydrogenase activity	1/54	12/18410	0.0346461	0.0834073	0.0452493	ACADSB	1
MF	GO:0030955	potassium ion binding	1/54	12/18410	0.0346461	0.0834073	0.0452493	ACAT1	1
MF	GO:0016863	intramolecular oxidoreductase activity, transposing C=C bonds	1/54	14/18410	0.0403048	0.0952659	0.0516827	EHHADH	1
MF	GO:0004467	long-chain fatty acid-CoA ligase activity	1/54	15/18410	0.0431219	0.0966525	0.052435	ACSL1	1
MF	GO:0010181	FMN binding	1/54	15/18410	0.0431219	0.0966525	0.052435	HAO2	1
MF	GO:0140299	small molecule sensor activity	1/54	15/18410	0.0431219	0.0966525	0.052435	EFHD1	1
MF	GO:0042577	lipid phosphatase activity	1/54	16/18410	0.0459309	0.100558	0.0545535	EPHX2	1
MF	GO:0004659	prenyltransferase activity	1/54	17/18410	0.0487318	0.100558	0.0545535	PDSS1	1
MF	GO:0005324	long-chain fatty acid transporter activity	1/54	17/18410	0.0487318	0.100558	0.0545535	FABP1	1
MF	GO:0016854	racemase and epimerase activity	1/54	17/18410	0.0487318	0.100558	0.0545535	AMACR	1
MF	GO:0031420	alkali metal ion binding	1/54	17/18410	0.0487318	0.100558	0.0545535	ACAT1	1

## Sheet: KEGG-enrich
ID	Description	GeneRatio	BgRatio	pvalue	p.adjust	qvalue	geneID	Count
hsa00280	Valine, leucine and isoleucine degradation	13/39	48/8586	6.4728e-21	3.88368e-19	2.38471e-19	ECHS1/ACAT1/AGXT2/PCCA/PCCB/ALDH6A1/ACAA2/ABAT/MCCC2/ACADSB/HADH/HIBCH/EHHADH	13
hsa00640	Propanoate metabolism	7/39	32/8586	7.00679e-11	2.10204e-09	1.29072e-09	ECHS1/PCCA/PCCB/ALDH6A1/ABAT/HIBCH/EHHADH	7
hsa00071	Fatty acid degradation	7/39	43/8586	6.47088e-10	1.29418e-08	7.94669e-09	ECHS1/ACAT1/ACAA2/ACSL1/ACADSB/HADH/EHHADH	7
hsa00650	Butanoate metabolism	6/39	27/8586	1.62216e-09	2.43324e-08	1.49409e-08	ECHS1/ACAT1/ABAT/ACSM3/HADH/EHHADH	6
hsa01212	Fatty acid metabolism	7/39	57/8586	5.07108e-09	6.0853e-08	3.73659e-08	ECHS1/ACAT1/ACAA2/ACSL1/ACADSB/HADH/EHHADH	7
hsa01200	Carbon metabolism	8/39	115/8586	3.52837e-08	3.52837e-07	2.16654e-07	HAO2/ECHS1/ACAT1/PCCA/PCCB/ALDH6A1/IDH2/HIBCH	8
hsa04146	Peroxisome	7/39	83/8586	7.31276e-08	6.26808e-07	3.84882e-07	HAO2/ACSL1/PHYH/EPHX2/IDH2/AMACR/EHHADH	7
hsa00630	Glyoxylate and dicarboxylate metabolism	5/39	30/8586	1.94489e-07	1.45866e-06	8.95671e-07	HAO2/ACAT1/PCCA/PCCB/HOGA1	5
hsa00410	beta-Alanine metabolism	5/39	31/8586	2.31125e-07	1.54083e-06	9.46124e-07	ECHS1/ALDH6A1/ABAT/HIBCH/EHHADH	5
hsa00380	Tryptophan metabolism	5/39	42/8586	1.11579e-06	6.69475e-06	4.11081e-06	ECHS1/ACAT1/HADH/DHTKD1/EHHADH	5
hsa00062	Fatty acid elongation	4/39	27/8586	5.91754e-06	3.22775e-05	1.98195e-05	ECHS1/ACAA2/ACOT7/HADH	4
hsa00310	Lysine degradation	5/39	63/8586	8.60081e-06	4.3004e-05	2.6406e-05	ECHS1/ACAT1/HADH/DHTKD1/EHHADH	5
hsa00250	Alanine, aspartate and glutamate metabolism	4/39	37/8586	2.1554e-05	9.94799e-05	6.10841e-05	AGXT2/ALDH4A1/ABAT/GLS	4
hsa00330	Arginine and proline metabolism	4/39	50/8586	7.20379e-05	0.000308734	0.000189574	ALDH4A1/HOGA1/AGMAT/PRODH2	4
hsa03320	PPAR signaling pathway	4/39	75/8586	0.000350439	0.00140176	0.000860728	FABP1/PCK2/ACSL1/EHHADH	4
hsa01210	2-Oxocarboxylic acid metabolism	3/39	33/8586	0.000430254	0.00161345	0.000990715	AGXT2/IDH2/DHTKD1	3
hsa00260	Glycine, serine and threonine metabolism	3/39	40/8586	0.000762197	0.00269011	0.00165182	AGXT2/DMGDH/CHDH	3
hsa00670	One carbon pool by folate	2/39	20/8586	0.00362767	0.0120922	0.00742505	ALDH1L1/ALDH1L2	2
hsa00900	Terpenoid backbone biosynthesis	2/39	23/8586	0.00478922	0.0143677	0.00882225	ACAT1/PDSS1	2
hsa04964	Proximal tubule bicarbonate reclamation	2/39	23/8586	0.00478922	0.0143677	0.00882225	PCK2/GLS	2
hsa00020	Citrate cycle (TCA cycle)	2/39	30/8586	0.0080713	0.0230608	0.0141602	PCK2/IDH2	2
hsa04975	Fat digestion and absorption	2/39	43/8586	0.0161454	0.0440329	0.0270378	FABP1/ACAT1	2
hsa00620	Pyruvate metabolism	2/39	47/8586	0.0191094	0.0498506	0.03061	ACAT1/PCK2	2
hsa04920	Adipocytokine signaling pathway	2/39	69/8586	0.038966	0.0959977	0.0589459	PCK2/ACSL1	2
hsa05230	Central carbon metabolism in cancer	2/39	70/8586	0.039999	0.0959977	0.0589459	GLS/IDH2	2
